# Supplementary material for: The first draft genomes of the ant Formica exsecta, and its Wolbachia endosymbiont reveal extensive gene transfer from endosymbiont to host
Source: Springer Nature journal article supplement (doi:10.1186/s12864-019-5665-6), 2019-04-16
Supplement: MOESM10 [file 12864_2019_5665_MOESM10_ESM.pdf]

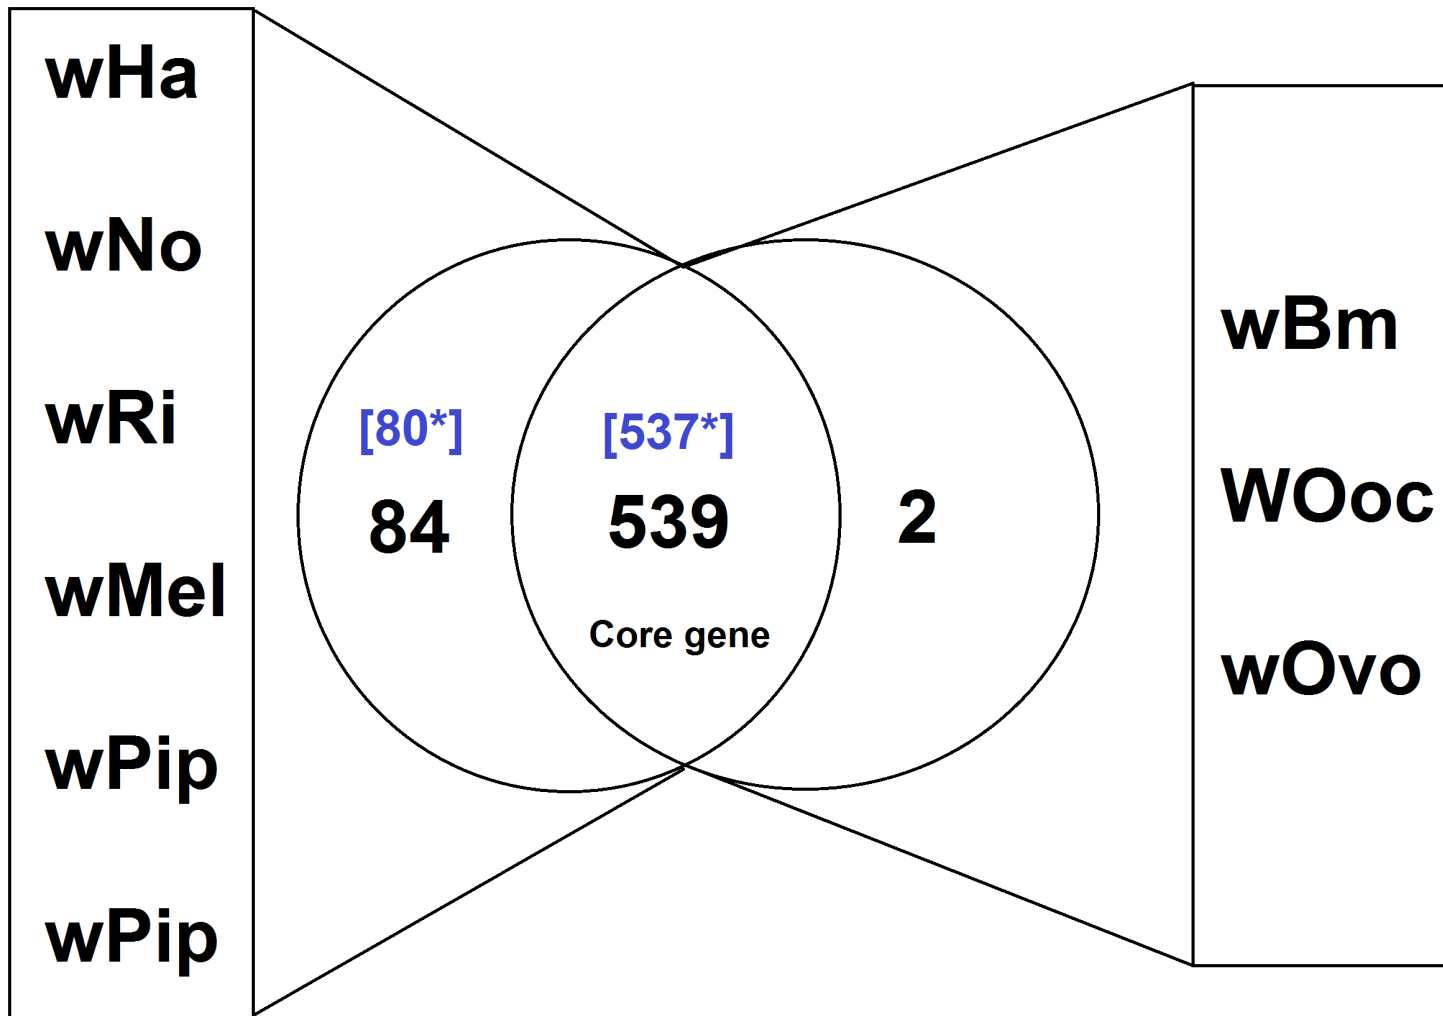

Cytoplasmic Incompatibility (CI)

Mutualist

\* Genes in wFEX Genome
