# Supplementary material for: The first draft genomes of the ant Formica exsecta, and its Wolbachia endosymbiont reveal extensive gene transfer from endosymbiont to host
Source: Springer Nature journal article supplement (doi:10.1186/s12864-019-5665-6), 2019-04-16
Supplement: MOESM12 [file 12864_2019_5665_MOESM12_ESM.pdf]

# Nuclear Wolbachia

NPMM01014360.1.22716

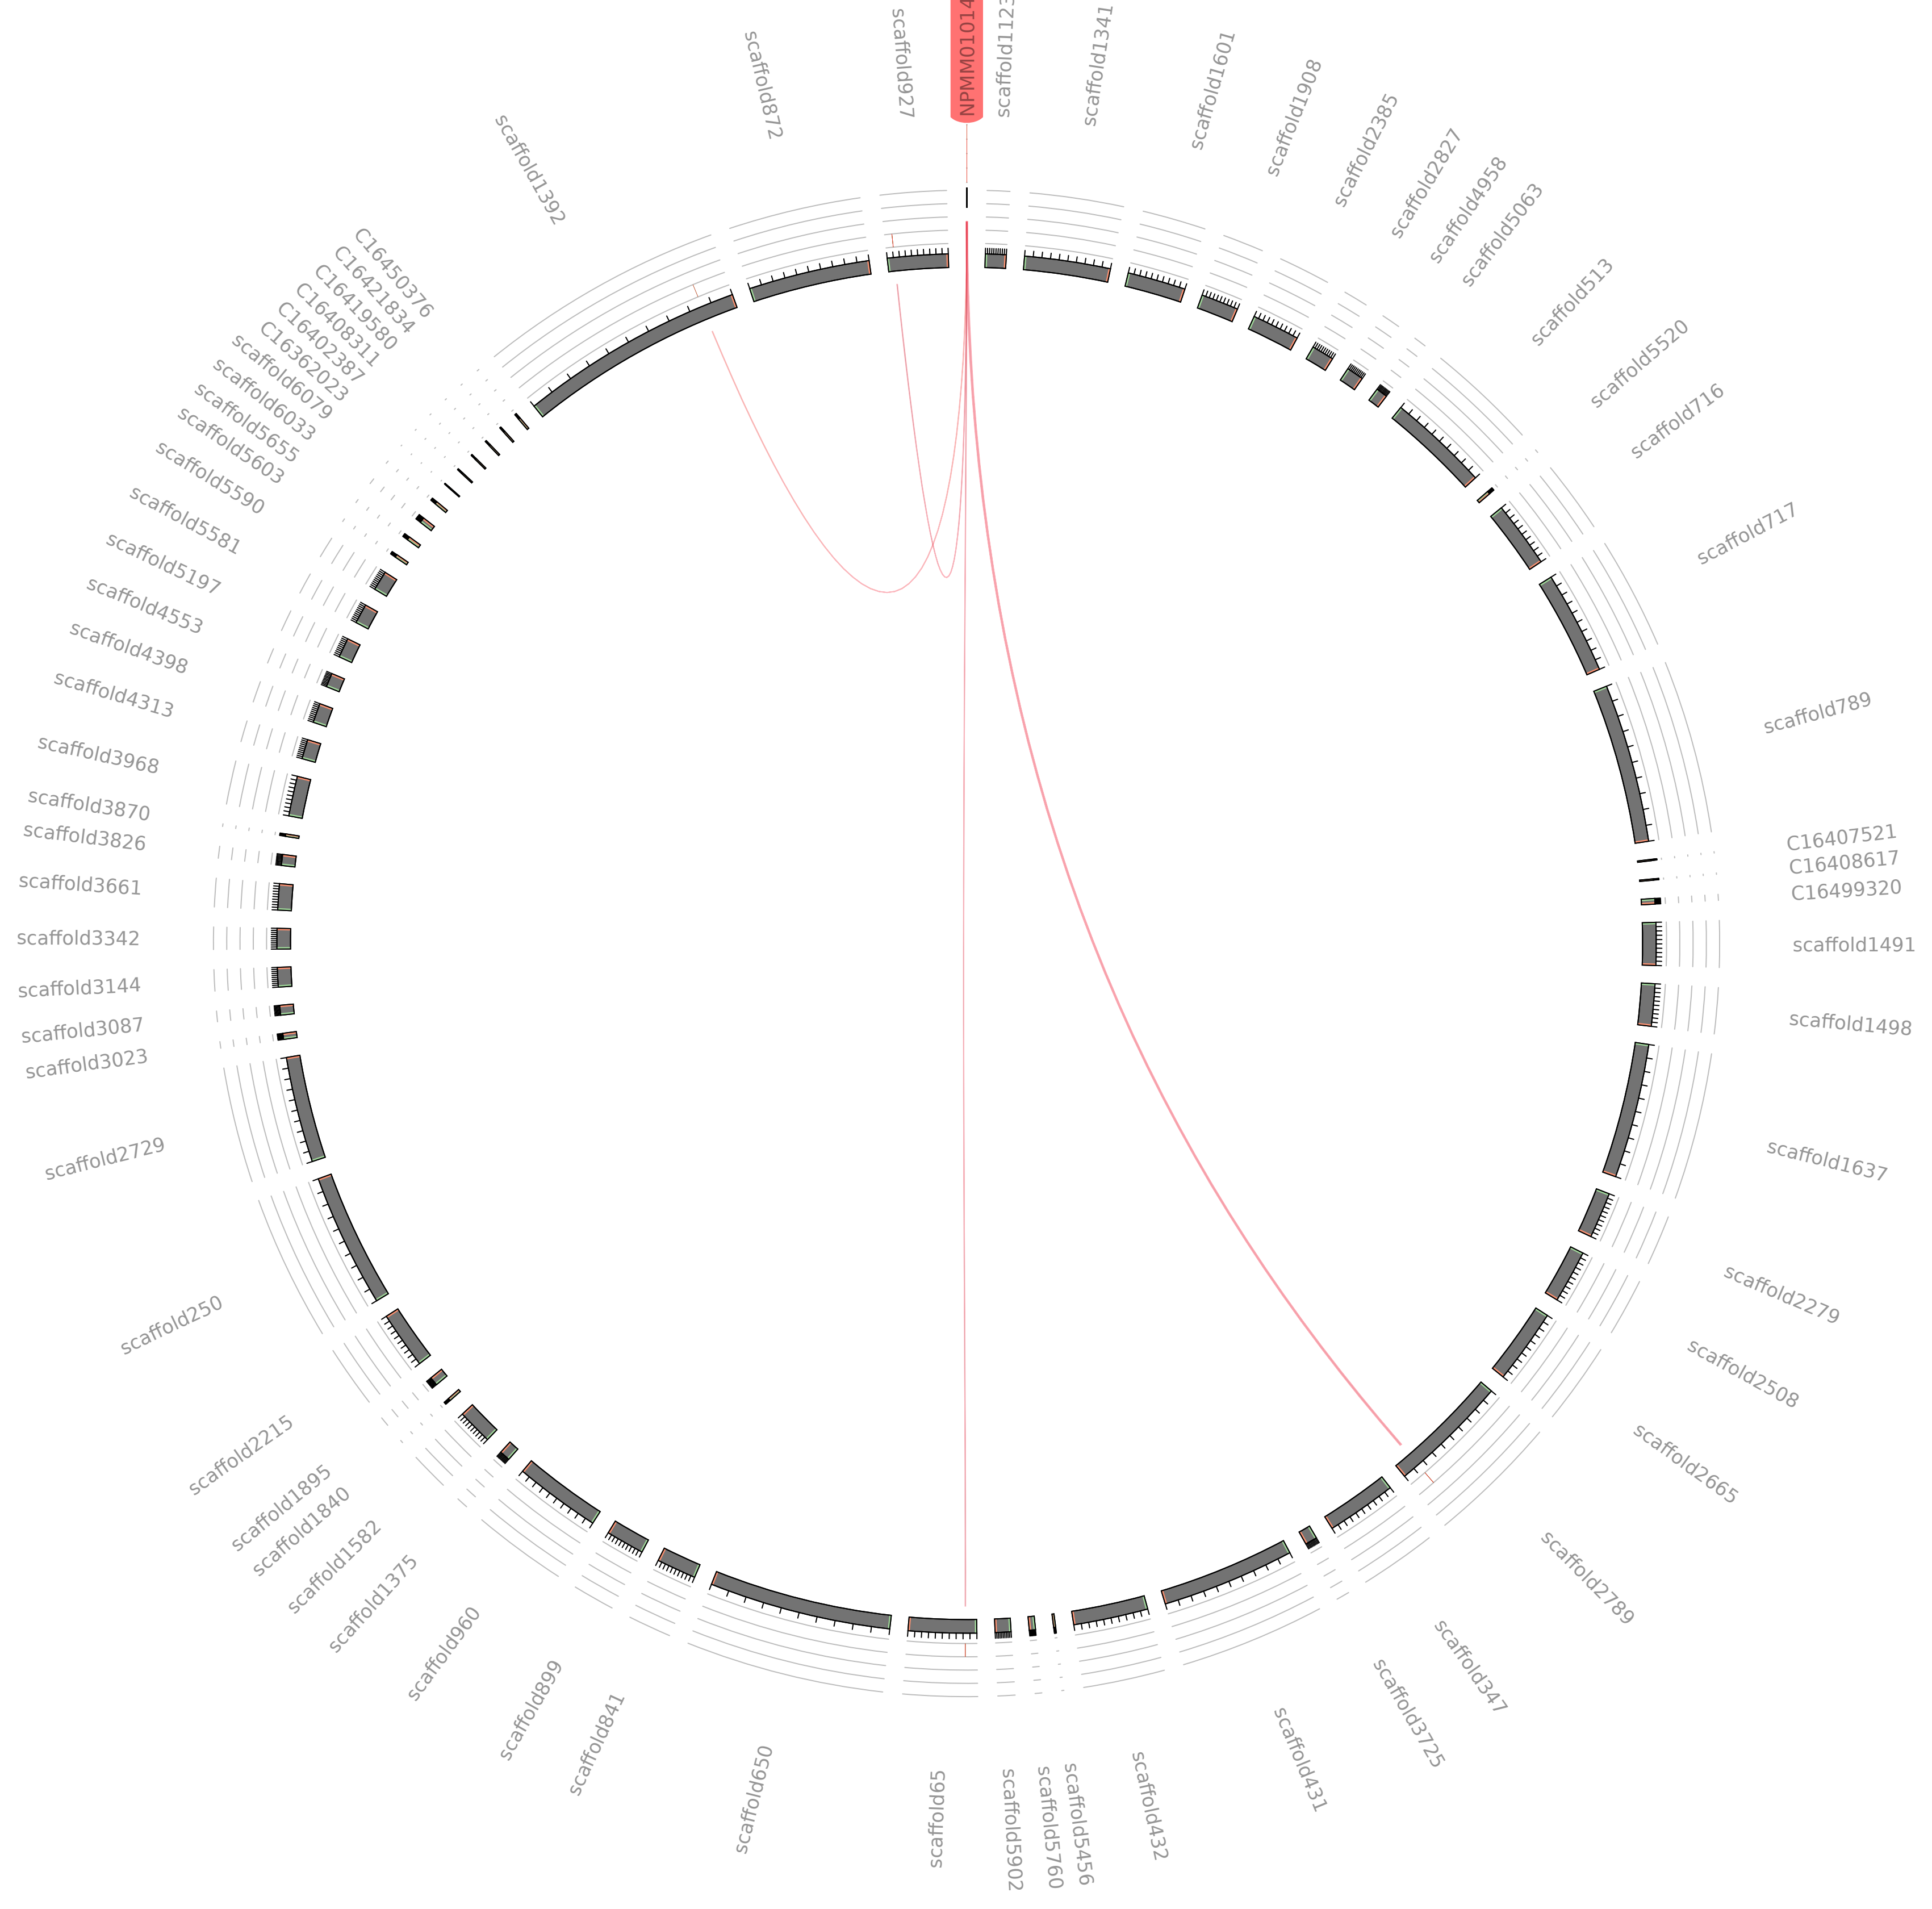

# Cytoplasmic Wolbachia





# Nuclear Wolbachia

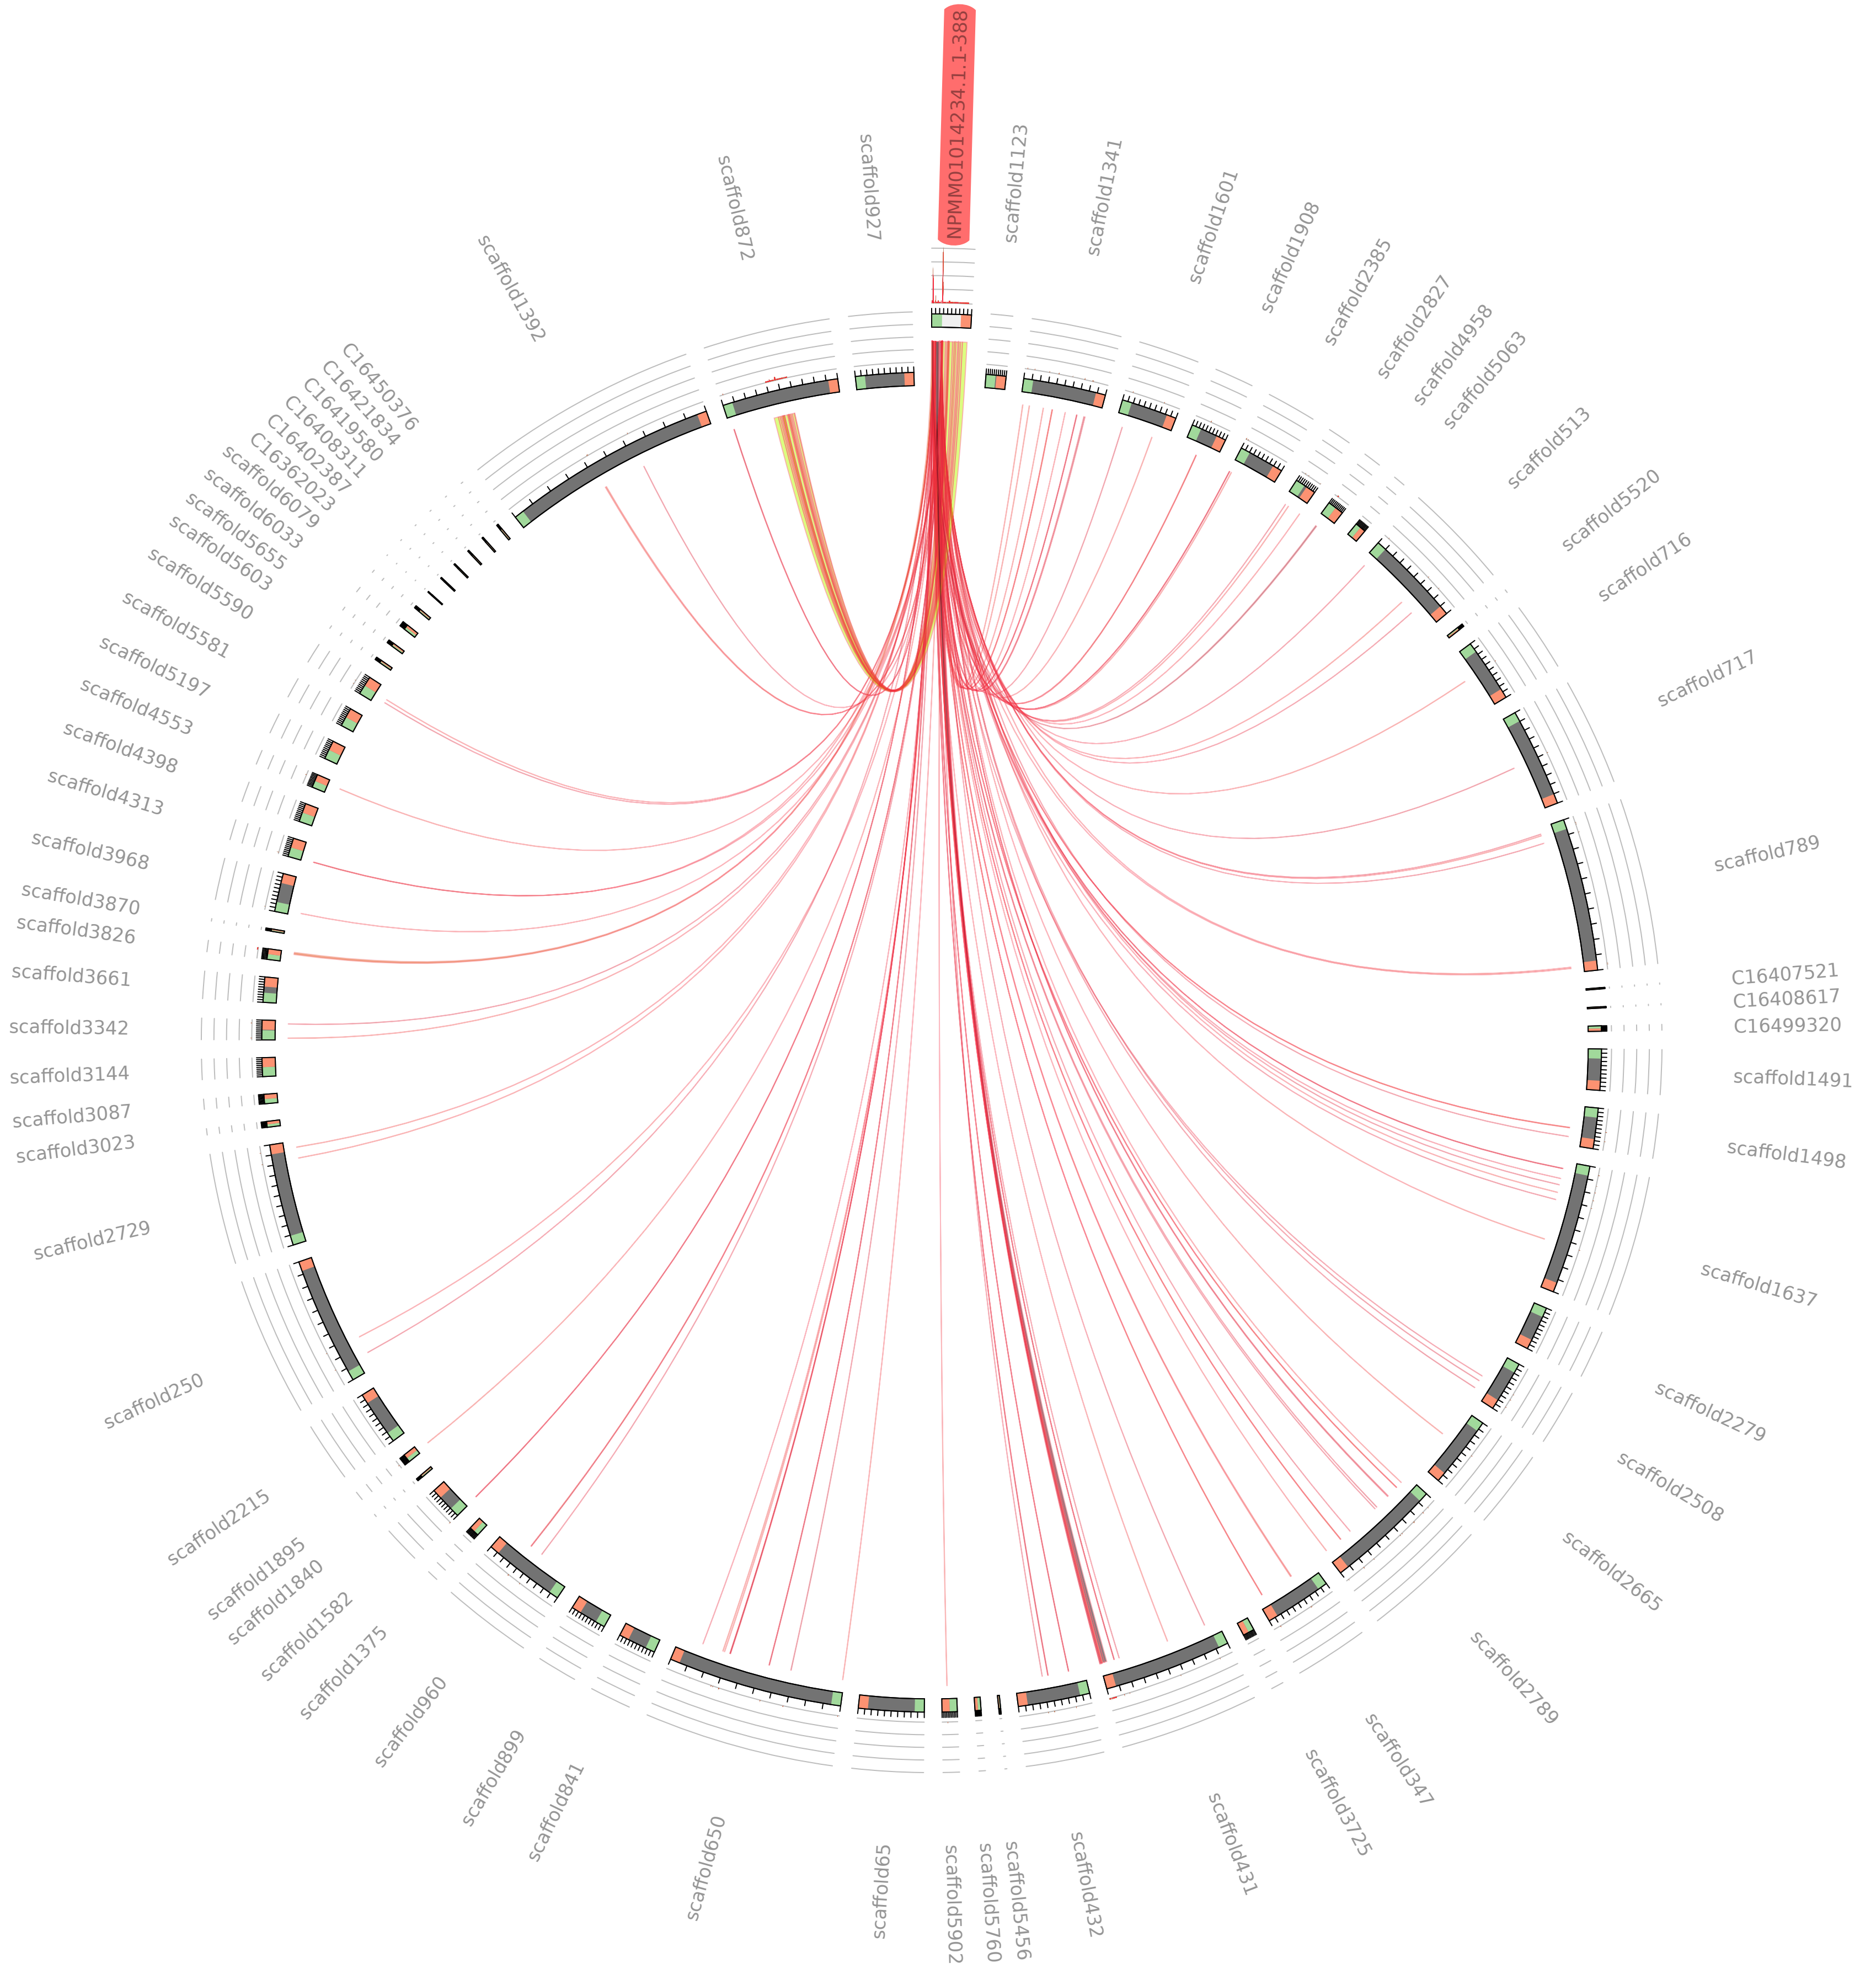

# Cytoplasmic Wolbachia

# Nuclear Wolbachia

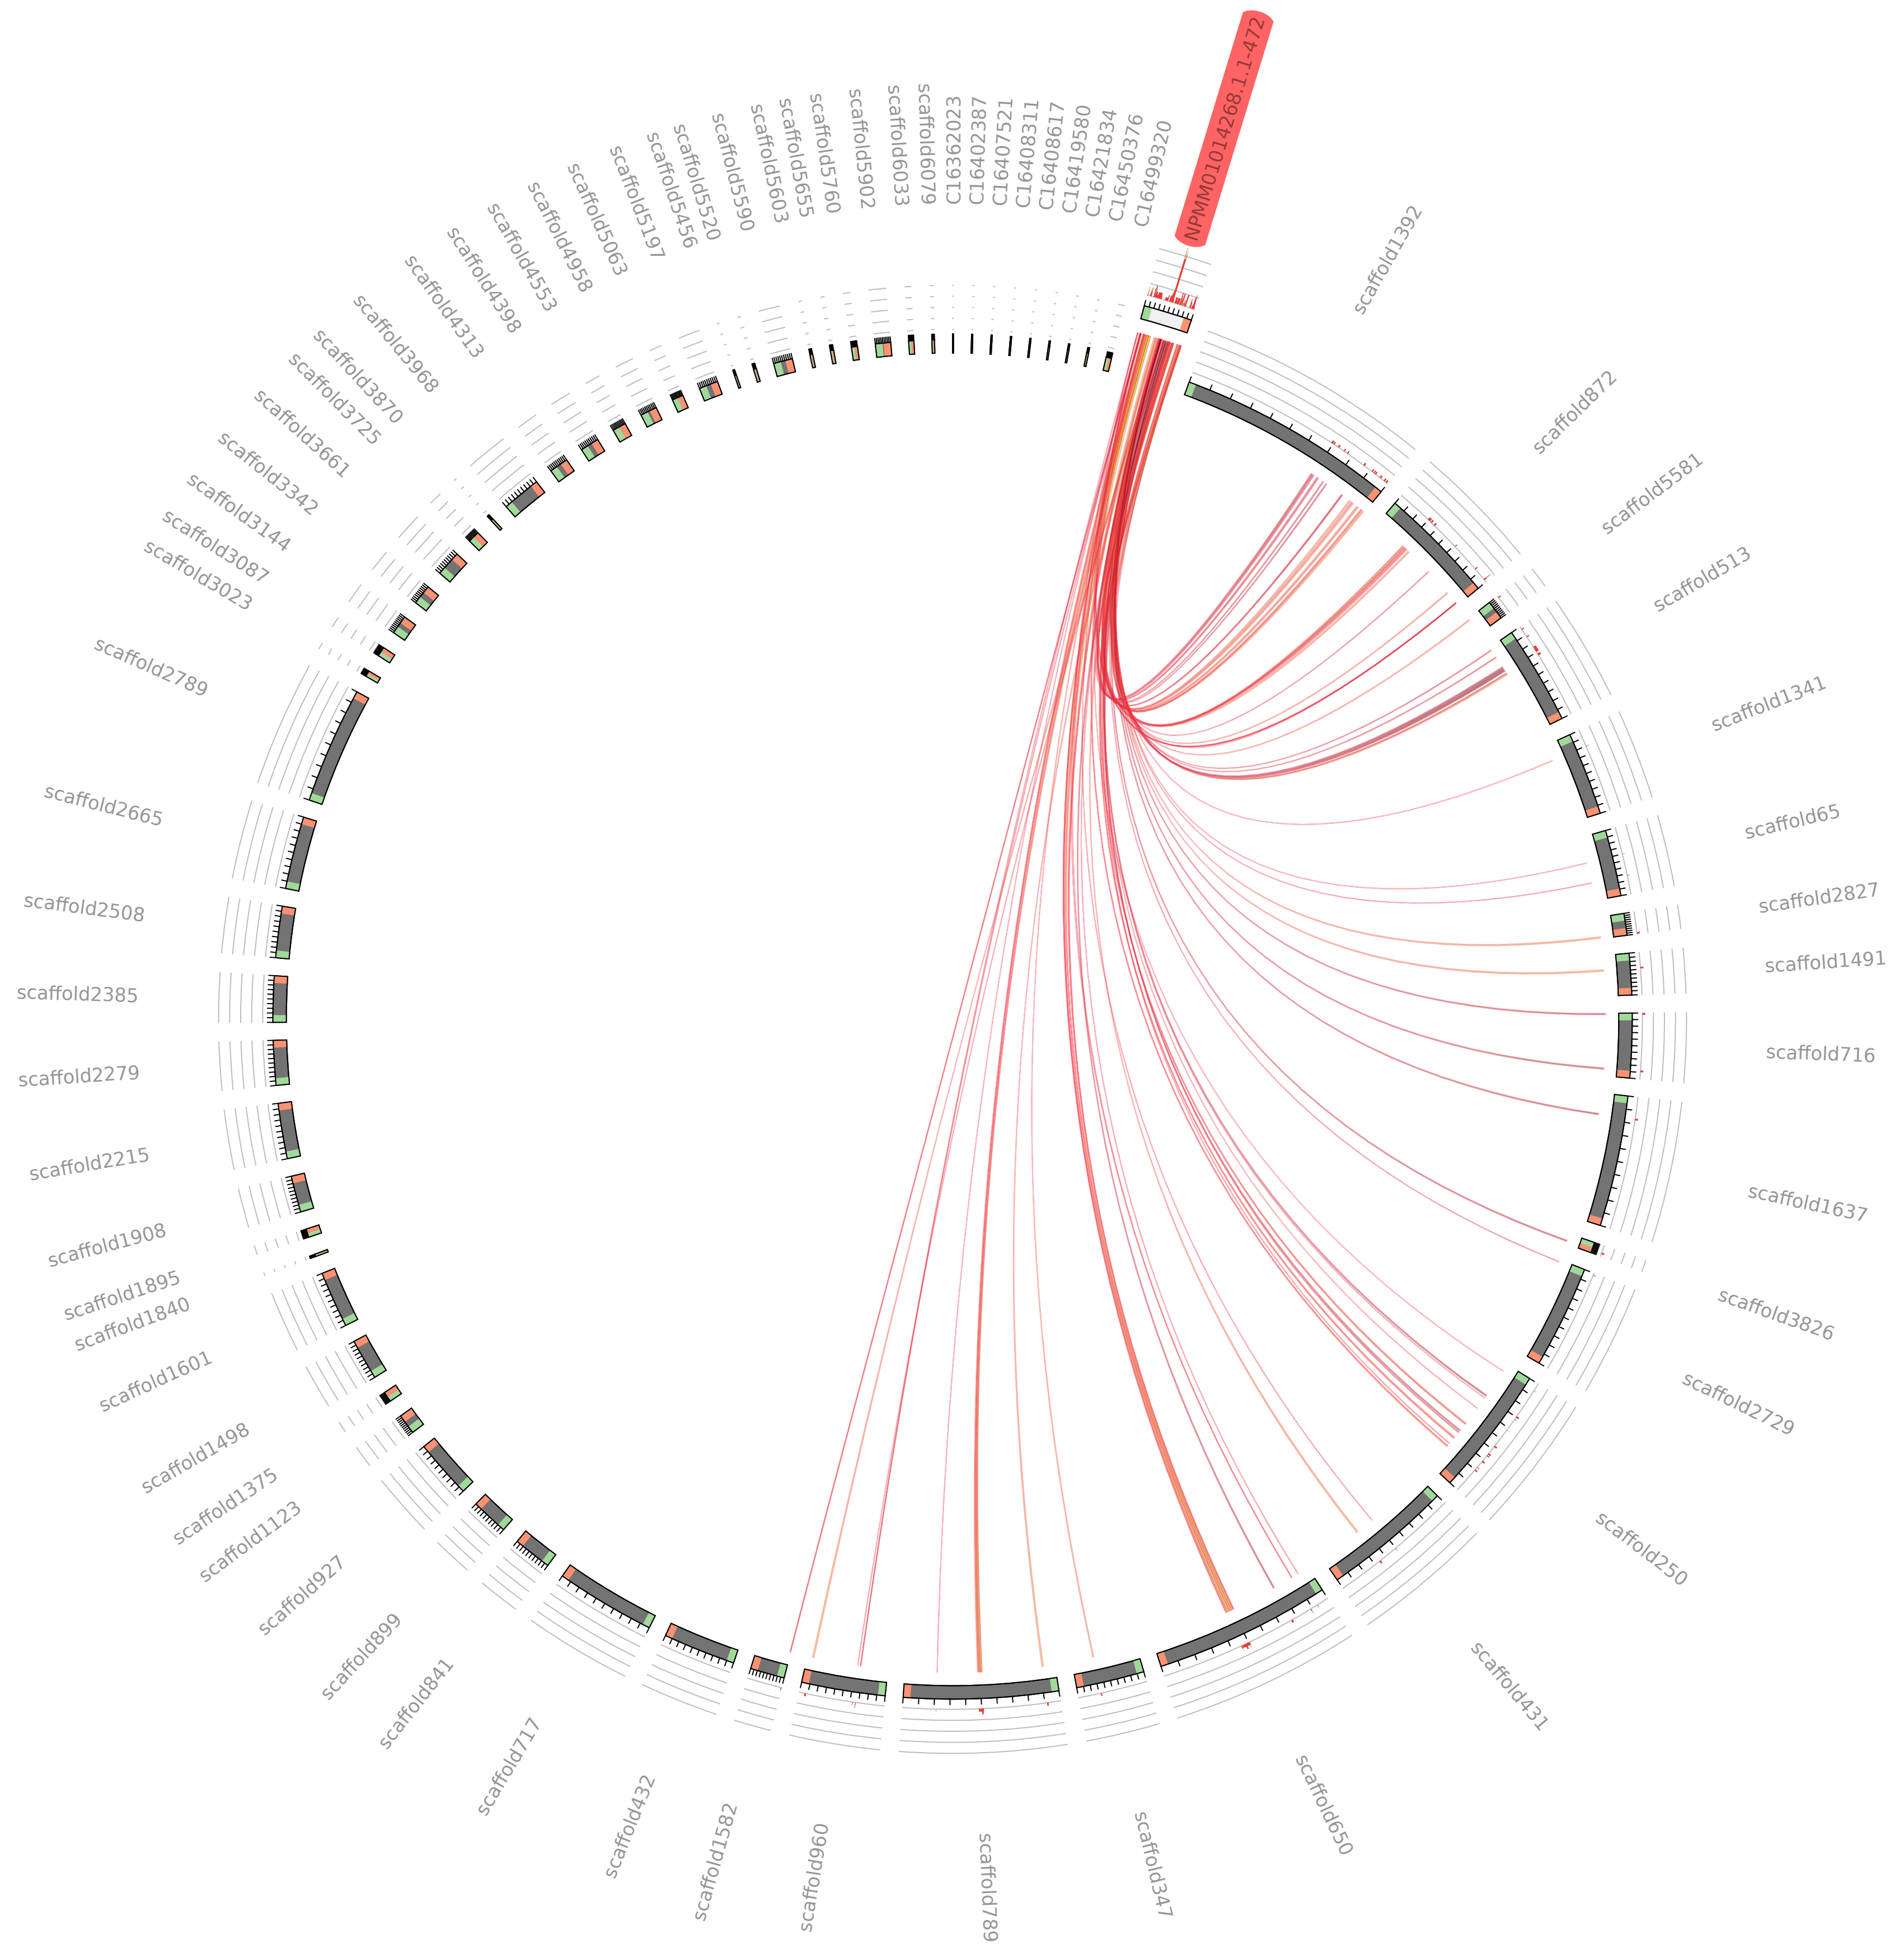

# Cytoplasmic Wolbachia
