# Supplementary material for: The first draft genomes of the ant Formica exsecta, and its Wolbachia endosymbiont reveal extensive gene transfer from endosymbiont to host
Source: Springer Nature journal article supplement (doi:10.1186/s12864-019-5665-6), 2019-04-16

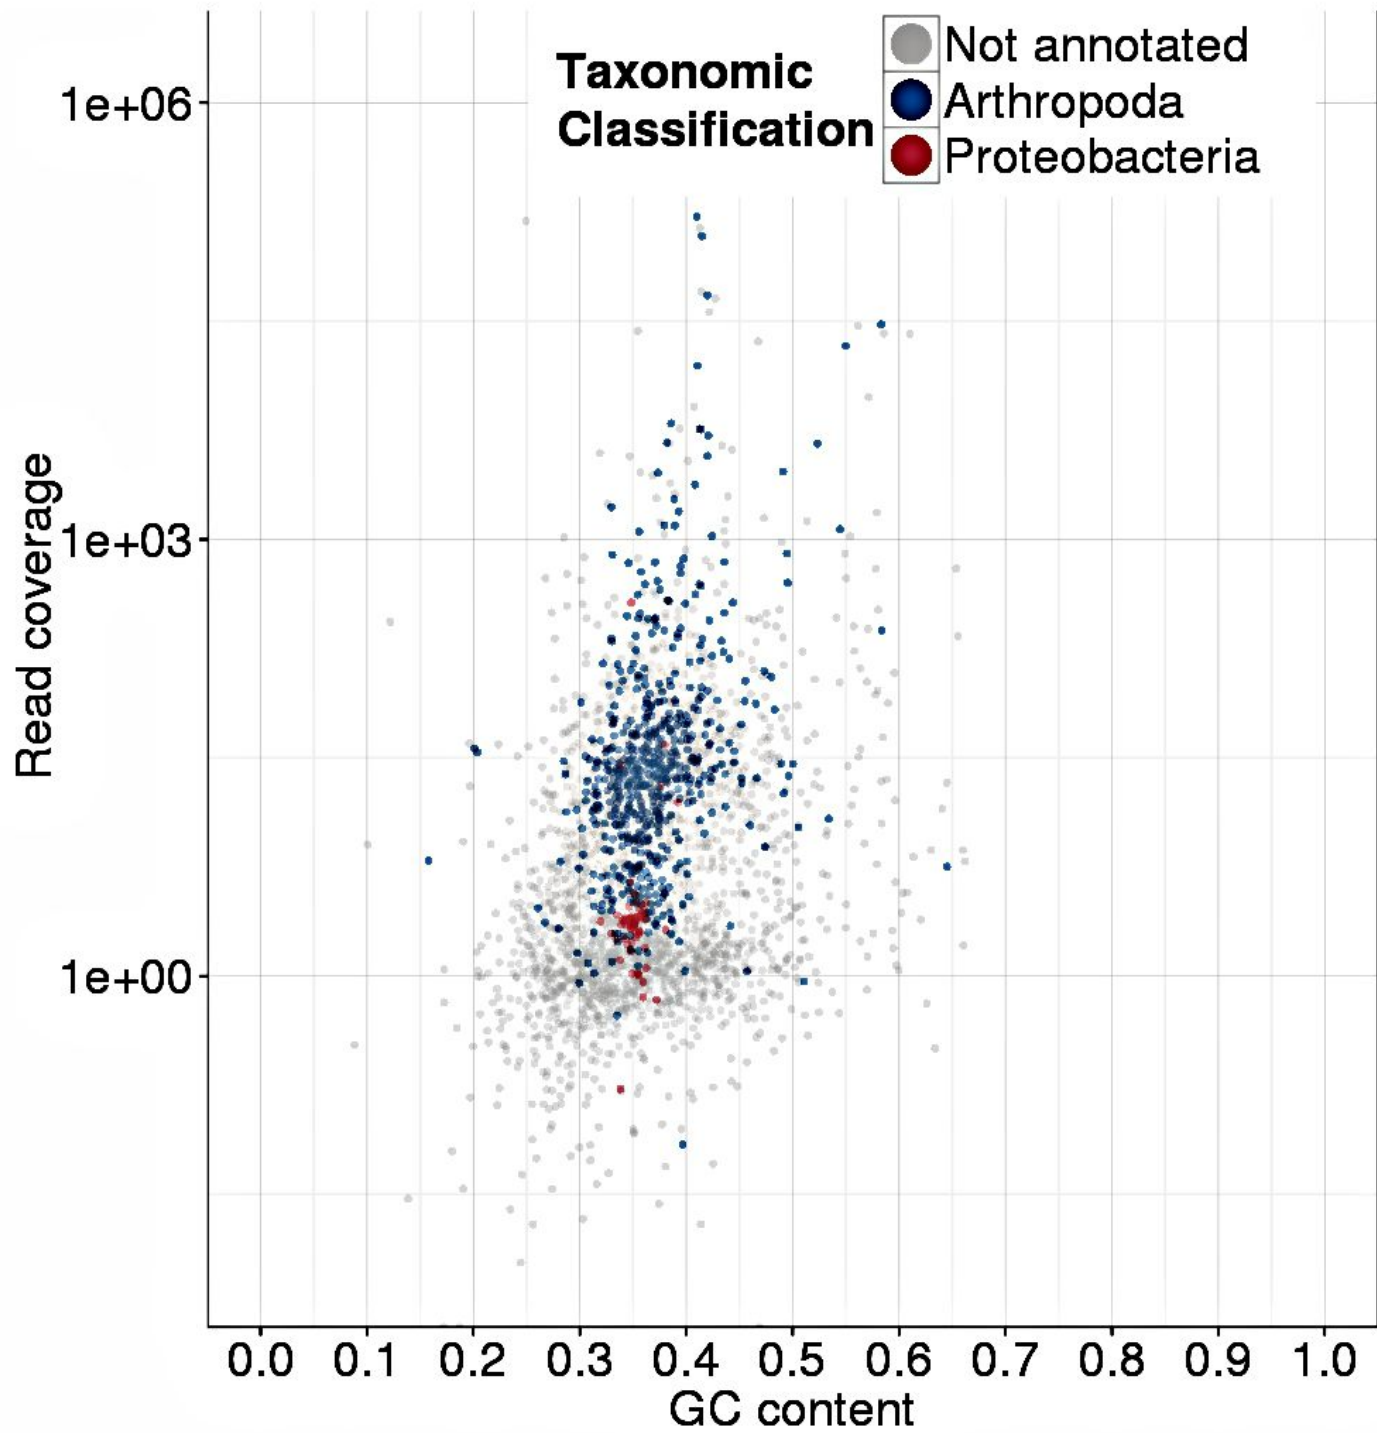

Supplement: MOESM13 [file 12864_2019_5665_MOESM13_ESM.pdf]
