# Supplementary material for: The first draft genomes of the ant Formica exsecta, and its Wolbachia endosymbiont reveal extensive gene transfer from endosymbiont to host
Source: BMC Genomics. 2019 Apr 16;20:301. doi: 10.1186/s12864-019-5665-6 (PMC6469114; doi:10.1186/s12864-019-5665-6)
Supplement: Supplementary file 1 — Table S1. Comparison of assembly statistics of the F. exsecta genome and 13 other published ant genomes. (XLSX 11 kb) [file 12864_2019_5665_MOESM1_ESM.xlsx]

## Sheet: Table S1
Table S1 : Comparison of assembly statistics of the F. exsecta genome and 13 other published ant genomes.
Genome Assembly	# contigs (>= 0 bp)	# contigs (>= 1000 bp)	# contigs (>= 5000 bp)	# contigs (>= 10000 bp)	# contigs (>= 25000 bp)	# contigs (>= 50000 bp)	Total length (>= 0 bp)	Total length (>= 1000 bp)	Total length (>= 5000 bp)	Total length (>= 10000 bp)	Total length (>= 25000 bp)	Total length (>= 50000 bp)	# contigs	Largest contig	Total length	GC (%)	N50	N75	L50	L75	# N's per 100 kbp
Acromyrmex echinatior	16221	1350	847	739	614	520	297521007	294791019	293815836	293063305	291042099	287576290	4479	5247136	295985138	33.65	1110580	475003	74	172	2507.37
Linepithema humile	3030	2944	1045	832	561	371	219806408	219764586	216774019	215183794	210773167	204100711	3022	7773598	219805570	37.66	1428586	449142	40	103	2973.35
Camponotus floridanus	24026	3818	1896	1399	925	684	234875860	229824240	225644152	222077071	214592423	206128746	11007	2671896	233182321	34.26	449423	165495	145	358	3561.00
Cardiocondyla obscurior	1854	1424	269	180	142	100	177892999	177607233	175170463	174514446	174023519	172418161	1854	8730060	177892999	40.80	3105814	1374768	15	37	2992.21
Cerapachys biroi	4579	1648	861	720	543	396	212825769	211537015	210113663	209118564	206100549	200799614	4579	4675608	212825769	41.68	1350650	484908	48	116	3360.28
Vollenhovia emeryi	13258	13258	2453	1274	594	357	287900827	287900827	265398110	257319272	246681029	238607051	13258	4813516	287900827	42.17	1346088	270665	61	166	6645.23
Wasmannia auropunctata	77788	9349	3013	2267	708	342	324120201	291590599	280515806	274405660	251061801	238929312	77780	10381176	324118828	38.66	1175369	36369	55	441	11864.64
Monomorium pharaonis	12136	11795	6643	4322	2409	1400	257976923	257930227	242725610	226390365	196163753	160298784	11823	657067	257944967	36.56	75377	26735	891	2305	230.97
Lasius niger	36804	27344	11577	6559	2083	452	236236391	229452098	191710192	156262324	86418772	30925605	36804	167361	236236391	37.08	17057	6818	3622	9088	15.64
Harpegnathos saltator	21347	3419	2376	1889	1133	712	296783122	292672314	290429138	286948428	274607894	259663776	9016	2276656	295199355	45.19	601965	228705	144	338	4036.46
Pogonomyrmex barbatus	4646	4584	909	750	615	505	235355905	235315209	230135143	228805937	226479704	222531798	4646	3904722	235355905	36.50	816513	334427	81	194	6494.00
Solenopsis invicta	69511	25682	2554	1982	1193	813	396024718	373958332	329601491	325998211	314480816	300905134	69511	6355204	396024718	36.22	558018	57944	139	741	10424.23
Formica exsecta	14617	3136	1684	1418	783	545	277719392	272830482	270342239	268541171	257216749	248806435	14617	7270168	277719392	36.00	997654	318356	73	185	12202.01
