# Supplementary material for: The first draft genomes of the ant Formica exsecta, and its Wolbachia endosymbiont reveal extensive gene transfer from endosymbiont to host
Source: BMC Genomics. 2019 Apr 16;20:301. doi: 10.1186/s12864-019-5665-6 (PMC6469114; doi:10.1186/s12864-019-5665-6)
Supplement: Supplementary file 2 — Table S2. List of genes specific to the Formicinae as identified by OrthoVenn. (XLSX 20 kb) [file 12864_2019_5665_MOESM2_ESM.xlsx]

## Sheet: Table S2
	Table S2: List of genes specific to the Formicinae as identified by OrthoVenn.
	Cluster	Gene in Clusters	Gene ID	Annotation Gene	Swissprot ID	Description	Gene ontology	E-Value
	cluster22	33	Formica_exsecta|FEX_0006815-mRNA1;Camponotus_floridanus|EFN70485.1;Lasis_niger|KMQ91596.1;Lasis_niger|KMQ84185.1;Lasis_niger|KMQ88181.1;Lasis_niger|KMQ88804.1;Lasis_niger|KMQ89100.1;Lasis_niger|KMQ89605.1;Lasis_niger|KMQ89606.1;Lasis_niger|KMQ89852.1;Lasis_niger|KMQ89878.1;Lasis_niger|KMQ90069.1;Lasis_niger|KMQ90096.1;Lasis_niger|KMQ90342.1;Lasis_niger|KMQ90526.1;Lasis_niger|KMQ91056.1;Lasis_nige…	Formica_exsecta|FEX_0006815-mRNA1	P04323	Retrovirus-related Pol polyprotein from transposon 17.6	GO:0004190; F:aspartic-type endopeptidase activity; IEA:UniProtKB-KW; GO:0004519; F:endonuclease activity; IEA:UniProtKB-KW; GO:0003676; F:nucleic acid binding; IEA:InterPro; GO:0003964; F:RNA-directed DNA polymerase activity; IEA:UniProtKB-KW; GO:0015074; P:DNA integration; IEA:InterPro	1.5e-75
	cluster26	27	Formica_exsecta|FEX_0012319-mRNA8;Formica_exsecta|FEX_0001646-mRNA3;Formica_exsecta|FEX_0001752-mRNA1;Formica_exsecta|FEX_0008907-mRNA4;Formica_exsecta|FEX_0009947-mRNA1;Formica_exsecta|FEX_0009948-mRNA1;Formica_exsecta|FEX_0012318-mRNA2;Formica_exsecta|FEX_0012331-mRNA1;Formica_exsecta|FEX_0011402-mRNA7;Formica_exsecta|FEX_0005252-mRNA2;Formica_exsecta|FEX_0009480-mRNA1;Formica_exsecta|FEX_00123…	Formica_exsecta|FEX_0012319-mRNA8	N/A	N/A	N/A	N/A
	cluster34	24	Formica_exsecta|FEX_0002493-mRNA1;Camponotus_floridanus|EFN65355.1;Lasis_niger|KMQ86829.1;Lasis_niger|KMQ86827.1;Lasis_niger|KMQ81686.1;Lasis_niger|KMQ81733.1;Lasis_niger|KMQ81900.1;Lasis_niger|KMQ81954.1;Lasis_niger|KMQ82021.1;Lasis_niger|KMQ82051.1;Lasis_niger|KMQ82216.1;Lasis_niger|KMQ82335.1;Lasis_niger|KMQ82402.1;Lasis_niger|KMQ82872.1;Lasis_niger|KMQ82972.1;Lasis_niger|KMQ83031.1;Lasis_nige…	Formica_exsecta|FEX_0002493-mRNA1	N/A	N/A	N/A	N/A
	cluster111	12	Formica_exsecta|FEX_0000529-mRNA1;Formica_exsecta|FEX_0000282-mRNA1;Formica_exsecta|FEX_0003682-mRNA1;Formica_exsecta|FEX_0012080-mRNA1;Formica_exsecta|FEX_0000810-mRNA1;Formica_exsecta|FEX_0010101-mRNA1;Lasis_niger|KMQ82657.1;Camponotus_floridanus|EFN61676.1;Lasis_niger|KMQ84975.1;Lasis_niger|KMQ82490.1;Lasis_niger|KMQ81625.1;Lasis_niger|KMQ81790.1;	Formica_exsecta|FEX_0000529-mRNA1	P34456	Uncharacterized protein F54H12.2	GO:0009186; P:deoxyribonucleoside diphosphate metabolic process; IEA:InterPro; GO:0055114; P:oxidation-reduction process; IEA:InterPro	2.4e-10
	cluster167	10	Formica_exsecta|FEX_0001650-mRNA1;Formica_exsecta|FEX_0000294-mRNA1;Formica_exsecta|FEX_0008500-mRNA1;Formica_exsecta|FEX_0008700-mRNA1;Formica_exsecta|FEX_0008723-mRNA1;Formica_exsecta|FEX_0010342-mRNA1;Formica_exsecta|FEX_0012847-mRNA1;Camponotus_floridanus|EFN67611.1;Lasis_niger|KMQ87938.1;Lasis_niger|KMQ83485.1;	Formica_exsecta|FEX_0001650-mRNA1	N/A	N/A	N/A	N/A
	cluster184	10	Formica_exsecta|FEX_0003929-mRNA1;Lasis_niger|KMQ83632.1;Lasis_niger|KMQ82875.1;Lasis_niger|KMQ89849.1;Camponotus_floridanus|EFN69769.1;Lasis_niger|KMQ93530.1;Lasis_niger|KMQ86396.1;Lasis_niger|KMQ86945.1;Lasis_niger|KMQ86961.1;Lasis_niger|KMQ87383.1;	Formica_exsecta|FEX_0003929-mRNA1	N/A	N/A	N/A	N/A
	cluster236	9	Formica_exsecta|FEX_0005213-mRNA1;Formica_exsecta|FEX_0002682-mRNA2;Formica_exsecta|FEX_0006993-mRNA1;Formica_exsecta|FEX_0006994-mRNA1;Formica_exsecta|FEX_0007392-mRNA1;Formica_exsecta|FEX_0006992-mRNA1;Formica_exsecta|FEX_0006991-mRNA3;Camponotus_floridanus|EFN64107.1;Lasis_niger|KMQ85030.1;	Formica_exsecta|FEX_0005213-mRNA1	N/A	N/A	N/A	N/A
	cluster299	9	Formica_exsecta|FEX_0011698-mRNA1;Lasis_niger|KMQ82655.1;Formica_exsecta|FEX_0006174-mRNA1;Camponotus_floridanus|EFN66003.1;Lasis_niger|KMQ85772.1;Lasis_niger|KMQ84595.1;Lasis_niger|KMQ90442.1;Camponotus_floridanus|EFN62284.1;Lasis_niger|KMQ81612.1;	Formica_exsecta|FEX_0011698-mRNA1	P03934	Transposable element Tc1 transposase	GO:0005634; C:nucleus; IEA:UniProtKB-KW; GO:0003677; F:DNA binding; IEA:UniProtKB-KW; GO:0004519; F:endonuclease activity; IEA:UniProtKB-KW; GO:0004803; F:transposase activity; IEA:InterPro; GO:0015074; P:DNA integration; IEA:UniProtKB-KW; GO:0006313; P:transposition, DNA-mediated; IEA:InterPro	3.9e-11
	cluster346	8	Formica_exsecta|FEX_0010583-mRNA6;Formica_exsecta|FEX_0006121-mRNA1;Formica_exsecta|FEX_0007343-mRNA1;Formica_exsecta|FEX_0000448-mRNA1;Camponotus_floridanus|EFN68824.1;Lasis_niger|KMQ84221.1;Formica_exsecta|FEX_0006542-mRNA1;Lasis_niger|KMQ82285.1;	Formica_exsecta|FEX_0010583-mRNA6	N/A	N/A	N/A	N/A
	cluster367	8	Formica_exsecta|FEX_0011274-mRNA1;Camponotus_floridanus|EFN63237.1;Lasis_niger|KMQ88731.1;Lasis_niger|KMQ83054.1;Lasis_niger|KMQ83777.1;Lasis_niger|KMQ87502.1;Camponotus_floridanus|EFN69937.1;Lasis_niger|KMQ81990.1;	Formica_exsecta|FEX_0011274-mRNA1	N/A	N/A	N/A	N/A
	cluster521	7	Formica_exsecta|FEX_0012095-mRNA1;Formica_exsecta|FEX_0011199-mRNA1;Formica_exsecta|FEX_0013112-mRNA1;Formica_exsecta|FEX_0005860-mRNA1;Formica_exsecta|FEX_0010977-mRNA1;Camponotus_floridanus|EFN66432.1;Lasis_niger|KMQ93548.1;	Formica_exsecta|FEX_0012095-mRNA1	N/A	N/A	N/A	N/A
	cluster542	7	Formica_exsecta|FEX_0013145-mRNA1;Camponotus_floridanus|EFN66011.1;Lasis_niger|KMQ87000.1;Camponotus_floridanus|EFN60708.1;Camponotus_floridanus|EFN73728.1;Camponotus_floridanus|EFN73729.1;Lasis_niger|KMQ82797.1;	Formica_exsecta|FEX_0013145-mRNA1	P34257	Transposable element Tc3 transposase	GO:0005634; C:nucleus; IEA:UniProtKB-KW; GO:0003677; F:DNA binding; IEA:UniProtKB-KW; GO:0004803; F:transposase activity; IEA:InterPro; GO:0015074; P:DNA integration; IEA:UniProtKB-KW; GO:0006313; P:transposition, DNA-mediated; IEA:InterPro	7e-21
	cluster706	7	Formica_exsecta|FEX_0000182-mRNA1;Camponotus_floridanus|EFN73369.1;Lasis_niger|KMQ83204.1;Camponotus_floridanus|EFN60999.1;Camponotus_floridanus|EFN63684.1;Camponotus_floridanus|EFN67910.1;Camponotus_floridanus|EFN62513.1;	Formica_exsecta|FEX_0000182-mRNA1	N/A	N/A	N/A	N/A
	cluster842	6	Formica_exsecta|FEX_0013253-mRNA1;Formica_exsecta|FEX_0004635-mRNA1;Formica_exsecta|FEX_0013054-mRNA1;Camponotus_floridanus|EFN63244.1;Lasis_niger|KMQ88177.1;Lasis_niger|KMQ86717.1;	Formica_exsecta|FEX_0013253-mRNA1	N/A	N/A	N/A	N/A
	cluster847	6	Formica_exsecta|FEX_0007404-mRNA1;Formica_exsecta|FEX_0008035-mRNA1;Camponotus_floridanus|EFN73989.1;Lasis_niger|KMQ93899.1;Camponotus_floridanus|EFN73990.1;Lasis_niger|KMQ87032.1;	Formica_exsecta|FEX_0007404-mRNA1	N/A	N/A	N/A	N/A
	cluster1023	6	Formica_exsecta|FEX_0012928-mRNA1;Lasis_niger|KMQ91279.1;Formica_exsecta|FEX_0003142-mRNA1;Camponotus_floridanus|EFN69706.1;Lasis_niger|KMQ86470.1;Lasis_niger|KMQ86989.1;	Formica_exsecta|FEX_0012928-mRNA1	Q03277	Retrovirus-related Pol polyprotein from type-1 retrotransposable element R1	GO:0004519; F:endonuclease activity; IEA:UniProtKB-KW; GO:0003964; F:RNA-directed DNA polymerase activity; IEA:UniProtKB-KW	1e-32
	cluster1184	6	Formica_exsecta|FEX_0013629-mRNA1;Lasis_niger|KMQ87425.1;Lasis_niger|KMQ85095.1;Lasis_niger|KMQ94799.1;Camponotus_floridanus|EFN64377.1;Camponotus_floridanus|EFN62561.1;	Formica_exsecta|FEX_0013629-mRNA1	N/A	N/A	N/A	N/A
	cluster1267	6	Formica_exsecta|FEX_0012292-mRNA1;Camponotus_floridanus|EFN71475.1;Lasis_niger|KMQ86739.1;Camponotus_floridanus|EFN64742.1;Camponotus_floridanus|EFN74757.1;Lasis_niger|KMQ85287.1;	Formica_exsecta|FEX_0012292-mRNA1	N/A	N/A	N/A	N/A
	cluster1308	6	Formica_exsecta|FEX_0002066-mRNA5;Camponotus_floridanus|EFN73991.1;Lasis_niger|KMQ97022.1;Camponotus_floridanus|EFN73992.1;Camponotus_floridanus|EFN73993.1;Camponotus_floridanus|EFN73994.1;	Formica_exsecta|FEX_0002066-mRNA5	N/A	N/A	N/A	N/A
	cluster1362	6	Formica_exsecta|FEX_0002521-mRNA1;Lasis_niger|KMQ87677.1;Formica_exsecta|FEX_0000176-mRNA1;Camponotus_floridanus|EFN61223.1;Lasis_niger|KMQ83497.1;Lasis_niger|KMQ85079.1;	Formica_exsecta|FEX_0002521-mRNA1	N/A	N/A	N/A	N/A
	cluster1799	5	Formica_exsecta|FEX_0006044-mRNA1;Camponotus_floridanus|EFN68582.1;Formica_exsecta|FEX_0012987-mRNA1;Lasis_niger|KMQ83563.1;Lasis_niger|KMQ83116.1;	Formica_exsecta|FEX_0006044-mRNA1	P34457	Putative uncharacterized transposon-derived protein F54H12.3	GO:0003676; F:nucleic acid binding; IEA:InterPro; GO:0015074; P:DNA integration; IEA:InterPro	4.1e-19
	cluster1898	5	Formica_exsecta|FEX_0000112-mRNA1;Camponotus_floridanus|EFN72423.1;Lasis_niger|KMQ87474.1;Formica_exsecta|FEX_0010328-mRNA1;Camponotus_floridanus|EFN71909.1;	Formica_exsecta|FEX_0000112-mRNA1	P16320	120.7 kDa protein in NOF-FB transposable element	GO:0005634; C:nucleus; IEA:UniProtKB-KW	1.5e-24
	cluster2104	5	Lasis_niger|KMQ85731.1;Formica_exsecta|FEX_0013011-mRNA1;Camponotus_floridanus|EFN66884.1;Lasis_niger|KMQ88695.1;Camponotus_floridanus|EFN66111.1;	Lasis_niger|KMQ85731.1	N/A	N/A	N/A	N/A
	cluster2315	5	Formica_exsecta|FEX_0010746-mRNA1;Camponotus_floridanus|EFN68268.1;Lasis_niger|KMQ84635.1;Camponotus_floridanus|EFN68266.1;Camponotus_floridanus|EFN68267.1;	Formica_exsecta|FEX_0010746-mRNA1	Q964R0	Cytochrome P450 6k1	GO:0005783; C:endoplasmic reticulum; IEA:UniProtKB-KW; GO:0016020; C:membrane; IEA:UniProtKB-KW; GO:0020037; F:heme binding; IEA:InterPro; GO:0005506; F:iron ion binding; IEA:InterPro; GO:0004497; F:monooxygenase activity; IEA:UniProtKB-KW; GO:0016705; F:oxidoreductase activity, acting on paired donors, with incorporation or reduction of molecular oxygen; IEA:InterPro	6.6e-106
	cluster2952	5	Formica_exsecta|FEX_0005828-mRNA1;Lasis_niger|KMQ82698.1;Lasis_niger|KMQ83534.1;Camponotus_floridanus|EFN63727.1;Camponotus_floridanus|EFN73558.1;	Formica_exsecta|FEX_0005828-mRNA1	N/A	N/A	N/A	N/A
	cluster3306	5	Formica_exsecta|FEX_0000063-mRNA1;Camponotus_floridanus|EFN65108.1;Lasis_niger|KMQ88696.1;Camponotus_floridanus|EFN67051.1;Camponotus_floridanus|EFN61586.1;	Formica_exsecta|FEX_0000063-mRNA1	N/A	N/A	N/A	N/A
	cluster4963	5	Formica_exsecta|FEX_0002918-mRNA1;Camponotus_floridanus|EFN66657.1;Camponotus_floridanus|EFN65357.1;Camponotus_floridanus|EFN64458.1;Lasis_niger|KMQ89256.1;	Formica_exsecta|FEX_0002918-mRNA1	N/A	N/A	N/A	N/A
	cluster5301	5	Formica_exsecta|FEX_0006066-mRNA1;Camponotus_floridanus|EFN74761.1;Lasis_niger|KMQ88718.1;Camponotus_floridanus|EFN64520.1;Camponotus_floridanus|EFN66018.1;	Formica_exsecta|FEX_0006066-mRNA1	N/A	N/A	N/A	N/A
	cluster5580	4	Formica_exsecta|FEX_0004001-mRNA1;Formica_exsecta|FEX_0004002-mRNA1;Lasis_niger|KMQ97282.1;Camponotus_floridanus|EFN68033.1;	Formica_exsecta|FEX_0004001-mRNA1	N/A	N/A	N/A	N/A
	cluster5596	4	Formica_exsecta|FEX_0011313-mRNA1;Formica_exsecta|FEX_0000312-mRNA1;Camponotus_floridanus|EFN70573.1;Lasis_niger|KMR04824.1;	Formica_exsecta|FEX_0011313-mRNA1	N/A	N/A	N/A	N/A
	cluster5603	4	Formica_exsecta|FEX_0012146-mRNA1;Formica_exsecta|FEX_0000361-mRNA1;Camponotus_floridanus|EFN61593.1;Lasis_niger|KMQ85029.1;	Formica_exsecta|FEX_0012146-mRNA1	N/A	N/A	N/A	N/A
	cluster5604	4	Formica_exsecta|FEX_0000667-mRNA1;Formica_exsecta|FEX_0009506-mRNA1;Camponotus_floridanus|EFN61566.1;Lasis_niger|KMQ87572.1;	Formica_exsecta|FEX_0000667-mRNA1	Q09575	Uncharacterized protein K02A2.6	GO:0003676; F:nucleic acid binding; IEA:InterPro; GO:0008270; F:zinc ion binding; IEA:InterPro; GO:0015074; P:DNA integration; IEA:InterPro	4.4e-13
	cluster5609	4	Formica_exsecta|FEX_0010246-mRNA1;Formica_exsecta|FEX_0013102-mRNA6;Camponotus_floridanus|EFN67943.1;Lasis_niger|KMQ87463.1;	Formica_exsecta|FEX_0010246-mRNA1	N/A	N/A	N/A	N/A
	cluster5611	4	Formica_exsecta|FEX_0002846-mRNA2;Formica_exsecta|FEX_0001179-mRNA1;Camponotus_floridanus|EFN71518.1;Lasis_niger|KMQ86808.1;	Formica_exsecta|FEX_0002846-mRNA2	N/A	N/A	N/A	N/A
	cluster5617	4	Formica_exsecta|FEX_0010270-mRNA1;Camponotus_floridanus|EFN69002.1;Lasis_niger|KMQ91625.1;Camponotus_floridanus|EFN64681.1;	Formica_exsecta|FEX_0010270-mRNA1	N/A	N/A	N/A	N/A
	cluster5674	4	Formica_exsecta|FEX_0000423-mRNA1;Lasis_niger|KMQ87643.1;Lasis_niger|KMQ87642.1;Camponotus_floridanus|EFN67348.1;	Formica_exsecta|FEX_0000423-mRNA1	N/A	N/A	N/A	N/A
	cluster5994	4	Formica_exsecta|FEX_0004497-mRNA1;Lasis_niger|KMQ91598.1;Lasis_niger|KMQ84145.1;Camponotus_floridanus|EFN70249.1;	Formica_exsecta|FEX_0004497-mRNA1	Q7M4F2	Endocuticle structural glycoprotein SgAbd-8	GO:0042302; F:structural constituent of cuticle; IEA:UniProtKB-KW	1.4e-15
	cluster6131	4	Formica_exsecta|FEX_0007109-mRNA1;Camponotus_floridanus|EFN71077.1;Lasis_niger|KMQ98046.1;Lasis_niger|KMR01577.1;	Formica_exsecta|FEX_0007109-mRNA1	N/A	N/A	N/A	N/A
	cluster6318	4	Formica_exsecta|FEX_0010069-mRNA1;Lasis_niger|KMR00605.1;Lasis_niger|KMQ92722.1;Camponotus_floridanus|EFN68071.1;	Formica_exsecta|FEX_0010069-mRNA1	P86732	Glycine, alanine and asparagine-rich protein	GO:0005576; C:extracellular region; IDA:UniProtKB	9.3e-30
	cluster6378	4	Formica_exsecta|FEX_0001546-mRNA1;Camponotus_floridanus|EFN73839.1;Lasis_niger|KMQ89200.1;Lasis_niger|KMQ89150.1;	Formica_exsecta|FEX_0001546-mRNA1	N/A	N/A	N/A	N/A
	cluster6435	4	Formica_exsecta|FEX_0008299-mRNA1;Lasis_niger|KMQ86904.1;Lasis_niger|KMQ87951.1;Camponotus_floridanus|EFN61746.1;	Formica_exsecta|FEX_0008299-mRNA1	Q8T391	Copia protein	GO:0004190; F:aspartic-type endopeptidase activity; IEA:UniProtKB-KW; GO:0005524; F:ATP binding; IEA:UniProtKB-KW; GO:0003676; F:nucleic acid binding; IEA:InterPro; GO:0008270; F:zinc ion binding; IEA:InterPro; GO:0015074; P:DNA integration; IEA:InterPro	4.3e-96
	cluster6505	4	Formica_exsecta|FEX_0012154-mRNA1;Camponotus_floridanus|EFN65463.1;Formica_exsecta|FEX_0013523-mRNA1;Lasis_niger|KMQ85296.1;	Formica_exsecta|FEX_0012154-mRNA1	Q7JQ07	Mariner Mos1 transposase	GO:0005634; C:nucleus; IEA:UniProtKB-KW; GO:0003677; F:DNA binding; IEA:UniProtKB-KW; GO:0004519; F:endonuclease activity; IEA:UniProtKB-KW; GO:0046872; F:metal ion binding; IEA:UniProtKB-KW; GO:0015074; P:DNA integration; IEA:UniProtKB-KW; GO:0006310; P:DNA recombination; IEA:UniProtKB-KW	8.3e-118
	cluster6897	4	Formica_exsecta|FEX_0005571-mRNA1;Camponotus_floridanus|EFN67081.1;Lasis_niger|KMQ84589.1;Camponotus_floridanus|EFN74758.1;	Formica_exsecta|FEX_0005571-mRNA1	N/A	N/A	N/A	N/A
	cluster6922	4	Formica_exsecta|FEX_0005265-mRNA1;Camponotus_floridanus|EFN62323.1;Lasis_niger|KMQ90868.1;Lasis_niger|KMQ91643.1;	Formica_exsecta|FEX_0005265-mRNA1	Q86AG7	Mevalonate kinase	GO:0005737; C:cytoplasm; IEA:UniProtKB-KW; GO:0005524; F:ATP binding; IEA:UniProtKB-KW; GO:0004496; F:mevalonate kinase activity; ISS:dictyBase; GO:0019287; P:isopentenyl diphosphate biosynthetic process, mevalonate pathway; IEA:UniProtKB-UniPathway; GO:0016310; P:phosphorylation; IC:dictyBase; GO:0016126; P:sterol biosynthetic process; IEA:UniProtKB-KW	6.5e-26
	cluster8838	3	Formica_exsecta|FEX_0001679-mRNA1;Camponotus_floridanus|EFN61017.1;Lasis_niger|KMQ96411.1;	Formica_exsecta|FEX_0001679-mRNA1	Q9NDC9	Lissencephaly-1 homolog {ECO:0000255|HAMAP-Rule:MF_03141}	GO:0005818; C:aster; IDA:WormBase; GO:0005938; C:cell cortex; IDA:WormBase; GO:0005737; C:cytoplasm; IDA:WormBase; GO:0000776; C:kinetochore; IDA:WormBase; GO:0005874; C:microtubule; IDA:WormBase; GO:0005875; C:microtubule associated complex; IEA:UniProtKB-HAMAP; GO:0048471; C:perinuclear region of cytoplasm; IDA:WormBase; GO:0051026; P:chiasma assembly; IMP:WormBase; GO:0009792; P:embryo develop…	8.8e-05
	cluster8842	3	Formica_exsecta|FEX_0012217-mRNA1;Lasis_niger|KMQ85719.1;Camponotus_floridanus|EFN72450.1;	Formica_exsecta|FEX_0012217-mRNA1	N/A	N/A	N/A	N/A
	cluster8845	3	Formica_exsecta|FEX_0008374-mRNA1;Camponotus_floridanus|EFN70042.1;Lasis_niger|KMQ96351.1;	Formica_exsecta|FEX_0008374-mRNA1	Q9VPT8	Cleavage and polyadenylation specificity factor subunit 4 {ECO:0000250|UniProtKB:O95639}	GO:0005847; C:mRNA cleavage and polyadenylation specificity factor complex; ISS:FlyBase; GO:0004521; F:endoribonuclease activity; IDA:FlyBase; GO:0003723; F:RNA binding; IEA:UniProtKB-KW; GO:0008270; F:zinc ion binding; IEA:InterPro; GO:0006379; P:mRNA cleavage; ISS:FlyBase; GO:0006378; P:mRNA polyadenylation; ISS:FlyBase; GO:0022008; P:neurogenesis; IMP:FlyBase; GO:0090502; P:RNA phosphodiester …	3.7e-111
	cluster8890	3	Formica_exsecta|FEX_0010534-mRNA1;Camponotus_floridanus|EFN70499.1;Lasis_niger|KMQ85351.1;	Formica_exsecta|FEX_0010534-mRNA1	N/A	N/A	N/A	N/A
	cluster8894	3	Formica_exsecta|FEX_0001835-mRNA1;Camponotus_floridanus|EFN72140.1;Lasis_niger|KMR04614.1;	Formica_exsecta|FEX_0001835-mRNA1	N/A	N/A	N/A	N/A
	cluster8895	3	Formica_exsecta|FEX_0011445-mRNA1;Camponotus_floridanus|EFN70870.1;Lasis_niger|KMQ90257.1;	Formica_exsecta|FEX_0011445-mRNA1	A1ZAI5	Putative fatty acyl-CoA reductase CG5065 {ECO:0000250|UniProtKB:Q922J9, ECO:0000312|EMBL:AAF57974.1}	GO:0016021; C:integral component of membrane; IEA:UniProtKB-KW; GO:0005778; C:peroxisomal membrane; ISM:FlyBase; GO:0005777; C:peroxisome; ISS:UniProtKB; GO:0080019; F:fatty-acyl-CoA reductase (alcohol-forming) activity; IEA:InterPro; GO:0050062; F:long-chain-fatty-acyl-CoA reductase activity; ISS:UniProtKB; GO:0006629; P:lipid metabolic process; IEA:UniProtKB-KW; GO:0010025; P:wax biosynthetic p…	1.7e-82
	cluster8896	3	Formica_exsecta|FEX_0002770-mRNA6;Camponotus_floridanus|EFN61971.1;Lasis_niger|KMQ92752.1;	Formica_exsecta|FEX_0002770-mRNA6	Q27450	Peptidyl-prolyl cis-trans isomerase 1	GO:0003755; F:peptidyl-prolyl cis-trans isomerase activity; IEA:UniProtKB-KW; GO:0006457; P:protein folding; IEA:UniProtKB-KW	5.3e-17
	cluster8905	3	Formica_exsecta|FEX_0011776-mRNA1;Camponotus_floridanus|EFN71835.1;Lasis_niger|KMQ94400.1;	Formica_exsecta|FEX_0011776-mRNA1	N/A	N/A	N/A	N/A
	cluster8929	3	Formica_exsecta|FEX_0010071-mRNA1;Camponotus_floridanus|EFN73080.1;Lasis_niger|KMR04512.1;	Formica_exsecta|FEX_0010071-mRNA1	P86732	Glycine, alanine and asparagine-rich protein	GO:0005576; C:extracellular region; IDA:UniProtKB	2.4e-15
	cluster8934	3	Formica_exsecta|FEX_0008160-mRNA1;Camponotus_floridanus|EFN65109.1;Lasis_niger|KMQ89977.1;	Formica_exsecta|FEX_0008160-mRNA1	P21328	RNA-directed DNA polymerase from mobile element jockey	GO:0003964; F:RNA-directed DNA polymerase activity; IEA:UniProtKB-KW	0.00032
	cluster8940	3	Formica_exsecta|FEX_0011193-mRNA1;Lasis_niger|KMQ85381.1;Camponotus_floridanus|EFN63480.1;	Formica_exsecta|FEX_0011193-mRNA1	N/A	N/A	N/A	N/A
	cluster8944	3	Formica_exsecta|FEX_0000202-mRNA1;Camponotus_floridanus|EFN67463.1;Lasis_niger|KMQ88418.1;	Formica_exsecta|FEX_0000202-mRNA1	N/A	N/A	N/A	N/A
	cluster8984	3	Formica_exsecta|FEX_0000132-mRNA1;Camponotus_floridanus|EFN69923.1;Lasis_niger|KMQ88077.1;	Formica_exsecta|FEX_0000132-mRNA1	N/A	N/A	N/A	N/A
	cluster8986	3	Formica_exsecta|FEX_0009605-mRNA1;Camponotus_floridanus|EFN65931.1;Lasis_niger|KMQ92358.1;	Formica_exsecta|FEX_0009605-mRNA1	N/A	N/A	N/A	N/A
	cluster8987	3	Formica_exsecta|FEX_0002761-mRNA1;Camponotus_floridanus|EFN64878.1;Lasis_niger|KMQ83230.1;	Formica_exsecta|FEX_0002761-mRNA1	N/A	N/A	N/A	N/A
	cluster8998	3	Formica_exsecta|FEX_0006537-mRNA4;Camponotus_floridanus|EFN65799.1;Lasis_niger|KMQ86083.1;	Formica_exsecta|FEX_0006537-mRNA4	N/A	N/A	N/A	N/A
	cluster9000	3	Formica_exsecta|FEX_0006064-mRNA1;Lasis_niger|KMQ83551.1;Camponotus_floridanus|EFN63418.1;	Formica_exsecta|FEX_0006064-mRNA1	N/A	N/A	N/A	N/A
	cluster9005	3	Formica_exsecta|FEX_0000514-mRNA1;Lasis_niger|KMQ85431.1;Camponotus_floridanus|EFN64678.1;	Formica_exsecta|FEX_0000514-mRNA1	Q54GV8	Uncharacterized transmembrane protein DDB_G0289901	GO:0016021; C:integral component of membrane; IEA:UniProtKB-KW	3.5e-57
	cluster9010	3	Formica_exsecta|FEX_0006113-mRNA2;Camponotus_floridanus|EFN64984.1;Lasis_niger|KMQ87932.1;	Formica_exsecta|FEX_0006113-mRNA2	Q95SX7	Probable RNA-directed DNA polymerase from transposon BS	GO:0003964; F:RNA-directed DNA polymerase activity; IMP:UniProtKB; GO:0006278; P:RNA-dependent DNA replication; IMP:GOC; GO:0006313; P:transposition, DNA-mediated; IMP:UniProtKB	2.8e-116
	cluster9018	3	Formica_exsecta|FEX_0002984-mRNA1;Camponotus_floridanus|EFN70327.1;Lasis_niger|KMQ94360.1;	Formica_exsecta|FEX_0002984-mRNA1	Q8T8R1	CCHC-type zinc finger protein CG3800	GO:0003676; F:nucleic acid binding; IEA:InterPro; GO:0008270; F:zinc ion binding; IEA:InterPro	1e-54
	cluster9020	3	Formica_exsecta|FEX_0010155-mRNA1;Camponotus_floridanus|EFN65037.1;Lasis_niger|KMQ90063.1;	Formica_exsecta|FEX_0010155-mRNA1	N/A	N/A	N/A	N/A
	cluster9030	3	Formica_exsecta|FEX_0009514-mRNA1;Camponotus_floridanus|EFN67152.1;Lasis_niger|KMQ85092.1;	Formica_exsecta|FEX_0009514-mRNA1	N/A	N/A	N/A	N/A
	cluster9047	3	Formica_exsecta|FEX_0001197-mRNA1;Camponotus_floridanus|EFN63504.1;Lasis_niger|KMQ93806.1;	Formica_exsecta|FEX_0001197-mRNA1	N/A	N/A	N/A	N/A
	cluster9055	3	Formica_exsecta|FEX_0010072-mRNA1;Camponotus_floridanus|EFN73081.1;Lasis_niger|KMR04513.1;	Formica_exsecta|FEX_0010072-mRNA1	P86732	Glycine, alanine and asparagine-rich protein	GO:0005576; C:extracellular region; IDA:UniProtKB	4.5e-17
	cluster9058	3	Formica_exsecta|FEX_0008883-mRNA1;Camponotus_floridanus|EFN69443.1;Lasis_niger|KMQ86586.1;	Formica_exsecta|FEX_0008883-mRNA1	Q964R0	Cytochrome P450 6k1	GO:0005783; C:endoplasmic reticulum; IEA:UniProtKB-KW; GO:0016020; C:membrane; IEA:UniProtKB-KW; GO:0020037; F:heme binding; IEA:InterPro; GO:0005506; F:iron ion binding; IEA:InterPro; GO:0004497; F:monooxygenase activity; IEA:UniProtKB-KW; GO:0016705; F:oxidoreductase activity, acting on paired donors, with incorporation or reduction of molecular oxygen; IEA:InterPro	3.8e-47
	cluster9060	3	Formica_exsecta|FEX_0011773-mRNA1;Camponotus_floridanus|EFN74142.1;Lasis_niger|KMQ97036.1;	Formica_exsecta|FEX_0011773-mRNA1	P34479	Putative amino acid permease F59B2.2	GO:0016021; C:integral component of membrane; IEA:UniProtKB-KW; GO:0006865; P:amino acid transport; IEA:UniProtKB-KW	1.7e-36
	cluster9071	3	Formica_exsecta|FEX_0003066-mRNA4;Camponotus_floridanus|EFN67157.1;Lasis_niger|KMQ92235.1;	Formica_exsecta|FEX_0003066-mRNA4	P0CD60	FERM domain-containing protein C	GO:0005856; C:cytoskeleton; IEA:InterPro	0.00017
	cluster9080	3	Formica_exsecta|FEX_0003681-mRNA1;Camponotus_floridanus|EFN71881.1;Lasis_niger|KMQ94072.1;	Formica_exsecta|FEX_0003681-mRNA1	Q9W4K2	Uncharacterized protein CG3556	GO:0005576; C:extracellular region; IEA:UniProtKB-KW; GO:0031419; F:cobalamin binding; IEA:InterPro; GO:0015889; P:cobalamin transport; IEA:InterPro	1.4e-07
	cluster9096	3	Formica_exsecta|FEX_0000343-mRNA1;Camponotus_floridanus|EFN71782.1;Lasis_niger|KMQ86241.1;	Formica_exsecta|FEX_0000343-mRNA1	N/A	N/A	N/A	N/A
	cluster9106	3	Formica_exsecta|FEX_0010610-mRNA1;Camponotus_floridanus|EFN67861.1;Lasis_niger|KMQ91942.1;	Formica_exsecta|FEX_0010610-mRNA1	N/A	N/A	N/A	N/A
	cluster9110	3	Formica_exsecta|FEX_0003895-mRNA1;Camponotus_floridanus|EFN65928.1;Lasis_niger|KMQ96666.1;	Formica_exsecta|FEX_0003895-mRNA1	P15619	Serendipity locus protein H-1	GO:0005634; C:nucleus; IDA:UniProtKB; GO:0003677; F:DNA binding; IDA:UniProtKB; GO:0046872; F:metal ion binding; IEA:UniProtKB-KW; GO:0007275; P:multicellular organismal development; IEA:UniProtKB-KW; GO:0006355; P:regulation of transcription, DNA-templated; IEA:UniProtKB-KW; GO:0006351; P:transcription, DNA-templated; IEA:UniProtKB-KW	5.3e-12
	cluster9122	3	Formica_exsecta|FEX_0009822-mRNA1;Camponotus_floridanus|EFN72592.1;Lasis_niger|KMR05014.1;	Formica_exsecta|FEX_0009822-mRNA1	G5EGN2	Delta(9)-fatty-acid desaturase fat-6	GO:0030176; C:integral component of endoplasmic reticulum membrane; ISS:WormBase; GO:0004768; F:stearoyl-CoA 9-desaturase activity; IGI:WormBase; GO:0045087; P:innate immune response; IEP:WormBase; GO:0042759; P:long-chain fatty acid biosynthetic process; IGI:WormBase; GO:0007275; P:multicellular organismal development; IGI:WormBase	1.5e-36
	cluster9123	3	Formica_exsecta|FEX_0006322-mRNA1;Camponotus_floridanus|EFN65072.1;Lasis_niger|KMQ89935.1;	Formica_exsecta|FEX_0006322-mRNA1	P45589	Flexible cuticle protein 12	GO:0042302; F:structural constituent of cuticle; IEA:UniProtKB-KW	1.5e-20
	cluster9129	3	Formica_exsecta|FEX_0001229-mRNA7;Camponotus_floridanus|EFN60831.1;Lasis_niger|KMQ89399.1;	Formica_exsecta|FEX_0001229-mRNA7	P13080	Probable maltase	GO:0004558; F:alpha-1,4-glucosidase activity; IEA:UniProtKB-EC; GO:0043169; F:cation binding; IEA:InterPro; GO:0032450; F:maltose alpha-glucosidase activity; IEA:UniProtKB-EC; GO:0005975; P:carbohydrate metabolic process; IEA:InterPro	1.7e-39
	cluster9130	3	Formica_exsecta|FEX_0001013-mRNA1;Camponotus_floridanus|EFN73600.1;Lasis_niger|KMQ96062.1;	Formica_exsecta|FEX_0001013-mRNA1	Q54SZ6	Putative uncharacterized protein DDB_G0282133	N/A	7.6e-27
	cluster9138	3	Formica_exsecta|FEX_0008577-mRNA1;Camponotus_floridanus|EFN69022.1;Lasis_niger|KMR03008.1;	Formica_exsecta|FEX_0008577-mRNA1	N/A	N/A	N/A	N/A
	cluster9143	3	Formica_exsecta|FEX_0006285-mRNA2;Camponotus_floridanus|EFN67442.1;Lasis_niger|KMR05116.1;	Formica_exsecta|FEX_0006285-mRNA2	N/A	N/A	N/A	N/A
	cluster9151	3	Formica_exsecta|FEX_0003779-mRNA1;Camponotus_floridanus|EFN65567.1;Lasis_niger|KMQ95641.1;	Formica_exsecta|FEX_0003779-mRNA1	P98163	Putative vitellogenin receptor	GO:0030135; C:coated vesicle; IDA:FlyBase; GO:0031410; C:cytoplasmic vesicle; IDA:FlyBase; GO:0016021; C:integral component of membrane; IEA:UniProtKB-KW; GO:0005886; C:plasma membrane; IEA:UniProtKB-KW; GO:0005509; F:calcium ion binding; IEA:InterPro; GO:0008196; F:vitellogenin receptor activity; ISS:FlyBase; GO:0048477; P:oogenesis; NAS:FlyBase; GO:0006898; P:receptor-mediated endocytosis; ISS:…	1.6e-104
	cluster9163	3	Formica_exsecta|FEX_0013590-mRNA5;Camponotus_floridanus|EFN61921.1;Lasis_niger|KMQ95744.1;	Formica_exsecta|FEX_0013590-mRNA5	Q94361	E3 SUMO-protein ligase gei-17	GO:0001085; F:RNA polymerase II transcription factor binding; IPI:WormBase; GO:0019789; F:SUMO ligase activity; IDA:WormBase; GO:0008270; F:zinc ion binding; IEA:InterPro; GO:0006974; P:cellular response to DNA damage stimulus; IMP:WormBase; GO:0006281; P:DNA repair; IEA:UniProtKB-KW; GO:0016925; P:protein sumoylation; IDA:WormBase	2.8e-13
	cluster9164	3	Formica_exsecta|FEX_0009120-mRNA1;Lasis_niger|KMQ83969.1;Camponotus_floridanus|EFN62150.1;	Formica_exsecta|FEX_0009120-mRNA1	O46108	Lipase 3	GO:0016788; F:hydrolase activity, acting on ester bonds; IEA:InterPro; GO:0016042; P:lipid catabolic process; IEA:UniProtKB-KW	3e-52
	cluster9165	3	Formica_exsecta|FEX_0007008-mRNA1;Camponotus_floridanus|EFN69515.1;Lasis_niger|KMQ93691.1;	Formica_exsecta|FEX_0007008-mRNA1	Q9NBX5	Nucleic-acid-binding protein from transposon X-element	GO:0019013; C:viral nucleocapsid; NAS:UniProtKB; GO:0003676; F:nucleic acid binding; IEA:InterPro; GO:0008270; F:zinc ion binding; IEA:InterPro; GO:0006313; P:transposition, DNA-mediated; IMP:UniProtKB	5.9e-28
	cluster9171	3	Formica_exsecta|FEX_0006034-mRNA1;Camponotus_floridanus|EFN60435.1;Lasis_niger|KMR04498.1;	Formica_exsecta|FEX_0006034-mRNA1	Q17103	Myc protein	GO:0005634; C:nucleus; IEA:UniProtKB-KW; GO:0003677; F:DNA binding; IEA:UniProtKB-KW; GO:0003700; F:sequence-specific DNA binding transcription factor activity; IEA:InterPro; GO:0006351; P:transcription, DNA-templated; IEA:UniProtKB-KW	1.8e-14
	cluster9183	3	Formica_exsecta|FEX_0001447-mRNA1;Camponotus_floridanus|EFN74244.1;Lasis_niger|KMQ90445.1;	Formica_exsecta|FEX_0001447-mRNA1	N/A	N/A	N/A	N/A
	cluster9204	3	Formica_exsecta|FEX_0005867-mRNA1;Camponotus_floridanus|EFN61764.1;Lasis_niger|KMQ90555.1;	Formica_exsecta|FEX_0005867-mRNA1	N/A	N/A	N/A	N/A
	cluster9229	3	Formica_exsecta|FEX_0001878-mRNA1;Camponotus_floridanus|EFN71457.1;Lasis_niger|KMR05033.1;	Formica_exsecta|FEX_0001878-mRNA1	Q24573	Protein dead ringer	GO:0005634; C:nucleus; IDA:UniProtKB; GO:0003677; F:DNA binding; IDA:UniProtKB; GO:0070491; F:repressing transcription factor binding; IPI:FlyBase; GO:0003700; F:sequence-specific DNA binding transcription factor activity; NAS:FlyBase; GO:0000976; F:transcription regulatory region sequence-specific DNA binding; IDA:FlyBase; GO:0009952; P:anterior/posterior pattern specification; IMP:FlyBase; GO:0…	5.1e-18
	cluster9239	3	Formica_exsecta|FEX_0012724-mRNA1;Camponotus_floridanus|EFN67661.1;Lasis_niger|KMQ98989.1;	Formica_exsecta|FEX_0012724-mRNA1	Q54DL6	SET and MYND domain-containing protein DDB_G0292140	GO:0046872; F:metal ion binding; IEA:UniProtKB-KW; GO:0008168; F:methyltransferase activity; IEA:UniProtKB-KW	1.6e-18
	cluster9251	3	Formica_exsecta|FEX_0008174-mRNA1;Camponotus_floridanus|EFN64051.1;Lasis_niger|KMQ91808.1;	Formica_exsecta|FEX_0008174-mRNA1	N/A	N/A	N/A	N/A
	cluster9255	3	Formica_exsecta|FEX_0008286-mRNA1;Camponotus_floridanus|EFN63218.1;Lasis_niger|KMQ93350.1;	Formica_exsecta|FEX_0008286-mRNA1	N/A	N/A	N/A	N/A
	cluster9258	3	Formica_exsecta|FEX_0007349-mRNA1;Lasis_niger|KMQ85168.1;Camponotus_floridanus|EFN62939.1;	Formica_exsecta|FEX_0007349-mRNA1	Q05118	Retrovirus-related Pol polyprotein from type-1 retrotransposable element R2	GO:0004519; F:endonuclease activity; IEA:UniProtKB-KW; GO:0003964; F:RNA-directed DNA polymerase activity; IEA:UniProtKB-KW	2.3e-12
	cluster9259	3	Formica_exsecta|FEX_0012081-mRNA1;Lasis_niger|KMQ91923.1;Camponotus_floridanus|EFN61754.1;	Formica_exsecta|FEX_0012081-mRNA1	N/A	N/A	N/A	N/A
	cluster9265	3	Formica_exsecta|FEX_0005182-mRNA1;Camponotus_floridanus|EFN69561.1;Lasis_niger|KMQ96495.1;	Formica_exsecta|FEX_0005182-mRNA1	Q555V7	VID27-like protein	N/A	0.0002
	cluster9266	3	Formica_exsecta|FEX_0007170-mRNA2;Camponotus_floridanus|EFN70126.1;Lasis_niger|KMQ95014.1;	Formica_exsecta|FEX_0007170-mRNA2	Q29IG6	RNA-binding protein pno1	GO:0005730; C:nucleolus; ISS:UniProtKB; GO:0003723; F:RNA binding; IEA:UniProtKB-KW	3.3e-83
	cluster9293	3	Formica_exsecta|FEX_0006616-mRNA1;Camponotus_floridanus|EFN63234.1;Lasis_niger|KMQ84408.1;	Formica_exsecta|FEX_0006616-mRNA1	N/A	N/A	N/A	N/A
	cluster9309	3	Formica_exsecta|FEX_0011670-mRNA1;Camponotus_floridanus|EFN63759.1;Lasis_niger|KMQ86603.1;	Formica_exsecta|FEX_0011670-mRNA1	N/A	N/A	N/A	N/A
	cluster9328	3	Formica_exsecta|FEX_0005475-mRNA1;Camponotus_floridanus|EFN61269.1;Lasis_niger|KMQ87689.1;	Formica_exsecta|FEX_0005475-mRNA1	N/A	N/A	N/A	N/A
	cluster9333	3	Formica_exsecta|FEX_0012841-mRNA2;Camponotus_floridanus|EFN62822.1;Lasis_niger|KMQ93344.1;	Formica_exsecta|FEX_0012841-mRNA2	Q9VQC4	Glycerate kinase	GO:0005737; C:cytoplasm; ISS:UniProtKB; GO:0005524; F:ATP binding; IEA:UniProtKB-KW; GO:0008887; F:glycerate kinase activity; ISS:UniProtKB; GO:0006468; P:protein phosphorylation; ISS:UniProtKB	6.1e-56
	cluster9346	3	Formica_exsecta|FEX_0011279-mRNA1;Camponotus_floridanus|EFN72529.1;Lasis_niger|KMQ83283.1;	Formica_exsecta|FEX_0011279-mRNA1	Q09575	Uncharacterized protein K02A2.6	GO:0003676; F:nucleic acid binding; IEA:InterPro; GO:0008270; F:zinc ion binding; IEA:InterPro; GO:0015074; P:DNA integration; IEA:InterPro	8.8e-18
	cluster9395	3	Formica_exsecta|FEX_0002852-mRNA1;Lasis_niger|KMQ85867.1;Camponotus_floridanus|EFN66741.1;	Formica_exsecta|FEX_0002852-mRNA1	N/A	N/A	N/A	N/A
