# Supplementary material for: The first draft genomes of the ant Formica exsecta, and its Wolbachia endosymbiont reveal extensive gene transfer from endosymbiont to host
Source: BMC Genomics. 2019 Apr 16;20:301. doi: 10.1186/s12864-019-5665-6 (PMC6469114; doi:10.1186/s12864-019-5665-6)
Supplement: Supplementary file 3 — Table S3. List of species-specific genes in F. exsecta, as identified by OrthoVenn. (XLSX 24 kb) [file 12864_2019_5665_MOESM3_ESM.xlsx]

## Sheet: Table S3
Table S3: List of species-specific genes in F. exsecta, as identified by OrthoVenn.
Cluster_name	Number of Genes	ID of Formica exsecta Protein	Gene	Swissprot ID	Swissprot Name	GO	E-value
cluster5584	4	FEX_0000316-mRNA1;FEX_0006106-mRNA1;FEX_0008026-mRNA1;FEX_0010281-mRNA1;	FEX_0000316-mRNA1	P10394	Retrovirus-related Pol polyprotein from transposon 412	GO:0004190; F:aspartic-type endopeptidase activity; IEA:UniProtKB-KW; GO:0004519; F:endonuclease activity; IEA:UniProtKB-KW; GO:0003676; F:nucleic acid binding; IEA:InterPro; GO:0003964; F:RNA-directed DNA polymerase activity; IEA:UniProtKB-KW; GO:0015074; P:DNA integration; IEA:InterPro	1.5e-54
cluster8816	3	FEX_0009288-mRNA1;FEX_0003267-mRNA1;FEX_0006684-mRNA1;	FEX_0009288-mRNA1	P10394	Retrovirus-related Pol polyprotein from transposon 412	GO:0004190; F:aspartic-type endopeptidase activity; IEA:UniProtKB-KW; GO:0004519; F:endonuclease activity; IEA:UniProtKB-KW; GO:0003676; F:nucleic acid binding; IEA:InterPro; GO:0003964; F:RNA-directed DNA polymerase activity; IEA:UniProtKB-KW; GO:0015074; P:DNA integration; IEA:InterPro	8.4e-50
cluster10884	2	FEX_0008721-mRNA1;FEX_0007899-mRNA1;	FEX_0008721-mRNA1	P10394	Retrovirus-related Pol polyprotein from transposon 412	GO:0004190; F:aspartic-type endopeptidase activity; IEA:UniProtKB-KW; GO:0004519; F:endonuclease activity; IEA:UniProtKB-KW; GO:0003676; F:nucleic acid binding; IEA:InterPro; GO:0003964; F:RNA-directed DNA polymerase activity; IEA:UniProtKB-KW; GO:0015074; P:DNA integration; IEA:InterPro	4.4e-38
cluster10951	2	FEX_0008728-mRNA1;FEX_0013517-mRNA1;	FEX_0008728-mRNA1	P10394	Retrovirus-related Pol polyprotein from transposon 412	GO:0004190; F:aspartic-type endopeptidase activity; IEA:UniProtKB-KW; GO:0004519; F:endonuclease activity; IEA:UniProtKB-KW; GO:0003676; F:nucleic acid binding; IEA:InterPro; GO:0003964; F:RNA-directed DNA polymerase activity; IEA:UniProtKB-KW; GO:0015074; P:DNA integration; IEA:InterPro	2.7e-13
cluster10866	2	FEX_0001579-mRNA1;FEX_0012949-mRNA1;	FEX_0001579-mRNA1	P16320	120.7 kDa protein in NOF-FB transposable element	GO:0005634; C:nucleus; IEA:UniProtKB-KW	1.6e-54
cluster10897	2	FEX_0010680-mRNA1;FEX_0010111-mRNA1;	FEX_0010680-mRNA1	P16425	Putative 115 kDa protein in type-1 retrotransposable element R1DM	NA	6.9e-16
cluster10900	2	FEX_0003678-mRNA1;FEX_0011453-mRNA1;	FEX_0003678-mRNA1	P16425	Putative 115 kDa protein in type-1 retrotransposable element R1DM	NA	2.2e-63
cluster10920	2	FEX_0000277-mRNA1;FEX_0002825-mRNA1;	FEX_0000277-mRNA1	P21329	RNA-directed DNA polymerase from mobile element jockey	GO:0003964; F:RNA-directed DNA polymerase activity; IEA:UniProtKB-KW	4.7e-13
cluster510	7	FEX_0006194-mRNA1;FEX_0003284-mRNA1;FEX_0006495-mRNA1;FEX_0008029-mRNA1;FEX_0009386-mRNA1;FEX_0012322-mRNA1;FEX_0011240-mRNA1;	FEX_0006194-mRNA1	P34457	Putative uncharacterized transposon-derived protein F54H12.3	GO:0003676; F:nucleic acid binding; IEA:InterPro; GO:0015074; P:DNA integration; IEA:InterPro	3.2e-18
cluster1555	5	FEX_0010332-mRNA1;FEX_0000350-mRNA1;FEX_0000454-mRNA1;FEX_0002922-mRNA1;FEX_0005468-mRNA1;	FEX_0010332-mRNA1	P40631	Micronuclear linker histone polyprotein	GO:0005694; C:chromosome; IEA:UniProtKB-KW; GO:0005634; C:nucleus; IEA:UniProtKB-KW; GO:0003677; F:DNA binding; IEA:UniProtKB-KW	0.0067
cluster10895	2	FEX_0012892-mRNA1;FEX_0012891-mRNA1;	FEX_0012892-mRNA1	P91685	Metabotropic glutamate receptor	GO:0016021; C:integral component of membrane; ISS:FlyBase; GO:0005887; C:integral component of plasma membrane; IDA:FlyBase; GO:0045121; C:membrane raft; IDA:FlyBase; GO:0005886; C:plasma membrane; IDA:FlyBase; GO:0042734; C:presynaptic membrane; IBA:RefGenome; GO:0015485; F:cholesterol binding; IDA:FlyBase; GO:0004930; F:G-protein coupled receptor activity; ISS:FlyBase; GO:0016595; F:glutamate b…	1.2e-56
cluster10922	2	FEX_0006667-mRNA1;FEX_0009694-mRNA1;	FEX_0006667-mRNA1	Q03278	Retrovirus-related Pol polyprotein from type-1 retrotransposable element R2	GO:0004519; F:endonuclease activity; IEA:UniProtKB-KW; GO:0046872; F:metal ion binding; IEA:UniProtKB-KW; GO:0003964; F:RNA-directed DNA polymerase activity; IEA:UniProtKB-KW	5.3e-27
cluster238	9	FEX_0013432-mRNA1;FEX_0000801-mRNA1;FEX_0000806-mRNA1;FEX_0001248-mRNA1;FEX_0003135-mRNA3;FEX_0013430-mRNA1;FEX_0013433-mRNA1;FEX_0013436-mRNA1;FEX_0003087-mRNA1;	FEX_0013432-mRNA1	Q09165	Mesocentin	GO:0005578; C:proteinaceous extracellular matrix; IEA:UniProtKB-KW; GO:0005509; F:calcium ion binding; IEA:InterPro; GO:0003824; F:catalytic activity; IEA:InterPro; GO:0007155; P:cell adhesion; IEA:UniProtKB-KW; GO:0008406; P:gonad development; IMP:WormBase; GO:0007399; P:nervous system development; IMP:WormBase	1.4e-06
cluster10905	2	FEX_0012621-mRNA1;FEX_0013236-mRNA1;	FEX_0012621-mRNA1	Q27757	Luciferin 4-monooxygenase	GO:0005777; C:peroxisome; IEA:UniProtKB-KW; GO:0005524; F:ATP binding; IEA:UniProtKB-KW; GO:0046872; F:metal ion binding; IEA:UniProtKB-KW; GO:0047077; F:Photinus-luciferin 4-monooxygenase (ATP-hydrolyzing) activity; IEA:UniProtKB-EC; GO:0008218; P:bioluminescence; IEA:UniProtKB-KW	8.3e-14
cluster10863	2	FEX_0000795-mRNA1;FEX_0008119-mRNA1;	FEX_0000795-mRNA1	Q54BK1	Geranylgeranyl pyrophosphate synthase	GO:0005737; C:cytoplasm; IEA:UniProtKB-KW; GO:0004161; F:dimethylallyltranstransferase activity; IEA:UniProtKB-EC; GO:0004311; F:farnesyltranstransferase activity; ISS:dictyBase; GO:0004337; F:geranyltranstransferase activity; ISS:dictyBase; GO:0046872; F:metal ion binding; IEA:UniProtKB-KW; GO:0045337; P:farnesyl diphosphate biosynthetic process; IEA:UniProtKB-UniPathway; GO:0033384; P:geranyl d…	3.9e-39
cluster5601	4	FEX_0001629-mRNA1;FEX_0000281-mRNA1;FEX_0002687-mRNA1;FEX_0002923-mRNA1;	FEX_0001629-mRNA1	Q54E43	Putative uncharacterized protein DDB_G0291812	NA	1.8e-06
cluster10918	2	FEX_0006065-mRNA1;FEX_0001397-mRNA1;	FEX_0006065-mRNA1	Q54FN7	Probable polyketide synthase 33	GO:0016021; C:integral component of membrane; IEA:UniProtKB-KW; GO:0016491; F:oxidoreductase activity; IEA:InterPro; GO:0016740; F:transferase activity; IEA:UniProtKB-KW	0.0044
cluster1556	5	FEX_0009863-mRNA1;FEX_0006045-mRNA1;FEX_0008030-mRNA1;FEX_0008737-mRNA1;FEX_0010838-mRNA1;	FEX_0009863-mRNA1	Q54FZ4	Putative uncharacterized protein DDB_G0290521	GO:0005576; C:extracellular region; IEA:UniProtKB-KW	2e-14
cluster8801	3	FEX_0004650-mRNA1;FEX_0011261-mRNA1;FEX_0004518-mRNA1;	FEX_0004650-mRNA1	Q54VQ7	Type-2 histone deacetylase 2	GO:0005737; C:cytoplasm; IEA:UniProtKB-KW; GO:0005634; C:nucleus; IEA:UniProtKB-KW; GO:0003677; F:DNA binding; IEA:InterPro; GO:0046872; F:metal ion binding; IEA:UniProtKB-KW; GO:0032041; F:NAD-dependent histone deacetylase activity (H3-K14 specific); IEA:UniProtKB-EC; GO:0097372; F:NAD-dependent histone deacetylase activity (H3-K18 specific); IEA:UniProtKB-EC; GO:0046969; F:NAD-dependent histone…	0.038
cluster10961	2	FEX_0012285-mRNA1;FEX_0008802-mRNA1;	FEX_0012285-mRNA1	Q555X4	Glycosyltransferase-like protein gnt15	GO:0016021; C:integral component of membrane; IEA:UniProtKB-KW; GO:0016338; P:calcium-independent cell-cell adhesion; IMP:dictyBase; GO:0030587; P:sorocarp development; IMP:dictyBase	0.054
cluster10956	2	FEX_0011005-mRNA1;FEX_0006669-mRNA1;	FEX_0011005-mRNA1	Q556J2	3-ketodihydrosphingosine reductase	GO:0047560; F:3-dehydrosphinganine reductase activity; ISS:dictyBase; GO:0030148; P:sphingolipid biosynthetic process; ISS:dictyBase	1.8e-10
cluster8803	3	FEX_0010326-mRNA1;FEX_0008166-mRNA1;FEX_0010335-mRNA1;	FEX_0010326-mRNA1	Q557C9	Homeobox protein 5	GO:0005634; C:nucleus; IEA:UniProtKB-KW; GO:0005509; F:calcium ion binding; IEA:InterPro; GO:0003677; F:DNA binding; IEA:UniProtKB-KW; GO:0007275; P:multicellular organismal development; IEA:UniProtKB-KW; GO:0006355; P:regulation of transcription, DNA-templated; IEA:UniProtKB-KW; GO:0006351; P:transcription, DNA-templated; IEA:UniProtKB-KW	0.00013
cluster8783	3	FEX_0012302-mRNA1;FEX_0001805-mRNA1;FEX_0008512-mRNA1;	FEX_0012302-mRNA1	Q55FI4	Nucleolar protein 58	GO:0005634; C:nucleus; IEA:UniProtKB-KW; GO:0042254; P:ribosome biogenesis; IEA:UniProtKB-KW	9.8e-13
cluster8817	3	FEX_0005497-mRNA1;FEX_0011915-mRNA1;FEX_0013281-mRNA1;	FEX_0005497-mRNA1	Q7JQ07	Mariner Mos1 transposase	GO:0005634; C:nucleus; IEA:UniProtKB-KW; GO:0003677; F:DNA binding; IEA:UniProtKB-KW; GO:0004519; F:endonuclease activity; IEA:UniProtKB-KW; GO:0046872; F:metal ion binding; IEA:UniProtKB-KW; GO:0015074; P:DNA integration; IEA:UniProtKB-KW; GO:0006310; P:DNA recombination; IEA:UniProtKB-KW	1.5e-20
cluster10942	2	FEX_0009757-mRNA1;FEX_0011294-mRNA1;	FEX_0009757-mRNA1	Q7JQ07	Mariner Mos1 transposase	GO:0005634; C:nucleus; IEA:UniProtKB-KW; GO:0003677; F:DNA binding; IEA:UniProtKB-KW; GO:0004519; F:endonuclease activity; IEA:UniProtKB-KW; GO:0046872; F:metal ion binding; IEA:UniProtKB-KW; GO:0015074; P:DNA integration; IEA:UniProtKB-KW; GO:0006310; P:DNA recombination; IEA:UniProtKB-KW	8e-36
cluster10886	2	FEX_0007326-mRNA1;FEX_0007325-mRNA1;	FEX_0007326-mRNA1	Q7M3K2	Transposable element P transposase	GO:0046872; F:metal ion binding; IEA:UniProtKB-KW; GO:0003693; F:P-element binding; IDA:UniProtKB; GO:0016740; F:transferase activity; IEA:UniProtKB-KW; GO:0004803; F:transposase activity; IDA:UniProtKB; GO:0015074; P:DNA integration; IEA:UniProtKB-KW; GO:0006313; P:transposition, DNA-mediated; IDA:UniProtKB	9.4e-25
cluster10937	2	FEX_0001925-mRNA1;FEX_0001924-mRNA1;	FEX_0001925-mRNA1	Q7Z119	Muscle M-line assembly protein unc-89	GO:0031672; C:A band; IDA:WormBase; GO:0031430; C:M band; IDA:WormBase; GO:0005524; F:ATP binding; IEA:InterPro; GO:0019902; F:phosphatase binding; IPI:WormBase; GO:0004672; F:protein kinase activity; IEA:InterPro; GO:0017048; F:Rho GTPase binding; IPI:WormBase; GO:0005089; F:Rho guanyl-nucleotide exchange factor activity; IDA:WormBase; GO:0031034; P:myosin filament assembly; IMP:WormBase; GO:003…	6e-21
cluster10938	2	FEX_0012158-mRNA1;FEX_0006493-mRNA1;	FEX_0012158-mRNA1	Q95SX7	Probable RNA-directed DNA polymerase from transposon BS	GO:0003964; F:RNA-directed DNA polymerase activity; IMP:UniProtKB; GO:0006278; P:RNA-dependent DNA replication; IMP:GOC; GO:0006313; P:transposition, DNA-mediated; IMP:UniProtKB	1.2e-10
cluster10958	2	FEX_0005496-mRNA1;FEX_0001681-mRNA1;	FEX_0005496-mRNA1	Q95SX7	Probable RNA-directed DNA polymerase from transposon BS	GO:0003964; F:RNA-directed DNA polymerase activity; IMP:UniProtKB; GO:0006278; P:RNA-dependent DNA replication; IMP:GOC; GO:0006313; P:transposition, DNA-mediated; IMP:UniProtKB	2.4e-31
cluster10933	2	FEX_0010408-mRNA1;FEX_0009977-mRNA3;	FEX_0010408-mRNA1	Q95XU6	Zinc finger CCCH domain-containing protein 14	GO:0005737; C:cytoplasm; IDA:UniProtKB; GO:0005634; C:nucleus; IDA:WormBase; GO:0048471; C:perinuclear region of cytoplasm; IDA:WormBase; GO:0046872; F:metal ion binding; IEA:UniProtKB-KW	0.00074
cluster10876	2	FEX_0010073-mRNA1;FEX_0010075-mRNA1;	FEX_0010073-mRNA1	Q9GU19	Sex determination protein fruitless	GO:0005634; C:nucleus; IEA:UniProtKB-KW; GO:0003677; F:DNA binding; IEA:UniProtKB-KW; GO:0046872; F:metal ion binding; IEA:UniProtKB-KW; GO:0003700; F:sequence-specific DNA binding transcription factor activity; NAS:UniProtKB; GO:0002118; P:aggressive behavior; IMP:FlyBase; GO:0016199; P:axon midline choice point recognition; IMP:FlyBase; GO:0007417; P:central nervous system development; IMP:FlyB…	0.0081
cluster10854	2	FEX_0002482-mRNA1;FEX_0001638-mRNA1;	FEX_0002482-mRNA1	Q9NBX4	Probable RNA-directed DNA polymerase from transposon X-element	GO:0003964; F:RNA-directed DNA polymerase activity; IMP:UniProtKB; GO:0006278; P:RNA-dependent DNA replication; IMP:GOC; GO:0006313; P:transposition, DNA-mediated; IMP:UniProtKB	2.6e-24
cluster10856	2	FEX_0006972-mRNA1;FEX_0001393-mRNA1;	FEX_0006972-mRNA1	Q9NBX4	Probable RNA-directed DNA polymerase from transposon X-element	GO:0003964; F:RNA-directed DNA polymerase activity; IMP:UniProtKB; GO:0006278; P:RNA-dependent DNA replication; IMP:GOC; GO:0006313; P:transposition, DNA-mediated; IMP:UniProtKB	3.3e-22
cluster10907	2	FEX_0001746-mRNA1;FEX_0007248-mRNA1;	FEX_0001746-mRNA1	Q9U1M8	Myosin-I heavy chain	GO:0031252; C:cell leading edge; IDA:dictyBase; GO:0005829; C:cytosol; IDA:dictyBase; GO:0030175; C:filopodium; IDA:dictyBase; GO:0016020; C:membrane; IDA:dictyBase; GO:0016459; C:myosin complex; ISS:dictyBase; GO:0001891; C:phagocytic cup; IDA:dictyBase; GO:0003779; F:actin binding; ISS:dictyBase; GO:0030898; F:actin-dependent ATPase activity; ISS:dictyBase; GO:0005524; F:ATP binding; ISS:dictyB…	0.021
cluster10947	2	FEX_0012936-mRNA2;FEX_0010668-mRNA1;	FEX_0012936-mRNA2	Q9U1M8	Myosin-I heavy chain	GO:0031252; C:cell leading edge; IDA:dictyBase; GO:0005829; C:cytosol; IDA:dictyBase; GO:0030175; C:filopodium; IDA:dictyBase; GO:0016020; C:membrane; IDA:dictyBase; GO:0016459; C:myosin complex; ISS:dictyBase; GO:0001891; C:phagocytic cup; IDA:dictyBase; GO:0003779; F:actin binding; ISS:dictyBase; GO:0030898; F:actin-dependent ATPase activity; ISS:dictyBase; GO:0005524; F:ATP binding; ISS:dictyB…	0.0068
cluster10954	2	FEX_0010303-mRNA1;FEX_0010304-mRNA1;	FEX_0010303-mRNA1	Q9VGR7	J domain-containing protein CG6693	NA	1.8e-23
cluster10857	2	FEX_0005198-mRNA1;FEX_0005195-mRNA1;	FEX_0005198-mRNA1	Q9VGU5	Tetratricopeptide repeat protein 14 homolog	NA	3e-57
cluster10888	2	FEX_0008893-mRNA1;FEX_0001382-mRNA1;	FEX_0008893-mRNA1	Q9VYY4	Cytochrome P450 4g15	GO:0005783; C:endoplasmic reticulum; IEA:UniProtKB-KW; GO:0016020; C:membrane; IEA:UniProtKB-KW; GO:0020037; F:heme binding; IEA:InterPro; GO:0005506; F:iron ion binding; IEA:InterPro; GO:0004497; F:monooxygenase activity; IEA:UniProtKB-KW; GO:0016705; F:oxidoreductase activity, acting on paired donors, with incorporation or reduction of molecular oxygen; IEA:InterPro	1.1e-29
cluster1559	5	FEX_0002920-mRNA1;FEX_0000351-mRNA1;FEX_0009901-mRNA1;FEX_0010992-mRNA1;FEX_0012145-mRNA1;	FEX_0002920-mRNA1	C0H4W3	Probable ATP-dependent helicase PF08_0048	GO:0005737; C:cytoplasm; NAS:UniProtKB; GO:0016020; C:membrane; NAS:UniProtKB; GO:0005634; C:nucleus; IEA:UniProtKB-KW; GO:0005524; F:ATP binding; ISS:GeneDB_Pfalciparum; GO:0008026; F:ATP-dependent helicase activity; ISS:GeneDB_Pfalciparum; GO:0003677; F:DNA binding; IEA:UniProtKB-KW; GO:0006200; P:ATP catabolic process; ISS:GOC; GO:0016568; P:chromatin modification; IEA:UniProtKB-KW; GO:0006355…	0.015
cluster43	21	FEX_0004915-mRNA1;FEX_0004859-mRNA1;FEX_0006881-mRNA1;FEX_0007525-mRNA1;FEX_0007620-mRNA1;FEX_0007692-mRNA1;FEX_0008188-mRNA1;FEX_0008441-mRNA1;FEX_0010070-mRNA1;FEX_0012000-mRNA1;FEX_0013024-mRNA1;FEX_0005970-mRNA1;FEX_0007524-mRNA1;FEX_0011325-mRNA1;FEX_0012682-mRNA1;FEX_0004851-mRNA1;FEX_0005576-mRNA3;FEX_0007523-mRNA1;FEX_0011019-mRNA1;FEX_0003226-mRNA1;FEX_0003000-mRNA1;	FEX_0004915-mRNA1	NA	NA	NA	NA
cluster62	16	FEX_0005861-mRNA1;FEX_0010312-mRNA1;FEX_0006976-mRNA1;FEX_0000735-mRNA1;FEX_0001686-mRNA1;FEX_0002508-mRNA1;FEX_0004799-mRNA1;FEX_0007796-mRNA1;FEX_0009091-mRNA1;FEX_0009527-mRNA1;FEX_0011957-mRNA1;FEX_0012529-mRNA1;FEX_0003720-mRNA1;FEX_0000925-mRNA1;FEX_0005978-mRNA1;FEX_0011607-mRNA1;	FEX_0005861-mRNA1	NA	NA	NA	NA
cluster93	13	FEX_0006484-mRNA1;FEX_0009960-mRNA1;FEX_0013611-mRNA1;FEX_0001020-mRNA1;FEX_0002182-mRNA1;FEX_0002665-mRNA1;FEX_0006820-mRNA1;FEX_0009487-mRNA1;FEX_0010700-mRNA1;FEX_0011677-mRNA1;FEX_0009980-mRNA1;FEX_0009981-mRNA1;FEX_0005210-mRNA1;	FEX_0006484-mRNA1	NA	NA	NA	NA
cluster135	11	FEX_0001391-mRNA1;FEX_0006114-mRNA1;FEX_0009000-mRNA1;FEX_0010628-mRNA1;FEX_0008167-mRNA1;FEX_0009575-mRNA1;FEX_0010248-mRNA1;FEX_0000297-mRNA1;FEX_0002674-mRNA1;FEX_0009764-mRNA1;FEX_0013350-mRNA1;	FEX_0001391-mRNA1	NA	NA	NA	NA
cluster136	11	FEX_0010633-mRNA1;FEX_0004124-mRNA1;FEX_0003307-mRNA1;FEX_0008253-mRNA1;FEX_0009580-mRNA1;FEX_0009887-mRNA1;FEX_0010116-mRNA1;FEX_0002175-mRNA1;FEX_0000748-mRNA1;FEX_0012562-mRNA1;FEX_0004531-mRNA1;	FEX_0010633-mRNA1	NA	NA	NA	NA
cluster166	10	FEX_0011683-mRNA1;FEX_0002146-mRNA1;FEX_0010310-mRNA1;FEX_0011511-mRNA1;FEX_0012962-mRNA1;FEX_0008713-mRNA1;FEX_0008606-mRNA1;FEX_0001092-mRNA1;FEX_0011120-mRNA1;FEX_0011224-mRNA1;	FEX_0011683-mRNA1	NA	NA	NA	NA
cluster172	10	FEX_0000766-mRNA1;FEX_0001127-mRNA1;FEX_0002474-mRNA1;FEX_0002572-mRNA1;FEX_0005600-mRNA1;FEX_0006832-mRNA1;FEX_0011598-mRNA1;FEX_0012565-mRNA1;FEX_0012926-mRNA1;FEX_0006047-mRNA1;	FEX_0000766-mRNA1	NA	NA	NA	NA
cluster232	9	FEX_0004763-mRNA1;FEX_0001561-mRNA1;FEX_0009389-mRNA1;FEX_0009963-mRNA1;FEX_0000530-mRNA1;FEX_0005251-mRNA1;FEX_0008997-mRNA1;FEX_0000427-mRNA1;FEX_0009390-mRNA1;	FEX_0004763-mRNA1	NA	NA	NA	NA
cluster234	9	FEX_0012931-mRNA1;FEX_0000453-mRNA1;FEX_0005477-mRNA1;FEX_0009496-mRNA1;FEX_0011241-mRNA1;FEX_0013242-mRNA1;FEX_0009898-mRNA1;FEX_0002915-mRNA1;FEX_0009291-mRNA1;	FEX_0012931-mRNA1	NA	NA	NA	NA
cluster237	9	FEX_0011285-mRNA1;FEX_0001656-mRNA1;FEX_0002553-mRNA1;FEX_0002921-mRNA1;FEX_0003208-mRNA1;FEX_0010107-mRNA1;FEX_0010979-mRNA1;FEX_0013637-mRNA1;FEX_0010564-mRNA1;	FEX_0011285-mRNA1	NA	NA	NA	NA
cluster240	9	FEX_0007348-mRNA1;FEX_0006666-mRNA1;FEX_0009576-mRNA1;FEX_0010247-mRNA1;FEX_0013349-mRNA1;FEX_0006486-mRNA1;FEX_0000402-mRNA1;FEX_0008999-mRNA1;FEX_0010975-mRNA1;	FEX_0007348-mRNA1	NA	NA	NA	NA
cluster338	8	FEX_0001558-mRNA1;FEX_0000816-mRNA1;FEX_0008171-mRNA1;FEX_0010415-mRNA1;FEX_0013489-mRNA1;FEX_0008678-mRNA1;FEX_0011273-mRNA1;FEX_0003150-mRNA1;	FEX_0001558-mRNA1	NA	NA	NA	NA
cluster525	7	FEX_0002909-mRNA1;FEX_0001105-mRNA1;FEX_0001794-mRNA1;FEX_0004197-mRNA1;FEX_0005987-mRNA1;FEX_0007131-mRNA1;FEX_0010253-mRNA1;	FEX_0002909-mRNA1	NA	NA	NA	NA
cluster841	6	FEX_0011266-mRNA1;FEX_0002177-mRNA1;FEX_0008297-mRNA1;FEX_0011265-mRNA1;FEX_0011270-mRNA1;FEX_0002176-mRNA1;	FEX_0011266-mRNA1	NA	NA	NA	NA
cluster843	6	FEX_0008256-mRNA1;FEX_0002152-mRNA1;FEX_0002156-mRNA1;FEX_0006819-mRNA1;FEX_0000344-mRNA1;FEX_0009132-mRNA1;	FEX_0008256-mRNA1	NA	NA	NA	NA
cluster880	6	FEX_0005250-mRNA1;FEX_0008027-mRNA1;FEX_0000466-mRNA1;FEX_0004627-mRNA1;FEX_0009044-mRNA1;FEX_0011532-mRNA1;	FEX_0005250-mRNA1	NA	NA	NA	NA
cluster1550	5	FEX_0013487-mRNA1;FEX_0000292-mRNA1;FEX_0010318-mRNA1;FEX_0004629-mRNA1;FEX_0009976-mRNA1;	FEX_0013487-mRNA1	NA	NA	NA	NA
cluster1553	5	FEX_0006825-mRNA1;FEX_0006197-mRNA1;FEX_0009050-mRNA1;FEX_0009056-mRNA1;FEX_0011684-mRNA1;	FEX_0006825-mRNA1	NA	NA	NA	NA
cluster1560	5	FEX_0008732-mRNA1;FEX_0009743-mRNA1;FEX_0009885-mRNA1;FEX_0013057-mRNA1;FEX_0004623-mRNA1;	FEX_0008732-mRNA1	NA	NA	NA	NA
cluster1562	5	FEX_0011534-mRNA1;FEX_0002541-mRNA3;FEX_0002543-mRNA1;FEX_0002542-mRNA1;FEX_0002545-mRNA1;	FEX_0011534-mRNA1	NA	NA	NA	NA
cluster1564	5	FEX_0004664-mRNA1;FEX_0009509-mRNA1;FEX_0013612-mRNA1;FEX_0013610-mRNA1;FEX_0004171-mRNA1;	FEX_0004664-mRNA1	NA	NA	NA	NA
cluster1568	5	FEX_0011679-mRNA1;FEX_0001123-mRNA1;FEX_0009958-mRNA1;FEX_0010701-mRNA1;FEX_0011529-mRNA1;	FEX_0011679-mRNA1	NA	NA	NA	NA
cluster1570	5	FEX_0009057-mRNA1;FEX_0008022-mRNA1;FEX_0008028-mRNA1;FEX_0008251-mRNA1;FEX_0009385-mRNA1;	FEX_0009057-mRNA1	NA	NA	NA	NA
cluster5573	4	FEX_0004526-mRNA1;FEX_0004933-mRNA1;FEX_0010409-mRNA1;FEX_0010412-mRNA1;	FEX_0004526-mRNA1	NA	NA	NA	NA
cluster5578	4	FEX_0013146-mRNA1;FEX_0012074-mRNA1;FEX_0009045-mRNA1;FEX_0009490-mRNA1;	FEX_0013146-mRNA1	NA	NA	NA	NA
cluster5579	4	FEX_0008998-mRNA1;FEX_0000566-mRNA1;FEX_0009852-mRNA1;FEX_0012389-mRNA1;	FEX_0008998-mRNA1	NA	NA	NA	NA
cluster5581	4	FEX_0007532-mRNA1;FEX_0005471-mRNA1;FEX_0009287-mRNA1;FEX_0010160-mRNA1;	FEX_0007532-mRNA1	NA	NA	NA	NA
cluster5586	4	FEX_0000465-mRNA1;FEX_0001560-mRNA1;FEX_0010368-mRNA1;FEX_0013533-mRNA1;	FEX_0000465-mRNA1	NA	NA	NA	NA
cluster5587	4	FEX_0002555-mRNA1;FEX_0004658-mRNA1;FEX_0008281-mRNA1;FEX_0012087-mRNA1;	FEX_0002555-mRNA1	NA	NA	NA	NA
cluster5591	4	FEX_0009315-mRNA1;FEX_0004630-mRNA1;FEX_0005530-mRNA1;FEX_0009952-mRNA1;	FEX_0009315-mRNA1	NA	NA	NA	NA
cluster5593	4	FEX_0002249-mRNA1;FEX_0006551-mRNA1;FEX_0007539-mRNA1;FEX_0010686-mRNA1;	FEX_0002249-mRNA1	NA	NA	NA	NA
cluster5597	4	FEX_0005470-mRNA1;FEX_0001617-mRNA1;FEX_0008698-mRNA1;FEX_0002793-mRNA1;	FEX_0005470-mRNA1	NA	NA	NA	NA
cluster5605	4	FEX_0010264-mRNA1;FEX_0001625-mRNA1;FEX_0010278-mRNA1;FEX_0012091-mRNA1;	FEX_0010264-mRNA1	NA	NA	NA	NA
cluster5608	4	FEX_0001818-mRNA1;FEX_0010839-mRNA1;FEX_0011191-mRNA1;FEX_0009117-mRNA1;	FEX_0001818-mRNA1	NA	NA	NA	NA
cluster5610	4	FEX_0012064-mRNA1;FEX_0008513-mRNA1;FEX_0010316-mRNA1;FEX_0009953-mRNA1;	FEX_0012064-mRNA1	NA	NA	NA	NA
cluster5612	4	FEX_0011228-mRNA1;FEX_0003262-mRNA1;FEX_0003272-mRNA1;FEX_0009055-mRNA1;	FEX_0011228-mRNA1	NA	NA	NA	NA
cluster5613	4	FEX_0011719-mRNA1;FEX_0000554-mRNA1;FEX_0001556-mRNA1;FEX_0011717-mRNA1;	FEX_0011719-mRNA1	NA	NA	NA	NA
cluster8758	3	FEX_0002103-mRNA1;FEX_0005476-mRNA1;FEX_0009497-mRNA1;	FEX_0002103-mRNA1	NA	NA	NA	NA
cluster8759	3	FEX_0000467-mRNA1;FEX_0001364-mRNA1;FEX_0008731-mRNA1;	FEX_0000467-mRNA1	NA	NA	NA	NA
cluster8765	3	FEX_0013483-mRNA1;FEX_0006036-mRNA1;FEX_0013528-mRNA1;	FEX_0013483-mRNA1	NA	NA	NA	NA
cluster8768	3	FEX_0002673-mRNA1;FEX_0001732-mRNA1;FEX_0011008-mRNA1;	FEX_0002673-mRNA1	NA	NA	NA	NA
cluster8770	3	FEX_0010327-mRNA1;FEX_0004533-mRNA1;FEX_0006058-mRNA1;	FEX_0010327-mRNA1	NA	NA	NA	NA
cluster8772	3	FEX_0002929-mRNA1;FEX_0002784-mRNA6;FEX_0011002-mRNA1;	FEX_0002929-mRNA1	NA	NA	NA	NA
cluster8775	3	FEX_0001735-mRNA1;FEX_0008739-mRNA1;FEX_0011208-mRNA1;	FEX_0001735-mRNA1	NA	NA	NA	NA
cluster8777	3	FEX_0008743-mRNA1;FEX_0004119-mRNA1;FEX_0008246-mRNA1;	FEX_0008743-mRNA1	NA	NA	NA	NA
cluster8778	3	FEX_0005953-mRNA1;FEX_0006372-mRNA1;FEX_0008497-mRNA1;	FEX_0005953-mRNA1	NA	NA	NA	NA
cluster8779	3	FEX_0013250-mRNA1;FEX_0009770-mRNA1;FEX_0011655-mRNA1;	FEX_0013250-mRNA1	NA	NA	NA	NA
cluster8780	3	FEX_0009130-mRNA1;FEX_0002589-mRNA1;FEX_0011379-mRNA1;	FEX_0009130-mRNA1	NA	NA	NA	NA
cluster8782	3	FEX_0008507-mRNA1;FEX_0002551-mRNA1;FEX_0004487-mRNA1;	FEX_0008507-mRNA1	NA	NA	NA	NA
cluster8784	3	FEX_0007611-mRNA1;FEX_0009124-mRNA1;FEX_0011471-mRNA1;	FEX_0007611-mRNA1	NA	NA	NA	NA
cluster8786	3	FEX_0011474-mRNA1;FEX_0003969-mRNA1;FEX_0008131-mRNA1;	FEX_0011474-mRNA1	NA	NA	NA	NA
cluster8787	3	FEX_0013497-mRNA1;FEX_0000360-mRNA1;FEX_0002710-mRNA1;	FEX_0013497-mRNA1	NA	NA	NA	NA
cluster8788	3	FEX_0002806-mRNA1;FEX_0009517-mRNA1;FEX_0009518-mRNA1;	FEX_0002806-mRNA1	NA	NA	NA	NA
cluster8789	3	FEX_0011322-mRNA1;FEX_0001647-mRNA1;FEX_0005547-mRNA1;	FEX_0011322-mRNA1	NA	NA	NA	NA
cluster8791	3	FEX_0002101-mRNA1;FEX_0001363-mRNA1;FEX_0001389-mRNA1;	FEX_0002101-mRNA1	NA	NA	NA	NA
cluster8792	3	FEX_0007254-mRNA1;FEX_0002934-mRNA1;FEX_0010320-mRNA1;	FEX_0007254-mRNA1	NA	NA	NA	NA
cluster8796	3	FEX_0008162-mRNA1;FEX_0000185-mRNA1;FEX_0009956-mRNA1;	FEX_0008162-mRNA1	NA	NA	NA	NA
cluster8797	3	FEX_0008913-mRNA1;FEX_0008919-mRNA1;FEX_0008920-mRNA1;	FEX_0008913-mRNA1	NA	NA	NA	NA
cluster8798	3	FEX_0012236-mRNA1;FEX_0012839-mRNA1;FEX_0013392-mRNA1;	FEX_0012236-mRNA1	NA	NA	NA	NA
cluster8799	3	FEX_0008715-mRNA1;FEX_0004651-mRNA1;FEX_0010309-mRNA1;	FEX_0008715-mRNA1	NA	NA	NA	NA
cluster8802	3	FEX_0010644-mRNA1;FEX_0002924-mRNA1;FEX_0006275-mRNA1;	FEX_0010644-mRNA1	NA	NA	NA	NA
cluster8804	3	FEX_0012249-mRNA1;FEX_0002980-mRNA1;FEX_0004156-mRNA1;	FEX_0012249-mRNA1	NA	NA	NA	NA
cluster8808	3	FEX_0005833-mRNA1;FEX_0007256-mRNA1;FEX_0002532-mRNA1;	FEX_0005833-mRNA1	NA	NA	NA	NA
cluster8811	3	FEX_0012306-mRNA1;FEX_0007252-mRNA1;FEX_0012278-mRNA1;	FEX_0012306-mRNA1	NA	NA	NA	NA
cluster8815	3	FEX_0003273-mRNA1;FEX_0000669-mRNA1;FEX_0001112-mRNA1;	FEX_0003273-mRNA1	NA	NA	NA	NA
cluster8818	3	FEX_0013113-mRNA1;FEX_0002243-mRNA1;FEX_0002586-mRNA1;	FEX_0013113-mRNA1	NA	NA	NA	NA
cluster8819	3	FEX_0001877-mRNA1;FEX_0011388-mRNA1;FEX_0001753-mRNA1;	FEX_0001877-mRNA1	NA	NA	NA	NA
cluster8823	3	FEX_0012539-mRNA1;FEX_0012536-mRNA1;FEX_0012538-mRNA1;	FEX_0012539-mRNA1	NA	NA	NA	NA
cluster10846	2	FEX_0011612-mRNA1;FEX_0008680-mRNA1;	FEX_0011612-mRNA1	NA	NA	NA	NA
cluster10847	2	FEX_0012930-mRNA1;FEX_0005924-mRNA1;	FEX_0012930-mRNA1	NA	NA	NA	NA
cluster10848	2	FEX_0002149-mRNA1;FEX_0000043-mRNA1;	FEX_0002149-mRNA1	NA	NA	NA	NA
cluster10849	2	FEX_0007022-mRNA1;FEX_0000399-mRNA1;	FEX_0007022-mRNA1	NA	NA	NA	NA
cluster10850	2	FEX_0002799-mRNA1;FEX_0004810-mRNA1;	FEX_0002799-mRNA1	NA	NA	NA	NA
cluster10851	2	FEX_0006813-mRNA1;FEX_0001791-mRNA1;	FEX_0006813-mRNA1	NA	NA	NA	NA
cluster10852	2	FEX_0011454-mRNA1;FEX_0011455-mRNA1;	FEX_0011454-mRNA1	NA	NA	NA	NA
cluster10853	2	FEX_0011232-mRNA1;FEX_0010114-mRNA1;	FEX_0011232-mRNA1	NA	NA	NA	NA
cluster10855	2	FEX_0001744-mRNA1;FEX_0000800-mRNA1;	FEX_0001744-mRNA1	NA	NA	NA	NA
cluster10858	2	FEX_0010400-mRNA1;FEX_0012966-mRNA1;	FEX_0010400-mRNA1	NA	NA	NA	NA
cluster10859	2	FEX_0000737-mRNA1;FEX_0011505-mRNA1;	FEX_0000737-mRNA1	NA	NA	NA	NA
cluster10860	2	FEX_0000348-mRNA1;FEX_0003140-mRNA1;	FEX_0000348-mRNA1	NA	NA	NA	NA
cluster10861	2	FEX_0013441-mRNA1;FEX_0013442-mRNA1;	FEX_0013441-mRNA1	NA	NA	NA	NA
cluster10862	2	FEX_0011114-mRNA1;FEX_0010631-mRNA1;	FEX_0011114-mRNA1	NA	NA	NA	NA
cluster10864	2	FEX_0002584-mRNA1;FEX_0009746-mRNA1;	FEX_0002584-mRNA1	NA	NA	NA	NA
cluster10865	2	FEX_0009059-mRNA1;FEX_0012212-mRNA1;	FEX_0009059-mRNA1	NA	NA	NA	NA
cluster10867	2	FEX_0007702-mRNA1;FEX_0012120-mRNA1;	FEX_0007702-mRNA1	NA	NA	NA	NA
cluster10868	2	FEX_0008796-mRNA1;FEX_0012079-mRNA1;	FEX_0008796-mRNA1	NA	NA	NA	NA
cluster10869	2	FEX_0008763-mRNA1;FEX_0013609-mRNA1;	FEX_0008763-mRNA1	NA	NA	NA	NA
cluster10870	2	FEX_0000670-mRNA1;FEX_0010843-mRNA1;	FEX_0000670-mRNA1	NA	NA	NA	NA
cluster10871	2	FEX_0005244-mRNA1;FEX_0011653-mRNA1;	FEX_0005244-mRNA1	NA	NA	NA	NA
cluster10872	2	FEX_0009729-mRNA1;FEX_0008834-mRNA1;	FEX_0009729-mRNA1	NA	NA	NA	NA
cluster10873	2	FEX_0002292-mRNA1;FEX_0002291-mRNA1;	FEX_0002292-mRNA1	NA	NA	NA	NA
cluster10874	2	FEX_0005650-mRNA1;FEX_0013636-mRNA1;	FEX_0005650-mRNA1	NA	NA	NA	NA
cluster10875	2	FEX_0007014-mRNA1;FEX_0000317-mRNA1;	FEX_0007014-mRNA1	NA	NA	NA	NA
cluster10877	2	FEX_0009827-mRNA1;FEX_0013482-mRNA1;	FEX_0009827-mRNA1	NA	NA	NA	NA
cluster10878	2	FEX_0013109-mRNA1;FEX_0001007-mRNA1;	FEX_0013109-mRNA1	NA	NA	NA	NA
cluster10879	2	FEX_0000333-mRNA1;FEX_0000334-mRNA1;	FEX_0000333-mRNA1	NA	NA	NA	NA
cluster10880	2	FEX_0001385-mRNA1;FEX_0000688-mRNA1;	FEX_0001385-mRNA1	NA	NA	NA	NA
cluster10881	2	FEX_0001028-mRNA1;FEX_0011283-mRNA1;	FEX_0001028-mRNA1	NA	NA	NA	NA
cluster10882	2	FEX_0013015-mRNA1;FEX_0009254-mRNA1;	FEX_0013015-mRNA1	NA	NA	NA	NA
cluster10883	2	FEX_0010958-mRNA1;FEX_0011037-mRNA1;	FEX_0010958-mRNA1	NA	NA	NA	NA
cluster10885	2	FEX_0008511-mRNA1;FEX_0000396-mRNA1;	FEX_0008511-mRNA1	NA	NA	NA	NA
cluster10887	2	FEX_0004538-mRNA1;FEX_0000286-mRNA1;	FEX_0004538-mRNA1	NA	NA	NA	NA
cluster10889	2	FEX_0000756-mRNA1;FEX_0009040-mRNA1;	FEX_0000756-mRNA1	NA	NA	NA	NA
cluster10890	2	FEX_0008257-mRNA1;FEX_0006685-mRNA1;	FEX_0008257-mRNA1	NA	NA	NA	NA
cluster10891	2	FEX_0012284-mRNA1;FEX_0001577-mRNA1;	FEX_0012284-mRNA1	NA	NA	NA	NA
cluster10892	2	FEX_0006447-mRNA1;FEX_0010522-mRNA1;	FEX_0006447-mRNA1	NA	NA	NA	NA
cluster10893	2	FEX_0006186-mRNA1;FEX_0009889-mRNA1;	FEX_0006186-mRNA1	NA	NA	NA	NA
cluster10894	2	FEX_0011687-mRNA1;FEX_0010573-mRNA1;	FEX_0011687-mRNA1	NA	NA	NA	NA
cluster10896	2	FEX_0001587-mRNA1;FEX_0012295-mRNA1;	FEX_0001587-mRNA1	NA	NA	NA	NA
cluster10898	2	FEX_0005955-mRNA1;FEX_0008502-mRNA1;	FEX_0005955-mRNA1	NA	NA	NA	NA
cluster10899	2	FEX_0011032-mRNA1;FEX_0009774-mRNA1;	FEX_0011032-mRNA1	NA	NA	NA	NA
cluster10901	2	FEX_0003187-mRNA1;FEX_0011602-mRNA1;	FEX_0003187-mRNA1	NA	NA	NA	NA
cluster10902	2	FEX_0013023-mRNA1;FEX_0010411-mRNA1;	FEX_0013023-mRNA1	NA	NA	NA	NA
cluster10903	2	FEX_0002352-mRNA1;FEX_0011179-mRNA1;	FEX_0002352-mRNA1	NA	NA	NA	NA
cluster10904	2	FEX_0005535-mRNA1;FEX_0007245-mRNA1;	FEX_0005535-mRNA1	NA	NA	NA	NA
cluster10906	2	FEX_0011611-mRNA1;FEX_0009370-mRNA1;	FEX_0011611-mRNA1	NA	NA	NA	NA
cluster10908	2	FEX_0010761-mRNA1;FEX_0009099-mRNA1;	FEX_0010761-mRNA1	NA	NA	NA	NA
cluster10909	2	FEX_0011303-mRNA1;FEX_0000455-mRNA1;	FEX_0011303-mRNA1	NA	NA	NA	NA
cluster10910	2	FEX_0002102-mRNA1;FEX_0001871-mRNA1;	FEX_0002102-mRNA1	NA	NA	NA	NA
cluster10911	2	FEX_0001748-mRNA1;FEX_0009759-mRNA1;	FEX_0001748-mRNA1	NA	NA	NA	NA
cluster10912	2	FEX_0009909-mRNA1;FEX_0009060-mRNA1;	FEX_0009909-mRNA1	NA	NA	NA	NA
cluster10913	2	FEX_0001749-mRNA1;FEX_0004116-mRNA1;	FEX_0001749-mRNA1	NA	NA	NA	NA
cluster10914	2	FEX_0011253-mRNA1;FEX_0010646-mRNA1;	FEX_0011253-mRNA1	NA	NA	NA	NA
cluster10915	2	FEX_0004783-mRNA1;FEX_0011725-mRNA1;	FEX_0004783-mRNA1	NA	NA	NA	NA
cluster10916	2	FEX_0007023-mRNA1;FEX_0008683-mRNA1;	FEX_0007023-mRNA1	NA	NA	NA	NA
cluster10917	2	FEX_0011302-mRNA1;FEX_0000463-mRNA1;	FEX_0011302-mRNA1	NA	NA	NA	NA
cluster10919	2	FEX_0006349-mRNA1;FEX_0009089-mRNA1;	FEX_0006349-mRNA1	NA	NA	NA	NA
cluster10921	2	FEX_0002560-mRNA1;FEX_0013613-mRNA1;	FEX_0002560-mRNA1	NA	NA	NA	NA
cluster10923	2	FEX_0002676-mRNA1;FEX_0006812-mRNA1;	FEX_0002676-mRNA1	NA	NA	NA	NA
cluster10924	2	FEX_0007318-mRNA1;FEX_0008759-mRNA1;	FEX_0007318-mRNA1	NA	NA	NA	NA
cluster10925	2	FEX_0010834-mRNA1;FEX_0004191-mRNA1;	FEX_0010834-mRNA1	NA	NA	NA	NA
cluster10926	2	FEX_0006202-mRNA1;FEX_0000359-mRNA1;	FEX_0006202-mRNA1	NA	NA	NA	NA
cluster10927	2	FEX_0004136-mRNA1;FEX_0001572-mRNA1;	FEX_0004136-mRNA1	NA	NA	NA	NA
cluster10928	2	FEX_0010404-mRNA1;FEX_0001820-mRNA1;	FEX_0010404-mRNA1	NA	NA	NA	NA
cluster10929	2	FEX_0008296-mRNA1;FEX_0000796-mRNA1;	FEX_0008296-mRNA1	NA	NA	NA	NA
cluster10930	2	FEX_0004535-mRNA1;FEX_0009303-mRNA1;	FEX_0004535-mRNA1	NA	NA	NA	NA
cluster10931	2	FEX_0006974-mRNA1;FEX_0011040-mRNA1;	FEX_0006974-mRNA1	NA	NA	NA	NA
cluster10932	2	FEX_0010957-mRNA1;FEX_0001138-mRNA1;	FEX_0010957-mRNA1	NA	NA	NA	NA
cluster10934	2	FEX_0000055-mRNA1;FEX_0006955-mRNA1;	FEX_0000055-mRNA1	NA	NA	NA	NA
cluster10935	2	FEX_0002792-mRNA1;FEX_0007531-mRNA1;	FEX_0002792-mRNA1	NA	NA	NA	NA
cluster10936	2	FEX_0009857-mRNA1;FEX_0011543-mRNA1;	FEX_0009857-mRNA1	NA	NA	NA	NA
cluster10939	2	FEX_0005246-mRNA1;FEX_0007891-mRNA1;	FEX_0005246-mRNA1	NA	NA	NA	NA
cluster10940	2	FEX_0006662-mRNA1;FEX_0010451-mRNA1;	FEX_0006662-mRNA1	NA	NA	NA	NA
cluster10941	2	FEX_0010323-mRNA1;FEX_0011522-mRNA1;	FEX_0010323-mRNA1	NA	NA	NA	NA
cluster10943	2	FEX_0000461-mRNA1;FEX_0013241-mRNA1;	FEX_0000461-mRNA1	NA	NA	NA	NA
cluster10944	2	FEX_0010523-mRNA1;FEX_0011408-mRNA1;	FEX_0010523-mRNA1	NA	NA	NA	NA
cluster10945	2	FEX_0009849-mRNA1;FEX_0012277-mRNA1;	FEX_0009849-mRNA1	NA	NA	NA	NA
cluster10946	2	FEX_0011324-mRNA1;FEX_0008046-mRNA1;	FEX_0011324-mRNA1	NA	NA	NA	NA
cluster10948	2	FEX_0000764-mRNA1;FEX_0010665-mRNA1;	FEX_0000764-mRNA1	NA	NA	NA	NA
cluster10949	2	FEX_0002485-mRNA1;FEX_0000251-mRNA1;	FEX_0002485-mRNA1	NA	NA	NA	NA
cluster10950	2	FEX_0003276-mRNA1;FEX_0011535-mRNA1;	FEX_0003276-mRNA1	NA	NA	NA	NA
cluster10952	2	FEX_0012307-mRNA1;FEX_0006800-mRNA1;	FEX_0012307-mRNA1	NA	NA	NA	NA
cluster10953	2	FEX_0008222-mRNA1;FEX_0008223-mRNA1;	FEX_0008222-mRNA1	NA	NA	NA	NA
cluster10955	2	FEX_0000562-mRNA1;FEX_0004177-mRNA1;	FEX_0000562-mRNA1	NA	NA	NA	NA
cluster10957	2	FEX_0011280-mRNA1;FEX_0009046-mRNA1;	FEX_0011280-mRNA1	NA	NA	NA	NA
cluster10959	2	FEX_0005142-mRNA1;FEX_0005143-mRNA1;	FEX_0005142-mRNA1	NA	NA	NA	NA
cluster10960	2	FEX_0012288-mRNA1;FEX_0002942-mRNA1;	FEX_0012288-mRNA1	NA	NA	NA	NA
cluster10962	2	FEX_0009492-mRNA1;FEX_0001568-mRNA1;	FEX_0009492-mRNA1	NA	NA	NA	NA
