# Supplementary material for: The first draft genomes of the ant Formica exsecta, and its Wolbachia endosymbiont reveal extensive gene transfer from endosymbiont to host
Source: BMC Genomics. 2019 Apr 16;20:301. doi: 10.1186/s12864-019-5665-6 (PMC6469114; doi:10.1186/s12864-019-5665-6)
Supplement: Supplementary file 4 — Table S4. List of F. exsecta genes under positive or relaxed purifying selection (dN/dS ratios > 1) in comparison to five other ant species (Camponotus floridanus, Lasius niger, Solenopsis invicta and Cerapachys biroi) (XLSX 115 kb) [file 12864_2019_5665_MOESM4_ESM.xlsx]

## Sheet: Table S4
Table S4: List of F. exsecta genes under positive or relaxed purifying selection (dN/dS ratios > 1) in comparison to five other ant species (Camponotus floridanus, Lasius niger, Solenopsis invicta and Cerapachys biroi)
Gene name	Codon	Model	InL	Background_w_0	Background_w_1	Background_w_2a	Background_w_2b	foreground_w_0	foreground_w_1	foreground_w_2a	foreground_w_2b	site	Annotation	Species	Gene Ontology
FEX_0005239-mRNA1	F3x4	PositiveSelection	-3389.161322	0.08831	1.00000	0.08831	1.00000	0.08831	1.00000	422.43426	422.43426	2_F_0.834;3_L_0.754;21_L_0.818;25_Q_0.934;26_G_0.891;27_Y_0.563;43_A_0.754;48_L_0.801;52_P_0.896;53_Q_0.999**;54_R_0.994**;63_L_0.682;68_A_0.997**;69_P_0.954*;71_H_0.642;72_R_0.986*;73_A_0.989*;74_P_0.817;75_A_0.579;76_S_0.738;77_Q_0.937;78_Q_0.883;80_I_0.923;81_Q_1.000**;82_V_0.629;83_Q_0.751;84_L_0.765;85_Q_0.993**;86_P_0.936;90_Q_0.914;109_D_0.574;132_A_0.786;150_P_0.954*;151_S_0.949;161_E_0.6…	Adenylate terminal-differentiation specific-like protein	Lasius niger	NA
FEX_0011262-mRNA1	F3x4	PositiveSelection	-2106.670484	0.06733	1.00000	0.06733	1.00000	0.06733	1.00000	16.38917	16.38917	48_S_0.783;122_D_0.968*;164_P_0.565;	Neugrin	Camponotus floridanus	NA
FEX_0005241-mRNA1	F3x4	PositiveSelection	-2392.892866	0.06360	1.00000	0.06360	1.00000	0.06360	1.00000	224.27589	224.27589	77_V_0.584;236_S_0.986*;244_A_0.674;	Zinc finger and scan domain-containing protein 22-like protein	Camponotus floridanus	GO:0003676|nucleic acid binding|IEA; GO:0005634|nucleus|IEA; GO:0008270|zinc ion binding|IEA; GO:0046872|metal ion binding|IEA
FEX_0008113-mRNA1	F3x4	PositiveSelection	-2063.913648	0.04556	1.00000	0.04556	1.00000	0.04556	1.00000	11.08224	11.08224	49_V_0.743;55_N_0.657;59_D_0.729;61_P_0.763;117_E_0.542;146_G_0.817;147_L_0.986*;152_G_0.824;159_F_0.803;160_G_0.786;164_L_0.990**;166_A_0.785;	DUF1676 domain containing protein	Cerapachys biroi	NA
FEX_0007791-mRNA1	F3x4	PositiveSelection	-7376.804816	0.05402	1.00000	0.05402	1.00000	0.05402	1.00000	999.00000	999.00000	66_T_0.581;235_S_0.588;272_T_0.661;283_G_0.520;302_I_0.543;453_S_0.862;456_A_0.813;602_A_0.602;603_D_0.705;635_R_0.844;677_D_0.773;723_A_0.620;739_T_0.717;802_I_0.951*;803_L_0.996**;804_M_1.000**;805_L_0.939;806_V_0.946;807_K_0.986*;808_N_0.997**;810_T_0.864;811_F_0.998**;812_A_0.998**;813_D_0.994**;814_I_1.000**;815_L_0.997**;816_I_0.999**;817_Q_0.999**;818_I_1.000**;819_E_1.000**;820_D_0.881;82…	Hermansky-Pudlak syndrome 3 protein-like protein	Lasius niger	NA
FEX_0007879-mRNA3	F3x4	PositiveSelection	-1724.174613	0.04468	1.00000	0.04468	1.00000	0.04468	1.00000	76.42735	76.42735	3_T_0.789;149_A_0.789;151_S_0.973*;	Ankyrin repeat domain-containing protein SOWAHB	Camponotus floridanus	NA
FEX_0011590-mRNA1	F3x4	PositiveSelection	-2276.851444	0.02606	1.00000	0.02606	1.00000	0.02606	1.00000	403.39794	403.39794	282_N_0.789;324_L_0.999**;325_Q_0.887;326_K_0.992**;	Storkhead-box protein 1	Lasius niger	NA
FEX_0011594-mRNA7	F3x4	PositiveSelection	-6371.245993	0.09269	1.00000	0.09269	1.00000	0.09269	1.00000	999.00000	999.00000	9_T_0.965*;172_Y_0.521;231_D_0.812;639_G_0.735;644_P_0.684;	tRNA-splicing endonuclease subunit Sen54	Camponotus floridanus	GO:0004519|endonuclease activity|IEA; GO:0090305|nucleic acid phosphodiester bond hydrolysis|IEA
FEX_0012612-mRNA1	F3x4	PositiveSelection	-12156.531070	0.11964	1.00000	0.11964	1.00000	0.11964	1.00000	949.25443	949.25443	121_V_0.695;122_S_0.971*;123_R_0.690;125_K_0.757;126_R_0.918;127_S_0.913;155_G_0.691;282_D_0.887;345_I_0.707;412_P_0.641;482_K_0.917;483_E_0.682;552_D_0.671;553_E_0.769;554_V_0.553;557_S_0.912;559_E_0.785;560_G_0.570;564_Q_0.913;614_R_0.899;615_G_0.777;681_R_0.519;684_E_0.804;889_P_0.628;	Microtubule-associated protein futsch-like protein	Lasius niger	GO:0005576|extracellular region|IEA; GO:0006030|chitin metabolic process|IEA; GO:0008061|chitin binding|IEA
FEX_0007918-mRNA1	F3x4	PositiveSelection	-1514.298294	0.04207	1.00000	0.04207	1.00000	0.04207	1.00000	998.99248	998.99248	2_A_0.995**;3_S_0.749;5_K_0.518;128_V_0.675;	Dynein light chain 1, axonemal	Lasius niger	NA
FEX_0002316-mRNA1	F3x4	PositiveSelection	-3277.795415	0.02971	1.00000	0.02971	1.00000	0.02971	1.00000	19.32783	19.32783	35_H_0.954*;	TM2 multi-domain protein	Camponotus floridanus	NA
FEX_0002325-mRNA1	F3x4	PositiveSelection	-352.149708	0.39360	1.00000	0.39360	1.00000	0.39360	1.00000	999.00000	999.00000	1_N_0.564;6_N_0.978*;7_D_0.959*;8_D_0.936;	Protein BAT4-like protein	Camponotus floridanus	GO:0003676|nucleic acid binding|IEA
FEX_0012653-mRNA1	F3x4	PositiveSelection	-4849.731675	0.09069	1.00000	0.09069	1.00000	0.09069	1.00000	19.36668	19.36668	2_H_0.973*;3_I_0.757;5_E_0.656;6_S_0.978*;7_Y_0.956*;8_E_0.977*;22_L_0.515;173_M_0.503;194_P_0.567;371_N_0.632;454_T_0.656;	Folylpolyglutamate synthase	Lasius niger	GO:0004326|tetrahydrofolylpolyglutamate synthase activity|IEA; GO:0005524|ATP binding|IEA; GO:0006730|one-carbon metabolic process|IEA; GO:0009058|biosynthetic process|IEA; GO:0009396|folic acid-containing compound biosynthetic process|IEA; GO:0016874|ligase activity|IEA; GO:0046901|tetrahydrofolylpolyglutamate biosynthetic process|IEA
FEX_0011009-mRNA1	F3x4	PositiveSelection	-12626.224288	0.05480	1.00000	0.05480	1.00000	0.05480	1.00000	3.26601	3.26601	8_R_0.521;17_L_0.540;19_V_0.580;32_N_0.520;126_I_0.568;239_R_0.634;262_Q_0.632;325_T_0.567;372_A_0.980*;401_C_0.608;532_T_0.974*;539_R_0.633;541_T_0.592;603_V_0.562;608_A_0.583;925_L_0.602;990_Q_0.594;1025_Q_0.625;1050_Q_0.604;1066_A_0.583;1068_D_0.517;1174_L_0.705;1275_S_0.629;1286_N_0.989*;	Structural maintenance of chromosomes protein	Camponotus floridanus	GO:0005524|ATP binding|IEA; GO:0005634|nucleus|IEA; GO:0005694|chromosome|IEA; GO:0051276|chromosome organization|IEA
FEX_0010744-mRNA1	F3x4	PositiveSelection	-16228.080078	0.03184	1.00000	0.03184	1.00000	0.03184	1.00000	137.32942	137.32942	483_P_0.550;667_S_0.674;982_T_0.526;1121_T_0.537;1135_I_0.681;1314_E_0.617;1471_S_0.979*;1662_Q_0.976*;1727_Q_0.568;1790_D_0.978*;1791_D_0.956*;1793_E_0.613;1794_K_0.997**;1797_E_0.989*;1798_D_0.999**;1799_A_0.996**;1800_Q_0.617;1814_R_0.642;1819_R_0.886;1821_L_0.678;1822_W_0.542;1823_T_0.626;1829_L_0.584;1830_E_0.999**;1833_I_0.609;	Helicase domino	Camponotus floridanus	GO:0004386|helicase activity|IEA; GO:0005524|ATP binding|IEA; GO:0008152|metabolic process|IEA
FEX_0010756-mRNA4	F3x4	PositiveSelection	-6180.084252	0.03304	1.00000	0.03304	1.00000	0.03304	1.00000	750.26591	750.26591	1_P_0.977*;2_Q_0.997**;3_T_0.861;6_N_0.959*;8_L_0.672;9_E_0.677;11_W_0.997**;12_D_0.991**;13_Y_0.617;14_S_0.972*;15_I_0.992**;17_F_0.963*;18_L_0.820;19_K_0.696;22_T_0.646;23_S_0.762;24_E_0.899;25_S_0.830;188_W_0.807;192_A_0.950;585_S_0.848;586_N_0.857;	Myosin_tail_1 multi-domain protein	Camponotus floridanus	NA
FEX_0010748-mRNA1	F3x4	PositiveSelection	-3295.980183	0.04734	1.00000	0.04734	1.00000	0.04734	1.00000	999.00000	999.00000	5_D_0.553;6_D_0.795;8_T_0.755;9_E_0.812;232_T_0.524;402_T_0.792;406_Q_0.849;407_C_0.926;408_K_0.836;409_V_0.765;410_S_0.881;411_N_0.857;412_D_0.998**;413_P_0.866;414_S_0.689;415_V_0.975*;416_V_0.819;417_Y_0.994**;	Protein sidekick	Camponotus floridanus	GO:0016020|membrane|IEA; GO:0016021|integral to membrane|IEA
FEX_0007448-mRNA1	F3x4	PositiveSelection	-4458.469609	0.04049	1.00000	0.04049	1.00000	0.04049	1.00000	153.38667	153.38667	187_T_0.776;193_P_0.542;201_L_0.563;480_E_0.618;514_T_0.932;515_F_0.879;516_I_0.983*;518_V_0.673;519_G_0.997**;520_G_0.999**;521_N_0.634;523_K_0.990*;524_G_0.785;526_F_0.625;	Beta-glucuronidase	Wasmannia auropunctata	GO:0004553|hydrolase activity, hydrolyzing O-glycosyl compounds|IEA; GO:0005975|carbohydrate metabolic process|IEA
FEX_0011516-mRNA1	F3x4	PositiveSelection	-2059.083304	0.07050	1.00000	0.07050	1.00000	0.07050	1.00000	187.86427	187.86427	29_Y_0.630;30_D_0.887;31_D_0.593;32_S_0.612;33_R_0.974*;34_T_0.982*;35_T_0.905;43_F_0.604;49_S_0.965*;51_V_0.972*;54_T_0.973*;71_L_0.976*;72_L_0.962*;74_S_0.995**;75_L_0.999**;76_T_0.890;77_K_0.964*;78_P_0.792;79_Y_0.746;82_N_0.999**;83_P_0.989*;84_I_0.998**;85_D_0.985*;86_G_1.000**;87_F_0.958*;88_V_0.976*;89_S_0.543;90_R_1.000**;91_L_1.000**;92_A_1.000**;94_R_0.996**;95_L_0.518;96_R_0.995**;98_L…	MADF domain containing protein	Vollenhovia emeryi	NA
FEX_0012267-mRNA1	F3x4	PositiveSelection	-3964.803313	0.01380	1.00000	0.01380	1.00000	0.01380	1.00000	999.00000	999.00000	7_T_0.696;55_E_0.727;88_T_0.650;90_R_0.969*;191_M_0.872;431_A_0.741;434_R_0.651;468_L_0.981*;481_F_0.542;497_S_0.735;	Pyruvate kinase	Camponotus floridanus	GO:0000287|magnesium ion binding|IEA; GO:0003824|catalytic activity|IEA; GO:0004743|pyruvate kinase activity|IEA; GO:0006096|glycolysis|IEA; GO:0016301|kinase activity|IEA; GO:0016310|phosphorylation|IEA; GO:0016740|transferase activity|IEA; GO:0030955|potassium ion binding|IEA
FEX_0011499-mRNA7	F3x4	PositiveSelection	-10260.127552	0.09699	1.00000	0.09699	1.00000	0.09699	1.00000	998.99977	998.99977	196_I_0.516;565_S_0.523;625_S_0.887;1016_S_0.551;1017_Y_0.993**;1018_E_0.985*;1019_L_0.816;1020_S_0.943;1024_D_0.995**;1027_R_0.990*;1028_R_0.993**;1029_D_0.962*;1030_Y_0.516;1032_K_0.983*;1033_D_0.984*;1036_I_0.999**;1039_T_0.955*;1040_N_0.997**;1041_L_0.542;1044_E_0.997**;1045_S_0.912;1046_N_0.828;1048_D_0.982*;1050_P_0.932;	O-ag_pol_Wzy multi-domain protein	Camponotus floridanus	NA
FEX_0003414-mRNA1	F3x4	PositiveSelection	-2619.699061	0.01733	1.00000	0.01733	1.00000	0.01733	1.00000	10.51484	10.51484	238_T_0.962*;325_A_0.548;	Cyclin-L1	Camponotus floridanus	GO:0000079|regulation of cyclin-dependent protein kinase activity|IEA; GO:0005634|nucleus|IEA; GO:0006355|regulation of transcription, DNA-dependent|IEA; GO:0019901|protein kinase binding|IEA
FEX_0002458-mRNA1	F3x4	PositiveSelection	-8007.485922	0.09860	1.00000	0.09860	1.00000	0.09860	1.00000	50.93778	50.93778	96_N_0.522;97_Y_0.922;98_P_0.720;99_N_0.999**;101_P_0.852;102_E_0.922;105_V_0.810;108_S_0.639;119_H_0.589;232_D_0.687;263_D_0.555;317_Y_0.880;318_N_0.597;333_K_0.965*;340_E_0.667;343_K_0.585;349_E_0.600;350_K_0.890;394_C_0.988*;500_F_0.581;547_S_0.940;	Math and lrr domain-containing protein	Camponotus floridanus	GO:0000287|magnesium ion binding|IEA; GO:0004749|ribose phosphate diphosphokinase activity|IEA; GO:0009165|nucleotide biosynthetic process|IEA
FEX_0004204-mRNA1	F3x4	PositiveSelection	-1386.433783	0.06306	1.00000	0.06306	1.00000	0.06306	1.00000	999.00000	999.00000	39_Q_0.967*;	Gustatory receptor	Wasmannia auropunctata	GO:0004871|signal transducer activity|IEA; GO:0007165|signal transduction|IEA; GO:0008527|taste receptor activity|IEA; GO:0016020|membrane|IEA; GO:0016021|integral to membrane|IEA; GO:0050912|detection of chemical stimulus involved in sensory perception of taste|IEA
FEX_0002729-mRNA1	F3x4	PositiveSelection	-21867.989521	0.06005	1.00000	0.06005	1.00000	0.06005	1.00000	36.69820	36.69820	1_D_0.736;2_R_0.576;27_A_0.565;56_T_0.518;208_D_0.559;309_H_0.569;895_S_0.965*;1447_V_0.644;1449_H_0.936;1450_F_0.763;1451_V_0.744;1453_V_0.952*;1455_S_0.948;1508_A_0.512;1566_S_0.520;1593_V_0.519;1605_N_0.591;1718_I_0.522;1777_L_0.522;1814_M_0.549;1967_V_0.514;1979_F_0.562;1991_A_0.504;2103_P_0.527;2110_A_0.584;2152_V_0.508;2170_A_0.930;2354_S_0.587;2360_P_0.531;2381_P_0.560;2394_P_0.520;2413_A_…	Serine threonine-protein kinase wnk1	Lasius niger	GO:0004672|protein kinase activity|IEA; GO:0004674|protein serine/threonine kinase activity|IEA; GO:0005524|ATP binding|IEA; GO:0006468|protein phosphorylation|IEA; GO:0016301|kinase activity|IEA; GO:0016310|phosphorylation|IEA
FEX_0003956-mRNA1	F3x4	PositiveSelection	-3860.283335	0.04749	1.00000	0.04749	1.00000	0.04749	1.00000	999.00000	999.00000	411_S_0.972*;	Rab3 GTPase-activating protein catalytic subunit	Camponotus floridanus	GO:0005096|GTPase activator activity|IEA; GO:0043547|positive regulation of GTPase activity|IEA
FEX_0012646-mRNA12	F3x4	PositiveSelection	-5750.913396	0.06429	1.00000	0.06429	1.00000	0.06429	1.00000	999.00000	999.00000	1_E_0.501;2_T_0.996**;3_F_0.987*;4_S_0.993**;5_P_0.596;44_S_0.648;200_Q_0.605;579_A_0.668;609_S_0.613;	Chaoptin	Camponotus floridanus	GO:0016020|membrane|IEA; GO:0016021|integral to membrane|IEA
FEX_0012763-mRNA1	F3x4	PositiveSelection	-3068.746767	0.01027	1.00000	0.01027	1.00000	0.01027	1.00000	998.99899	998.99899	1_N_0.969*;2_V_0.602;3_L_0.574;4_V_0.835;96_S_0.636;	Cytoplasmic dynein 1 light intermediate chain 2	Camponotus floridanus	GO:0003777|microtubule motor activity|IEA; GO:0005868|cytoplasmic dynein complex|IEA; GO:0007018|microtubule-based movement|IEA; GO:0008152|metabolic process|IEA
FEX_0001676-mRNA1	F3x4	PositiveSelection	-1620.551694	0.08655	1.00000	0.08655	1.00000	0.08655	1.00000	998.96060	998.96060	48_V_0.687;63_C_0.504;112_L_0.510;116_P_0.560;117_S_0.898;118_V_0.936;119_F_0.971*;120_G_0.679;122_Q_0.721;124_T_0.546;126_E_0.991**;129_E_0.989*;132_K_0.915;133_K_0.826;134_M_0.945;137_L_0.906;	Globin	Camponotus floridanus	GO:0005344|oxygen transporter activity|IEA; GO:0005506|iron ion binding|IEA; GO:0005576|extracellular region|IEA; GO:0005833|hemoglobin complex|IEA; GO:0006810|transport|IEA; GO:0015671|oxygen transport|IEA; GO:0019825|oxygen binding|IEA; GO:0020037|heme binding|IEA
FEX_0012520-mRNA1	F3x4	PositiveSelection	-1333.122297	0.05520	1.00000	0.05520	1.00000	0.05520	1.00000	245.99800	245.99800	3_S_0.517;4_A_0.965*;9_L_0.586;17_P_0.959*;33_L_0.506;44_S_0.637;53_F_0.996**;54_S_0.915;55_V_1.000**;56_L_0.997**;57_Q_1.000**;58_Q_0.983*;59_P_0.993**;60_D_1.000**;61_S_1.000**;63_S_0.994**;64_P_0.996**;65_A_1.000**;66_I_1.000**;67_S_1.000**;68_D_1.000**;69_M_0.998**;70_S_0.994**;71_F_0.991**;72_P_0.990**;73_S_1.000**;74_Q_0.998**;75_Q_0.959*;76_E_0.999**;77_N_0.999**;78_S_0.999**;79_H_0.985*;8…	Homeobox protein Nkx-2.2a	Lasius niger	GO:0003677|DNA binding|IEA; GO:0005634|nucleus|IEA; GO:0006355|regulation of transcription, DNA-dependent|IEA; GO:0043565|sequence-specific DNA binding|IEA
FEX_0003874-mRNA1	F3x4	PositiveSelection	-6886.147047	0.03859	1.00000	0.03859	1.00000	0.03859	1.00000	8.55068	8.55068	51_E_0.630;63_P_0.600;121_L_0.696;556_Q_0.550;557_P_0.643;602_S_0.967*;644_M_0.990**;667_E_0.550;670_A_0.621;677_Q_0.585;687_S_0.865;702_R_0.528;759_D_0.582;	Ubiquitin carboxyl-terminal hydrolase 5	Camponotus floridanus	GO:0006508|proteolysis|IEA; GO:0006511|ubiquitin-dependent protein catabolic process|IEA; GO:0008233|peptidase activity|IEA; GO:0008234|cysteine-type peptidase activity|IEA; GO:0008242|omega peptidase activity|IEA; GO:0008270|zinc ion binding|IEA; GO:0016579|protein deubiquitination|IEA; GO:0016787|hydrolase activity|IEA; GO:0036459||IEA; GO:0046872|metal ion binding|IEA
FEX_0004150-mRNA1	F3x4	PositiveSelection	-4480.857747	0.05487	1.00000	0.05487	1.00000	0.05487	1.00000	999.00000	999.00000	10_A_0.836;22_A_0.850;47_E_0.617;79_V_0.846;106_S_0.632;127_G_0.813;153_S_0.982*;154_N_0.993**;155_D_0.927;156_D_0.829;185_M_0.702;236_A_0.714;238_A_0.802;281_G_0.918;282_V_0.624;295_S_0.946;333_A_0.838;421_T_0.531;422_V_1.000**;423_F_0.998**;424_D_1.000**;425_Q_1.000**;426_G_0.934;427_L_0.999**;428_K_0.990*;429_A_0.999**;430_I_1.000**;431_S_0.942;433_S_0.999**;434_V_0.902;435_D_0.916;436_L_0.951…	Cysteine proteinase	Lasius niger	GO:0004869|cysteine-type endopeptidase inhibitor activity|IEA; GO:0006508|proteolysis|IEA; GO:0008234|cysteine-type peptidase activity|IEA; GO:0010466|negative regulation of peptidase activity|IEA; GO:0010951|negative regulation of endopeptidase activity|IEA; GO:0030414|peptidase inhibitor activity|IEA
FEX_0008580-mRNA1	F3x4	PositiveSelection	-10084.815993	0.05351	1.00000	0.05351	1.00000	0.05351	1.00000	1.54175	1.54175	5_K_0.586;48_V_0.630;117_V_0.570;170_Y_0.585;187_V_0.572;271_V_0.571;536_L_0.565;683_Y_0.596;912_T_0.587;915_L_0.593;917_N_0.610;919_A_0.569;927_M_0.564;932_G_0.923;934_T_0.573;937_A_0.586;960_M_0.552;1074_I_0.626;1117_N_0.955*;1118_A_0.579;1119_A_0.624;1122_T_0.554;1129_M_0.534;1131_K_0.618;1168_L_0.571;	Alpha-2-macroglobulin-like protein 1	Camponotus floridanus	GO:0004866|endopeptidase inhibitor activity|IEA; GO:0005576|extracellular region|IEA; GO:0005615|extracellular space|IEA; GO:0010951|negative regulation of endopeptidase activity|IEA
FEX_0003890-mRNA4	F3x4	PositiveSelection	-3910.127909	0.05212	1.00000	0.05212	1.00000	0.05212	1.00000	220.60903	220.60903	10_R_0.509;33_I_0.512;117_H_0.631;207_P_0.503;221_S_0.565;222_I_0.594;287_L_0.625;315_G_0.774;357_Q_0.714;369_P_0.514;375_W_0.588;424_G_0.748;425_A_0.999**;426_D_0.561;427_I_0.791;428_S_0.909;429_Q_0.997**;430_A_0.990*;431_N_1.000**;432_A_0.986*;433_D_0.999**;434_G_0.992**;435_R_0.726;436_T_0.997**;437_A_0.974*;439_H_0.991**;440_I_0.949;441_A_0.998**;442_C_0.538;443_L_0.885;444_L_0.710;	L-asparaginase-like protein	Lasius niger	GO:0004067|asparaginase activity|IEA; GO:0006520|cellular amino acid metabolic process|IEA
FEX_0005322-mRNA4	F3x4	PositiveSelection	-4197.015583	0.04436	1.00000	0.04436	1.00000	0.04436	1.00000	15.56161	15.56161	240_G_0.501;245_Y_0.942;329_Q_0.938;330_N_0.985*;350_S_0.528;	Afadin	Camponotus floridanus	GO:0007165|signal transduction|IEA
FEX_0010555-mRNA1	F3x4	PositiveSelection	-2035.347150	0.03266	1.00000	0.03266	1.00000	0.03266	1.00000	511.73701	511.73701	1_L_0.848;7_E_0.801;8_L_0.728;9_Y_0.911;11_K_0.875;14_E_0.996**;16_I_0.999**;17_N_0.846;19_R_0.882;20_L_0.820;21_R_0.612;22_K_0.850;23_K_0.617;24_L_0.873;25_D_0.992**;26_I_0.978*;30_E_0.983*;31_K_0.992**;32_E_0.881;33_K_0.989*;34_H_0.982*;35_E_0.843;36_H_0.907;37_T_0.890;38_L_0.887;39_N_0.927;40_I_0.564;41_L_0.932;42_Q_0.986*;43_T_0.795;44_E_0.983*;45_S_0.988*;47_E_0.624;48_H_0.801;49_C_0.652;50_…	Trichoplein multi-domain protein	Pogonomyrmex barbatus	NA
FEX_0005420-mRNA1	F3x4	PositiveSelection	-2433.043740	0.05317	1.00000	0.05317	1.00000	0.05317	1.00000	15.16180	15.16180	2_F_0.985*;3_N_0.805;4_D_0.978*;6_V_0.979*;7_A_0.792;13_F_0.539;16_Q_0.757;34_E_0.825;52_S_0.849;94_Q_0.809;123_I_0.714;138_L_0.836;146_V_0.543;162_R_0.753;172_A_0.840;174_H_0.812;182_Y_0.561;186_K_0.859;189_E_0.667;191_A_0.783;192_N_0.999**;198_C_0.893;206_A_0.995**;213_T_0.512;219_Y_0.506;221_R_0.897;222_R_0.681;	Otopetrin-2	Wasmannia auropunctata	GO:0016020|membrane|IEA; GO:0016021|integral to membrane|IEA
FEX_0009398-mRNA4	F3x4	PositiveSelection	-8302.411343	0.15150	1.00000	0.15150	1.00000	0.15150	1.00000	81.71777	81.71777	1_L_0.612;6_D_0.892;8_T_0.767;10_I_0.988*;11_F_0.505;12_N_0.983*;14_V_0.956*;17_E_0.984*;20_K_0.939;21_P_0.792;23_S_0.840;24_I_0.618;26_L_0.852;27_P_0.887;28_P_0.589;32_S_0.616;33_K_0.732;39_C_0.920;40_K_0.777;44_E_0.558;46_T_0.790;48_G_0.966*;49_R_0.697;50_N_0.987*;52_M_0.592;53_I_0.969*;54_T_0.854;55_K_0.859;57_A_0.565;58_N_0.693;61_S_0.573;62_L_0.961*;113_C_0.973*;122_M_0.722;223_I_0.584;232_F…	EpsG multi-domain protein	Camponotus floridanus	NA
FEX_0009402-mRNA1	F3x4	PositiveSelection	-11321.827389	0.03830	1.00000	0.03830	1.00000	0.03830	1.00000	999.00000	999.00000	206_L_0.577;481_T_0.678;1295_V_0.875;1296_Q_0.993**;1297_N_0.982*;1299_K_0.641;1301_K_0.987*;1302_S_0.591;1304_N_0.996**;1306_S_0.986*;1308_S_0.972*;1310_A_0.919;1311_F_0.967*;	Histone-lysine N-methyltransferase	Lasius niger	GO:0003677|DNA binding|IEA; GO:0003682|chromatin binding|IEA; GO:0005634|nucleus|IEA; GO:0008168|methyltransferase activity|IEA; GO:0008270|zinc ion binding|IEA; GO:0016740|transferase activity|IEA; GO:0018024|histone-lysine N-methyltransferase activity|IEA; GO:0032259|methylation|IEA; GO:0034968|histone lysine methylation|IEA; GO:0046872|metal ion binding|IEA
FEX_0009399-mRNA3	F3x4	PositiveSelection	-5086.204427	0.09842	1.00000	0.09842	1.00000	0.09842	1.00000	30.47325	30.47325	31_R_0.680;79_K_0.632;90_K_0.976*;172_T_0.513;	IQ and AAA domain-containing protein	Camponotus floridanus	GO:0005524|ATP binding|IEA
FEX_0005411-mRNA6	F3x4	PositiveSelection	-995.467904	0.06055	1.00000	0.06055	1.00000	0.06055	1.00000	29.71586	29.71586	29_G_0.962*;91_S_0.682;	Outer dense fiber protein 3	Camponotus floridanus	NA
FEX_0004095-mRNA1	F3x4	PositiveSelection	-4407.049778	0.17764	1.00000	0.17764	1.00000	0.17764	1.00000	79.03203	79.03203	115_Y_0.959*;459_G_0.825;460_S_0.930;461_Q_0.963*;462_K_0.951*;463_A_0.936;464_I_0.968*;465_C_0.709;	Solute carrier organic anion transporter family member 2B1	Camponotus floridanus	GO:0005215|transporter activity|IEA; GO:0006810|transport|IEA; GO:0016020|membrane|IEA; GO:0016021|integral to membrane|IEA
FEX_0004022-mRNA1	F3x4	PositiveSelection	-3431.373188	0.11188	1.00000	0.11188	1.00000	0.11188	1.00000	127.38969	127.38969	33_V_0.710;129_K_0.817;132_R_0.746;360_E_1.000**;362_I_0.836;363_D_0.995**;364_G_0.907;365_K_0.745;366_L_0.975*;367_F_0.842;368_E_0.990*;369_S_0.985*;371_L_0.997**;372_K_0.999**;373_L_0.999**;374_T_0.981*;375_D_0.723;376_V_0.924;377_A_0.805;378_M_1.000**;379_K_0.703;380_K_0.999**;381_S_0.999**;382_F_0.775;383_N_0.996**;384_N_0.994**;	Endothelin-converting enzyme 1	Camponotus floridanus	GO:0004222|metalloendopeptidase activity|IEA; GO:0006508|proteolysis|IEA; GO:0008237|metallopeptidase activity|IEA; GO:0016020|membrane|IEA; GO:0016021|integral to membrane|IEA
FEX_0004018-mRNA1	F3x4	PositiveSelection	-2652.494859	0.02445	1.00000	0.02445	1.00000	0.02445	1.00000	14.69994	14.69994	158_G_0.951*;	PREDICTED: protein bric-a-brac 2 isoform X1	Camponotus floridanus	NA
FEX_0004440-mRNA1	F3x4	PositiveSelection	-6753.823169	0.06201	1.00000	0.06201	1.00000	0.06201	1.00000	133.35359	133.35359	10_Q_0.729;17_V_0.716;94_P_0.781;270_H_0.735;297_A_0.841;307_K_0.531;348_P_0.754;362_L_0.851;387_T_0.646;548_S_0.775;645_D_0.977*;647_F_0.798;648_T_0.999**;649_L_0.993**;650_A_0.995**;651_N_0.905;652_D_0.738;653_T_0.999**;655_S_0.999**;656_L_0.955*;657_T_1.000**;658_H_0.986*;659_D_0.992**;660_L_0.952*;661_M_0.914;662_N_0.811;663_C_0.889;664_P_0.918;665_C_0.997**;667_G_0.980*;668_N_0.944;669_E_0.9…	Dna repair and recombination protein rad54b-like protein	Camponotus floridanus	GO:0005524|ATP binding|IEA
FEX_0004744-mRNA1	F3x4	PositiveSelection	-10372.519309	0.08951	1.00000	0.08951	1.00000	0.08951	1.00000	170.64573	170.64573	131_R_0.640;139_F_0.656;235_V_0.720;296_P_0.659;349_T_0.586;460_V_0.946;486_P_0.514;493_A_0.579;495_L_0.582;522_T_0.501;527_E_0.504;576_K_0.525;680_E_0.517;698_L_0.503;725_A_0.504;795_Q_0.570;1030_Y_0.666;1031_Q_0.772;1032_P_0.993**;1035_W_0.964*;1036_T_0.994**;1038_S_0.986*;1039_V_0.842;1040_L_0.620;	PAP2_C multi-domain protein	Linepithema humile	NA
FEX_0006125-mRNA1	F3x4	PositiveSelection	-3228.521732	0.09739	1.00000	0.09739	1.00000	0.09739	1.00000	134.57851	134.57851	1_M_0.985*;2_S_0.982*;3_D_0.999**;4_K_0.961*;5_E_0.505;9_E_0.526;10_I_0.711;11_Q_0.935;13_I_0.891;14_S_0.935;15_E_0.999**;16_R_0.998**;17_L_0.501;18_Q_0.549;117_G_0.712;120_S_0.646;300_T_0.527;	Brisc and brca1-a complex member 1-like protein	Camponotus floridanus	GO:0045739|positive regulation of DNA repair|IEA; GO:0070531|BRCA1-A complex|IEA; GO:0070552|BRISC complex|IEA
FEX_0007665-mRNA1	F3x4	PositiveSelection	-2335.026184	0.03346	1.00000	0.03346	1.00000	0.03346	1.00000	1.77494	1.77494	8_D_0.957*;39_Y_0.561;230_S_0.580;	CCR4-NOT transcription complex subunit 6-like-B	Lasius niger	GO:0016020|membrane|IEA; GO:0016021|integral to membrane|IEA
FEX_0006123-mRNA1	F3x4	PositiveSelection	-1175.079661	0.00807	1.00000	0.00807	1.00000	0.00807	1.00000	97.24815	97.24815	5_A_0.641;106_Y_0.704;107_I_0.998**;108_P_0.999**;109_V_0.871;110_D_0.994**;111_I_1.000**;113_S_0.996**;114_I_0.936;115_A_0.997**;116_D_0.998**;	Pre-mRNA-processing factor 17	Solenopsis invicta	GO:0000398|nuclear mRNA splicing, via spliceosome|IEA; GO:0071013|catalytic step 2 spliceosome|IEA
FEX_0006118-mRNA4	F3x4	PositiveSelection	-2847.256383	0.01063	1.00000	0.01063	1.00000	0.01063	1.00000	999.00000	999.00000	22_Q_0.809;24_A_0.887;79_I_0.874;125_I_0.742;138_Q_0.807;336_D_0.541;337_L_0.858;338_R_0.685;339_L_0.997**;341_F_0.749;342_L_0.877;343_T_0.999**;344_L_0.999**;345_L_1.000**;346_A_0.998**;348_V_0.935;349_V_0.999**;350_A_0.999**;351_G_1.000**;354_S_0.787;355_L_0.996**;356_V_0.699;357_T_0.997**;358_A_1.000**;359_R_0.997**;360_Q_0.999**;362_L_0.822;364_T_0.999**;365_M_0.939;366_A_0.999**;368_V_1.000*…	Transmembrane protein 181	Camponotus floridanus	NA
FEX_0001433-mRNA1	F3x4	PositiveSelection	-2986.143896	0.02487	1.00000	0.02487	1.00000	0.02487	1.00000	656.30620	656.30620	51_D_0.535;387_V_0.993**;388_S_0.998**;389_H_0.979*;390_V_0.909;391_S_0.995**;392_T_0.965*;393_G_0.998**;394_G_0.994**;	Phosphoglycerate kinase	Solenopsis invicta	GO:0004618|phosphoglycerate kinase activity|IEA; GO:0006096|glycolysis|IEA; GO:0016301|kinase activity|IEA; GO:0016310|phosphorylation|IEA; GO:0016740|transferase activity|IEA
FEX_0001442-mRNA1	F3x4	PositiveSelection	-2035.980575	0.02761	1.00000	0.02761	1.00000	0.02761	1.00000	276.60500	276.60500	8_P_0.507;117_P_0.774;286_G_0.995**;287_T_0.983*;288_N_0.990**;289_N_0.998**;290_D_0.982*;291_P_0.999**;292_F_0.989*;	N-acetyllactosaminide beta--n-acetylglucosaminyltransferase-like protein	Lasius niger	GO:0008152|metabolic process|IEA; GO:0016020|membrane|IEA; GO:0016021|integral to membrane|IEA; GO:0016740|transferase activity|IEA; GO:0016757|transferase activity, transferring glycosyl groups|IEA
FEX_0005204-mRNA1	F3x4	PositiveSelection	-545.242203	0.02381	1.00000	0.02381	1.00000	0.02381	1.00000	8.30513	8.30513	50_A_0.970*;	Lipoma HMGIC fusion partner-like 2 protein	Acromyrmex echinatior	GO:0016020|membrane|IEA; GO:0016021|integral to membrane|IEA
FEX_0005203-mRNA4	F3x4	PositiveSelection	-1130.450465	0.05365	1.00000	0.05365	1.00000	0.05365	1.00000	621.17625	621.17625	2_Y_0.751;3_E_0.999**;4_N_1.000**;6_F_0.988*;56_K_0.525;111_K_0.572;112_Y_0.749;113_V_0.985*;114_R_0.991**;115_D_0.973*;117_S_0.951*;120_H_0.997**;121_R_0.990**;	Gamma-glutamylcyclotransferase	Cerapachys biroi	GO:0008152|metabolic process|IEA; GO:0016740|transferase activity|IEA
FEX_0001463-mRNA1	F3x4	PositiveSelection	-4707.803505	0.07909	1.00000	0.07909	1.00000	0.07909	1.00000	32.76253	32.76253	7_V_0.982*;41_E_0.598;94_A_0.512;146_T_0.584;301_G_0.524;316_P_0.612;437_K_0.967*;442_K_0.546;450_T_0.632;451_I_0.832;	G-protein coupled receptor mth2	Lasius niger	GO:0016020|membrane|IEA; GO:0016021|integral to membrane|IEA
FEX_0008366-mRNA1	F3x4	PositiveSelection	-1024.229529	0.00244	1.00000	0.00244	1.00000	0.00244	1.00000	86.34136	86.34136	37_V_0.864;73_S_0.755;84_G_0.542;130_E_0.853;131_T_0.989*;132_S_0.880;133_Y_1.000**;134_S_0.999**;135_C_1.000**;136_V_1.000**;	Proliferating cell nuclear antigen	Pogonomyrmex barbatus	GO:0003677|DNA binding|IEA; GO:0005634|nucleus|IEA; GO:0006260|DNA replication|IEA; GO:0006275|regulation of DNA replication|IEA; GO:0030337|DNA polymerase processivity factor activity|IEA
FEX_0008369-mRNA1	F3x4	PositiveSelection	-1701.103720	0.01214	1.00000	0.01214	1.00000	0.01214	1.00000	52.41068	52.41068	211_L_0.700;233_E_0.997**;234_L_0.979*;	Palmitoyltransferase	Camponotus floridanus	GO:0008152|metabolic process|IEA; GO:0008270|zinc ion binding|IEA; GO:0016020|membrane|IEA; GO:0016021|integral to membrane|IEA; GO:0016740|transferase activity|IEA; GO:0016746|transferase activity, transferring acyl groups|IEA; GO:0019706|protein-cysteine S-palmitoleyltransferase activity|IEA; GO:0046872|metal ion binding|IEA
FEX_0000773-mRNA1	F3x4	PositiveSelection	-3789.543484	0.05822	1.00000	0.05822	1.00000	0.05822	1.00000	998.99924	998.99924	459_P_0.667;461_P_0.674;463_Q_0.640;464_P_0.967*;	Metastasis-associated protein MTA1	Camponotus floridanus	GO:0003676|nucleic acid binding|IEA; GO:0003677|DNA binding|IEA; GO:0003682|chromatin binding|IEA; GO:0003700|sequence-specific DNA binding transcription factor activity|IEA; GO:0005634|nucleus|IEA; GO:0006355|regulation of transcription, DNA-dependent|IEA; GO:0008270|zinc ion binding|IEA; GO:0043565|sequence-specific DNA binding|IEA; GO:0046872|metal ion binding|IEA
FEX_0003431-mRNA1	F3x4	PositiveSelection	-2169.344775	0.05395	1.00000	0.05395	1.00000	0.05395	1.00000	998.99886	998.99886	1_L_0.588;2_I_0.851;3_G_0.998**;4_T_0.756;5_F_0.764;6_N_0.851;86_E_0.717;150_I_0.537;	3-hydroxyisobutyryl-CoA hydrolase, mitochondrial	Camponotus floridanus	GO:0008152|metabolic process|IEA; GO:0016787|hydrolase activity|IEA; GO:0016836|hydro-lyase activity|IEA
FEX_0011464-mRNA1	F3x4	PositiveSelection	-7497.972270	0.06823	1.00000	0.06823	1.00000	0.06823	1.00000	998.99983	998.99983	1_G_0.982*;254_R_0.526;286_T_0.507;299_S_0.531;322_K_0.569;351_S_0.579;356_K_0.501;361_S_0.504;597_R_0.599;610_S_0.607;620_E_0.572;	Protein kinase C-binding protein 1	Camponotus floridanus	GO:0016301|kinase activity|IEA; GO:0016310|phosphorylation|IEA; GO:0046872|metal ion binding|IEA
FEX_0007765-mRNA1	F3x4	PositiveSelection	-3755.913960	0.07102	1.00000	0.07102	1.00000	0.07102	1.00000	212.25891	212.25891	24_H_0.757;44_T_0.810;83_S_0.645;189_V_0.512;235_R_0.698;298_R_0.763;320_K_0.666;332_V_0.663;428_K_0.999**;429_K_0.968*;430_V_0.819;431_T_0.999**;432_E_0.999**;433_P_0.798;434_V_0.907;435_K_0.504;436_N_0.947;437_F_0.842;	[R] COG1100 GTPase SAR1 and related small G proteins	Camponotus floridanus	NA
FEX_0003059-mRNA1	F3x4	PositiveSelection	-580.063210	0.07828	1.00000	0.07828	1.00000	0.07828	1.00000	999.00000	999.00000	47_G_0.989*;76_A_0.947;77_T_0.991**;78_I_0.991**;79_E_1.000**;80_Q_0.999**;	Protein spitz	Camponotus floridanus	GO:0016020|membrane|IEA; GO:0016021|integral to membrane|IEA
FEX_0004368-mRNA1	F3x4	PositiveSelection	-8776.576818	0.09151	1.00000	0.09151	1.00000	0.09151	1.00000	14.84476	14.84476	48_S_0.510;56_S_1.000**;57_S_0.808;91_S_0.839;97_A_0.708;108_D_0.949;109_S_0.957*;134_N_0.614;145_P_0.581;162_R_0.547;167_S_0.809;174_R_0.967*;201_S_0.746;237_T_0.574;265_I_0.627;266_S_0.808;268_E_0.976*;278_S_0.794;282_H_0.650;284_D_0.751;297_D_0.777;303_L_0.787;318_S_0.795;326_D_0.751;336_A_0.729;338_D_0.564;360_E_0.517;361_K_0.854;381_D_0.752;384_K_0.792;395_K_0.641;426_I_0.528;428_H_0.828;431…	EpsG multi-domain protein	Camponotus floridanus	NA
FEX_0003057-mRNA1	F3x4	PositiveSelection	-4866.931052	0.00727	1.00000	0.00727	1.00000	0.00727	1.00000	999.00000	999.00000	663_S_0.965*;	Coatomer subunit gamma	Lasius niger	GO:0000139|Golgi membrane|IEA; GO:0005198|structural molecule activity|IEA; GO:0005737|cytoplasm|IEA; GO:0005794|Golgi apparatus|IEA; GO:0006810|transport|IEA; GO:0006886|intracellular protein transport|IEA; GO:0015031|protein transport|IEA; GO:0016020|membrane|IEA; GO:0016192|vesicle-mediated transport|IEA; GO:0030117|membrane coat|IEA; GO:0030126|COPI vesicle coat|IEA; GO:0030663|COPI coated ve…
FEX_0004406-mRNA1	F3x4	PositiveSelection	-2682.938943	0.00834	1.00000	0.00834	1.00000	0.00834	1.00000	28.91276	28.91276	2_A_0.553;5_T_0.847;17_M_0.766;30_D_0.935;32_A_0.998**;126_T_0.587;162_D_0.895;177_M_0.766;201_V_0.922;203_D_0.909;241_G_0.830;242_V_0.973*;287_N_0.910;320_S_0.876;337_E_0.829;341_A_0.943;349_G_0.991**;350_K_1.000**;351_A_0.999**;352_T_0.895;353_W_0.928;354_D_0.998**;355_K_0.998**;356_L_1.000**;357_F_0.924;358_E_0.998**;359_P_1.000**;360_P_0.999**;361_N_0.999**;362_F_0.919;363_F_0.990*;364_G_0.99…	Poly(A) polymerase gamma	Camponotus floridanus	GO:0003723|RNA binding|IEA; GO:0004652|polynucleotide adenylyltransferase activity|IEA; GO:0005634|nucleus|IEA; GO:0016779|nucleotidyltransferase activity|IEA; GO:0031123|RNA 3'-end processing|IEA; GO:0043631|RNA polyadenylation|IEA
FEX_0007198-mRNA1	F3x4	PositiveSelection	-3482.078014	0.00000	1.00000	0.00000	1.00000	0.00000	1.00000	999.00000	999.00000	38_T_0.968*;39_T_0.526;	Synaptotagmin 1 isoform x1	Lasius niger	GO:0016020|membrane|IEA; GO:0016021|integral to membrane|IEA
FEX_0010850-mRNA1	F3x4	PositiveSelection	-920.423457	0.00000	1.00000	0.00000	1.00000	0.00000	1.00000	999.00000	999.00000	1_D_1.000**;2_A_0.937;3_T_0.993**;4_V_0.991**;5_A_0.998**;6_C_0.948;8_Q_0.886;9_C_0.999**;10_E_0.999**;30_A_0.927;45_T_0.738;48_S_0.939;106_Q_0.750;107_L_0.867;108_N_0.845;	Tripartite motif-containing protein 9	Lasius niger	GO:0005622|intracellular|IEA; GO:0008270|zinc ion binding|IEA; GO:0046872|metal ion binding|IEA
FEX_0004073-mRNA1	F3x4	PositiveSelection	-5435.944094	0.01345	1.00000	0.01345	1.00000	0.01345	1.00000	208.05738	208.05738	236_K_0.564;255_G_0.774;633_M_0.716;669_S_0.662;703_N_0.679;706_F_0.946;707_R_0.891;708_A_0.999**;709_S_0.995**;710_S_0.995**;711_D_1.000**;712_H_0.995**;713_T_0.993**;714_W_0.995**;715_E_0.545;716_Q_0.993**;717_T_0.995**;719_T_1.000**;720_P_0.997**;	ATP-dependent RNA helicase DDX42	Camponotus floridanus	GO:0000166|nucleotide binding|IEA; GO:0003676|nucleic acid binding|IEA; GO:0004386|helicase activity|IEA; GO:0005524|ATP binding|IEA; GO:0008152|metabolic process|IEA; GO:0016787|hydrolase activity|IEA
FEX_0006621-mRNA1	F3x4	PositiveSelection	-3591.902013	0.07496	1.00000	0.07496	1.00000	0.07496	1.00000	6.89067	6.89067	18_N_0.534;156_G_0.963*;192_V_0.528;207_K_0.571;323_E_0.628;325_C_0.625;328_K_0.944;	Prolactin-releasing peptide receptor	Camponotus floridanus	GO:0004871|signal transducer activity|IEA; GO:0004930|G-protein coupled receptor activity|IEA; GO:0004983|neuropeptide Y receptor activity|IEA; GO:0007165|signal transduction|IEA; GO:0007186|G-protein coupled receptor signaling pathway|IEA; GO:0007218|neuropeptide signaling pathway|IEA; GO:0016020|membrane|IEA; GO:0016021|integral to membrane|IEA
FEX_0013567-mRNA1	F3x4	PositiveSelection	-1006.932571	0.02324	1.00000	0.02324	1.00000	0.02324	1.00000	33.05284	33.05284	67_F_0.818;96_S_0.989*;	UDP-xylose and UDP-N-acetylglucosamine transporter-like	Camponotus floridanus	GO:0006810|transport|IEA; GO:0016020|membrane|IEA; GO:0016021|integral to membrane|IEA; GO:0055085|transmembrane transport|IEA
FEX_0009103-mRNA5	F3x4	PositiveSelection	-4708.052603	0.03366	1.00000	0.03366	1.00000	0.03366	1.00000	263.67956	263.67956	8_T_0.862;30_Q_0.955*;52_I_0.869;134_D_0.893;185_A_0.896;210_A_0.895;245_N_0.803;251_M_0.830;261_I_0.529;281_S_0.991**;286_H_0.835;340_D_0.775;448_Y_1.000**;449_W_0.999**;450_N_1.000**;451_Y_0.999**;452_M_0.994**;453_Y_0.962*;454_T_0.972*;455_T_0.958*;456_A_0.986*;458_P_0.999**;459_G_0.908;460_D_0.999**;462_K_0.999**;463_E_0.995**;465_V_1.000**;466_D_0.966*;467_E_0.916;468_H_1.000**;470_N_0.998**…	Exostosin-2	Solenopsis invicta	GO:0006024|glycosaminoglycan biosynthetic process|IEA; GO:0015012|heparan sulfate proteoglycan biosynthetic process|IEA; GO:0015020|glucuronosyltransferase activity|IEA; GO:0016020|membrane|IEA; GO:0016021|integral to membrane|IEA
FEX_0006650-mRNA1	F3x4	PositiveSelection	-1955.261170	0.09569	1.00000	0.09569	1.00000	0.09569	1.00000	8.19491	8.19491	54_D_0.956*;100_I_0.669;109_Y_0.969*;114_D_0.593;125_A_0.576;169_E_0.679;170_T_0.728;	Poly(A) RNA polymerase, mitochondrial	Camponotus floridanus	NA
FEX_0000377-mRNA2	F3x4	PositiveSelection	-1406.924585	0.06915	1.00000	0.06915	1.00000	0.06915	1.00000	5.58739	5.58739	35_Q_0.578;60_T_0.958*;116_D_0.507;	polyprenyl_synt multi-domain protein	Camponotus floridanus	NA
FEX_0001299-mRNA1	F3x4	PositiveSelection	-1630.992572	0.03196	1.00000	0.03196	1.00000	0.03196	1.00000	7.53763	7.53763	27_Q_0.712;112_V_0.601;116_V_0.976*;140_G_0.505;	Glycerol-3-phosphate dehydrogenase [NAD(+)] (Fragment)	Lasius niger	GO:0004367|glycerol-3-phosphate dehydrogenase [NAD+] activity|IEA; GO:0005975|carbohydrate metabolic process|IEA; GO:0006072|glycerol-3-phosphate metabolic process|IEA; GO:0009331|glycerol-3-phosphate dehydrogenase complex|IEA; GO:0016491|oxidoreductase activity|IEA; GO:0016616|oxidoreductase activity, acting on the CH-OH group of donors, NAD or NADP as acceptor|IEA; GO:0042803|protein homodimeri…
FEX_0012038-mRNA1	F3x4	PositiveSelection	-22019.796573	0.10284	1.00000	0.10284	1.00000	0.10284	1.00000	59.77542	59.77542	444_P_0.708;514_A_0.882;824_Q_0.994**;1045_S_0.971*;1046_S_0.842;1047_I_0.880;1048_S_0.876;1049_T_0.825;1050_E_0.909;1051_N_0.962*;1257_Y_0.962*;1342_S_0.976*;1382_A_0.648;1396_M_0.546;1403_F_0.963*;1734_S_0.508;1907_E_0.993**;1908_S_0.981*;1909_S_0.890;	Centrosome-associated protein 350	Camponotus floridanus	NA
FEX_0013473-mRNA1	F3x4	PositiveSelection	-2589.519889	0.10819	1.00000	0.10819	1.00000	0.10819	1.00000	998.99863	998.99863	47_L_0.548;289_D_0.997**;290_S_0.978*;292_F_0.966*;293_W_0.952*;	RCC1 domain-containing protein 1	Lasius niger	NA
FEX_0012041-mRNA1	F3x4	PositiveSelection	-6103.361661	0.09168	1.00000	0.09168	1.00000	0.09168	1.00000	2.63631	2.63631	27_K_0.607;96_T_0.625;105_K_0.602;126_G_0.693;140_I_0.616;215_R_0.628;219_E_0.958*;282_I_0.613;370_S_0.636;423_R_0.853;478_F_0.666;503_E_0.669;536_P_0.659;596_M_0.519;598_S_0.649;622_V_0.601;636_D_0.639;	EpsG domain containing protein	Camponotus floridanus	NA
FEX_0011563-mRNA1	F3x4	PositiveSelection	-5654.394483	0.04079	1.00000	0.04079	1.00000	0.04079	1.00000	999.00000	999.00000	101_Q_0.671;225_I_0.593;246_A_0.607;538_I_0.549;688_A_0.996**;689_N_0.995**;690_F_0.764;691_A_0.999**;692_V_1.000**;693_Y_0.999**;694_P_0.792;695_N_0.999**;696_R_0.575;697_E_0.999**;698_M_0.999**;699_A_0.995**;700_A_0.632;	Dynactin subunit 1	Lasius niger	GO:0005869|dynactin complex|IEA; GO:0010970|microtubule-based transport|IEA; GO:0045502|dynein binding|IEA
FEX_0011571-mRNA1	F3x4	PositiveSelection	-1950.431313	0.11206	1.00000	0.11206	1.00000	0.11206	1.00000	71.71626	71.71626	1_Q_0.964*;4_S_0.955*;10_M_0.606;14_Q_0.989*;16_V_0.632;18_V_0.608;22_T_0.520;37_E_0.689;39_K_0.759;53_I_0.613;72_S_0.677;73_K_0.532;99_N_0.500;123_Q_0.865;124_S_0.600;168_Y_0.577;170_V_0.975*;171_S_0.989*;172_N_0.667;173_T_0.779;174_E_0.989*;175_E_0.947;176_L_0.683;178_D_0.987*;180_S_0.999**;181_F_0.999**;	EpsG domain containing protein	Camponotus floridanus	NA
FEX_0011187-mRNA1	F3x4	PositiveSelection	-3567.581256	0.10568	1.00000	0.10568	1.00000	0.10568	1.00000	526.67244	526.67244	1_I_0.592;2_Q_0.983*;3_E_0.975*;5_V_0.570;6_A_0.616;7_A_0.999**;8_F_0.797;9_V_0.515;10_N_0.797;11_A_0.994**;12_L_0.777;13_K_0.989*;14_I_0.833;15_S_0.996**;16_L_0.815;17_M_1.000**;18_T_0.900;19_E_0.996**;20_F_0.976*;21_S_0.960*;22_H_0.719;23_L_0.998**;24_S_0.999**;25_D_0.965*;26_E_0.695;27_E_0.988*;29_E_0.738;32_R_0.999**;33_L_0.968*;34_N_0.797;35_K_1.000**;36_A_0.875;37_E_0.843;38_R_1.000**;39_R_…	Glutamate receptor delta-2 subunit	Camponotus floridanus	GO:0004970|ionotropic glutamate receptor activity|IEA; GO:0016020|membrane|IEA; GO:0016021|integral to membrane|IEA; GO:0035235|ionotropic glutamate receptor signaling pathway|IEA
FEX_0008842-mRNA5	F3x4	PositiveSelection	-7028.819129	0.03982	1.00000	0.03982	1.00000	0.03982	1.00000	3.18949	3.18949	211_T_0.564;215_I_0.842;234_S_0.953*;237_V_0.543;286_S_0.566;666_L_0.593;683_A_0.561;705_M_0.588;729_V_0.520;766_D_0.550;789_P_0.575;799_R_0.545;	Nitric oxide synthase	Camponotus floridanus	GO:0004517|nitric-oxide synthase activity|IEA; GO:0005506|iron ion binding|IEA; GO:0005516|calmodulin binding|IEA; GO:0006809|nitric oxide biosynthetic process|IEA; GO:0010181|FMN binding|IEA; GO:0016491|oxidoreductase activity|IEA; GO:0020037|heme binding|IEA; GO:0046872|metal ion binding|IEA; GO:0050660|flavin adenine dinucleotide binding|IEA; GO:0050661|NADP binding|IEA; GO:0055114|oxidation-r…
FEX_0007027-mRNA3	F3x4	PositiveSelection	-280.244847	0.01171	1.00000	0.01171	1.00000	0.01171	1.00000	10.77527	10.77527	1_V_0.846;2_N_0.999**;3_A_1.000**;4_V_0.970*;5_S_0.999**;6_A_0.993**;7_C_1.000**;8_F_1.000**;9_M_0.999**;10_T_0.997**;11_H_0.933;12_M_0.998**;16_S_0.962*;	Protein fem-1-like protein C	Camponotus floridanus	NA
FEX_0000207-mRNA1	F3x4	PositiveSelection	-2580.361565	0.04704	1.00000	0.04704	1.00000	0.04704	1.00000	149.36127	149.36127	237_E_0.541;266_S_0.997**;267_S_0.997**;268_F_0.997**;269_V_0.631;272_N_0.982*;273_D_0.927;274_V_0.776;275_S_0.979*;276_D_0.639;277_V_0.953*;278_R_0.853;279_S_0.712;280_N_1.000**;281_S_1.000**;282_T_0.994**;284_A_0.800;286_P_0.829;287_S_0.999**;289_I_0.957*;290_R_0.827;292_S_0.986*;293_R_0.631;294_T_0.846;295_S_0.995**;296_W_0.996**;297_Q_0.996**;	WD repeat-containing protein 32-like protein	Camponotus floridanus	NA
FEX_0012184-mRNA1	F3x4	PositiveSelection	-4110.885285	0.09093	1.00000	0.09093	1.00000	0.09093	1.00000	72.81861	72.81861	183_L_0.634;330_K_0.736;331_F_0.693;394_K_0.990*;395_T_0.984*;396_C_0.989*;397_N_0.905;	Ankyrin repeat and LEM domain-containing protein 1	Camponotus floridanus	NA
FEX_0013163-mRNA1	F3x4	PositiveSelection	-3952.055109	0.03004	1.00000	0.03004	1.00000	0.03004	1.00000	999.00000	999.00000	1_A_0.990**;3_Q_0.783;5_I_0.543;6_E_0.996**;7_G_0.999**;8_R_0.997**;10_L_0.998**;11_K_0.998**;12_L_0.997**;13_D_1.000**;14_S_1.000**;15_S_0.949;16_Y_0.767;17_G_0.968*;18_F_0.998**;19_Q_1.000**;130_T_0.582;220_S_0.626;241_M_0.579;321_P_0.673;343_T_0.666;	Gamma-tubulin complex component 3	Camponotus floridanus	GO:0000226|microtubule cytoskeleton organization|IEA; GO:0000922|spindle pole|IEA; GO:0005815|microtubule organizing center|IEA; GO:0090063|positive regulation of microtubule nucleation|IEA
FEX_0012186-mRNA1	F3x4	PositiveSelection	-4508.163577	0.08857	1.00000	0.08857	1.00000	0.08857	1.00000	67.80973	67.80973	249_S_0.643;438_S_0.623;442_S_0.593;488_V_0.974*;489_S_0.985*;490_G_0.799;491_G_0.996**;492_A_0.964*;493_G_0.991**;494_L_0.960*;495_I_0.645;497_Q_0.972*;	Diacylglycerol kinase	Camponotus floridanus	GO:0000166|nucleotide binding|IEA; GO:0004143|diacylglycerol kinase activity|IEA; GO:0005524|ATP binding|IEA; GO:0005622|intracellular|IEA; GO:0007205|protein kinase C-activating G-protein coupled receptor signaling pathway|IEA; GO:0016301|kinase activity|IEA; GO:0016310|phosphorylation|IEA; GO:0016740|transferase activity|IEA; GO:0035556|intracellular signal transduction|IEA
FEX_0013070-mRNA7	F3x4	PositiveSelection	-5637.341551	0.03494	1.00000	0.03494	1.00000	0.03494	1.00000	4.25002	4.25002	212_P_0.912;313_H_0.643;321_R_0.582;362_V_0.573;379_A_0.551;386_D_0.504;387_E_0.525;389_R_0.689;445_S_0.510;459_I_0.677;475_R_0.619;477_Q_0.625;479_Y_0.979*;492_L_0.613;630_V_0.613;	pfam02958, EcKinase, Ecdysteroid kinase	Camponotus floridanus	NA
FEX_0010651-mRNA1	F3x4	PositiveSelection	-3576.217575	0.01752	1.00000	0.01752	1.00000	0.01752	1.00000	999.00000	999.00000	2_P_0.999**;3_P_0.998**;4_L_0.864;5_L_0.979*;6_P_0.999**;8_K_0.999**;9_E_0.997**;10_L_0.998**;11_S_0.899;12_S_0.999**;13_D_0.990**;14_E_0.996**;15_L_1.000**;16_A_0.998**;17_E_0.998**;18_R_0.897;19_E_1.000**;20_R_0.990**;21_M_0.630;26_K_0.655;62_L_0.886;67_T_0.901;74_R_0.868;76_G_0.828;128_G_0.891;351_T_0.778;400_L_0.576;	Transcriptional repressor p66-alpha	Camponotus floridanus	NA
FEX_0003102-mRNA1	F3x4	PositiveSelection	-2907.729681	0.01850	1.00000	0.01850	1.00000	0.01850	1.00000	131.97579	131.97579	392_N_0.531;393_L_0.998**;394_A_0.990*;	Drf_FH1 multi-domain protein	Camponotus floridanus	NA
FEX_0000156-mRNA1	F3x4	PositiveSelection	-1570.492711	0.01334	1.00000	0.01334	1.00000	0.01334	1.00000	352.23753	352.23753	2_Q_0.999**;3_E_0.998**;4_F_0.999**;5_M_0.921;6_E_1.000**;7_L_0.999**;8_V_0.898;9_G_1.000**;10_R_1.000**;11_L_0.919;12_K_0.933;99_G_0.618;181_S_0.853;	Hd domain-containing protein 2-like protein	Lasius niger	NA
FEX_0005885-mRNA4	F3x4	PositiveSelection	-2294.065873	0.05591	1.00000	0.05591	1.00000	0.05591	1.00000	281.47219	281.47219	1_M_0.621;119_E_0.850;127_D_0.845;131_E_0.850;144_C_0.913;214_I_0.986*;215_Q_0.988*;216_N_0.850;217_D_0.865;218_L_0.991**;219_E_0.850;220_D_0.998**;221_P_0.996**;222_K_0.997**;223_A_0.884;224_L_0.863;225_S_0.866;226_G_0.833;227_C_0.947;229_H_0.905;230_E_0.924;231_N_0.913;232_T_0.999**;234_A_0.834;235_V_0.659;236_P_0.998**;237_Q_0.937;239_G_0.917;	DUF4205 domain containing protein	Polistes dominula	NA
FEX_0003286-mRNA1	F3x4	PositiveSelection	-2147.589497	0.01040	1.00000	0.01040	1.00000	0.01040	1.00000	998.99955	998.99955	160_L_0.682;259_A_0.683;276_S_0.987*;	Eukaryotic translation initiation factor 3 subunit G	Camponotus floridanus	GO:0000166|nucleotide binding|IEA; GO:0001731|formation of translation preinitiation complex|IEA; GO:0003676|nucleic acid binding|IEA; GO:0003723|RNA binding|IEA; GO:0003743|translation initiation factor activity|IEA; GO:0005737|cytoplasm|IEA; GO:0005852|eukaryotic translation initiation factor 3 complex|IEA; GO:0006412|translation|IEA; GO:0006413|translational initiation|IEA; GO:0006446|regulati…
FEX_0002041-mRNA1	F3x4	PositiveSelection	-2531.713121	0.04466	1.00000	0.04466	1.00000	0.04466	1.00000	999.00000	999.00000	1_M_0.799;2_G_0.831;3_K_0.875;4_V_0.787;5_S_0.690;7_Q_0.528;10_G_0.807;53_E_0.759;270_I_0.879;272_V_0.557;274_L_0.647;275_D_0.936;276_S_0.761;277_R_0.989*;278_N_0.943;279_T_0.944;	NAD kinase	Camponotus floridanus	GO:0003951|NAD+ kinase activity|IEA; GO:0006741|NADP biosynthetic process|IEA; GO:0008152|metabolic process|IEA; GO:0016301|kinase activity|IEA; GO:0016310|phosphorylation|IEA; GO:0019674|NAD metabolic process|IEA
FEX_0012126-mRNA2	F3x4	PositiveSelection	-4260.750466	0.08545	1.00000	0.08545	1.00000	0.08545	1.00000	829.76589	829.76589	255_T_0.763;320_T_0.921;321_S_0.999**;322_S_0.958*;323_E_0.917;324_L_0.939;326_I_0.885;328_S_0.999**;329_V_0.998**;330_S_1.000**;331_P_0.998**;332_P_0.798;333_Q_0.996**;334_Q_1.000**;335_Q_1.000**;336_Q_1.000**;337_Q_0.882;338_Q_0.977*;339_Q_1.000**;340_P_0.673;341_Q_1.000**;342_Q_0.866;344_Q_0.848;345_Q_0.534;346_S_0.817;347_S_0.868;350_T_0.813;352_S_0.997**;353_P_0.682;354_S_0.569;355_N_1.000**…	Segmentation protein paired	Camponotus floridanus	GO:0003677|DNA binding|IEA; GO:0005634|nucleus|IEA; GO:0006351|transcription, DNA-dependent|IEA; GO:0006355|regulation of transcription, DNA-dependent|IEA; GO:0007275|multicellular organismal development|IEA; GO:0043565|sequence-specific DNA binding|IEA
FEX_0002019-mRNA1	F3x4	PositiveSelection	-4415.294644	0.06281	1.00000	0.06281	1.00000	0.06281	1.00000	3.11047	3.11047	22_L_0.504;60_V_0.515;65_Q_0.775;74_G_0.994**;85_G_0.801;99_T_0.798;121_F_0.555;122_I_0.617;181_R_0.738;188_M_0.706;193_E_0.736;204_L_0.739;233_R_0.727;243_S_0.791;311_I_0.710;319_T_0.694;364_R_0.726;382_E_0.816;389_S_0.718;404_M_0.707;447_S_0.585;462_P_0.817;485_N_0.953*;499_L_0.739;506_Y_0.742;536_M_0.509;	Protein dpy-19	Camponotus floridanus	GO:0000030|mannosyltransferase activity|IEA; GO:0016020|membrane|IEA; GO:0016021|integral to membrane|IEA; GO:0097502||IEA
FEX_0002039-mRNA1	F3x4	PositiveSelection	-3750.387609	0.10144	1.00000	0.10144	1.00000	0.10144	1.00000	8.94741	8.94741	20_W_0.531;79_L_0.542;90_Q_0.955*;93_C_0.575;114_G_0.957*;139_R_0.786;155_S_0.549;165_V_0.948;202_E_0.506;214_E_0.558;263_L_0.866;297_G_0.565;	Sodium/nucleoside cotransporter	Camponotus floridanus	GO:0005337|nucleoside transmembrane transporter activity|IEA; GO:0006810|transport|IEA; GO:0016020|membrane|IEA; GO:0016021|integral to membrane|IEA; GO:1901642||IEA
FEX_0002012-mRNA1	F3x4	PositiveSelection	-2509.001344	0.03550	1.00000	0.03550	1.00000	0.03550	1.00000	49.32417	49.32417	1_E_0.978*;2_P_0.693;4_I_0.518;5_Q_0.992**;6_G_0.638;12_T_0.801;167_D_0.529;168_P_0.669;221_N_0.763;261_T_0.715;268_T_0.738;	5'-nucleotidase	Camponotus floridanus	GO:0000166|nucleotide binding|IEA; GO:0009166|nucleotide catabolic process|IEA; GO:0016787|hydrolase activity|IEA; GO:0016788|hydrolase activity, acting on ester bonds|IEA; GO:0046872|metal ion binding|IEA
FEX_0002010-mRNA2	F3x4	PositiveSelection	-3521.943014	0.06571	1.00000	0.06571	1.00000	0.06571	1.00000	2.19827	2.19827	7_M_0.729;11_R_0.717;47_I_0.641;51_A_0.690;54_M_0.646;152_M_0.567;155_G_0.979*;161_D_0.730;212_P_0.969*;215_T_0.663;269_M_0.900;282_A_0.734;334_A_0.972*;343_G_0.646;346_E_0.659;352_K_0.660;355_D_0.633;	SET and MYND domain-containing protein 4	Camponotus floridanus	NA
FEX_0012122-mRNA1	F3x4	PositiveSelection	-8509.880124	0.08196	1.00000	0.08196	1.00000	0.08196	1.00000	564.97770	564.97770	168_G_0.617;223_E_0.730;225_C_0.616;226_K_0.911;227_Q_0.612;229_L_0.751;231_N_0.780;232_C_0.941;233_K_0.687;235_T_0.895;237_D_0.900;238_L_0.927;239_E_0.956*;682_D_0.592;	Leucine-rich repeat-containing protein 50	Lasius niger	GO:0044458|motile cilium assembly|IEA
FEX_0003294-mRNA1	F3x4	PositiveSelection	-1967.673630	0.07267	1.00000	0.07267	1.00000	0.07267	1.00000	32.75425	32.75425	20_R_0.695;115_E_0.616;162_S_0.751;177_V_0.551;196_V_0.635;197_R_0.683;214_I_0.689;216_L_0.981*;217_L_0.969*;218_F_0.665;219_L_0.951*;	Choline transporter-like protein 1	Camponotus floridanus	GO:0016020|membrane|IEA; GO:0016021|integral to membrane|IEA
FEX_0012844-mRNA1	F3x4	PositiveSelection	-1227.327263	0.00696	1.00000	0.00696	1.00000	0.00696	1.00000	4.16313	4.16313	1_V_0.873;2_V_0.900;9_A_0.861;10_R_0.902;13_K_0.829;15_R_0.927;17_R_0.931;21_A_0.952*;23_V_0.933;24_K_0.816;33_G_0.950*;41_R_0.927;51_A_0.929;61_P_0.981*;63_G_0.863;64_M_0.999**;65_G_0.997**;72_T_0.930;73_S_0.895;75_I_0.860;76_S_1.000**;77_N_1.000**;78_W_0.999**;79_K_1.000**;80_N_0.831;82_K_0.864;83_G_0.849;101_Q_0.918;102_V_0.998**;103_H_0.940;104_I_0.947;107_N_0.895;108_F_0.926;114_A_0.999**;11…	Bx42 protein	Camponotus floridanus	GO:0000398|nuclear mRNA splicing, via spliceosome|IEA; GO:0005681|spliceosomal complex|IEA
FEX_0012469-mRNA1	F3x4	PositiveSelection	-8433.358468	0.08309	1.00000	0.08309	1.00000	0.08309	1.00000	89.56089	89.56089	1_S_0.542;2_D_0.560;3_N_0.941;4_D_0.925;5_S_0.694;6_P_0.672;8_A_0.680;29_G_0.987*;31_V_0.535;32_T_0.516;212_N_0.515;292_D_0.647;313_I_0.707;413_I_0.896;	Transforming acidic coiled-coil-containing protein 1	Lasius niger	NA
FEX_0007741-mRNA6	F3x4	PositiveSelection	-1885.528864	0.05769	1.00000	0.05769	1.00000	0.05769	1.00000	228.12666	228.12666	9_L_0.914;11_D_0.521;24_L_0.939;60_S_0.546;69_V_0.681;120_G_0.601;165_Y_0.998**;166_R_0.999**;167_A_1.000**;168_A_0.924;169_R_1.000**;170_E_1.000**;171_Q_0.999**;172_F_0.935;173_L_0.997**;174_V_0.999**;175_S_0.927;176_S_0.948;177_D_1.000**;179_A_1.000**;181_R_0.842;182_A_0.997**;183_Q_0.912;184_L_0.996**;185_T_0.998**;186_E_0.953*;187_F_0.925;188_I_0.988*;189_K_0.997**;190_L_0.988*;191_L_0.990**;…	Origin recognition complex subunit	Camponotus floridanus	GO:0000808|origin recognition complex|IEA; GO:0005634|nucleus|IEA; GO:0006260|DNA replication|IEA
FEX_0011098-mRNA1	F3x4	PositiveSelection	-4135.939326	0.02227	1.00000	0.02227	1.00000	0.02227	1.00000	8.58206	8.58206	8_V_0.586;221_I_0.664;294_V_0.975*;507_F_0.642;511_S_0.550;	U4/U6 small nuclear ribonucleoprotein Prp4	Lasius niger	GO:0008380|RNA splicing|IEA; GO:0019013|viral nucleocapsid|IEA; GO:0030529|ribonucleoprotein complex|IEA
FEX_0005169-mRNA1	F3x4	PositiveSelection	-1373.440400	0.07054	1.00000	0.07054	1.00000	0.07054	1.00000	5.67990	5.67990	12_D_0.822;25_D_0.590;38_A_0.614;39_R_0.960*;40_R_0.739;53_L_0.619;65_E_0.893;68_N_0.735;71_E_0.734;93_K_0.916;95_D_0.883;107_D_0.681;108_D_0.896;117_L_0.739;118_C_0.510;	Chromobox protein-like protein 5	Camponotus floridanus	GO:0005634|nucleus|IEA
FEX_0002440-mRNA2	F3x4	PositiveSelection	-5807.964415	0.03456	1.00000	0.03456	1.00000	0.03456	1.00000	999.00000	999.00000	216_S_0.544;400_S_0.541;500_C_0.557;512_L_0.505;518_H_0.963*;610_A_0.520;675_R_0.504;	Potassium voltage-gated channel subfamily H member	Camponotus floridanus	GO:0000155|two-component sensor activity|IEA; GO:0000160|two-component signal transduction system (phosphorelay)|IEA; GO:0005216|ion channel activity|IEA; GO:0005249|voltage-gated potassium channel activity|IEA; GO:0005622|intracellular|IEA; GO:0006810|transport|IEA; GO:0006811|ion transport|IEA; GO:0006813|potassium ion transport|IEA; GO:0016020|membrane|IEA; GO:0016021|integral to membrane|IEA;…
FEX_0005043-mRNA1	F3x4	PositiveSelection	-4811.745442	0.02479	1.00000	0.02479	1.00000	0.02479	1.00000	999.00000	999.00000	356_A_0.657;479_V_0.634;519_S_0.771;610_G_0.993**;611_A_0.700;613_S_0.996**;614_Q_0.999**;615_A_0.707;616_K_0.993**;617_G_0.999**;618_A_0.999**;619_F_0.959*;620_S_1.000**;	Late secretory pathway protein AVL9 like protein	Lasius niger	NA
FEX_0005048-mRNA1	F3x4	PositiveSelection	-7342.783978	0.06925	1.00000	0.06925	1.00000	0.06925	1.00000	120.61243	120.61243	2_R_0.992**;3_L_0.997**;5_E_0.998**;6_K_0.975*;8_D_0.590;10_S_0.970*;11_I_0.668;13_K_0.657;14_D_0.979*;15_V_0.920;16_D_0.945;17_L_0.958*;20_H_0.820;21_E_0.987*;51_T_0.621;82_R_0.692;94_R_0.647;95_R_0.647;154_E_0.812;187_E_0.702;223_S_0.507;236_D_0.802;366_V_0.624;378_V_0.635;384_R_0.647;450_S_0.973*;493_L_0.703;605_D_0.693;736_K_0.613;761_D_0.839;762_E_0.992**;763_T_0.752;764_E_0.976*;	Mical-like protein 2 protein	Lasius niger	GO:0008270|zinc ion binding|IEA; GO:0046872|metal ion binding|IEA
FEX_0003466-mRNA1	F3x4	PositiveSelection	-4034.989953	0.04482	1.00000	0.04482	1.00000	0.04482	1.00000	22.34353	22.34353	3_N_0.553;166_A_0.547;176_N_0.747;177_S_0.846;183_F_0.709;193_P_0.567;205_K_0.580;219_A_0.743;222_Y_0.720;224_R_0.620;238_A_0.969*;241_A_0.795;	Thyrotroph embryonic factor isoformx1	Lasius niger	GO:0003700|sequence-specific DNA binding transcription factor activity|IEA; GO:0006355|regulation of transcription, DNA-dependent|IEA; GO:0043565|sequence-specific DNA binding|IEA
FEX_0008344-mRNA1	F3x4	PositiveSelection	-3489.284153	0.00334	1.00000	0.00334	1.00000	0.00334	1.00000	998.99941	998.99941	33_P_0.504;434_E_0.894;436_I_0.966*;437_G_0.524;438_D_0.981*;	Guanylate cyclase	Camponotus floridanus	GO:0000166|nucleotide binding|IEA; GO:0004383|guanylate cyclase activity|IEA; GO:0004672|protein kinase activity|IEA; GO:0005524|ATP binding|IEA; GO:0005622|intracellular|IEA; GO:0006182|cGMP biosynthetic process|IEA; GO:0006468|protein phosphorylation|IEA; GO:0009190|cyclic nucleotide biosynthetic process|IEA; GO:0016020|membrane|IEA; GO:0016021|integral to membrane|IEA; GO:0016829|lyase activit…
FEX_0008290-mRNA1	F3x4	PositiveSelection	-3189.703941	0.01914	1.00000	0.01914	1.00000	0.01914	1.00000	12.19853	12.19853	54_G_0.523;63_V_0.976*;73_S_0.652;74_N_0.602;111_T_0.605;	Histone acetyltransferase	Lasius niger	GO:0004402|histone acetyltransferase activity|IEA; GO:0005634|nucleus|IEA; GO:0006355|regulation of transcription, DNA-dependent|IEA; GO:0008152|metabolic process|IEA; GO:0016573|histone acetylation|IEA; GO:0016740|transferase activity|IEA; GO:0016747|transferase activity, transferring acyl groups other than amino-acyl groups|IEA
FEX_0008291-mRNA2	F3x4	PositiveSelection	-4231.657640	0.02646	1.00000	0.02646	1.00000	0.02646	1.00000	419.74500	419.74500	137_T_0.966*;170_N_0.529;228_E_0.521;549_K_0.502;	pfam02145, Rap_GAP, Rap/ran-GAP	Camponotus floridanus	NA
FEX_0003036-mRNA1	F3x4	PositiveSelection	-6691.825223	0.02795	1.00000	0.02795	1.00000	0.02795	1.00000	24.16360	24.16360	152_S_0.558;159_T_0.756;163_P_0.737;189_T_0.632;626_V_0.907;628_G_0.634;706_D_0.629;710_A_0.705;780_D_0.692;859_N_0.698;903_R_0.631;934_S_0.985*;935_S_0.993**;	C-myc promoter-binding protein	Camponotus floridanus	NA
FEX_0009470-mRNA1	F3x4	PositiveSelection	-1542.615557	0.03354	1.00000	0.03354	1.00000	0.03354	1.00000	14.51109	14.51109	80_I_0.592;95_D_0.992**;173_T_0.933;	PREDICTED: intraflagellar transport protein 46 homolog	Camponotus floridanus	NA
FEX_0001477-mRNA1	F3x4	PositiveSelection	-1971.887871	0.05252	1.00000	0.05252	1.00000	0.05252	1.00000	32.74526	32.74526	45_C_0.993**;111_F_0.638;179_L_0.670;	Elongation of very long chain fatty acids protein	Linepithema humile	GO:0006629|lipid metabolic process|IEA; GO:0006631|fatty acid metabolic process|IEA; GO:0006633|fatty acid biosynthetic process|IEA; GO:0016020|membrane|IEA; GO:0016021|integral to membrane|IEA; GO:0016740|transferase activity|IEA
FEX_0010770-mRNA1	F3x4	PositiveSelection	-4063.433179	0.05729	1.00000	0.05729	1.00000	0.05729	1.00000	999.00000	999.00000	32_H_0.559;38_H_0.585;40_E_0.572;41_Q_0.838;349_L_0.538;416_Y_0.911;417_S_0.910;418_C_0.954*;419_D_0.824;420_R_0.999**;421_C_0.805;422_S_0.997**;423_K_0.992**;424_T_0.854;425_F_0.865;426_S_0.805;428_M_0.996**;429_S_0.998**;430_L_0.977*;431_L_0.830;432_T_0.763;433_K_1.000**;434_H_0.983*;435_Q_0.932;436_D_0.582;437_G_0.998**;438_G_0.997**;439_C_0.997**;440_P_0.822;441_S_0.627;442_V_0.999**;443_V_0.…	Protein escargot (Fragment)	Lasius niger	GO:0003676|nucleic acid binding|IEA; GO:0046872|metal ion binding|IEA
FEX_0013598-mRNA5	F3x4	PositiveSelection	-13038.597489	0.08120	1.00000	0.08120	1.00000	0.08120	1.00000	998.99966	998.99966	1_D_0.994**;2_S_0.990*;3_I_0.970*;4_R_0.952*;6_Q_0.990*;102_A_0.637;141_K_0.506;261_H_0.500;302_D_0.682;655_Q_0.575;695_E_0.568;698_Q_0.646;768_S_0.550;809_C_0.570;958_G_0.708;1064_T_0.530;1126_E_0.513;1294_N_0.613;1312_K_0.949;1335_K_0.597;1419_K_0.642;	Centrosomal protein	Lasius niger	GO:0003723|RNA binding|IEA; GO:0005634|nucleus|IEA; GO:0005813|centrosome|IEA; GO:0060271|cilium morphogenesis|IEA
FEX_0001159-mRNA1	F3x4	PositiveSelection	-2727.259160	0.04071	1.00000	0.04071	1.00000	0.04071	1.00000	25.27355	25.27355	9_Q_0.764;62_A_0.719;116_P_0.684;126_T_0.923;191_C_0.752;193_S_0.576;270_P_0.688;325_V_0.587;341_R_0.573;342_G_0.999**;	Villin-like protein quail-like protein	Lasius niger	GO:0003779|actin binding|IEA; GO:0007010|cytoskeleton organization|IEA
FEX_0006779-mRNA1	F3x4	PositiveSelection	-1791.511013	0.11845	1.00000	0.11845	1.00000	0.11845	1.00000	998.99080	998.99080	66_A_0.983*;112_S_0.702;	Antichymotrypsin-2	Vollenhovia emeryi	GO:0005615|extracellular space|IEA
FEX_0000940-mRNA1	F3x4	PositiveSelection	-5109.529725	0.01631	1.00000	0.01631	1.00000	0.01631	1.00000	130.91708	130.91708	287_E_0.634;289_N_0.544;428_N_0.762;468_S_0.621;587_V_0.557;709_T_0.995**;710_V_0.998**;711_F_0.994**;712_D_1.000**;713_P_0.996**;714_M_0.953*;715_Y_0.678;717_S_0.994**;719_Y_0.994**;720_N_0.997**;	Phospholipid-transporting ATPase	Camponotus floridanus	GO:0000166|nucleotide binding|IEA; GO:0000287|magnesium ion binding|IEA; GO:0004012|phospholipid-translocating ATPase activity|IEA; GO:0005524|ATP binding|IEA; GO:0008152|metabolic process|IEA; GO:0015914|phospholipid transport|IEA; GO:0016020|membrane|IEA; GO:0016021|integral to membrane|IEA; GO:0016787|hydrolase activity|IEA; GO:0045332|phospholipid translocation|IEA; GO:0046872|metal ion bindi…
FEX_0007168-mRNA1	F3x4	PositiveSelection	-941.495445	0.03305	1.00000	0.03305	1.00000	0.03305	1.00000	310.19162	310.19162	44_S_0.878;104_V_1.000**;105_W_0.884;106_N_0.904;107_I_1.000**;108_R_0.999**;	Protein TSSC1	Pogonomyrmex barbatus	NA
FEX_0008693-mRNA1	F3x4	PositiveSelection	-2885.509242	0.12596	1.00000	0.12596	1.00000	0.12596	1.00000	999.00000	999.00000	1_Y_0.998**;3_E_0.999**;4_A_0.540;5_I_0.999**;6_A_0.972*;8_A_0.984*;9_R_0.999**;56_T_0.749;127_D_0.604;211_R_0.579;219_A_0.617;	Integral membrane protein DGCR2/IDD	Lasius niger	GO:0016020|membrane|IEA; GO:0016021|integral to membrane|IEA
FEX_0013031-mRNA1	F3x4	PositiveSelection	-2116.223677	0.01970	1.00000	0.01970	1.00000	0.01970	1.00000	998.99981	998.99981	268_M_0.980*;	T-complex protein 1 subunit beta	Lasius niger	GO:0000166|nucleotide binding|IEA; GO:0005524|ATP binding|IEA; GO:0005737|cytoplasm|IEA; GO:0006457|protein folding|IEA; GO:0051082|unfolded protein binding|IEA
FEX_0000516-mRNA1	F3x4	PositiveSelection	-315.831061	0.08048	1.00000	0.08048	1.00000	0.08048	1.00000	37.36024	37.36024	1_M_0.975*;2_C_0.969*;3_G_0.997**;4_K_0.956*;5_L_0.659;7_I_0.996**;8_T_0.999**;9_M_0.565;10_L_0.795;11_R_0.762;12_H_0.977*;13_S_0.923;14_L_0.994**;16_G_0.993**;19_S_0.966*;20_M_0.988*;21_T_0.888;23_R_0.994**;24_V_0.967*;25_G_0.962*;27_I_0.974*;	Solute carrier family 22 member 21	Camponotus floridanus	GO:0005215|transporter activity|IEA; GO:0016020|membrane|IEA; GO:0016021|integral to membrane|IEA; GO:0022857|transmembrane transporter activity|IEA; GO:0055085|transmembrane transport|IEA
FEX_0000652-mRNA1	F3x4	PositiveSelection	-1275.060524	0.05701	1.00000	0.05701	1.00000	0.05701	1.00000	92.36293	92.36293	77_N_0.795;124_F_0.958*;125_S_0.998**;126_Y_0.959*;127_D_0.999**;128_R_0.864;129_K_0.997**;131_L_0.988*;132_R_1.000**;133_L_0.999**;134_K_0.999**;135_W_0.998**;136_D_0.979*;137_A_0.999**;138_G_0.983*;139_G_0.998**;140_V_1.000**;141_T_1.000**;142_V_0.955*;143_N_0.964*;144_P_0.909;145_E_0.971*;146_L_0.989*;147_K_0.976*;149_L_0.991**;	Glycine receptor subunit alpha-2	Trichogramma pretiosum	GO:0005230|extracellular ligand-gated ion channel activity|IEA; GO:0005886|plasma membrane|IEA; GO:0006810|transport|IEA; GO:0006811|ion transport|IEA; GO:0016020|membrane|IEA; GO:0016021|integral to membrane|IEA; GO:0030054|cell junction|IEA; GO:0034220|ion transmembrane transport|IEA; GO:0045202|synapse|IEA
FEX_0003485-mRNA1	F3x4	PositiveSelection	-1987.302088	0.01615	1.00000	0.01615	1.00000	0.01615	1.00000	605.35664	605.35664	13_K_0.842;243_K_0.517;245_V_0.856;246_I_0.941;247_R_0.993**;249_E_0.975*;	Calcium-binding mitochondrial carrier protein Aralar1-like protein	Vollenhovia emeryi	GO:0005509|calcium ion binding|IEA; GO:0006810|transport|IEA; GO:0016020|membrane|IEA; GO:0016021|integral to membrane|IEA; GO:0055085|transmembrane transport|IEA
FEX_0005765-mRNA1	F3x4	PositiveSelection	-1460.063817	0.02280	1.00000	0.02280	1.00000	0.02280	1.00000	19.39443	19.39443	107_A_0.987*;	pfam07707, BACK, BTB And C-terminal Kelch	Solenopsis invicta	NA
FEX_0010063-mRNA1	F3x4	PositiveSelection	-8629.432975	0.09436	1.00000	0.09436	1.00000	0.09436	1.00000	112.17428	112.17428	9_V_0.699;10_K_0.987*;712_N_0.733;776_R_0.711;	S1 rna-binding domain-containing protein 1-like protein	Lasius niger	GO:0003676|nucleic acid binding|IEA; GO:0006139|nucleobase-containing compound metabolic process|IEA
FEX_0010067-mRNA1	F3x4	PositiveSelection	-3570.324616	0.03319	1.00000	0.03319	1.00000	0.03319	1.00000	999.00000	999.00000	70_A_0.653;87_T_0.644;245_T_0.506;354_T_0.592;451_A_0.538;452_F_0.995**;453_I_0.941;455_A_0.994**;456_F_0.677;457_T_0.602;458_S_0.997**;459_N_0.613;	Anoctamin	Pogonomyrmex barbatus	GO:0016020|membrane|IEA; GO:0016021|integral to membrane|IEA; GO:0046983|protein dimerization activity|IEA
FEX_0010068-mRNA1	F3x4	PositiveSelection	-2581.548465	0.15103	1.00000	0.15103	1.00000	0.15103	1.00000	102.53000	102.53000	1_T_0.968*;2_S_0.772;3_R_0.784;4_L_0.806;6_C_0.998**;7_K_0.961*;8_P_0.987*;9_E_0.966*;11_T_0.775;12_R_0.707;13_M_0.958*;15_V_0.853;17_R_0.963*;18_P_0.858;23_K_0.973*;24_H_0.995**;25_K_0.998**;27_Q_0.879;28_L_0.987*;29_R_0.992**;30_V_0.850;31_S_0.996**;32_Q_0.999**;33_T_0.926;34_I_0.939;36_N_0.990**;38_K_0.972*;39_K_0.759;40_S_0.882;41_D_0.900;42_D_0.999**;43_E_0.963*;44_T_0.676;47_Q_0.996**;48_N_…	Sorting and assembly machinery component 50-like protein	Pogonomyrmex barbatus	GO:0019867|outer membrane|IEA
FEX_0012340-mRNA1	F3x4	PositiveSelection	-1894.875390	0.03106	1.00000	0.03106	1.00000	0.03106	1.00000	41.10638	41.10638	120_G_0.501;175_G_0.975*;189_G_0.500;	RNA-binding protein cabeza	Lasius niger	GO:0000166|nucleotide binding|IEA; GO:0003676|nucleic acid binding|IEA; GO:0008270|zinc ion binding|IEA
FEX_0010082-mRNA1	F3x4	PositiveSelection	-5299.261594	0.04152	1.00000	0.04152	1.00000	0.04152	1.00000	120.12888	120.12888	48_I_0.567;117_V_0.544;161_V_0.535;184_P_0.622;227_L_0.703;235_V_0.530;373_R_0.561;376_P_0.674;413_D_0.560;417_E_0.999**;481_A_0.563;537_A_0.658;538_G_0.577;583_F_0.931;584_Y_0.981*;586_V_0.754;587_V_0.999**;588_K_0.881;589_N_0.992**;590_V_0.604;591_K_0.914;592_H_0.609;593_Q_0.988*;595_Q_0.998**;596_E_0.985*;597_S_0.995**;598_G_0.995**;599_E_0.974*;600_F_0.729;601_Q_0.996**;602_E_0.999**;604_N_0.…	Protein wings apart-like	Camponotus floridanus	NA
FEX_0009419-mRNA1	F3x4	PositiveSelection	-6729.424075	0.05114	1.00000	0.05114	1.00000	0.05114	1.00000	20.94646	20.94646	3_T_0.533;193_P_0.533;235_F_0.551;318_E_0.502;399_A_0.578;478_H_0.957*;626_I_0.583;694_E_0.573;713_V_0.523;770_W_0.864;	Serine proteinase stubble	Dinoponera quadriceps	GO:0004252|serine-type endopeptidase activity|IEA; GO:0006508|proteolysis|IEA
FEX_0010084-mRNA2	F3x4	PositiveSelection	-836.599287	0.06951	1.00000	0.06951	1.00000	0.06951	1.00000	161.75260	161.75260	40_S_0.831;49_P_0.993**;50_R_0.987*;55_V_0.764;88_S_0.987*;89_S_0.995**;90_N_1.000**;91_R_0.956*;92_S_0.800;	DUF4477 domain containing protein	Camponotus floridanus	NA
FEX_0010087-mRNA1	F3x4	PositiveSelection	-6094.177270	0.11973	1.00000	0.11973	1.00000	0.11973	1.00000	999.00000	999.00000	299_Q_0.574;363_E_0.983*;371_N_0.519;434_Y_0.520;512_Y_0.737;513_K_0.509;514_D_0.967*;515_I_0.729;517_P_0.947;519_R_0.961*;520_N_0.997**;521_M_0.868;523_W_0.937;524_Q_0.994**;525_L_0.821;	N-acetyltransferase esco2	Lasius niger	GO:0008152|metabolic process|IEA; GO:0016740|transferase activity|IEA
FEX_0009418-mRNA1	F3x4	PositiveSelection	-641.497645	0.08570	1.00000	0.08570	1.00000	0.08570	1.00000	892.72379	892.72379	55_W_0.998**;57_H_0.992**;58_S_1.000**;59_K_0.998**;60_I_0.998**;61_G_0.950;62_Q_0.997**;63_V_0.895;64_T_0.998**;65_M_0.886;66_H_1.000**;67_Y_1.000**;68_V_0.998**;69_E_0.999**;70_S_1.000**;72_W_0.998**;73_I_0.980*;	Unassigned protein	Lasius niger	NA
FEX_0009422-mRNA1	F3x4	PositiveSelection	-1259.356555	0.09597	1.00000	0.09597	1.00000	0.09597	1.00000	999.00000	999.00000	24_G_0.941;26_L_0.826;34_Y_0.990**;35_G_0.748;75_V_0.862;92_A_0.601;106_Q_0.572;108_N_0.747;111_L_0.788;	KRTAP multi-domain protein	Camponotus floridanus	NA
FEX_0005557-mRNA1	F3x4	PositiveSelection	-896.323610	0.01263	1.00000	0.01263	1.00000	0.01263	1.00000	11.61827	11.61827	13_T_0.989*;101_T_0.617;	Chromobox protein-like protein	Camponotus floridanus	GO:0005634|nucleus|IEA
FEX_0012376-mRNA1	F3x4	PositiveSelection	-2277.157505	0.02503	1.00000	0.02503	1.00000	0.02503	1.00000	188.14758	188.14758	2_K_0.801;3_E_0.999**;4_P_0.821;8_S_0.997**;9_P_0.590;10_V_0.538;11_R_0.967*;162_P_0.583;172_L_0.584;	Uridine phosphorylase 1	Cerapachys biroi	GO:0003824|catalytic activity|IEA; GO:0004850|uridine phosphorylase activity|IEA; GO:0005737|cytoplasm|IEA; GO:0009116|nucleoside metabolic process|IEA; GO:0009166|nucleotide catabolic process|IEA
FEX_0006903-mRNA1	F3x4	PositiveSelection	-2768.896581	0.05707	1.00000	0.05707	1.00000	0.05707	1.00000	891.66511	891.66511	11_V_0.814;24_E_0.919;44_S_0.509;47_V_0.571;50_S_0.892;97_E_0.655;100_A_0.798;101_L_0.824;111_L_0.846;118_S_0.815;120_S_0.540;126_S_0.616;132_D_0.991**;137_E_0.719;155_D_0.741;166_K_0.807;202_K_0.713;223_K_0.713;224_R_0.666;225_I_0.811;226_V_0.971*;227_V_0.998**;228_Q_0.989*;229_N_0.996**;230_D_0.999**;231_S_0.864;232_S_1.000**;233_D_0.999**;234_S_0.999**;235_E_1.000**;236_E_0.756;237_Q_0.991**;2…	Dna polymerase delta subunit 3-like protein	Lasius niger	GO:0005634|nucleus|IEA; GO:0006260|DNA replication|IEA
FEX_0010055-mRNA1	F3x4	PositiveSelection	-3576.728420	0.06832	1.00000	0.06832	1.00000	0.06832	1.00000	71.21307	71.21307	144_T_0.550;156_Y_0.592;162_Q_0.579;177_A_0.577;228_D_0.530;325_M_0.980*;	Focal adhesion kinase 1	Camponotus floridanus	GO:0000166|nucleotide binding|IEA; GO:0004672|protein kinase activity|IEA; GO:0004713|protein tyrosine kinase activity|IEA; GO:0004871|signal transducer activity|IEA; GO:0005524|ATP binding|IEA; GO:0005856|cytoskeleton|IEA; GO:0005925|focal adhesion|IEA; GO:0006468|protein phosphorylation|IEA; GO:0007165|signal transduction|IEA; GO:0007172|signal complex assembly|IEA; GO:0016301|kinase activity|I…
FEX_0009453-mRNA2	F3x4	PositiveSelection	-1463.716586	0.08054	1.00000	0.08054	1.00000	0.08054	1.00000	404.53421	404.53421	37_K_0.546;78_N_0.516;91_K_0.846;96_A_0.871;104_V_0.786;171_G_0.873;172_R_0.993**;173_L_0.910;174_G_0.805;176_K_0.995**;177_V_0.998**;178_S_0.823;179_Y_0.990**;	Mediator of rna polymerase ii transcription subunit 14 (Fragment)	Lasius niger	NA
FEX_0013280-mRNA3	F3x4	PositiveSelection	-1355.410309	0.02725	1.00000	0.02725	1.00000	0.02725	1.00000	46.51593	46.51593	83_D_0.530;133_S_0.986*;182_T_0.656;	Tyrosine-protein kinase	Camponotus floridanus	GO:0000166|nucleotide binding|IEA; GO:0004672|protein kinase activity|IEA; GO:0004713|protein tyrosine kinase activity|IEA; GO:0004715|non-membrane spanning protein tyrosine kinase activity|IEA; GO:0005524|ATP binding|IEA; GO:0006468|protein phosphorylation|IEA; GO:0016301|kinase activity|IEA; GO:0016310|phosphorylation|IEA; GO:0016740|transferase activity|IEA; GO:0018108|peptidyl-tyrosine phosph…
FEX_0007061-mRNA1	F3x4	PositiveSelection	-7957.283476	0.04899	1.00000	0.04899	1.00000	0.04899	1.00000	76.68443	76.68443	28_V_0.655;67_E_0.581;92_A_0.661;224_D_0.547;324_V_0.601;331_A_0.952*;383_P_0.603;415_V_0.604;603_R_0.551;754_V_0.557;766_I_0.568;879_I_0.568;961_V_0.558;989_V_0.609;1017_L_0.910;1018_F_0.941;	Cadherin-23	Camponotus floridanus	GO:0005509|calcium ion binding|IEA; GO:0005886|plasma membrane|IEA; GO:0007155|cell adhesion|IEA; GO:0007156|homophilic cell adhesion|IEA; GO:0016020|membrane|IEA; GO:0016021|integral to membrane|IEA
FEX_0006390-mRNA1	F3x4	PositiveSelection	-3650.084509	0.02701	1.00000	0.02701	1.00000	0.02701	1.00000	926.53376	926.53376	40_H_0.910;311_T_0.999**;312_L_0.995**;313_T_0.965*;314_T_0.999**;315_Q_0.922;316_S_0.797;317_S_0.635;318_A_0.927;319_T_0.996**;320_L_0.960*;321_T_0.809;322_H_0.997**;324_S_0.848;326_A_0.798;327_A_0.594;328_P_0.879;329_V_0.714;330_A_0.991**;331_V_0.998**;332_S_0.988*;337_P_0.914;338_P_0.996**;339_L_0.998**;341_D_0.998**;342_I_0.860;346_V_0.766;348_Q_0.917;349_V_0.898;350_A_0.917;354_Q_0.999**;355…	RNA-binding protein 35A	Monomorium pharaonis	GO:0000166|nucleotide binding|IEA; GO:0003676|nucleic acid binding|IEA
FEX_0001707-mRNA1	F3x4	PositiveSelection	-1349.062629	0.02717	1.00000	0.02717	1.00000	0.02717	1.00000	29.41180	29.41180	14_A_0.817;58_Q_0.700;118_T_0.703;124_I_0.827;131_P_0.796;146_G_0.974*;148_L_0.982*;149_L_0.908;150_I_0.992**;	60S ribosomal protein L6	Camponotus floridanus	GO:0003735|structural constituent of ribosome|IEA; GO:0005622|intracellular|IEA; GO:0005840|ribosome|IEA; GO:0006412|translation|IEA; GO:0030529|ribonucleoprotein complex|IEA
FEX_0011475-mRNA1	F3x4	PositiveSelection	-3034.890563	0.04995	1.00000	0.04995	1.00000	0.04995	1.00000	37.48312	37.48312	177_V_0.526;252_T_0.627;256_A_0.520;326_T_0.621;330_E_0.991**;	Dynactin subunit 4	Wasmannia auropunctata	GO:0005869|dynactin complex|IEA
FEX_0005360-mRNA1	F3x4	PositiveSelection	-2652.686826	0.07298	1.00000	0.07298	1.00000	0.07298	1.00000	999.00000	999.00000	2_S_0.985*;3_M_0.998**;4_V_0.893;5_E_0.999**;7_L_0.935;9_L_0.882;10_G_0.858;11_P_0.990**;12_E_0.996**;13_I_0.619;14_R_0.994**;15_E_0.782;16_L_0.997**;17_K_0.785;18_L_0.999**;20_P_0.997**;21_S_0.988*;22_F_0.654;23_T_0.998**;24_S_0.997**;26_S_0.919;27_T_0.900;28_K_0.997**;29_F_0.999**;30_H_0.995**;31_T_0.996**;32_L_0.824;33_K_0.999**;34_Y_0.876;124_P_0.802;220_N_0.693;250_S_0.551;	Chondroitin sulfate synthase 2	Polistes canadensis	GO:0008152|metabolic process|IEA; GO:0008376|acetylgalactosaminyltransferase activity|IEA; GO:0016020|membrane|IEA; GO:0016021|integral to membrane|IEA; GO:0032580|Golgi cisterna membrane|IEA
FEX_0004168-mRNA4	F3x4	PositiveSelection	-4085.978265	0.08047	1.00000	0.08047	1.00000	0.08047	1.00000	999.00000	999.00000	1_A_0.957*;2_A_0.772;3_L_0.990*;4_N_0.992**;5_L_0.983*;6_A_0.637;7_V_0.699;8_L_0.626;9_H_0.733;11_Q_0.996**;13_N_0.999**;14_H_0.983*;15_K_0.524;27_K_0.719;42_H_0.714;46_S_0.732;52_E_0.608;86_A_0.577;88_E_0.753;97_D_0.617;139_A_0.771;179_L_0.745;237_K_0.612;451_L_0.664;	Anaphase-promoting complex subunit 5	Lasius niger	NA
FEX_0002219-mRNA1	F3x4	PositiveSelection	-1061.436842	0.04965	1.00000	0.04965	1.00000	0.04965	1.00000	998.91361	998.91361	33_G_0.821;64_M_0.722;87_M_0.999**;88_P_0.880;89_L_0.939;90_P_0.997**;91_I_0.998**;92_M_0.958*;94_D_0.987*;95_E_0.990*;96_K_0.998**;97_G_0.982*;	Unassigned protein	Camponotus floridanus	NA
FEX_0001427-mRNA1	F3x4	PositiveSelection	-7412.163779	0.02881	1.00000	0.02881	1.00000	0.02881	1.00000	999.00000	999.00000	2_R_0.999**;3_C_0.999**;4_P_0.996**;5_I_0.999**;6_F_0.956*;7_C_0.965*;8_M_0.999**;9_A_0.565;10_W_0.754;11_T_0.620;12_P_0.979*;13_E_0.629;	WD repeat-containing protein 33	Camponotus floridanus	GO:0016020|membrane|IEA; GO:0016021|integral to membrane|IEA
FEX_0001401-mRNA2	F3x4	PositiveSelection	-3756.870755	0.02265	1.00000	0.02265	1.00000	0.02265	1.00000	7.01846	7.01846	219_G_0.951*;	Glyco_transf_92 domain containing protein	Camponotus floridanus	NA
FEX_0004121-mRNA1	F3x4	PositiveSelection	-2377.324115	0.07970	1.00000	0.07970	1.00000	0.07970	1.00000	68.77497	68.77497	16_L_0.682;23_K_0.977*;40_S_0.665;138_G_0.896;	Putative serine/threonine-protein kinase haspin-like protein	Acromyrmex echinatior	GO:0004672|protein kinase activity|IEA; GO:0005524|ATP binding|IEA; GO:0006468|protein phosphorylation|IEA; GO:0016301|kinase activity|IEA; GO:0016310|phosphorylation|IEA
FEX_0008384-mRNA3	F3x4	PositiveSelection	-4082.313174	0.05985	1.00000	0.05985	1.00000	0.05985	1.00000	111.70322	111.70322	11_P_0.606;216_V_0.674;252_S_0.562;488_V_0.975*;489_Y_0.963*;490_S_0.991**;	TBC1 domain family member 14	Camponotus floridanus	NA
FEX_0001407-mRNA1	F3x4	PositiveSelection	-353.001902	0.53351	1.00000	0.53351	1.00000	0.53351	1.00000	999.00000	999.00000	1_L_0.900;2_F_0.956*;3_C_0.981*;4_Q_0.890;5_N_0.755;6_C_0.503;9_P_0.534;10_I_0.650;14_D_0.681;17_I_0.513;19_C_0.500;22_C_0.580;23_Y_0.580;	Copper-transporting atpase 1	Lasius niger	GO:0000166|nucleotide binding|IEA; GO:0005507|copper ion binding|IEA; GO:0006812|cation transport|IEA; GO:0008152|metabolic process|IEA; GO:0016020|membrane|IEA; GO:0016021|integral to membrane|IEA; GO:0016787|hydrolase activity|IEA; GO:0019829|cation-transporting ATPase activity|IEA; GO:0030001|metal ion transport|IEA; GO:0046872|metal ion binding|IEA; GO:0098655||IEA
FEX_0002469-mRNA1	F3x4	PositiveSelection	-3206.761664	0.06109	1.00000	0.06109	1.00000	0.06109	1.00000	16.81376	16.81376	209_D_0.950*;278_H_0.552;284_F_0.569;	Lysine-specific demethylase no66-like protein (Fragment)	Lasius niger	GO:0008168|methyltransferase activity|IEA; GO:0032259|methylation|IEA
FEX_0009302-mRNA1	F3x4	PositiveSelection	-2199.935188	0.07020	1.00000	0.07020	1.00000	0.07020	1.00000	25.65192	25.65192	39_L_0.610;129_I_0.718;155_T_0.982*;169_N_0.731;	Exosome complex exonuclease rrp42	Camponotus floridanus	GO:0004527|exonuclease activity|IEA; GO:0090305|nucleic acid phosphodiester bond hydrolysis|IEA
FEX_0005509-mRNA1	F3x4	PositiveSelection	-1923.763048	0.03236	1.00000	0.03236	1.00000	0.03236	1.00000	9.77417	9.77417	68_M_0.534;146_G_0.602;229_T_0.534;233_G_0.967*;	Transcription factor AP-1	Lasius niger	GO:0003677|DNA binding|IEA; GO:0003700|sequence-specific DNA binding transcription factor activity|IEA; GO:0006355|regulation of transcription, DNA-dependent|IEA; GO:0043565|sequence-specific DNA binding|IEA
FEX_0003334-mRNA1	F3x4	PositiveSelection	-3621.611653	0.06564	1.00000	0.06564	1.00000	0.06564	1.00000	7.77199	7.77199	113_D_0.614;127_E_0.963*;134_K_0.691;139_V_0.608;292_D_0.577;301_Y_0.930;314_N_0.614;359_A_0.629;403_L_0.540;439_V_0.766;	FERM_C multi-domain protein	Camponotus floridanus	NA
FEX_0009561-mRNA1	F3x4	PositiveSelection	-3414.121339	0.06312	1.00000	0.06312	1.00000	0.06312	1.00000	57.73369	57.73369	16_G_0.711;124_K_0.522;192_Q_0.588;212_A_0.683;240_N_0.999**;241_D_0.569;242_N_0.976*;243_M_0.991**;244_Q_0.972*;322_L_0.540;328_H_0.647;371_T_0.675;	Unassigned protein	Camponotus floridanus	NA
FEX_0009628-mRNA1	F3x4	PositiveSelection	-3622.435969	0.04155	1.00000	0.04155	1.00000	0.04155	1.00000	999.00000	999.00000	8_A_0.760;9_L_0.788;67_E_0.609;202_S_0.748;253_I_0.773;261_P_0.635;387_R_0.999**;388_V_0.995**;389_Q_0.943;390_F_0.947;391_L_0.992**;396_E_0.983*;397_M_0.966*;398_S_0.839;399_M_0.924;401_R_0.999**;402_E_0.945;404_Q_0.722;405_L_0.993**;406_N_0.801;407_N_1.000**;408_Y_0.993**;409_E_1.000**;410_N_0.990**;411_M_0.654;412_Y_0.993**;413_H_0.999**;415_R_0.782;	Gata zinc finger domain-containing protein 14-like protein	Lasius niger	NA
FEX_0009588-mRNA1	F3x4	PositiveSelection	-2004.895839	0.04111	1.00000	0.04111	1.00000	0.04111	1.00000	510.94632	510.94632	90_P_0.729;171_L_0.955*;177_K_0.879;178_D_1.000**;179_I_0.998**;180_T_0.999**;181_S_0.978*;182_K_1.000**;183_L_0.998**;184_Y_0.992**;185_A_0.945;186_L_0.945;187_N_1.000**;188_E_1.000**;189_Q_0.925;190_V_1.000**;191_T_0.939;192_S_1.000**;194_N_0.998**;195_A_0.999**;196_T_1.000**;197_S_0.988*;198_N_1.000**;200_Y_1.000**;203_V_0.960*;204_T_0.902;205_R_0.996**;206_S_0.951*;207_L_0.746;208_S_1.000**;2…	Popeye domain-containing protein 2	Lasius niger	GO:0016020|membrane|IEA; GO:0016021|integral to membrane|IEA
FEX_0009555-mRNA1	F3x4	PositiveSelection	-3896.516448	0.03898	1.00000	0.03898	1.00000	0.03898	1.00000	264.82367	264.82367	40_L_0.590;120_D_0.592;122_F_0.678;151_Q_0.621;196_R_0.597;299_V_0.990**;382_V_0.543;420_V_0.558;	5-aminolevulinate synthase	Camponotus floridanus	GO:0003824|catalytic activity|IEA; GO:0003870|5-aminolevulinate synthase activity|IEA; GO:0005739|mitochondrion|IEA; GO:0005759|mitochondrial matrix|IEA; GO:0006782|protoporphyrinogen IX biosynthetic process|IEA; GO:0006783|heme biosynthetic process|IEA; GO:0009058|biosynthetic process|IEA; GO:0016740|transferase activity|IEA; GO:0016746|transferase activity, transferring acyl groups|IEA; GO:0030…
FEX_0004479-mRNA1	F3x4	PositiveSelection	-6733.473052	0.13401	1.00000	0.13401	1.00000	0.13401	1.00000	68.69288	68.69288	2_E_0.988*;3_M_0.539;4_E_0.970*;5_A_0.808;11_L_0.930;12_Q_0.710;14_I_0.958*;15_C_0.804;16_E_0.965*;	Sperm flagellar protein 2	Lasius niger	GO:0031514|motile cilium|IEA
FEX_0004469-mRNA1	F3x4	PositiveSelection	-1726.828283	0.03199	1.00000	0.03199	1.00000	0.03199	1.00000	999.00000	999.00000	186_A_0.999**;187_A_0.932;188_N_0.947;189_R_1.000**;190_S_1.000**;192_V_0.999**;193_F_0.991**;194_L_0.928;195_W_0.998**;197_G_0.998**;198_S_0.995**;199_S_0.942;200_D_0.998**;201_G_0.997**;202_L_0.989*;203_D_0.999**;204_M_0.936;205_G_0.998**;206_R_1.000**;207_F_0.992**;208_C_0.948;210_R_0.999**;211_K_1.000**;212_W_0.994**;213_G_0.857;214_F_0.945;215_R_0.999**;216_R_0.944;217_C_1.000**;218_E_0.861;	Methyltransferase-like protein KIAA1627-like protein	Camponotus floridanus	GO:0006139|nucleobase-containing compound metabolic process|IEA; GO:0008168|methyltransferase activity|IEA; GO:0016740|transferase activity|IEA; GO:0032259|methylation|IEA
FEX_0008786-mRNA1	F3x4	PositiveSelection	-1326.762376	0.04698	1.00000	0.04698	1.00000	0.04698	1.00000	5.60613	5.60613	36_A_0.698;93_A_0.716;98_V_0.715;141_G_0.706;145_F_0.949;146_E_0.986*;	Thymidylate kinase	Lasius niger	GO:0004798|thymidylate kinase activity|IEA; GO:0005524|ATP binding|IEA; GO:0006233|dTDP biosynthetic process|IEA; GO:0016301|kinase activity|IEA; GO:0016310|phosphorylation|IEA; GO:0046939|nucleotide phosphorylation|IEA
FEX_0003166-mRNA3	F3x4	PositiveSelection	-3880.696974	0.08418	1.00000	0.08418	1.00000	0.08418	1.00000	85.47294	85.47294	190_T_0.575;235_G_0.593;355_D_0.589;383_Q_0.514;384_E_0.702;385_T_0.767;386_A_0.540;387_R_0.956*;389_L_0.948;390_E_0.866;394_Q_0.947;395_S_0.733;396_R_0.691;	Trichoplein multi-domain protein	Camponotus floridanus	NA
FEX_0011042-mRNA1	F3x4	PositiveSelection	-2281.585252	0.03056	1.00000	0.03056	1.00000	0.03056	1.00000	999.00000	999.00000	34_Q_0.994**;35_Y_0.969*;36_S_0.991**;	Homeobox protein SIX4	Lasius niger	GO:0003677|DNA binding|IEA; GO:0005634|nucleus|IEA; GO:0006355|regulation of transcription, DNA-dependent|IEA; GO:0043565|sequence-specific DNA binding|IEA
FEX_0012541-mRNA1	F3x4	PositiveSelection	-2419.106046	0.01808	1.00000	0.01808	1.00000	0.01808	1.00000	998.97284	998.97284	22_M_0.534;40_M_0.611;93_M_0.791;249_C_0.926;250_T_0.999**;251_I_1.000**;252_F_0.998**;254_K_0.995**;255_L_0.797;256_L_0.851;257_S_0.999**;258_V_1.000**;259_L_1.000**;260_T_0.999**;261_E_0.745;262_L_0.890;263_R_1.000**;264_T_0.739;266_G_0.891;267_N_0.999**;269_N_1.000**;270_S_0.723;271_E_0.976*;272_M_0.998**;274_L_0.999**;275_N_0.995**;276_L_0.979*;277_K_0.999**;280_K_1.000**;281_L_0.876;282_P_1.…	Ecdysone receptor A isoform	Camponotus japonicus	GO:0003677|DNA binding|IEA; GO:0003700|sequence-specific DNA binding transcription factor activity|IEA; GO:0003707|steroid hormone receptor activity|IEA; GO:0004884|ecdysteroid hormone receptor activity|IEA; GO:0005496|steroid binding|IEA; GO:0005634|nucleus|IEA; GO:0006351|transcription, DNA-dependent|IEA; GO:0006355|regulation of transcription, DNA-dependent|IEA; GO:0008270|zinc ion binding|IEA…
FEX_0008608-mRNA1	F3x4	PositiveSelection	-3109.656616	0.02958	1.00000	0.02958	1.00000	0.02958	1.00000	7.68922	7.68922	51_Q_0.959*;152_S_0.563;	Lipoma-preferred partner-like protein	Camponotus floridanus	GO:0008270|zinc ion binding|IEA; GO:0046872|metal ion binding|IEA
FEX_0008633-mRNA2	F3x4	PositiveSelection	-4257.598841	0.03928	1.00000	0.03928	1.00000	0.03928	1.00000	6.88718	6.88718	161_D_0.501;191_S_0.549;215_R_0.504;258_A_0.540;293_L_0.570;373_V_0.551;387_Y_0.622;430_R_0.504;466_T_0.545;476_C_0.979*;	pfam01607, CBM_14, Chitin binding Peritrophin-A domain	Camponotus floridanus	NA
FEX_0002126-mRNA1	F3x4	PositiveSelection	-4074.851923	0.00461	1.00000	0.00461	1.00000	0.00461	1.00000	999.00000	999.00000	544_P_0.998**;547_G_0.725;548_T_0.575;549_E_0.564;550_P_0.737;552_V_0.860;554_S_0.997**;555_Q_0.938;556_A_0.999**;557_F_0.955*;558_L_0.995**;559_T_0.997**;	Protein MON2-like protein	Lasius niger	NA
FEX_0001290-mRNA1	F3x4	PositiveSelection	-6546.711811	0.06538	1.00000	0.06538	1.00000	0.06538	1.00000	999.00000	999.00000	18_A_0.580;98_V_0.609;180_V_0.571;275_T_0.807;369_P_0.821;403_A_0.994**;453_P_0.681;473_S_0.663;501_E_0.678;575_A_0.621;631_G_0.867;698_L_0.730;703_P_0.925;705_S_0.990*;707_D_0.980*;708_A_0.998**;709_L_0.942;710_V_0.995**;711_N_0.999**;712_S_0.997**;713_A_0.996**;714_A_0.999**;715_E_0.997**;716_Q_0.998**;717_M_0.769;718_V_0.821;719_S_1.000**;720_P_0.999**;721_S_0.969*;722_V_0.880;723_N_0.998**;72…	Nuclear factor of activated T-cells 5	Lasius niger	GO:0003677|DNA binding|IEA; GO:0003700|sequence-specific DNA binding transcription factor activity|IEA; GO:0005634|nucleus|IEA; GO:0006355|regulation of transcription, DNA-dependent|IEA
FEX_0005583-mRNA1	F3x4	PositiveSelection	-6821.759719	0.06071	1.00000	0.06071	1.00000	0.06071	1.00000	34.73460	34.73460	165_R_0.535;223_I_0.505;258_I_0.514;259_M_0.667;260_Q_0.950*;263_L_0.975*;268_M_0.787;269_F_0.555;356_E_0.878;415_T_0.576;581_P_0.959*;	Transmembrane channel-like protein 7	Camponotus floridanus	GO:0016020|membrane|IEA; GO:0016021|integral to membrane|IEA
FEX_0012581-mRNA1	F3x4	PositiveSelection	-2444.602771	0.08844	1.00000	0.08844	1.00000	0.08844	1.00000	22.54487	22.54487	14_M_0.737;18_L_0.717;44_E_0.512;123_D_0.813;133_L_0.636;141_N_0.564;157_D_0.634;221_D_0.531;222_I_0.878;223_I_0.523;224_R_0.994**;225_I_0.759;226_E_0.771;	Unconventional prefoldin RPB5 interactor	Camponotus floridanus	NA
FEX_0006983-mRNA1	F3x4	PositiveSelection	-737.758545	0.13911	1.00000	0.13911	1.00000	0.13911	1.00000	352.39234	352.39234	58_A_0.779;59_G_0.963*;60_V_1.000**;62_K_1.000**;63_H_0.877;64_P_0.995**;65_N_0.990**;66_A_0.993**;67_T_0.996**;68_S_0.970*;69_K_0.990**;70_D_0.989*;71_A_0.999**;73_E_0.851;74_E_0.992**;75_N_0.994**;76_R_0.980*;78_N_0.994**;79_H_0.880;80_E_0.998**;	Glucuronate isomerase	Lasius niger	GO:0003677|DNA binding|IEA; GO:0008152|metabolic process|IEA; GO:0016853|isomerase activity|IEA
FEX_0013616-mRNA1	F3x4	PositiveSelection	-695.482546	0.02527	1.00000	0.02527	1.00000	0.02527	1.00000	109.26966	109.26966	1_M_0.525;2_D_0.525;3_T_0.699;4_L_0.525;5_F_0.525;6_T_0.525;7_P_0.525;8_N_0.525;9_V_0.525;10_P_0.525;11_D_0.525;12_E_0.525;13_A_0.525;14_E_0.525;15_D_0.525;16_I_0.525;17_P_0.525;18_Q_0.964*;19_T_0.525;20_D_0.525;21_E_0.525;22_P_0.525;23_V_0.525;24_W_0.525;25_I_0.525;26_L_0.525;27_G_0.525;28_R_0.525;29_K_0.525;30_Y_0.525;31_N_0.525;32_A_0.525;33_I_0.525;34_K_0.525;35_E_0.525;36_L_0.525;37_D_0.525;…	Cysteine protease ATG4B	Solenopsis invicta	GO:0005737|cytoplasm|IEA; GO:0006508|proteolysis|IEA; GO:0006810|transport|IEA; GO:0006914|autophagy|IEA; GO:0008233|peptidase activity|IEA; GO:0008234|cysteine-type peptidase activity|IEA; GO:0015031|protein transport|IEA; GO:0016787|hydrolase activity|IEA
FEX_0007315-mRNA1	F3x4	PositiveSelection	-992.410623	0.00372	1.00000	0.00372	1.00000	0.00372	1.00000	39.89488	39.89488	36_S_0.562;99_Y_1.000**;100_K_0.998**;101_E_0.999**;102_K_0.999**;103_G_0.998**;104_T_0.999**;105_T_0.788;106_P_0.996**;110_A_1.000**;111_A_0.998**;112_R_1.000**;113_A_0.999**;114_G_0.994**;115_Q_0.998**;116_A_0.914;117_L_0.999**;118_Q_0.999**;119_V_0.815;120_E_0.999**;121_G_1.000**;123_N_0.831;	ARF GTPase-activating protein GIT1	Camponotus floridanus	GO:0005096|GTPase activator activity|IEA; GO:0043547|positive regulation of GTPase activity|IEA
FEX_0007371-mRNA2	F3x4	PositiveSelection	-2090.280675	0.00820	1.00000	0.00820	1.00000	0.00820	1.00000	999.00000	999.00000	215_S_0.986*;	Protein bric-a-brac 1	Camponotus floridanus	GO:0003677|DNA binding|IEA
FEX_0007388-mRNA1	F3x4	PositiveSelection	-4091.691821	0.03785	1.00000	0.03785	1.00000	0.03785	1.00000	244.15871	244.15871	526_P_0.991**;527_L_0.988*;528_W_0.643;530_P_0.638;531_A_0.690;532_S_0.976*;533_W_0.618;	MAGUK p55 subfamily member 7	Camponotus floridanus	NA
FEX_0008660-mRNA1	F3x4	PositiveSelection	-3583.318946	0.06086	1.00000	0.06086	1.00000	0.06086	1.00000	68.81299	68.81299	63_L_0.866;99_T_0.601;212_K_0.677;240_P_0.951*;241_W_0.638;354_G_0.951*;357_L_0.597;	Transporter	Camponotus floridanus	GO:0005328|neurotransmitter:sodium symporter activity|IEA; GO:0006810|transport|IEA; GO:0006836|neurotransmitter transport|IEA; GO:0015293|symporter activity|IEA; GO:0016020|membrane|IEA; GO:0016021|integral to membrane|IEA; GO:0055085|transmembrane transport|IEA
FEX_0007671-mRNA1	F3x4	PositiveSelection	-3337.692774	0.10047	1.00000	0.10047	1.00000	0.10047	1.00000	999.00000	999.00000	43_E_0.670;131_V_0.568;140_R_0.733;141_S_0.674;249_E_0.536;321_N_0.701;322_S_0.997**;325_V_0.955*;326_N_0.713;328_S_0.998**;329_S_0.995**;331_V_0.991**;333_V_0.996**;334_V_0.997**;336_I_0.824;337_L_0.991**;338_N_0.999**;339_G_0.937;340_Q_0.999**;341_K_0.999**;342_L_0.994**;343_T_0.848;344_L_0.820;346_I_0.820;348_I_0.989*;349_H_0.901;350_P_0.813;351_V_0.999**;352_N_0.573;353_D_0.999**;354_E_0.933;…	pfam00100, Zona_pellucida, Zona pellucida-like domain	Linepithema humile	NA
FEX_0008750-mRNA1	F3x4	PositiveSelection	-3127.739333	0.01196	1.00000	0.01196	1.00000	0.01196	1.00000	999.00000	999.00000	114_I_0.895;167_E_0.566;248_A_0.966*;278_L_0.829;284_K_0.878;332_P_0.963*;333_Y_1.000**;334_N_0.955*;335_P_0.953*;336_K_0.883;337_N_0.911;338_L_1.000**;339_P_0.959*;340_L_0.993**;341_G_0.999**;342_W_0.949;344_P_0.967*;345_I_0.970*;346_P_0.970*;347_Y_1.000**;348_W_0.955*;349_L_1.000**;350_Y_1.000**;351_K_1.000**;352_L_0.999**;353_H_0.960*;354_G_0.992**;356_N_0.929;357_I_0.918;358_S_1.000**;359_Y_0…	Splicing factor 3A subunit 3	Camponotus floridanus	GO:0000398|nuclear mRNA splicing, via spliceosome|IEA; GO:0003676|nucleic acid binding|IEA; GO:0003723|RNA binding|IEA; GO:0005576|extracellular region|IEA; GO:0005634|nucleus|IEA; GO:0005681|spliceosomal complex|IEA; GO:0006629|lipid metabolic process|IEA; GO:0008270|zinc ion binding|IEA; GO:0008970|phosphatidylcholine 1-acylhydrolase activity|IEA; GO:0052689|carboxylic ester hydrolase activity|…
FEX_0007627-mRNA1	F3x4	PositiveSelection	-1230.164974	0.00000	1.00000	0.00000	1.00000	0.00000	1.00000	999.00000	999.00000	213_C_0.979*;214_K_0.988*;	Ras-related protein Rab-5C	Lasius niger	GO:0000166|nucleotide binding|IEA; GO:0005525|GTP binding|IEA; GO:0005622|intracellular|IEA; GO:0007264|small GTPase mediated signal transduction|IEA; GO:0015031|protein transport|IEA
FEX_0005851-mRNA10	F3x4	PositiveSelection	-5385.918540	0.00721	1.00000	0.00721	1.00000	0.00721	1.00000	999.00000	999.00000	1_A_0.995**;2_V_0.941;3_T_0.939;549_A_0.706;	Vacuolar protein sorting-associated protein 35	Camponotus floridanus	GO:0005622|intracellular|IEA; GO:0008565|protein transporter activity|IEA; GO:0015031|protein transport|IEA; GO:0030904|retromer complex|IEA; GO:0042147|retrograde transport, endosome to Golgi|IEA
FEX_0007625-mRNA1	F3x4	PositiveSelection	-3426.235088	0.02456	1.00000	0.02456	1.00000	0.02456	1.00000	158.83756	158.83756	81_A_0.898;272_L_0.601;278_A_0.675;450_I_0.998**;	Sialin	Camponotus floridanus	GO:0016020|membrane|IEA; GO:0016021|integral to membrane|IEA; GO:0055085|transmembrane transport|IEA
FEX_0000728-mRNA1	F3x4	PositiveSelection	-1678.753685	0.00981	1.00000	0.00981	1.00000	0.00981	1.00000	14.26192	14.26192	30_D_0.715;31_L_0.961*;33_L_0.693;47_F_0.679;129_V_0.530;	Neuropeptide FF receptor 2	Pogonomyrmex barbatus	GO:0004930|G-protein coupled receptor activity|IEA; GO:0007186|G-protein coupled receptor signaling pathway|IEA; GO:0007218|neuropeptide signaling pathway|IEA; GO:0016020|membrane|IEA; GO:0016021|integral to membrane|IEA
FEX_0007933-mRNA1	F3x4	PositiveSelection	-2887.414900	0.04398	1.00000	0.04398	1.00000	0.04398	1.00000	27.33659	27.33659	71_G_0.980*;77_T_0.639;144_N_0.554;222_T_0.971*;292_L_0.545;	UNC93-like protein	Cerapachys biroi	GO:0016020|membrane|IEA; GO:0016021|integral to membrane|IEA
FEX_0005438-mRNA1	F3x4	PositiveSelection	-5139.474855	0.06905	1.00000	0.06905	1.00000	0.06905	1.00000	18.68828	18.68828	223_K_0.767;289_V_0.937;337_G_0.996**;418_S_0.784;477_L_0.513;	Probable cytochrome P450 49a1	Camponotus floridanus	GO:0004497|monooxygenase activity|IEA; GO:0005506|iron ion binding|IEA; GO:0016491|oxidoreductase activity|IEA; GO:0016705|oxidoreductase activity, acting on paired donors, with incorporation or reduction of molecular oxygen|IEA; GO:0020037|heme binding|IEA; GO:0046872|metal ion binding|IEA; GO:0055114|oxidation-reduction process|IEA
FEX_0011051-mRNA1	F3x4	PositiveSelection	-2861.325929	0.06659	1.00000	0.06659	1.00000	0.06659	1.00000	6.33264	6.33264	109_M_0.722;113_N_0.718;157_M_0.716;172_G_0.954*;178_P_0.734;195_P_0.741;256_A_0.751;346_V_0.716;	Myocyte-specific enhancer factor 2	Wasmannia auropunctata	GO:0003677|DNA binding|IEA; GO:0005634|nucleus|IEA; GO:0006351|transcription, DNA-dependent|IEA; GO:0006355|regulation of transcription, DNA-dependent|IEA; GO:0046983|protein dimerization activity|IEA
FEX_0005787-mRNA2	F3x4	PositiveSelection	-1427.666469	0.12687	1.00000	0.12687	1.00000	0.12687	1.00000	5.85007	5.85007	10_L_0.578;17_S_0.646;25_S_0.559;31_L_0.517;49_L_0.632;52_E_0.995**;53_Q_0.562;54_S_0.969*;62_Y_0.552;69_N_0.571;76_L_0.901;84_L_0.974*;86_S_0.989*;88_A_0.973*;90_R_0.993**;91_N_0.545;92_S_0.936;93_G_0.806;94_V_0.982*;95_A_0.713;96_N_0.640;97_M_0.934;98_A_0.958*;99_A_0.521;101_E_0.998**;102_L_0.910;103_R_0.971*;104_Q_0.656;106_R_0.992**;107_T_0.984*;108_R_0.988*;110_E_0.585;111_G_0.956*;113_N_0.9…	Myosin light chain smooth muscle	Lasius niger	NA
FEX_0005066-mRNA7	F3x4	PositiveSelection	-7654.081279	0.05843	1.00000	0.05843	1.00000	0.05843	1.00000	36.76786	36.76786	11_R_0.663;53_S_0.572;83_T_0.591;134_T_0.593;138_E_0.598;157_S_0.976*;242_A_0.947;689_S_0.573;704_E_0.591;705_Q_0.558;706_I_0.608;	Ribosomal protein S6 kinase	Camponotus floridanus	GO:0000166|nucleotide binding|IEA; GO:0000287|magnesium ion binding|IEA; GO:0004672|protein kinase activity|IEA; GO:0004674|protein serine/threonine kinase activity|IEA; GO:0005524|ATP binding|IEA; GO:0005622|intracellular|IEA; GO:0006468|protein phosphorylation|IEA; GO:0016301|kinase activity|IEA; GO:0016310|phosphorylation|IEA; GO:0016740|transferase activity|IEA; GO:0035556|intracellular signa…
FEX_0009207-mRNA1	F3x4	PositiveSelection	-2138.976653	0.06089	1.00000	0.06089	1.00000	0.06089	1.00000	15.09744	15.09744	6_E_0.992**;10_T_0.661;13_K_0.759;68_M_0.907;88_S_0.590;104_A_0.902;117_E_0.657;146_L_0.899;169_L_0.895;171_S_0.786;186_K_0.924;188_V_0.595;190_D_0.604;	Ribosomal rna processing 36-like protein	Lasius niger	GO:0005634|nucleus|IEA; GO:0006364|rRNA processing|IEA; GO:0042254|ribosome biogenesis|IEA
FEX_0009206-mRNA1	F3x4	PositiveSelection	-2845.603535	0.03050	1.00000	0.03050	1.00000	0.03050	1.00000	51.46994	51.46994	32_D_0.597;152_S_0.979*;299_K_0.527;324_L_0.531;	Helicase SKI2W	Camponotus floridanus	GO:0003676|nucleic acid binding|IEA; GO:0003723|RNA binding|IEA; GO:0003724|RNA helicase activity|IEA; GO:0004386|helicase activity|IEA; GO:0005524|ATP binding|IEA; GO:0006401|RNA catabolic process|IEA; GO:0016787|hydrolase activity|IEA
FEX_0009629-mRNA1	F3x4	PositiveSelection	-9700.264834	0.09644	1.00000	0.09644	1.00000	0.09644	1.00000	3.41937	3.41937	7_I_0.510;58_A_0.509;94_Y_0.556;156_I_0.508;158_S_0.805;314_L_0.562;316_D_0.989*;486_A_0.577;582_F_0.505;590_Q_0.503;602_F_0.539;615_L_0.530;808_F_0.559;810_Q_0.956*;811_Q_0.907;812_V_0.527;814_Q_0.830;815_D_0.954*;816_R_0.697;	Gata zinc finger domain-containing protein 14-like protein	Lasius niger	NA
FEX_0002303-mRNA1	F3x4	PositiveSelection	-2445.115977	0.08643	1.00000	0.08643	1.00000	0.08643	1.00000	83.45863	83.45863	94_T_0.613;124_L_0.875;158_I_0.835;167_D_0.747;168_I_0.616;181_T_0.609;202_M_0.781;223_I_0.749;239_L_0.855;240_Q_0.999**;241_K_0.952*;242_E_0.708;243_Q_0.995**;244_T_0.996**;245_E_0.997**;247_L_0.667;250_I_0.980*;251_Q_0.999**;252_A_0.973*;253_K_0.998**;254_R_0.998**;255_L_0.875;	Dna-directed rna polymerase ii subunit grinl1a isoform x2	Camponotus floridanus	GO:0003899|DNA-directed RNA polymerase activity|IEA; GO:0016591|DNA-directed RNA polymerase II, holoenzyme|IEA; GO:0032774|RNA biosynthetic process|IEA
FEX_0002302-mRNA1	F3x4	PositiveSelection	-6574.715230	0.04703	1.00000	0.04703	1.00000	0.04703	1.00000	53.29510	53.29510	40_L_0.778;46_D_0.630;114_L_0.721;120_Y_0.743;233_G_0.789;371_K_0.749;479_M_0.600;578_V_0.537;587_R_0.588;617_P_0.502;679_S_0.738;699_P_0.733;712_Q_0.992**;780_E_0.575;882_V_0.863;883_T_0.956*;884_G_0.613;886_T_0.978*;887_S_0.924;	Trafficking protein particle complex subunit 10	Camponotus floridanus	NA
FEX_0007216-mRNA1	F3x4	PositiveSelection	-6136.687032	0.08295	1.00000	0.08295	1.00000	0.08295	1.00000	117.15092	117.15092	1_M_0.944;3_T_0.555;18_L_0.691;23_D_0.661;88_Y_0.817;95_N_0.751;188_S_0.768;197_S_0.985*;198_Y_0.816;199_D_0.556;202_I_0.676;203_E_0.989*;254_S_0.606;255_S_0.706;256_N_0.777;327_E_0.754;331_G_0.732;	Protein bric-a-brac 1	Lasius niger	GO:0003677|DNA binding|IEA
FEX_0000594-mRNA1	F3x4	PositiveSelection	-2592.015298	0.04925	1.00000	0.04925	1.00000	0.04925	1.00000	91.86413	91.86413	224_S_0.511;247_T_0.990*;274_S_0.908;275_N_0.964*;276_A_0.718;277_A_0.978*;278_I_0.925;	Inorganic phosphate cotransporter-like protein	Lasius niger	GO:0016020|membrane|IEA; GO:0016021|integral to membrane|IEA; GO:0055085|transmembrane transport|IEA
FEX_0006310-mRNA2	F3x4	PositiveSelection	-3433.386007	0.04486	1.00000	0.04486	1.00000	0.04486	1.00000	51.25237	51.25237	3_A_0.995**;234_P_0.765;353_P_0.519;414_N_0.994**;416_Q_0.999**;417_N_0.994**;418_Q_0.950*;419_Q_0.971*;420_F_0.999**;421_E_0.997**;422_D_0.690;423_V_0.995**;426_Y_0.994**;427_D_0.993**;	Mediator of RNA polymerase II transcription subunit 25	Lasius niger	NA
FEX_0013041-mRNA1	F3x4	PositiveSelection	-4006.824610	0.06645	1.00000	0.06645	1.00000	0.06645	1.00000	42.18310	42.18310	1_A_0.968*;2_D_0.919;3_S_0.947;37_A_0.665;89_R_0.548;169_E_0.582;171_A_0.550;	ADP-ribosylation factor GTPase-activating protein 3	Camponotus floridanus	GO:0005096|GTPase activator activity|IEA; GO:0043547|positive regulation of GTPase activity|IEA
FEX_0006319-mRNA4	F3x4	PositiveSelection	-8101.186835	0.06757	1.00000	0.06757	1.00000	0.06757	1.00000	73.50087	73.50087	52_S_0.684;161_E_0.624;189_P_0.614;195_W_0.657;225_P_0.992**;227_R_0.999**;228_T_0.998**;231_N_0.563;236_T_0.745;237_L_0.969*;238_V_0.992**;239_Q_0.998**;240_P_0.862;241_S_0.998**;272_M_0.569;374_R_0.801;436_D_0.978*;484_N_0.627;511_P_0.614;532_L_0.625;553_G_0.794;589_S_0.594;696_V_0.517;737_V_0.518;	Actin-binding protein anillin	Lasius niger	NA
FEX_0000611-mRNA1	F3x4	PositiveSelection	-4906.501729	0.02095	1.00000	0.02095	1.00000	0.02095	1.00000	9.21079	9.21079	72_G_0.698;519_G_0.714;532_G_0.983*;541_Q_0.717;631_G_0.661;643_G_0.712;670_T_0.539;	Far upstream element-binding protein 1	Camponotus floridanus	GO:0003676|nucleic acid binding|IEA; GO:0003723|RNA binding|IEA; GO:0008152|metabolic process|IEA; GO:0016746|transferase activity, transferring acyl groups|IEA
FEX_0013043-mRNA1	F3x4	PositiveSelection	-4439.059569	0.01732	1.00000	0.01732	1.00000	0.01732	1.00000	6.53408	6.53408	551_V_0.969*;567_V_0.952*;	ATP-dependent Clp protease ATP-binding subunit clpX-like, mitochondrial	Camponotus floridanus	GO:0000166|nucleotide binding|IEA; GO:0005524|ATP binding|IEA; GO:0006457|protein folding|IEA; GO:0006508|proteolysis|IEA; GO:0008233|peptidase activity|IEA; GO:0051082|unfolded protein binding|IEA
FEX_0001173-mRNA1	F3x4	PositiveSelection	-4261.320208	0.03288	1.00000	0.03288	1.00000	0.03288	1.00000	999.00000	999.00000	270_V_0.993**;354_C_0.818;360_L_0.828;422_T_0.741;441_K_0.720;471_T_0.903;474_T_1.000**;475_G_0.983*;476_G_0.999**;477_Q_0.873;478_K_0.999**;479_F_0.975*;480_V_0.860;481_L_0.998**;482_Q_0.996**;484_R_0.996**;486_I_0.894;487_S_0.957*;488_N_0.998**;489_I_0.826;490_N_0.873;491_T_0.976*;492_T_0.687;493_I_0.720;494_I_0.977*;495_Q_0.982*;496_Q_0.880;497_Q_0.997**;	Transcription initiation factor tfiid subunit 6-like protein	Camponotus floridanus	GO:0003743|translation initiation factor activity|IEA; GO:0005634|nucleus|IEA; GO:0006352|transcription initiation, DNA-dependent|IEA; GO:0006413|translational initiation|IEA; GO:0046982|protein heterodimerization activity|IEA; GO:0051090|regulation of sequence-specific DNA binding transcription factor activity|IEA
FEX_0005010-mRNA1	F3x4	PositiveSelection	-5193.490928	0.02040	1.00000	0.02040	1.00000	0.02040	1.00000	999.00000	999.00000	156_D_0.679;494_P_0.604;495_R_0.586;573_E_0.580;595_G_0.892;596_R_0.895;597_D_1.000**;598_K_0.677;599_N_0.992**;600_I_0.814;607_Q_0.997**;608_L_0.899;609_L_0.997**;610_N_1.000**;611_L_0.700;612_V_1.000**;613_A_0.999**;615_L_0.860;617_S_0.718;618_E_0.998**;619_A_0.997**;620_V_0.999**;	Integrator complex subunit 1	Camponotus floridanus	NA
FEX_0006957-mRNA1	F3x4	PositiveSelection	-1830.020434	0.04661	1.00000	0.04661	1.00000	0.04661	1.00000	5.43141	5.43141	116_N_0.985*;134_D_0.619;145_D_0.615;147_N_0.740;149_K_0.586;155_D_0.741;170_S_0.691;182_P_0.717;183_T_0.801;	pfam00071, Ras, Ras family	Camponotus floridanus	NA
FEX_0006567-mRNA1	F3x4	PositiveSelection	-4655.072064	0.01817	1.00000	0.01817	1.00000	0.01817	1.00000	999.00000	999.00000	459_I_0.972*;537_T_0.615;553_M_0.997**;554_I_0.972*;555_N_0.778;556_I_0.967*;557_D_0.619;558_S_0.770;559_A_0.678;560_I_0.972*;561_A_1.000**;562_S_0.999**;563_Y_0.920;564_E_0.999**;565_S_0.988*;566_T_0.906;567_K_0.999**;568_I_0.972*;571_I_0.985*;572_A_0.999**;573_I_0.760;574_V_0.999**;575_E_0.633;576_A_0.998**;578_S_0.886;579_K_0.584;580_T_0.761;582_P_0.999**;583_S_1.000**;	Integrator complex subunit 2	Camponotus floridanus	GO:0016180|snRNA processing|IEA; GO:0032039|integrator complex|IEA
FEX_0003448-mRNA1	F3x4	PositiveSelection	-2185.004723	0.10767	1.00000	0.10767	1.00000	0.10767	1.00000	13.77318	13.77318	13_K_0.510;14_T_0.619;15_S_0.981*;55_A_0.523;107_L_0.605;119_M_0.944;168_A_0.653;	Repetitive proline-rich cell wall	Camponotus floridanus	NA
FEX_0011460-mRNA1	F3x4	PositiveSelection	-5340.583793	0.07669	1.00000	0.07669	1.00000	0.07669	1.00000	71.87515	71.87515	50_P_0.520;197_P_0.502;219_N_0.537;220_K_0.517;224_K_0.822;227_L_0.595;398_S_0.542;416_D_0.952*;	Putative sodium-coupled neutral amino acid transporter 10	Camponotus floridanus	GO:0016020|membrane|IEA; GO:0016021|integral to membrane|IEA
FEX_0001942-mRNA1	F3x4	PositiveSelection	-5257.102665	0.09297	1.00000	0.09297	1.00000	0.09297	1.00000	2.70908	2.70908	1_M_0.732;2_N_0.539;6_S_0.908;12_T_0.855;14_V_0.809;18_I_0.707;20_A_0.654;26_D_0.821;34_D_0.519;86_G_0.866;90_N_0.547;92_I_0.666;95_S_0.892;99_N_0.820;116_G_0.710;120_T_0.853;131_G_0.984*;134_H_0.853;148_R_0.863;155_V_0.509;174_D_0.866;181_K_0.817;182_R_0.765;185_K_0.815;187_G_0.865;189_L_0.861;190_M_0.729;197_H_0.834;200_D_0.700;210_S_0.922;215_K_0.902;216_T_0.821;220_K_0.816;221_E_0.829;228_M_0…	Glucose dehydrogenase	0	GO:0016020|membrane|IEA; GO:0016021|integral to membrane|IEA; GO:0016491|oxidoreductase activity|IEA; GO:0016614|oxidoreductase activity, acting on CH-OH group of donors|IEA; GO:0050660|flavin adenine dinucleotide binding|IEA; GO:0055114|oxidation-reduction process|IEA
FEX_0001709-mRNA1	F3x4	PositiveSelection	-4473.352144	0.05914	1.00000	0.05914	1.00000	0.05914	1.00000	6.32864	6.32864	106_C_0.598;129_T_0.967*;147_D_0.686;204_I_0.549;215_Q_0.616;237_D_0.545;320_L_0.651;332_K_0.545;338_F_0.598;342_A_0.637;354_A_0.982*;358_S_0.678;	Glucose dehydrogenase	Lasius niger	GO:0016491|oxidoreductase activity|IEA; GO:0016614|oxidoreductase activity, acting on CH-OH group of donors|IEA; GO:0050660|flavin adenine dinucleotide binding|IEA; GO:0055114|oxidation-reduction process|IEA
FEX_0010507-mRNA1	F3x4	PositiveSelection	-2074.588648	0.04060	1.00000	0.04060	1.00000	0.04060	1.00000	999.00000	999.00000	42_K_0.862;83_P_0.921;84_V_0.917;166_D_0.863;200_R_0.892;232_L_0.926;233_I_0.991**;234_K_1.000**;235_N_0.894;237_R_0.949;238_K_0.932;239_H_0.999**;240_D_0.999**;241_A_1.000**;242_L_0.999**;243_P_0.999**;244_A_0.999**;246_E_0.994**;247_K_1.000**;248_A_0.912;249_V_1.000**;	[R] COG0724 RNA-binding proteins (RRM domain)	Atta cephalotes	NA
FEX_0004384-mRNA1	F3x4	PositiveSelection	-832.439599	0.00263	1.00000	0.00263	1.00000	0.00263	1.00000	999.00000	999.00000	100_F_0.971*;101_S_1.000**;102_F_0.830;103_E_0.997**;104_N_0.838;106_K_0.810;107_F_0.971*;108_H_0.856;109_V_0.863;110_E_0.999**;	Cytosolic carboxypeptidase 2-like protein	Lasius niger	GO:0004180|carboxypeptidase activity|IEA; GO:0004181|metallocarboxypeptidase activity|IEA; GO:0006508|proteolysis|IEA; GO:0008270|zinc ion binding|IEA
FEX_0010292-mRNA1	F3x4	PositiveSelection	-3517.959005	0.03995	1.00000	0.03995	1.00000	0.03995	1.00000	18.66515	18.66515	17_G_0.789;23_V_0.965*;57_V_0.562;	F-box only protein	Lasius niger	NA
FEX_0004209-mRNA1	F3x4	PositiveSelection	-716.728683	0.04472	1.00000	0.04472	1.00000	0.04472	1.00000	334.56576	334.56576	35_A_0.943;36_V_1.000**;37_E_1.000**;38_Q_0.997**;39_S_1.000**;40_L_1.000**;41_T_0.999**;42_L_0.998**;43_E_0.965*;44_C_1.000**;45_K_1.000**;46_C_1.000**;47_T_1.000**;48_C_1.000**;49_W_0.999**;50_R_0.634;51_G_1.000**;53_S_1.000**;54_G_1.000**;56_S_1.000**;57_A_0.999**;58_P_1.000**;59_P_0.983*;60_L_1.000**;61_Y_0.986*;64_D_1.000**;66_L_0.997**;68_Y_1.000**;69_T_0.998**;70_T_0.985*;71_K_1.000**;72_S…	Protein Wnt	Lasius niger	GO:0005102|receptor binding|IEA; GO:0005576|extracellular region|IEA; GO:0005578|proteinaceous extracellular matrix|IEA; GO:0007275|multicellular organismal development|IEA; GO:0016055|Wnt receptor signaling pathway|IEA
FEX_0013318-mRNA7	F3x4	PositiveSelection	-8753.500462	0.12385	1.00000	0.12385	1.00000	0.12385	1.00000	5.64705	5.64705	203_V_0.703;368_G_0.992**;456_D_0.797;499_K_0.951*;	Tudor domain-containing protein 7	Camponotus floridanus	NA
FEX_0003831-mRNA1	F3x4	PositiveSelection	-3197.600577	0.05290	1.00000	0.05290	1.00000	0.05290	1.00000	999.00000	999.00000	1_L_0.785;2_K_0.993**;3_F_0.987*;6_L_0.713;30_S_0.798;31_D_0.765;135_V_0.685;245_Q_0.804;276_V_0.657;292_F_0.809;334_V_0.657;345_A_0.999**;346_G_0.997**;347_K_0.945;348_T_0.995**;349_V_0.923;350_A_0.999**;351_I_0.671;352_V_0.996**;353_G_0.999**;354_T_0.920;355_S_0.999**;356_G_0.992**;	ATP-binding cassette sub-family B member 8, mitochondrial	Camponotus floridanus	GO:0000166|nucleotide binding|IEA; GO:0005524|ATP binding|IEA; GO:0006810|transport|IEA; GO:0008152|metabolic process|IEA; GO:0016020|membrane|IEA; GO:0016021|integral to membrane|IEA; GO:0016887|ATPase activity|IEA; GO:0042626|ATPase activity, coupled to transmembrane movement of substances|IEA; GO:0055085|transmembrane transport|IEA
FEX_0005345-mRNA1	F3x4	PositiveSelection	-1253.744022	0.04126	1.00000	0.04126	1.00000	0.04126	1.00000	234.44316	234.44316	127_T_0.568;128_E_1.000**;129_Q_1.000**;130_L_0.926;131_R_1.000**;132_L_0.928;133_S_0.857;134_V_0.993**;135_T_0.958*;136_V_0.981*;137_N_0.993**;138_D_1.000**;139_Y_1.000**;140_L_0.970*;141_D_0.998**;142_K_0.999**;143_L_0.999**;	Hemocyte protein-glutamine gamma-glutamyltransferase	Camponotus floridanus	GO:0003810|protein-glutamine gamma-glutamyltransferase activity|IEA; GO:0016740|transferase activity|IEA; GO:0018149|peptide cross-linking|IEA; GO:0046872|metal ion binding|IEA
FEX_0003119-mRNA1	F3x4	PositiveSelection	-5925.341294	0.07350	1.00000	0.07350	1.00000	0.07350	1.00000	115.37018	115.37018	1_R_0.782;2_I_0.614;3_F_0.811;5_E_1.000**;6_L_0.850;7_A_0.985*;8_A_0.997**;9_P_0.724;10_M_0.999**;11_F_0.997**;12_N_1.000**;13_F_0.996**;14_I_0.752;15_L_0.994**;16_N_0.995**;17_L_0.973*;18_W_0.973*;126_A_0.799;130_M_0.901;330_I_0.666;516_S_0.535;561_R_0.766;	Importin-11	Camponotus floridanus	GO:0005622|intracellular|IEA; GO:0006886|intracellular protein transport|IEA; GO:0008536|Ran GTPase binding|IEA
FEX_0012753-mRNA1	F3x4	PositiveSelection	-7244.529075	0.10089	1.00000	0.10089	1.00000	0.10089	1.00000	998.99993	998.99993	782_N_0.970*;783_S_0.937;785_M_0.993**;	pfam00566, RabGAP-TBC, Rab-GTPase-TBC domain	Camponotus floridanus	NA
FEX_0007433-mRNA1	F3x4	PositiveSelection	-6099.736953	0.01639	1.00000	0.01639	1.00000	0.01639	1.00000	176.39734	176.39734	206_G_0.951*;	Furin-like protease 2	Camponotus floridanus	GO:0004252|serine-type endopeptidase activity|IEA; GO:0006508|proteolysis|IEA; GO:0008233|peptidase activity|IEA; GO:0008236|serine-type peptidase activity|IEA; GO:0016020|membrane|IEA; GO:0016021|integral to membrane|IEA; GO:0016787|hydrolase activity|IEA
FEX_0004705-mRNA1	F3x4	PositiveSelection	-4758.045961	0.08823	1.00000	0.08823	1.00000	0.08823	1.00000	316.74759	316.74759	54_L_0.649;86_E_0.999**;88_E_0.998**;89_D_0.941;90_D_0.985*;91_V_0.863;100_I_0.599;	Unassigned protein	Camponotus floridanus	NA
FEX_0005793-mRNA2	F3x4	PositiveSelection	-2239.356285	0.05369	1.00000	0.05369	1.00000	0.05369	1.00000	21.23643	21.23643	11_S_0.991**;152_S_0.561;159_V_0.663;236_Q_0.613;239_V_0.988*;241_S_0.506;	Neuropeptides capa receptor	Camponotus floridanus	GO:0004871|signal transducer activity|IEA; GO:0004930|G-protein coupled receptor activity|IEA; GO:0007165|signal transduction|IEA; GO:0007186|G-protein coupled receptor signaling pathway|IEA; GO:0007218|neuropeptide signaling pathway|IEA; GO:0016020|membrane|IEA; GO:0016021|integral to membrane|IEA
FEX_0002559-mRNA2	F3x4	PositiveSelection	-5293.428125	0.09859	1.00000	0.09859	1.00000	0.09859	1.00000	90.89884	90.89884	30_G_0.691;145_S_0.533;150_P_0.548;279_E_0.669;369_T_0.574;517_G_0.684;518_K_0.999**;520_G_0.625;521_G_0.997**;523_S_0.989*;524_R_0.996**;526_D_0.985*;529_V_0.884;531_Y_0.991**;533_V_0.758;534_P_0.911;535_I_0.807;536_S_0.936;537_R_0.736;538_Q_0.633;539_P_0.992**;540_G_0.997**;541_A_0.928;	Wd repeat-containing protein 78-like protein	Lasius niger	NA
FEX_0002566-mRNA1	F3x4	PositiveSelection	-3304.947135	0.03956	1.00000	0.03956	1.00000	0.03956	1.00000	999.00000	999.00000	3_H_0.559;19_M_0.603;20_A_0.996**;111_E_0.779;219_E_0.524;289_V_0.590;332_R_0.660;341_G_0.965*;356_N_0.667;387_E_0.998**;388_K_0.999**;389_L_0.531;390_T_0.932;391_K_0.975*;	Aspartate aminotransferase	Lasius niger	GO:0003824|catalytic activity|IEA; GO:0004069|L-aspartate:2-oxoglutarate aminotransferase activity|IEA; GO:0006520|cellular amino acid metabolic process|IEA; GO:0008483|transaminase activity|IEA; GO:0009058|biosynthetic process|IEA; GO:0016740|transferase activity|IEA; GO:0030170|pyridoxal phosphate binding|IEA; GO:0080130|L-phenylalanine:2-oxoglutarate aminotransferase activity|IEA
FEX_0007780-mRNA1	F3x4	PositiveSelection	-2806.999033	0.05767	1.00000	0.05767	1.00000	0.05767	1.00000	4.16274	4.16274	7_K_0.603;22_D_0.516;100_A_0.989*;150_E_0.581;196_N_0.608;282_V_0.643;305_V_0.698;	THO complex subunit 6-like protein	Lasius niger	NA
FEX_0005091-mRNA1	F3x4	PositiveSelection	-2066.898488	0.01634	1.00000	0.01634	1.00000	0.01634	1.00000	79.07358	79.07358	1_D_1.000**;2_A_0.997**;3_A_0.997**;4_S_0.806;5_C_1.000**;6_Y_0.996**;7_S_0.997**;8_K_0.996**;10_I_1.000**;126_I_0.780;168_C_0.859;	Transporter (Fragment)	Vollenhovia emeryi	GO:0005328|neurotransmitter:sodium symporter activity|IEA; GO:0006810|transport|IEA; GO:0006836|neurotransmitter transport|IEA; GO:0015293|symporter activity|IEA; GO:0016020|membrane|IEA; GO:0016021|integral to membrane|IEA; GO:0055085|transmembrane transport|IEA
FEX_0005037-mRNA1	F3x4	PositiveSelection	-2922.999084	0.04294	1.00000	0.04294	1.00000	0.04294	1.00000	37.46993	37.46993	1_R_0.980*;2_A_0.918;3_A_0.998**;5_A_0.999**;7_D_0.866;8_L_0.996**;9_E_0.990**;11_E_0.999**;98_A_0.866;106_K_0.593;170_I_0.581;215_C_0.850;239_A_0.841;244_V_0.719;258_A_0.764;262_S_0.859;269_A_0.615;317_M_0.795;328_S_0.640;	Mitotic spindle assembly checkpoint protein MAD1	Camponotus floridanus	GO:0007094|mitotic cell cycle spindle assembly checkpoint|IEA
FEX_0005399-mRNA1	F3x4	PositiveSelection	-6178.071637	0.03936	1.00000	0.03936	1.00000	0.03936	1.00000	999.00000	999.00000	49_L_0.915;164_V_0.802;201_S_0.791;415_P_0.824;419_V_0.790;616_P_0.776;621_D_0.778;662_Q_0.997**;663_T_0.891;664_A_1.000**;665_N_0.923;666_D_0.864;668_T_1.000**;669_G_0.999**;670_M_1.000**;671_L_0.966*;673_K_0.888;674_I_0.993**;675_N_0.995**;676_A_0.990*;678_Q_1.000**;679_D_0.686;681_K_0.776;682_W_0.998**;683_L_1.000**;684_Q_0.921;685_A_0.913;686_Y_1.000**;687_W_0.997**;688_S_0.999**;689_D_0.990*…	N-acetyltransferase	Camponotus floridanus	GO:0008080|N-acetyltransferase activity|IEA; GO:0008152|metabolic process|IEA; GO:0016740|transferase activity|IEA
FEX_0004713-mRNA1	F3x4	PositiveSelection	-8483.135245	0.11774	1.00000	0.11774	1.00000	0.11774	1.00000	999.00000	999.00000	161_K_0.523;322_S_0.950*;370_P_0.689;373_N_0.755;520_S_0.794;559_E_0.928;607_P_0.923;619_R_0.847;620_V_0.918;621_P_0.564;622_R_0.852;636_T_0.748;	Unassigned protein	Camponotus floridanus	NA
FEX_0003128-mRNA1	F3x4	PositiveSelection	-8763.611839	0.15795	1.00000	0.15795	1.00000	0.15795	1.00000	476.78957	476.78957	595_P_0.549;689_Q_0.645;736_E_0.922;737_E_0.556;738_D_0.975*;739_V_0.657;740_T_0.625;742_R_0.563;743_T_0.609;744_E_0.591;745_D_0.901;746_R_0.817;747_K_0.972*;748_P_0.905;749_Q_0.951*;750_E_0.869;754_Q_0.631;757_E_0.913;758_Q_0.976*;759_Y_0.827;760_E_0.971*;761_L_0.572;763_I_0.860;764_E_0.958*;765_S_0.948;	UCH domain containing protein	Lasius niger	NA
FEX_0006778-mRNA1	F3x4	PositiveSelection	-520.995115	0.01195	1.00000	0.01195	1.00000	0.01195	1.00000	43.09083	43.09083	1_A_0.700;5_A_0.522;43_T_0.992**;	PREDICTED: protein TANC2 isoform X4	Megachile rotundata	NA
FEX_0007285-mRNA1	F3x4	PositiveSelection	-4017.776297	0.06550	1.00000	0.06550	1.00000	0.06550	1.00000	46.59196	46.59196	229_A_0.552;345_I_0.620;423_P_0.981*;424_E_0.967*;425_G_0.873;	SART-1 domain containing protein	Camponotus floridanus	NA
FEX_0009982-mRNA1	F3x4	PositiveSelection	-3576.224498	0.05569	1.00000	0.05569	1.00000	0.05569	1.00000	1.32517	1.32517	28_G_0.706;121_S_0.773;123_D_0.694;124_L_0.679;163_R_0.703;210_Q_0.671;233_D_0.698;239_R_0.699;248_L_0.654;279_K_0.703;319_T_0.699;331_S_0.691;352_H_0.702;359_E_0.960*;404_M_0.681;	Grip and coiled-coil domain-containing protein 1-like protein	Lasius niger	GO:0000042|protein targeting to Golgi|IEA; GO:0005737|cytoplasm|IEA; GO:0016788|hydrolase activity, acting on ester bonds|IEA; GO:0019478|D-amino acid catabolic process|IEA
FEX_0002701-mRNA1	F3x4	PositiveSelection	-11209.511187	0.05382	1.00000	0.05382	1.00000	0.05382	1.00000	998.99998	998.99998	42_R_0.507;50_S_0.512;54_D_0.705;96_R_0.563;119_T_0.809;130_P_0.815;131_D_0.831;138_V_0.829;245_A_0.655;485_H_0.720;797_V_0.697;883_D_0.689;916_E_0.696;931_S_0.648;980_S_0.653;1103_E_0.612;1140_H_0.980*;1141_K_0.610;1142_K_0.990*;1143_R_0.535;1145_D_0.696;1146_H_0.892;1148_R_0.691;1150_E_0.805;1152_K_0.845;1153_H_0.999**;1154_D_0.544;1155_R_0.727;1156_H_0.990**;1157_R_0.763;1158_S_0.990*;1159_P_0…	Round spermatid basic protein 1-like protein	Lasius niger	GO:0005634|nucleus|IEA
FEX_0000509-mRNA1	F3x4	PositiveSelection	-12604.464142	0.02147	1.00000	0.02147	1.00000	0.02147	1.00000	1.12784	1.12784	3_P_0.847;4_D_0.695;5_P_0.936;7_A_0.528;9_A_0.930;14_N_0.566;15_E_0.873;18_N_0.578;20_T_0.748;21_R_0.940;23_A_0.794;24_D_0.573;26_A_0.947;30_L_0.589;32_P_0.936;33_T_0.783;34_A_0.804;35_I_0.875;36_V_0.697;38_L_0.947;40_P_0.859;41_S_0.866;43_D_0.856;44_G_0.738;46_L_0.501;50_I_0.603;51_R_0.866;57_H_0.713;61_S_0.975*;67_W_0.887;69_R_0.528;77_H_0.915;79_H_0.857;80_G_0.715;84_L_0.941;85_R_0.780;86_I_0.…	Protein toll	Lasius niger	GO:0007165|signal transduction|IEA; GO:0016020|membrane|IEA; GO:0016021|integral to membrane|IEA
FEX_0007267-mRNA1	F3x4	PositiveSelection	-9149.172563	0.04264	1.00000	0.04264	1.00000	0.04264	1.00000	4.40983	4.40983	19_A_0.963*;61_D_0.715;158_P_0.692;239_V_0.675;263_P_0.685;361_D_0.671;683_P_0.685;702_T_0.719;709_N_0.673;735_V_0.670;750_N_0.973*;760_P_0.700;843_A_0.684;856_S_0.702;892_S_0.684;958_D_0.673;966_Q_0.675;978_Y_0.705;1018_D_0.679;1100_M_0.523;1117_N_0.713;	LIM domain kinase 1	Lasius niger	GO:0004623|phospholipase A2 activity|IEA; GO:0004672|protein kinase activity|IEA; GO:0005524|ATP binding|IEA; GO:0005576|extracellular region|IEA; GO:0006468|protein phosphorylation|IEA; GO:0006644|phospholipid metabolic process|IEA; GO:0008270|zinc ion binding|IEA; GO:0016042|lipid catabolic process|IEA; GO:0016301|kinase activity|IEA; GO:0016310|phosphorylation|IEA; GO:0046872|metal ion binding…
FEX_0011639-mRNA1	F3x4	PositiveSelection	-9240.721004	0.02010	1.00000	0.02010	1.00000	0.02010	1.00000	489.26752	489.26752	114_D_0.591;266_A_0.685;619_S_0.651;715_P_0.707;790_P_0.723;931_E_0.723;932_R_0.935;933_P_1.000**;934_D_0.915;935_R_0.999**;936_F_1.000**;937_L_0.998**;938_Y_0.997**;940_S_0.926;941_Q_0.645;942_E_1.000**;943_Q_0.999**;944_F_0.998**;945_S_0.993**;946_I_0.684;948_L_0.988*;949_F_0.669;950_K_0.996**;951_I_0.959*;953_L_0.999**;955_Q_0.999**;956_W_0.985*;958_L_0.927;959_K_0.861;960_S_0.817;961_L_0.999*…	Cleavage and polyadenylation specificity factor subunit	Camponotus floridanus	GO:0003676|nucleic acid binding|IEA; GO:0005509|calcium ion binding|IEA; GO:0005634|nucleus|IEA
FEX_0008054-mRNA1	F3x4	PositiveSelection	-1449.224023	0.03448	1.00000	0.03448	1.00000	0.03448	1.00000	4.03719	4.03719	1_L_0.861;5_C_0.910;8_T_0.871;10_P_0.921;46_I_0.785;66_T_0.668;72_N_0.678;73_A_0.783;84_G_0.996**;100_H_0.870;107_T_0.918;111_Y_0.875;125_H_0.894;135_A_0.956*;143_Q_0.911;146_A_0.865;156_H_0.914;	C3 and PZP-like alpha-2-macroglobulin domain-containing protein 8	Camponotus floridanus	NA
FEX_0008134-mRNA1	F3x4	PositiveSelection	-2873.169011	0.03468	1.00000	0.03468	1.00000	0.03468	1.00000	77.48402	77.48402	41_V_0.761;140_I_0.726;197_V_0.550;203_Q_0.560;242_K_0.999**;243_S_0.902;244_C_0.983*;245_S_0.882;247_L_0.810;248_N_0.772;249_D_0.787;250_L_0.995**;251_N_0.999**;252_R_0.999**;254_N_0.999**;255_V_0.804;256_D_0.992**;257_K_0.682;258_S_0.759;259_K_0.748;260_P_0.752;261_L_0.809;262_R_0.986*;264_C_0.968*;266_S_0.995**;267_P_0.983*;269_D_0.945;271_R_0.993**;275_W_0.637;276_N_0.993**;277_K_0.847;280_N_…	Brain-enriched guanylate kinase-associated protein	Lasius niger	GO:0016301|kinase activity|IEA; GO:0016310|phosphorylation|IEA
FEX_0012251-mRNA1	F3x4	PositiveSelection	-5789.222743	0.05434	1.00000	0.05434	1.00000	0.05434	1.00000	270.07670	270.07670	78_P_0.595;98_P_0.588;145_Q_0.639;198_I_0.573;571_C_0.697;572_G_0.987*;573_Y_0.990*;574_M_0.734;575_Q_0.995**;576_P_0.994**;577_R_0.951*;582_R_0.898;583_V_0.599;584_T_0.585;586_Y_0.986*;589_E_0.954*;591_E_0.997**;592_K_0.993**;596_D_0.926;598_K_0.917;600_Y_0.899;601_G_0.585;602_S_0.544;	Tyrosine-protein kinase receptor	Lasius niger	GO:0000166|nucleotide binding|IEA; GO:0004672|protein kinase activity|IEA; GO:0004713|protein tyrosine kinase activity|IEA; GO:0004714|transmembrane receptor protein tyrosine kinase activity|IEA; GO:0005524|ATP binding|IEA; GO:0006468|protein phosphorylation|IEA; GO:0007169|transmembrane receptor protein tyrosine kinase signaling pathway|IEA; GO:0016020|membrane|IEA; GO:0016021|integral to membra…
FEX_0010889-mRNA1	F3x4	PositiveSelection	-3810.413590	0.02681	1.00000	0.02681	1.00000	0.02681	1.00000	17.89412	17.89412	73_P_0.507;208_I_0.969*;	Seryl-tRNA synthetase, cytoplasmic	Camponotus floridanus	GO:0000166|nucleotide binding|IEA; GO:0004812|aminoacyl-tRNA ligase activity|IEA; GO:0004828|serine-tRNA ligase activity|IEA; GO:0005524|ATP binding|IEA; GO:0005737|cytoplasm|IEA; GO:0006418|tRNA aminoacylation for protein translation|IEA; GO:0006434|seryl-tRNA aminoacylation|IEA
FEX_0010441-mRNA1	F3x4	PositiveSelection	-1640.405959	0.04924	1.00000	0.04924	1.00000	0.04924	1.00000	4.16251	4.16251	6_S_0.839;42_L_0.849;48_D_0.801;65_V_0.655;66_S_0.710;70_V_0.859;71_H_0.819;92_P_0.590;104_D_0.743;110_M_0.817;113_A_0.841;128_N_0.711;129_A_0.867;139_D_0.982*;142_S_0.997**;144_E_0.807;154_Y_0.855;170_I_0.884;171_L_0.869;184_G_0.621;202_P_0.829;	Regulator of nonsense transcripts 2	Camponotus floridanus	GO:0003723|RNA binding|IEA
FEX_0010894-mRNA2	F3x4	PositiveSelection	-15248.287897	0.04584	1.00000	0.04584	1.00000	0.04584	1.00000	299.87578	299.87578	2_S_0.543;3_K_0.969*;7_D_0.942;8_T_0.974*;10_Y_0.542;11_T_0.804;41_P_0.510;87_R_0.521;100_P_0.525;428_S_0.576;838_P_0.528;1050_P_0.514;1460_A_0.506;1506_H_0.507;	Histone-lysine N-methyltransferase trithorax (Fragment)	Camponotus floridanus	GO:0003700|sequence-specific DNA binding transcription factor activity|IEA; GO:0005634|nucleus|IEA; GO:0006355|regulation of transcription, DNA-dependent|IEA; GO:0008168|methyltransferase activity|IEA; GO:0008270|zinc ion binding|IEA; GO:0016740|transferase activity|IEA; GO:0032259|methylation|IEA; GO:0043565|sequence-specific DNA binding|IEA; GO:0046872|metal ion binding|IEA
FEX_0011644-mRNA2	F3x4	PositiveSelection	-2439.077245	0.01526	1.00000	0.01526	1.00000	0.01526	1.00000	76.90717	76.90717	20_G_0.596;32_G_0.591;51_T_0.815;65_I_0.620;299_N_0.582;300_A_0.999**;301_N_0.548;302_P_0.967*;303_V_0.911;304_L_0.736;305_W_0.806;306_A_0.998**;307_V_0.764;309_A_0.993**;310_A_0.616;312_T_0.992**;313_K_0.910;	UPF0364 protein C6orf211-like protein	Camponotus floridanus	NA
FEX_0000117-mRNA1	F3x4	PositiveSelection	-897.927562	0.03232	1.00000	0.03232	1.00000	0.03232	1.00000	7.43828	7.43828	38_T_0.985*;70_P_0.666;72_V_0.622;	DUF383 multi-domain protein	Camponotus floridanus	NA
FEX_0004173-mRNA1	F3x4	PositiveSelection	-330.967700	0.05999	1.00000	0.05999	1.00000	0.05999	1.00000	139.30637	139.30637	2_S_0.996**;3_Y_0.867;4_D_0.994**;5_C_0.660;6_P_0.996**;7_K_1.000**;8_G_0.997**;9_Y_0.581;	Putative atp-dependent rna helicase dbp73d-like protein	Lasius niger	GO:0003676|nucleic acid binding|IEA; GO:0004386|helicase activity|IEA; GO:0005524|ATP binding|IEA; GO:0008152|metabolic process|IEA; GO:0016787|hydrolase activity|IEA
FEX_0007283-mRNA1	F3x4	PositiveSelection	-883.622794	0.04192	1.00000	0.04192	1.00000	0.04192	1.00000	15.45054	15.45054	11_E_0.546;82_V_0.992**;87_A_0.592;	Fanconi anemia group J protein	Camponotus floridanus	GO:0000166|nucleotide binding|IEA; GO:0003676|nucleic acid binding|IEA; GO:0003677|DNA binding|IEA; GO:0004003|ATP-dependent DNA helicase activity|IEA; GO:0004386|helicase activity|IEA; GO:0005524|ATP binding|IEA; GO:0005634|nucleus|IEA; GO:0006139|nucleobase-containing compound metabolic process|IEA; GO:0008026|ATP-dependent helicase activity|IEA; GO:0016787|hydrolase activity|IEA; GO:0016818|hy…
FEX_0007266-mRNA1	F3x4	PositiveSelection	-1473.343887	0.01545	1.00000	0.01545	1.00000	0.01545	1.00000	15.51643	15.51643	83_G_0.973*;	Cell division control protein 2-like protein	Lasius niger	GO:0000166|nucleotide binding|IEA; GO:0004672|protein kinase activity|IEA; GO:0005524|ATP binding|IEA; GO:0006468|protein phosphorylation|IEA; GO:0051301|cell division|IEA
FEX_0010420-mRNA1	F3x4	PositiveSelection	-4403.936194	0.07865	1.00000	0.07865	1.00000	0.07865	1.00000	34.55030	34.55030	2_T_0.778;3_D_0.995**;4_A_0.971*;105_L_0.579;120_T_0.554;146_L_0.973*;168_S_0.981*;178_H_0.563;195_R_0.941;197_M_0.675;209_V_0.651;251_E_0.580;337_Q_0.537;	Wd repeat-containing protein 18-like protein	Lasius niger	NA
FEX_0012812-mRNA5	F3x4	PositiveSelection	-13732.282774	0.00852	1.00000	0.00852	1.00000	0.00852	1.00000	998.99999	998.99999	28_P_0.572;293_L_0.531;388_L_0.554;591_R_0.553;676_G_0.523;1197_N_0.638;1885_L_0.743;1886_R_0.647;1888_N_0.691;1889_R_0.994**;1890_R_0.997**;1891_T_0.998**;1892_Y_0.680;1894_F_0.997**;1896_A_0.651;1897_A_0.993**;1899_A_0.981*;1900_E_0.672;1902_V_0.989*;1903_Q_0.663;1904_A_0.991**;1905_C_0.995**;	Myotubularin-related protein 13	Camponotus floridanus	GO:0005622|intracellular|IEA; GO:0035556|intracellular signal transduction|IEA; GO:0046872|metal ion binding|IEA
FEX_0004138-mRNA2	F3x4	PositiveSelection	-367.285203	0.03559	1.00000	0.03559	1.00000	0.03559	1.00000	999.00000	999.00000	1_M_0.525;2_N_0.525;3_Q_0.525;4_C_0.525;5_Y_0.525;6_G_0.525;7_N_0.525;8_C_0.525;9_E_0.586;10_D_0.525;11_D_0.525;12_G_0.525;13_K_0.525;14_G_0.525;15_R_0.526;16_Q_0.525;17_M_0.525;18_P_0.525;19_V_0.525;20_H_0.525;21_Y_0.525;22_G_0.525;23_S_0.525;24_K_0.525;25_E_0.525;26_F_0.525;27_N_0.525;28_F_0.525;29_T_0.525;30_T_0.969*;31_I_0.525;32_S_0.525;33_S_0.525;34_P_0.525;35_L_0.525;36_T_0.525;37_T_0.525;…	2-oxoisovalerate dehydrogenase subunit alpha, mitochondrial	Pogonomyrmex barbatus	GO:0008152|metabolic process|IEA; GO:0016624|oxidoreductase activity, acting on the aldehyde or oxo group of donors, disulfide as acceptor|IEA; GO:0055114|oxidation-reduction process|IEA
FEX_0010456-mRNA1	F3x4	PositiveSelection	-2734.205111	0.04435	1.00000	0.04435	1.00000	0.04435	1.00000	998.99947	998.99947	61_T_0.529;349_I_0.522;350_R_0.990**;351_I_0.940;	Serine/threonine-protein kinase VRK1	Camponotus floridanus	GO:0000166|nucleotide binding|IEA; GO:0004672|protein kinase activity|IEA; GO:0004674|protein serine/threonine kinase activity|IEA; GO:0005524|ATP binding|IEA; GO:0006468|protein phosphorylation|IEA; GO:0016301|kinase activity|IEA; GO:0016310|phosphorylation|IEA
FEX_0006463-mRNA1	F3x4	PositiveSelection	-2228.285035	0.06448	1.00000	0.06448	1.00000	0.06448	1.00000	9.82236	9.82236	21_Y_0.528;216_V_0.548;240_N_0.969*;	Voltage-dependent anion-selective channel-like protein	Lasius niger	GO:0005739|mitochondrion|IEA; GO:0005741|mitochondrial outer membrane|IEA; GO:0006820|anion transport|IEA; GO:0008308|voltage-gated anion channel activity|IEA; GO:0016021|integral to membrane|IEA; GO:0044070|regulation of anion transport|IEA; GO:0055085|transmembrane transport|IEA; GO:1903959||IEA
FEX_0001225-mRNA1	F3x4	PositiveSelection	-7917.809576	0.11928	1.00000	0.11928	1.00000	0.11928	1.00000	822.21174	822.21174	132_E_0.706;182_A_0.959*;297_S_0.903;361_T_0.620;598_K_0.588;	U3 small nucleolar rna-associated protein 14-like protein a protein	Lasius niger	GO:0006364|rRNA processing|IEA; GO:0032040|small-subunit processome|IEA
FEX_0011781-mRNA1	F3x4	PositiveSelection	-5021.434356	0.02874	1.00000	0.02874	1.00000	0.02874	1.00000	998.99996	998.99996	2_H_0.997**;3_D_1.000**;96_Q_0.552;326_P_0.555;644_V_0.994**;645_L_0.685;646_L_0.997**;647_T_0.997**;648_S_0.995**;649_D_0.995**;651_E_0.556;653_E_0.999**;654_K_1.000**;657_T_0.565;658_I_0.697;659_A_0.999**;660_R_0.888;	GTPase-activating Rap/Ran-GAP domain-like protein 3	Wasmannia auropunctata	GO:0005096|GTPase activator activity|IEA; GO:0043547|positive regulation of GTPase activity|IEA; GO:0051056|regulation of small GTPase mediated signal transduction|IEA
FEX_0002808-mRNA1	F3x4	PositiveSelection	-6008.645866	0.08931	1.00000	0.08931	1.00000	0.08931	1.00000	50.99687	50.99687	104_S_0.684;105_N_0.565;170_Q_0.917;171_K_0.974*;336_S_0.540;442_A_0.605;	DEAD-box ATP-dependent RNA helicase	Camponotus floridanus	GO:0000166|nucleotide binding|IEA; GO:0003676|nucleic acid binding|IEA; GO:0003723|RNA binding|IEA; GO:0004386|helicase activity|IEA; GO:0005524|ATP binding|IEA; GO:0008152|metabolic process|IEA; GO:0016787|hydrolase activity|IEA
FEX_0011822-mRNA1	F3x4	PositiveSelection	-9749.856735	0.08574	1.00000	0.08574	1.00000	0.08574	1.00000	51.43525	51.43525	1_A_0.937;3_R_0.999**;4_Y_0.949;6_A_0.650;7_V_0.945;10_I_0.793;14_Y_0.941;16_G_0.997**;17_S_0.723;19_R_0.979*;20_K_0.924;32_L_0.513;166_Q_0.518;331_E_0.678;404_D_0.955*;406_Q_0.521;410_K_0.964*;412_F_0.927;474_P_0.554;	UPF0486 protein C1orf59-like protein	Camponotus floridanus	GO:0001510|RNA methylation|IEA; GO:0008171|O-methyltransferase activity|IEA; GO:0008173|RNA methyltransferase activity|IEA
FEX_0013303-mRNA1	F3x4	PositiveSelection	-4201.339135	0.05353	1.00000	0.05353	1.00000	0.05353	1.00000	4.33814	4.33814	10_Q_0.776;20_N_0.719;21_N_0.997**;23_V_0.773;33_C_0.816;45_E_0.680;46_V_0.623;70_R_0.730;77_N_0.703;78_C_0.751;90_M_0.544;103_T_0.937;110_A_0.677;129_L_0.976*;130_H_0.530;133_K_0.694;134_P_0.729;138_T_0.617;143_E_0.789;175_P_0.734;177_R_0.711;203_Q_0.768;236_K_0.694;270_V_0.706;291_N_0.717;473_K_0.706;	Nucleolar complex protein 4-like protein B	Camponotus floridanus	GO:0042254|ribosome biogenesis|IEA
FEX_0010676-mRNA1	F3x4	PositiveSelection	-773.631831	0.12176	1.00000	0.12176	1.00000	0.12176	1.00000	29.87522	29.87522	41_C_0.987*;44_D_0.708;59_I_0.500;65_I_0.708;72_V_0.995**;	PREDICTED: beta-1,3-galactosyltransferase 5	Camponotus floridanus	NA
FEX_0007476-mRNA1	F3x4	PositiveSelection	-6655.583104	0.02970	1.00000	0.02970	1.00000	0.02970	1.00000	1.26968	1.26968	48_A_0.552;298_P_0.554;301_E_0.515;304_D_0.951*;318_D_0.520;529_I_0.523;620_A_0.514;632_A_0.534;694_Q_0.595;717_E_0.529;768_D_0.520;	Endoplasmin	Lasius niger	GO:0005524|ATP binding|IEA; GO:0006457|protein folding|IEA; GO:0006950|response to stress|IEA; GO:0051082|unfolded protein binding|IEA
FEX_0004823-mRNA1	F3x4	PositiveSelection	-2312.698470	0.01478	1.00000	0.01478	1.00000	0.01478	1.00000	39.36040	39.36040	7_S_0.956*;8_D_0.999**;9_D_1.000**;10_S_0.998**;11_V_0.998**;13_V_0.999**;37_A_0.686;44_F_0.566;77_N_0.507;87_L_0.745;102_Q_0.789;103_R_0.941;105_S_0.902;106_N_0.999**;107_R_0.986*;108_V_0.580;158_R_0.578;204_A_0.788;	Protein DDI1 2-like protein	Camponotus floridanus	GO:0004190|aspartic-type endopeptidase activity|IEA; GO:0006508|proteolysis|IEA; GO:0016020|membrane|IEA; GO:0016021|integral to membrane|IEA
FEX_0000091-mRNA1	F3x4	PositiveSelection	-1374.758949	0.02884	1.00000	0.02884	1.00000	0.02884	1.00000	999.00000	999.00000	3_M_1.000**;4_E_0.998**;	H/ACA ribonucleoprotein complex subunit 2-like protein	Camponotus floridanus	GO:0019013|viral nucleocapsid|IEA; GO:0030529|ribonucleoprotein complex|IEA
FEX_0011553-mRNA1	F3x4	PositiveSelection	-1205.825141	0.03631	1.00000	0.03631	1.00000	0.03631	1.00000	9.75882	9.75882	50_A_0.970*;116_K_0.675;117_E_0.802;	Mitochondrial import inner membrane translocase subunit Tim16	Lasius niger	GO:0005744|mitochondrial inner membrane presequence translocase complex|IEA; GO:0030150|protein import into mitochondrial matrix|IEA
FEX_0011549-mRNA1	F3x4	PositiveSelection	-170.055879	0.00000	1.00000	0.00000	1.00000	0.00000	1.00000	999.00000	999.00000	1_T_0.538;2_G_0.568;3_H_0.554;4_I_0.632;5_R_0.576;6_I_0.515;7_H_0.559;8_T_0.550;9_G_0.553;10_E_1.000**;11_R_1.000**;12_P_0.999**;13_F_0.578;14_K_1.000**;15_C_1.000**;	Zinc finger protein 273	Lasius niger	GO:0003676|nucleic acid binding|IEA; GO:0046872|metal ion binding|IEA
FEX_0001182-mRNA1	F3x4	PositiveSelection	-5730.960328	0.01400	1.00000	0.01400	1.00000	0.01400	1.00000	1.17307	1.17307	57_V_0.500;63_N_0.527;134_E_0.975*;158_K_0.577;320_G_0.601;330_T_0.581;333_S_0.524;363_P_0.533;416_A_0.527;533_V_0.530;594_M_0.537;606_M_0.699;	Aconitate hydratase, mitochondrial	Camponotus floridanus	GO:0003994|aconitate hydratase activity|IEA; GO:0005739|mitochondrion|IEA; GO:0006099|tricarboxylic acid cycle|IEA; GO:0008152|metabolic process|IEA; GO:0016829|lyase activity|IEA; GO:0046872|metal ion binding|IEA; GO:0051536|iron-sulfur cluster binding|IEA; GO:0051539|4 iron, 4 sulfur cluster binding|IEA
FEX_0003819-mRNA1	F3x4	PositiveSelection	-5676.904215	0.08437	1.00000	0.08437	1.00000	0.08437	1.00000	158.43298	158.43298	1_N_0.987*;2_A_0.599;3_E_0.868;4_S_0.739;6_S_0.949;9_A_0.935;11_R_0.769;12_L_0.933;13_L_0.879;14_D_0.992**;15_E_0.976*;16_D_0.999**;17_E_0.979*;19_M_0.790;20_E_0.982*;21_K_0.558;22_S_0.976*;23_A_0.722;24_V_0.684;26_I_0.863;30_Q_0.815;67_T_0.633;68_T_0.764;69_R_0.976*;70_D_0.835;71_N_0.699;170_V_0.613;224_V_0.541;324_D_0.678;332_L_0.695;389_R_0.581;393_N_0.775;508_M_0.545;	Leucine-rich repeat-containing protein	Lasius niger	GO:0016020|membrane|IEA; GO:0016021|integral to membrane|IEA
FEX_0004361-mRNA2	F3x4	PositiveSelection	-1027.948443	0.04423	1.00000	0.04423	1.00000	0.04423	1.00000	998.99907	998.99907	52_S_0.780;121_S_0.553;122_S_0.997**;	TIP41-like protein	Camponotus floridanus	NA
FEX_0003843-mRNA1	F3x4	PositiveSelection	-2092.263141	0.13630	1.00000	0.13630	1.00000	0.13630	1.00000	16.61973	16.61973	70_T_0.722;71_N_0.635;87_S_0.718;89_V_0.717;96_A_0.969*;100_P_0.557;120_K_0.724;145_E_0.650;172_T_0.897;192_L_0.541;	Anamorsin homolog	Camponotus floridanus	GO:0005737|cytoplasm|IEA; GO:0005739|mitochondrion|IEA; GO:0005758|mitochondrial intermembrane space|IEA; GO:0006915|apoptotic process|IEA; GO:0009055|electron carrier activity|IEA; GO:0016226|iron-sulfur cluster assembly|IEA; GO:0043066|negative regulation of apoptotic process|IEA; GO:0046872|metal ion binding|IEA; GO:0051536|iron-sulfur cluster binding|IEA; GO:0051537|2 iron, 2 sulfur cluster b…
FEX_0004386-mRNA1	F3x4	PositiveSelection	-3403.091981	0.01610	1.00000	0.01610	1.00000	0.01610	1.00000	287.39496	287.39496	442_R_0.600;443_K_0.990**;445_K_1.000**;446_S_0.583;448_S_0.999**;449_P_0.996**;450_D_0.980*;452_K_0.999**;453_E_0.692;455_L_0.505;456_A_0.991**;460_V_0.760;	Coronin	Lasius niger	NA
FEX_0004334-mRNA5	F3x4	PositiveSelection	-2325.539717	0.01076	1.00000	0.01076	1.00000	0.01076	1.00000	10.08488	10.08488	64_G_0.953*;77_T_0.582;	PREDICTED: F-box/WD repeat-containing protein 7	Camponotus floridanus	NA
FEX_0003836-mRNA1	F3x4	PositiveSelection	-2854.113153	0.05812	1.00000	0.05812	1.00000	0.05812	1.00000	999.00000	999.00000	2_V_0.999**;3_S_0.716;4_T_0.878;5_A_0.749;6_A_0.977*;7_S_0.682;8_T_0.752;90_P_0.597;156_V_0.613;	Intersectin-1	Pogonomyrmex barbatus	GO:0005089|Rho guanyl-nucleotide exchange factor activity|IEA; GO:0005509|calcium ion binding|IEA; GO:0035023|regulation of Rho protein signal transduction|IEA; GO:0043547|positive regulation of GTPase activity|IEA
FEX_0003733-mRNA1	F3x4	PositiveSelection	-10431.203593	0.15672	1.00000	0.15672	1.00000	0.15672	1.00000	10.62002	10.62002	3_L_0.693;4_L_0.870;5_L_0.967*;6_K_0.981*;27_D_0.639;109_A_0.726;131_V_0.696;154_A_0.714;164_V_0.572;179_R_0.673;189_D_0.667;193_V_0.704;275_A_0.712;288_E_0.625;300_S_0.571;318_A_0.537;329_V_0.717;350_A_0.553;367_N_0.546;389_D_0.537;417_A_0.727;444_A_0.581;481_L_0.666;484_E_0.968*;486_S_0.714;499_I_0.539;504_P_0.723;508_D_0.552;520_I_0.595;526_E_0.783;532_M_0.660;557_A_0.580;563_T_0.721;638_K_0.5…	SMC_N multi-domain protein	Camponotus floridanus	NA
FEX_0003768-mRNA2	F3x4	PositiveSelection	-15151.804187	0.03443	1.00000	0.03443	1.00000	0.03443	1.00000	87.80888	87.80888	196_S_0.503;390_G_0.516;428_A_0.509;487_K_0.507;576_A_0.532;577_K_0.976*;578_S_0.946;1637_P_0.509;1923_M_0.510;	Large proline-rich protein bat2	Lasius niger	NA
FEX_0004369-mRNA1	F3x4	PositiveSelection	-2730.243449	0.08133	1.00000	0.08133	1.00000	0.08133	1.00000	11.44792	11.44792	78_P_0.646;102_K_0.643;204_Y_0.672;225_R_0.959*;	Tetratricopeptide repeat protein 37	Camponotus floridanus	NA
FEX_0003817-mRNA1	F3x4	PositiveSelection	-3723.991186	0.04976	1.00000	0.04976	1.00000	0.04976	1.00000	1.78633	1.78633	1_E_0.988*;2_N_0.935;3_N_0.988*;4_Y_0.731;5_I_0.750;6_L_0.732;7_M_0.598;41_K_0.722;74_E_0.681;126_S_0.740;173_S_0.738;182_D_0.760;244_L_0.535;251_L_0.737;293_I_0.578;313_K_0.653;316_M_0.693;351_V_0.691;369_G_0.755;379_D_0.684;382_D_0.724;	Zinc finger protein 710	Camponotus floridanus	GO:0046872|metal ion binding|IEA
FEX_0002547-mRNA1	F3x4	PositiveSelection	-1916.835025	0.09961	1.00000	0.09961	1.00000	0.09961	1.00000	999.00000	999.00000	28_T_0.591;30_R_0.686;64_A_0.669;70_R_0.786;83_R_0.768;84_P_0.685;113_A_0.501;188_I_0.922;189_E_0.994**;190_E_0.997**;191_D_0.993**;192_M_1.000**;193_H_0.959*;194_L_0.944;196_D_0.997**;197_W_0.995**;198_S_0.597;199_D_0.998**;200_T_0.848;	Iq and ubiquitin-like domain-containing protein	Lasius niger	NA
FEX_0007549-mRNA1	F3x4	PositiveSelection	-5033.786830	0.06454	1.00000	0.06454	1.00000	0.06454	1.00000	87.76550	87.76550	2_R_0.660;5_G_0.720;177_E_0.590;202_A_0.646;213_E_0.579;281_S_0.839;347_R_0.747;418_M_0.625;421_S_0.987*;422_K_0.523;423_E_0.906;424_K_0.985*;425_S_0.746;430_T_0.963*;431_A_0.980*;438_N_0.520;	Transmembrane protein 77	Camponotus floridanus	GO:0016020|membrane|IEA; GO:0016021|integral to membrane|IEA
FEX_0010930-mRNA1	F3x4	PositiveSelection	-4698.754957	0.01889	1.00000	0.01889	1.00000	0.01889	1.00000	3.89073	3.89073	345_S_0.957*;	Sly1 protein-like protein	Lasius niger	GO:0005623|cell|IEA; GO:0006904|vesicle docking involved in exocytosis|IEA; GO:0016192|vesicle-mediated transport|IEA
FEX_0001963-mRNA2	F3x4	PositiveSelection	-1354.890942	0.03620	1.00000	0.03620	1.00000	0.03620	1.00000	2.92786	2.92786	35_G_0.721;41_H_0.541;60_E_0.528;102_M_0.526;137_R_0.984*;138_A_0.645;139_Y_0.768;140_N_0.984*;	PDZ domain-containing protein 2	Camponotus floridanus	NA
FEX_0001690-mRNA1	F3x4	PositiveSelection	-2486.343614	0.01813	1.00000	0.01813	1.00000	0.01813	1.00000	16.00185	16.00185	14_R_0.675;107_P_0.806;109_D_0.992**;110_H_0.714;115_V_0.674;148_V_0.589;275_D_0.570;281_A_0.585;294_P_0.750;297_K_0.696;299_R_0.820;	Protein kinase C	Camponotus floridanus	GO:0000166|nucleotide binding|IEA; GO:0004672|protein kinase activity|IEA; GO:0004674|protein serine/threonine kinase activity|IEA; GO:0004697|protein kinase C activity|IEA; GO:0005524|ATP binding|IEA; GO:0005622|intracellular|IEA; GO:0006468|protein phosphorylation|IEA; GO:0016301|kinase activity|IEA; GO:0016310|phosphorylation|IEA; GO:0016740|transferase activity|IEA; GO:0035556|intracellular s…
FEX_0010879-mRNA1	F3x4	PositiveSelection	-3822.201168	0.14056	1.00000	0.14056	1.00000	0.14056	1.00000	9.05567	9.05567	1_M_0.851;16_D_0.546;25_I_0.769;34_T_0.830;55_K_0.831;57_T_0.636;99_K_0.537;100_M_0.871;113_A_0.767;115_I_0.764;117_T_0.935;122_L_0.557;137_R_0.606;139_L_0.504;141_M_0.655;143_Q_0.818;161_K_0.974*;165_I_0.858;169_N_0.596;212_S_0.718;218_I_0.855;224_E_0.702;227_T_0.674;238_N_0.729;240_L_0.561;244_Y_0.572;255_S_0.549;265_A_0.824;274_N_0.989*;275_M_0.514;276_D_0.784;278_N_0.778;279_W_0.808;288_K_0.9…	Myosin_tail_1 multi-domain protein	Camponotus floridanus	NA
FEX_0001920-mRNA1	F3x4	PositiveSelection	-2963.289074	0.02604	1.00000	0.02604	1.00000	0.02604	1.00000	15.68193	15.68193	169_N_0.571;172_E_0.552;212_Q_0.983*;244_S_0.655;307_A_0.642;	DnaJ-like protein subfamily C member 2	Camponotus floridanus	GO:0003677|DNA binding|IEA; GO:0005634|nucleus|IEA
FEX_0006605-mRNA1	F3x4	PositiveSelection	-8902.931130	0.08425	1.00000	0.08425	1.00000	0.08425	1.00000	118.97292	118.97292	1_A_0.599;3_V_0.589;62_V_0.563;310_D_0.981*;311_R_0.985*;349_S_0.584;397_R_0.591;429_H_0.614;453_H_0.613;463_S_0.597;521_V_0.658;566_R_0.602;567_E_0.569;699_A_0.611;748_I_0.627;932_L_0.572;	RNA exonuclease 1-like protein	Camponotus floridanus	GO:0003676|nucleic acid binding|IEA; GO:0004527|exonuclease activity|IEA; GO:0046872|metal ion binding|IEA; GO:0090305|nucleic acid phosphodiester bond hydrolysis|IEA
FEX_0010901-mRNA1	F3x4	PositiveSelection	-1005.120442	0.06315	1.00000	0.06315	1.00000	0.06315	1.00000	178.36858	178.36858	1_M_0.634;2_Y_0.947;3_P_0.863;4_E_0.671;5_F_0.981*;6_L_0.934;7_P_0.871;8_D_0.634;82_V_0.672;91_Y_0.868;	39s ribosomal protein mitochondrial	Camponotus floridanus	GO:0003735|structural constituent of ribosome|IEA; GO:0005622|intracellular|IEA; GO:0005840|ribosome|IEA; GO:0006412|translation|IEA
FEX_0003204-mRNA7	F3x4	PositiveSelection	-6959.087806	0.11491	1.00000	0.11491	1.00000	0.11491	1.00000	27.72775	27.72775	1_R_0.828;2_H_0.982*;3_N_0.986*;4_N_0.954*;5_M_0.999**;6_E_0.907;7_I_0.978*;8_A_0.979*;9_I_0.553;10_K_0.986*;11_M_0.985*;16_L_0.720;18_H_0.579;19_Y_0.742;49_E_0.521;171_T_0.561;197_E_0.705;333_E_0.522;404_T_0.513;460_S_0.560;489_V_0.517;610_V_0.908;659_K_0.526;680_P_0.505;	Serine threonine-protein kinase plk4	Lasius niger	GO:0000166|nucleotide binding|IEA; GO:0004672|protein kinase activity|IEA; GO:0005524|ATP binding|IEA; GO:0006468|protein phosphorylation|IEA; GO:0016301|kinase activity|IEA; GO:0016310|phosphorylation|IEA
FEX_0010846-mRNA1	F3x4	PositiveSelection	-2812.871639	0.05395	1.00000	0.05395	1.00000	0.05395	1.00000	78.59398	78.59398	55_S_0.511;76_P_0.563;118_L_0.536;270_P_0.599;280_T_0.549;308_V_0.981*;309_R_0.809;310_K_0.957*;311_R_0.976*;312_T_0.545;	WW domain-binding protein 4 (Fragment)	Lasius niger	GO:0003676|nucleic acid binding|IEA; GO:0005634|nucleus|IEA; GO:0008270|zinc ion binding|IEA; GO:0046872|metal ion binding|IEA
FEX_0010885-mRNA1	F3x4	PositiveSelection	-1262.120130	0.14389	1.00000	0.14389	1.00000	0.14389	1.00000	549.66707	549.66707	6_N_0.545;21_K_0.695;28_A_0.686;30_Q_0.641;38_V_0.754;74_L_0.920;75_D_0.990*;76_I_1.000**;77_A_0.994**;78_A_0.999**;83_T_0.877;84_R_1.000**;86_A_0.999**;87_T_0.960*;88_D_0.998**;92_F_0.981*;93_S_0.998**;94_R_0.999**;95_R_0.996**;96_L_0.572;97_W_0.993**;99_A_0.997**;100_V_0.821;101_E_0.990**;102_E_0.999**;103_R_0.999**;104_E_0.999**;105_K_0.997**;108_M_0.551;109_N_0.997**;	Tripartite motif-containing protein 71	Lasius niger	NA
FEX_0010095-mRNA1	F3x4	PositiveSelection	-7039.425017	0.06486	1.00000	0.06486	1.00000	0.06486	1.00000	24.38209	24.38209	1_A_0.840;2_H_0.704;3_L_0.581;87_L_0.584;180_S_0.989*;181_L_0.938;189_E_0.975*;193_H_0.964*;197_F_0.559;302_P_0.511;588_V_0.569;640_E_0.633;674_E_0.975*;675_R_0.639;	Exosome component 10	Lasius niger	GO:0000166|nucleotide binding|IEA; GO:0000176|nuclear exosome (RNase complex)|IEA; GO:0003676|nucleic acid binding|IEA; GO:0003824|catalytic activity|IEA; GO:0005576|extracellular region|IEA; GO:0005622|intracellular|IEA; GO:0006139|nucleobase-containing compound metabolic process|IEA; GO:0006396|RNA processing|IEA; GO:0008408|3'-5' exonuclease activity|IEA; GO:0044237|cellular metabolic process|…
FEX_0012799-mRNA1	F3x4	PositiveSelection	-3044.451795	0.10714	1.00000	0.10714	1.00000	0.10714	1.00000	998.99646	998.99646	77_L_0.974*;80_T_0.982*;	Mitochondrial ribonuclease p protein 3	Linepithema humile	NA
FEX_0012809-mRNA1	F3x4	PositiveSelection	-2047.804602	0.03693	1.00000	0.03693	1.00000	0.03693	1.00000	8.98006	8.98006	30_D_0.717;39_N_0.517;42_Y_0.876;57_T_0.878;75_V_0.521;89_K_0.897;124_M_0.894;149_V_0.828;164_T_0.821;188_A_0.904;196_N_0.995**;223_E_0.543;	Ammonium transporter Rh type B	Vollenhovia emeryi	GO:0008519|ammonium transmembrane transporter activity|IEA; GO:0015696|ammonium transport|IEA; GO:0016020|membrane|IEA; GO:0016021|integral to membrane|IEA; GO:0072488|ammonium transmembrane transport|IEA
FEX_0002132-mRNA1	F3x4	PositiveSelection	-1651.977697	0.01511	1.00000	0.01511	1.00000	0.01511	1.00000	998.99919	998.99919	101_Y_0.561;206_Y_0.999**;207_D_0.994**;208_S_0.995**;209_N_0.995**;	Lrr domain-containing protein	Lasius niger	GO:0005576|extracellular region|IEA; GO:0006030|chitin metabolic process|IEA; GO:0008061|chitin binding|IEA
FEX_0004966-mRNA1	F3x4	PositiveSelection	-3494.720174	0.02403	1.00000	0.02403	1.00000	0.02403	1.00000	4.19843	4.19843	78_H_0.503;108_L_0.505;214_T_0.953*;	Electron transfer flavoprotein-ubiquinone oxidoreductase, mitochondrial	Camponotus floridanus	GO:0004174|electron-transferring-flavoprotein dehydrogenase activity|IEA; GO:0016491|oxidoreductase activity|IEA; GO:0055114|oxidation-reduction process|IEA
FEX_0000534-mRNA1	F3x4	PositiveSelection	-2645.217418	0.03330	1.00000	0.03330	1.00000	0.03330	1.00000	999.00000	999.00000	57_F_0.787;227_A_0.880;248_P_0.957*;249_P_1.000**;250_K_0.887;251_S_1.000**;252_Q_0.999**;253_I_0.967*;254_K_0.888;255_R_1.000**;256_Q_0.948;257_K_0.949;258_Y_1.000**;259_H_1.000**;262_F_0.916;263_G_1.000**;264_E_0.994**;265_F_0.929;266_G_0.994**;267_V_0.999**;269_E_1.000**;270_G_1.000**;271_Q_1.000**;272_F_0.939;273_T_1.000**;274_N_0.999**;276_H_0.999**;277_R_1.000**;278_I_0.994**;280_I_0.850;28…	Brain tumor protein	Camponotus floridanus	GO:0005622|intracellular|IEA; GO:0008270|zinc ion binding|IEA
FEX_0002024-mRNA1	F3x4	PositiveSelection	-478.080187	0.06980	1.00000	0.06980	1.00000	0.06980	1.00000	126.10201	126.10201	24_S_0.867;52_T_0.955*;	Thioredoxin	Camponotus floridanus	GO:0005623|cell|IEA; GO:0006662|glycerol ether metabolic process|IEA; GO:0015035|protein disulfide oxidoreductase activity|IEA; GO:0045454|cell redox homeostasis|IEA; GO:0055114|oxidation-reduction process|IEA
FEX_0006755-mRNA3	F3x4	PositiveSelection	-2005.388878	0.02080	1.00000	0.02080	1.00000	0.02080	1.00000	57.05325	57.05325	104_L_0.571;108_S_0.999**;109_A_0.993**;162_P_0.660;	Putative RNA-binding protein orb2	Camponotus floridanus	GO:0000166|nucleotide binding|IEA; GO:0003676|nucleic acid binding|IEA
FEX_0009330-mRNA4	F3x4	PositiveSelection	-2634.431505	0.05456	1.00000	0.05456	1.00000	0.05456	1.00000	7.93956	7.93956	1_E_0.966*;39_E_0.546;	Zinc finger protein 112-like protein (Fragment)	Camponotus floridanus	GO:0003676|nucleic acid binding|IEA; GO:0046872|metal ion binding|IEA
FEX_0003041-mRNA1	F3x4	PositiveSelection	-4742.119880	0.01525	1.00000	0.01525	1.00000	0.01525	1.00000	9.83568	9.83568	83_E_0.513;120_R_0.520;451_C_0.560;559_H_0.959*;560_N_0.571;	Pr domain zinc finger protein 15	Lasius niger	GO:0046872|metal ion binding|IEA
FEX_0002862-mRNA4	F3x4	PositiveSelection	-4178.979749	0.03250	1.00000	0.03250	1.00000	0.03250	1.00000	999.00000	999.00000	214_M_0.816;225_V_0.504;339_E_0.601;552_D_0.830;553_G_0.999**;554_I_0.998**;555_P_0.993**;556_T_0.999**;557_S_0.916;558_V_0.997**;559_F_0.860;560_V_0.842;561_R_0.994**;562_D_1.000**;563_E_0.825;564_P_0.876;565_H_0.853;566_K_0.988*;567_L_0.972*;568_V_0.998**;569_V_0.869;570_A_0.999**;571_Y_0.995**;572_E_0.999**;573_G_0.808;575_C_0.855;576_V_0.966*;577_I_0.841;578_F_0.869;579_D_0.994**;	Striatin-3 isoformx2	Lasius niger	NA
FEX_0009349-mRNA4	F3x4	PositiveSelection	-3144.026753	0.02420	1.00000	0.02420	1.00000	0.02420	1.00000	999.00000	999.00000	1_M_0.996**;2_G_0.635;4_G_0.998**;5_V_0.919;6_K_0.753;7_M_0.793;8_N_0.992**;9_S_0.998**;11_V_0.938;146_D_0.675;232_D_0.625;292_H_0.866;	pfam14681, UPRTase, Uracil phosphoribosyltransferase	Camponotus floridanus	NA
FEX_0010532-mRNA1	F3x4	PositiveSelection	-1458.554199	0.04223	1.00000	0.04223	1.00000	0.04223	1.00000	435.16876	435.16876	9_I_0.610;16_A_0.947;23_H_0.627;32_R_0.753;65_V_0.891;90_E_0.913;109_V_0.831;120_V_0.798;158_G_0.948;159_L_0.999**;160_C_0.998**;161_T_0.980*;162_S_1.000**;163_T_0.995**;	Ammonium transporter 1 member 2-like protein	Lasius niger	GO:0008519|ammonium transmembrane transporter activity|IEA; GO:0015696|ammonium transport|IEA; GO:0016020|membrane|IEA; GO:0016021|integral to membrane|IEA; GO:0072488|ammonium transmembrane transport|IEA
FEX_0005959-mRNA1	F3x4	PositiveSelection	-1589.175471	0.04043	1.00000	0.04043	1.00000	0.04043	1.00000	999.00000	999.00000	19_A_0.767;21_Q_0.727;154_T_0.876;173_C_1.000**;174_M_0.999**;175_R_0.992**;176_A_0.999**;177_Y_0.941;178_V_1.000**;179_E_0.902;180_F_1.000**;181_E_1.000**;182_I_0.937;183_E_1.000**;184_E_0.896;185_G_1.000**;186_A_0.915;	Probable E3 ubiquitin-protein ligase RNF144A	Camponotus floridanus	GO:0004842|ubiquitin-protein ligase activity|IEA; GO:0008270|zinc ion binding|IEA; GO:0016020|membrane|IEA; GO:0016021|integral to membrane|IEA; GO:0016567|protein ubiquitination|IEA; GO:0016874|ligase activity|IEA; GO:0046872|metal ion binding|IEA
FEX_0009336-mRNA1	F3x4	PositiveSelection	-1693.245157	0.10283	1.00000	0.10283	1.00000	0.10283	1.00000	58.62768	58.62768	15_I_0.916;36_G_0.976*;130_G_0.996**;132_G_0.971*;	Unassigned protein	Camponotus floridanus	NA
FEX_0002256-mRNA5	F3x4	PositiveSelection	-3082.361165	0.01006	1.00000	0.01006	1.00000	0.01006	1.00000	25.56743	25.56743	60_V_0.595;113_G_0.983*;	DNA methyltransferase 1-associated protein 1	Camponotus floridanus	GO:0005634|nucleus|IEA; GO:0006281|DNA repair|IEA; GO:0006338|chromatin remodeling|IEA; GO:0008168|methyltransferase activity|IEA; GO:0016740|transferase activity|IEA; GO:0032259|methylation|IEA; GO:0035267|NuA4 histone acetyltransferase complex|IEA; GO:0043967|histone H4 acetylation|IEA; GO:0043968|histone H2A acetylation|IEA; GO:0045892|negative regulation of transcription, DNA-dependent|IEA
FEX_0001234-mRNA1	F3x4	PositiveSelection	-13804.695200	0.13241	1.00000	0.13241	1.00000	0.13241	1.00000	119.40454	119.40454	246_D_0.907;803_Q_0.575;1279_D_0.892;1281_V_0.758;1285_R_0.908;1286_I_0.968*;1288_I_0.970*;1289_R_0.862;1293_S_0.966*;1294_V_0.995**;1298_S_0.983*;	Nucleolar pre-ribosomal-associated protein 1	Camponotus floridanus	NA
FEX_0000099-mRNA1	F3x4	PositiveSelection	-629.278956	0.02274	1.00000	0.02274	1.00000	0.02274	1.00000	75.56219	75.56219	73_S_0.970*;74_F_0.996**;	RNA (Guanine-9-)-methyltransferase domain-containing protein 2	Camponotus floridanus	GO:0008168|methyltransferase activity|IEA; GO:0016740|transferase activity|IEA; GO:0032259|methylation|IEA
FEX_0001315-mRNA1	F3x4	PositiveSelection	-10773.293182	0.09457	1.00000	0.09457	1.00000	0.09457	1.00000	998.99843	998.99843	501_D_0.583;891_G_0.680;894_V_0.965*;895_C_0.659;896_N_0.997**;897_H_0.995**;898_K_0.882;899_W_0.989*;901_I_0.999**;903_C_0.997**;904_C_0.871;	Tumor suppressor p53-binding protein 1	Camponotus floridanus	NA
FEX_0001239-mRNA1	F3x4	PositiveSelection	-7901.945540	0.04939	1.00000	0.04939	1.00000	0.04939	1.00000	42.41927	42.41927	304_A_0.837;448_Q_0.538;553_S_0.713;558_Q_0.537;621_S_0.979*;864_L_0.849;865_A_0.993**;866_D_0.997**;867_S_0.979*;869_L_0.974*;870_K_0.989*;873_D_0.988*;874_L_0.561;875_I_0.522;877_K_0.991**;	Nucleoprotein TPR	Camponotus floridanus	GO:0005622|intracellular|IEA; GO:0006606|protein import into nucleus|IEA; GO:0019013|viral nucleocapsid|IEA
FEX_0007585-mRNA3	F3x4	PositiveSelection	-870.341080	0.01891	1.00000	0.01891	1.00000	0.01891	1.00000	12.82544	12.82544	56_K_0.727;82_N_0.996**;84_K_0.877;85_P_0.912;86_F_0.822;87_S_0.999**;89_E_0.999**;90_Y_0.847;93_K_0.743;94_D_0.831;95_N_0.998**;97_K_0.999**;	Zinc finger and BTB domain-containing protein	Camponotus floridanus	GO:0003676|nucleic acid binding|IEA; GO:0008270|zinc ion binding|IEA; GO:0046872|metal ion binding|IEA
FEX_0001333-mRNA1	F3x4	PositiveSelection	-14227.915837	0.05195	1.00000	0.05195	1.00000	0.05195	1.00000	23.46971	23.46971	1116_P_0.513;1281_V_0.655;1387_S_0.918;1389_S_0.524;1469_S_0.968*;1471_V_0.959*;1472_I_0.946;	Mediator of rna polymerase ii transcription subunit 1	Lasius niger	GO:0001104|RNA polymerase II transcription cofactor activity|IEA; GO:0006357|regulation of transcription from RNA polymerase II promoter|IEA; GO:0016592|mediator complex|IEA
FEX_0001322-mRNA1	F3x4	PositiveSelection	-3839.319149	0.04116	1.00000	0.04116	1.00000	0.04116	1.00000	998.99991	998.99991	197_V_0.507;221_L_0.956*;299_G_0.502;439_P_0.548;	Muskelin	Camponotus floridanus	NA
FEX_0001235-mRNA8	F3x4	PositiveSelection	-3902.697113	0.05732	1.00000	0.05732	1.00000	0.05732	1.00000	998.99996	998.99996	21_R_0.720;149_S_0.994**;190_E_0.632;199_D_0.643;215_I_0.624;338_S_0.625;339_I_0.764;340_N_0.529;341_I_0.953*;342_T_0.981*;343_H_0.995**;344_N_0.767;345_K_0.657;395_L_0.761;396_T_0.854;398_L_0.985*;400_K_0.664;401_A_0.994**;402_P_0.999**;403_H_0.996**;404_R_0.854;405_V_0.911;406_C_0.823;407_I_0.996**;408_V_0.823;409_D_0.998**;410_E_0.981*;411_K_0.950;412_M_1.000**;413_Q_0.753;414_K_0.811;416_C_0.…	Histone deacetylase 6	Camponotus floridanus	GO:0008152|metabolic process|IEA; GO:0008270|zinc ion binding|IEA; GO:0016787|hydrolase activity|IEA
FEX_0006876-mRNA1	F3x4	PositiveSelection	-3099.905672	0.06298	1.00000	0.06298	1.00000	0.06298	1.00000	132.11316	132.11316	2_E_0.985*;3_K_0.582;158_Q_0.560;177_F_0.615;183_L_0.634;342_S_0.664;348_V_0.596;362_G_0.555;	Zinc finger protein 100	Camponotus floridanus	GO:0003676|nucleic acid binding|IEA; GO:0005634|nucleus|IEA; GO:0008270|zinc ion binding|IEA; GO:0046872|metal ion binding|IEA
FEX_0003525-mRNA4	F3x4	PositiveSelection	-3204.419986	0.04375	1.00000	0.04375	1.00000	0.04375	1.00000	256.90454	256.90454	1_A_0.800;4_T_0.655;18_E_0.981*;32_A_0.584;184_I_0.566;359_G_0.531;361_N_0.563;	Transmembrane protein c9orf91-like protein	Camponotus floridanus	GO:0016020|membrane|IEA; GO:0016021|integral to membrane|IEA
FEX_0001335-mRNA1	F3x4	PositiveSelection	-1267.997460	0.03323	1.00000	0.03323	1.00000	0.03323	1.00000	28.36367	28.36367	77_I_0.995**;82_F_0.558;	Fibrillin-2	Vollenhovia emeryi	GO:0005201|extracellular matrix structural constituent|IEA; GO:0005509|calcium ion binding|IEA; GO:0005578|proteinaceous extracellular matrix|IEA
FEX_0011731-mRNA2	F3x4	PositiveSelection	-4183.146154	0.04191	1.00000	0.04191	1.00000	0.04191	1.00000	25.96824	25.96824	23_A_0.602;244_A_0.526;290_A_0.614;404_E_0.950*;424_G_0.586;436_F_0.608;437_G_0.595;	Putative inorganic phosphate cotransporter	Camponotus floridanus	GO:0016020|membrane|IEA; GO:0016021|integral to membrane|IEA; GO:0055085|transmembrane transport|IEA
FEX_0001171-mRNA1	F3x4	PositiveSelection	-834.924003	0.01030	1.00000	0.01030	1.00000	0.01030	1.00000	999.00000	999.00000	28_L_0.877;29_R_0.817;30_K_1.000**;31_E_0.998**;32_L_0.983*;33_F_0.999**;34_S_0.995**;	Mitochondrial inner membrane protein OXA1L	Camponotus floridanus	GO:0016020|membrane|IEA; GO:0016021|integral to membrane|IEA; GO:0051205|protein insertion into membrane|IEA
FEX_0011851-mRNA1	F3x4	PositiveSelection	-2935.642667	0.02850	1.00000	0.02850	1.00000	0.02850	1.00000	98.36640	98.36640	1_C_1.000**;2_L_0.993**;3_E_0.998**;4_A_0.943;5_Q_0.994**;6_A_0.852;7_A_0.998**;8_A_0.999**;9_Q_0.993**;10_E_0.857;11_G_0.806;66_A_0.827;93_G_0.785;204_A_0.875;240_P_0.539;257_P_0.860;	Pre-mRNA-splicing regulator female-lethal(2)D	Linepithema humile	GO:0005634|nucleus|IEA; GO:0048024|regulation of nuclear mRNA splicing, via spliceosome|IEA
FEX_0011843-mRNA1	F3x4	PositiveSelection	-3626.489147	0.03789	1.00000	0.03789	1.00000	0.03789	1.00000	343.14878	343.14878	89_F_0.767;93_V_0.648;101_A_0.766;124_A_0.996**;159_A_0.711;348_I_0.656;471_V_0.998**;472_M_1.000**;473_I_0.997**;474_Q_0.999**;475_S_0.546;476_R_0.991**;477_E_0.999**;478_G_0.998**;	Transporter	Camponotus floridanus	GO:0005328|neurotransmitter:sodium symporter activity|IEA; GO:0006810|transport|IEA; GO:0006836|neurotransmitter transport|IEA; GO:0015293|symporter activity|IEA; GO:0016020|membrane|IEA; GO:0016021|integral to membrane|IEA; GO:0055085|transmembrane transport|IEA
FEX_0011839-mRNA1	F3x4	PositiveSelection	-1407.744488	0.00271	1.00000	0.00271	1.00000	0.00271	1.00000	15.36539	15.36539	19_E_0.565;105_K_0.855;114_V_0.681;123_L_0.701;163_R_0.982*;	Calcium release-activated calcium channel protein	Vollenhovia emeryi	GO:0016020|membrane|IEA; GO:0016021|integral to membrane|IEA
FEX_0011625-mRNA1	F3x4	PositiveSelection	-1643.646128	0.04772	1.00000	0.04772	1.00000	0.04772	1.00000	81.49696	81.49696	18_Q_0.873;23_I_0.578;24_G_0.942;25_L_0.651;28_G_0.987*;29_K_0.983*;34_V_0.993**;41_T_0.508;53_P_0.959*;58_Y_0.915;59_P_0.900;66_V_0.838;125_A_0.894;	Unassigned protein	Cerapachys biroi	NA
FEX_0001167-mRNA1	F3x4	PositiveSelection	-1407.043472	0.06912	1.00000	0.06912	1.00000	0.06912	1.00000	982.71293	982.71293	11_I_0.669;38_I_0.654;51_D_0.602;108_D_0.693;127_E_0.824;128_S_0.993**;129_V_0.804;130_H_0.988*;131_I_0.996**;132_V_0.928;134_N_0.799;	Pyrimidine-specific ribonucleoside hydrolase riha (Fragment)	Lasius niger	GO:0008152|metabolic process|IEA; GO:0016787|hydrolase activity|IEA
FEX_0007565-mRNA1	F3x4	PositiveSelection	-631.740603	0.07857	1.00000	0.07857	1.00000	0.07857	1.00000	999.00000	999.00000	3_P_0.505;5_M_0.635;6_D_0.506;7_E_0.514;8_S_0.526;9_S_0.552;10_L_0.513;11_C_0.551;12_P_0.522;14_H_0.520;20_W_0.525;21_L_0.537;23_I_0.505;28_N_0.561;29_L_0.532;31_Q_0.514;32_G_0.516;37_V_0.998**;38_C_0.993**;39_L_0.912;40_N_1.000**;41_D_0.960*;42_G_0.993**;43_Q_0.516;44_R_0.966*;45_C_1.000**;46_N_0.999**;47_L_0.930;48_I_0.524;49_D_0.853;	[R] COG0724 RNA-binding proteins (RRM domain)	Camponotus floridanus	NA
FEX_0005574-mRNA2	F3x4	PositiveSelection	-1411.917670	0.02849	1.00000	0.02849	1.00000	0.02849	1.00000	999.00000	999.00000	166_I_0.824;167_N_0.999**;168_N_0.997**;169_F_0.999**;170_R_0.868;171_P_0.998**;172_P_1.000**;173_L_0.842;174_P_0.855;177_N_0.861;178_R_1.000**;179_V_0.991**;180_L_0.830;181_R_0.999**;182_E_0.999**;183_C_0.838;184_G_1.000**;185_S_0.999**;	Carbonic anhydrase 2	Camponotus floridanus	GO:0004089|carbonate dehydratase activity|IEA; GO:0006730|one-carbon metabolic process|IEA; GO:0008270|zinc ion binding|IEA; GO:0046872|metal ion binding|IEA
FEX_0005582-mRNA1	F3x4	PositiveSelection	-2486.466704	0.03819	1.00000	0.03819	1.00000	0.03819	1.00000	5.16333	5.16333	136_R_0.972*;228_V_0.937;231_G_0.924;255_H_0.964*;	DUF3421 multi-domain protein	Camponotus floridanus	NA
FEX_0001399-mRNA2	F3x4	PositiveSelection	-1152.837087	0.09346	1.00000	0.09346	1.00000	0.09346	1.00000	50.36369	50.36369	34_N_0.502;54_P_0.826;66_T_0.994**;68_I_0.504;87_H_0.637;88_Y_0.869;97_I_0.681;98_Q_0.989*;100_A_0.995**;101_S_0.996**;102_N_0.865;103_S_0.988*;105_T_0.999**;	Thiamin pyrophosphokinase 1	Monomorium pharaonis	GO:0004788|thiamine diphosphokinase activity|IEA; GO:0005524|ATP binding|IEA; GO:0006772|thiamine metabolic process|IEA; GO:0009229|thiamine diphosphate biosynthetic process|IEA; GO:0016301|kinase activity|IEA; GO:0016310|phosphorylation|IEA; GO:0030975|thiamine binding|IEA
FEX_0002348-mRNA5	F3x4	PositiveSelection	-4196.979391	0.04517	1.00000	0.04517	1.00000	0.04517	1.00000	2.29252	2.29252	43_K_0.626;52_R_0.630;112_A_0.635;278_T_0.660;287_E_0.654;334_S_0.680;336_H_0.674;337_P_0.676;340_H_0.657;343_R_0.632;414_G_0.552;440_D_0.967*;451_S_0.662;453_S_0.640;470_V_0.615;	Transmembrane protein 200a	Lasius niger	GO:0016021|integral to membrane|IEA
FEX_0000684-mRNA1	F3x4	PositiveSelection	-7472.844118	0.09076	1.00000	0.09076	1.00000	0.09076	1.00000	999.00000	999.00000	102_I_0.623;196_P_0.544;377_S_0.554;579_S_0.548;728_G_0.664;729_K_0.874;730_F_0.992**;733_I_0.935;734_V_0.530;735_S_0.753;736_G_0.603;738_R_0.774;	Rrp12-like protein	Lasius niger	NA
FEX_0007515-mRNA1	F3x4	PositiveSelection	-2793.551300	0.13217	1.00000	0.13217	1.00000	0.13217	1.00000	18.50962	18.50962	5_F_0.627;6_W_0.903;11_T_0.597;28_S_0.580;32_K_0.981*;36_M_0.532;57_I_0.622;58_D_0.691;69_S_0.538;70_S_0.952*;73_I_0.551;96_L_0.730;97_A_0.595;99_T_0.794;101_L_0.509;108_L_0.840;113_D_0.704;117_L_0.551;122_H_0.580;126_Y_0.992**;128_Q_0.979*;129_F_0.632;130_D_0.749;131_L_0.963*;132_Y_0.981*;133_R_0.885;134_K_0.907;142_S_0.868;175_E_0.917;191_T_0.633;203_I_0.604;	Coiled-coil domain-containing protein 50	Camponotus floridanus	NA
FEX_0005269-mRNA1	F3x4	PositiveSelection	-1954.019878	0.01708	1.00000	0.01708	1.00000	0.01708	1.00000	35.28072	35.28072	40_A_0.645;112_K_0.504;126_M_0.986*;	DDOST_48kD multi-domain protein	Camponotus floridanus	NA
FEX_0003622-mRNA4	F3x4	PositiveSelection	-1995.655600	0.12580	1.00000	0.12580	1.00000	0.12580	1.00000	7.98164	7.98164	17_A_0.777;25_T_0.829;65_E_0.734;87_L_0.811;88_V_0.656;90_M_0.546;91_I_0.797;112_L_0.801;116_Q_0.819;160_D_0.676;187_D_0.817;202_T_0.985*;	G-protein coupled receptor Mth2 (Fragment)	Linepithema humile	GO:0004888|transmembrane signaling receptor activity|IEA; GO:0004930|G-protein coupled receptor activity|IEA; GO:0007166|cell surface receptor signaling pathway|IEA; GO:0007186|G-protein coupled receptor signaling pathway|IEA; GO:0016020|membrane|IEA; GO:0016021|integral to membrane|IEA
FEX_0001853-mRNA1	F3x4	PositiveSelection	-1243.678332	0.08480	1.00000	0.08480	1.00000	0.08480	1.00000	999.00000	999.00000	4_G_0.967*;9_T_0.980*;10_D_0.658;21_S_0.984*;60_D_0.996**;61_E_0.996**;62_G_0.996**;66_P_0.922;97_G_0.994**;98_S_0.998**;99_D_1.000**;100_N_1.000**;101_Y_0.976*;102_L_0.977*;103_I_1.000**;104_T_0.996**;105_H_1.000**;107_R_1.000**;108_P_1.000**;109_N_1.000**;110_P_0.980*;111_D_1.000**;112_L_0.999**;113_Y_1.000**;114_G_1.000**;115_W_0.999**;116_V_0.999**;118_V_0.995**;119_T_0.998**;120_L_0.976*;121…	Zinc transporter 9	Lasius niger	GO:0006812|cation transport|IEA; GO:0008324|cation transmembrane transporter activity|IEA; GO:0016020|membrane|IEA; GO:0016021|integral to membrane|IEA; GO:0055085|transmembrane transport|IEA; GO:0098655||IEA
FEX_0006863-mRNA1	F3x4	PositiveSelection	-2210.724095	0.02463	1.00000	0.02463	1.00000	0.02463	1.00000	201.00968	201.00968	305_S_0.954*;306_K_0.999**;307_G_0.992**;308_A_0.900;309_H_0.934;310_G_0.822;311_G_0.998**;312_H_0.995**;313_A_0.526;314_H_0.979*;315_H_0.993**;316_E_0.801;317_Q_0.988*;318_H_0.997**;	Otopetrin-2	Camponotus floridanus	GO:0016020|membrane|IEA; GO:0016021|integral to membrane|IEA
FEX_0000459-mRNA1	F3x4	PositiveSelection	-6645.574714	0.06612	1.00000	0.06612	1.00000	0.06612	1.00000	88.55640	88.55640	86_D_0.738;127_P_0.795;131_G_0.591;173_I_0.709;316_V_0.710;334_E_0.842;416_Y_0.548;419_K_0.532;442_E_0.565;514_T_0.690;641_H_0.995**;644_I_0.723;645_N_0.813;646_V_0.972*;647_C_0.971*;648_E_0.994**;649_D_0.978*;650_L_0.839;651_D_0.992**;652_W_0.846;653_K_0.710;654_S_0.828;656_P_0.996**;657_T_0.997**;659_S_0.842;660_I_0.859;661_T_0.997**;662_D_0.997**;663_E_0.999**;664_A_0.927;667_Y_0.995**;668_T_0…	Nuclear pore complex protein Nup98-Nup96	Lasius niger	GO:0005643|nuclear pore|IEA; GO:0006810|transport|IEA
FEX_0011056-mRNA1	F3x4	PositiveSelection	-1956.166671	0.11180	1.00000	0.11180	1.00000	0.11180	1.00000	230.78648	230.78648	17_P_0.513;162_C_0.601;165_S_0.886;167_S_0.957*;	Zinc transporter zip13-like protein	Camponotus floridanus	GO:0016020|membrane|IEA; GO:0016021|integral to membrane|IEA; GO:0030001|metal ion transport|IEA; GO:0046873|metal ion transmembrane transporter activity|IEA; GO:0055085|transmembrane transport|IEA
FEX_0009529-mRNA1	F3x4	PositiveSelection	-948.440498	0.01369	1.00000	0.01369	1.00000	0.01369	1.00000	73.04523	73.04523	46_G_0.923;47_L_0.933;51_Q_0.906;60_T_0.790;62_S_1.000**;63_A_1.000**;65_G_0.563;66_I_0.999**;67_G_0.976*;68_Q_0.999**;69_G_0.999**;70_D_0.994**;71_D_1.000**;73_Q_0.998**;74_K_0.970*;75_R_0.997**;76_H_0.999**;77_R_1.000**;78_T_0.996**;81_T_0.988*;82_P_0.999**;83_A_0.965*;84_Q_1.000**;	Homeobox protein orthopedia	Camponotus floridanus	GO:0003677|DNA binding|IEA; GO:0005634|nucleus|IEA
FEX_0009536-mRNA4	F3x4	PositiveSelection	-9926.138821	0.09710	1.00000	0.09710	1.00000	0.09710	1.00000	71.50388	71.50388	21_P_0.511;498_R_0.941;500_P_0.915;501_H_0.734;811_S_0.984*;1006_L_0.507;	ADAMTS-like protein 3 (Fragment)	Camponotus floridanus	GO:0005578|proteinaceous extracellular matrix|IEA; GO:0006508|proteolysis|IEA; GO:0008233|peptidase activity|IEA; GO:0008237|metallopeptidase activity|IEA; GO:0008270|zinc ion binding|IEA
FEX_0003049-mRNA1	F3x4	PositiveSelection	-2759.261309	0.05885	1.00000	0.05885	1.00000	0.05885	1.00000	998.99949	998.99949	2_R_0.923;3_G_0.999**;4_V_0.999**;5_D_0.801;6_R_0.798;8_S_0.917;9_D_0.999**;10_D_0.795;11_S_1.000**;12_S_1.000**;13_R_0.882;14_R_0.794;15_A_0.816;55_R_0.795;88_N_0.605;100_G_0.644;170_I_0.836;299_S_0.863;300_A_0.935;301_S_0.999**;302_V_0.999**;303_D_0.999**;304_L_0.998**;305_E_1.000**;306_E_0.773;307_S_1.000**;308_N_0.997**;309_V_0.992**;310_S_0.920;312_S_0.922;313_G_1.000**;314_S_0.999**;315_P_0…	Phosphofurin acidic cluster sorting protein 2	Camponotus floridanus	NA
FEX_0008360-mRNA1	F3x4	PositiveSelection	-3347.692244	0.07042	1.00000	0.07042	1.00000	0.07042	1.00000	999.00000	999.00000	17_V_0.554;168_S_0.506;233_H_0.682;310_L_0.575;313_V_0.773;354_L_0.968*;355_A_0.769;356_R_0.995**;357_D_0.999**;358_I_0.997**;359_L_0.998**;360_G_1.000**;361_F_1.000**;362_N_0.964*;363_F_0.907;364_N_0.964*;	Hexamerin 2	Lasius niger	NA
FEX_0003482-mRNA1	F3x4	PositiveSelection	-2328.008837	0.06458	1.00000	0.06458	1.00000	0.06458	1.00000	999.00000	999.00000	212_A_0.716;213_G_0.980*;217_G_0.975*;219_P_0.985*;	Electron transfer flavoprotein subunit mitochondrial (Fragment)	Camponotus floridanus	GO:0003735|structural constituent of ribosome|IEA; GO:0005634|nucleus|IEA; GO:0005840|ribosome|IEA; GO:0006412|translation|IEA; GO:0030529|ribonucleoprotein complex|IEA; GO:0042254|ribosome biogenesis|IEA
FEX_0010192-mRNA3	F3x4	PositiveSelection	-3198.055737	0.04902	1.00000	0.04902	1.00000	0.04902	1.00000	999.00000	999.00000	33_I_0.752;38_E_0.733;54_T_0.532;107_E_0.712;247_D_0.600;269_I_0.802;405_V_0.992**;406_L_0.742;407_T_0.905;408_Y_0.988*;	UBX domain-containing protein 1	Camponotus floridanus	NA
FEX_0010185-mRNA1	F3x4	PositiveSelection	-2511.532461	0.16808	1.00000	0.16808	1.00000	0.16808	1.00000	40.54436	40.54436	1_R_0.999**;2_S_0.999**;3_W_0.978*;4_I_0.855;5_Y_0.603;6_L_0.927;7_R_0.987*;8_G_0.925;9_E_0.994**;11_S_0.503;13_L_0.983*;14_E_0.577;16_L_0.994**;17_A_0.662;18_E_0.572;19_I_0.940;20_S_0.993**;22_R_0.959*;23_K_0.522;46_F_0.687;65_T_0.835;80_Y_0.528;86_L_0.674;93_L_0.643;99_V_0.565;133_D_0.545;171_Y_0.620;	Sugar transporter	Lasius niger	GO:0006810|transport|IEA; GO:0008643|carbohydrate transport|IEA; GO:0016020|membrane|IEA; GO:0016021|integral to membrane|IEA; GO:0022857|transmembrane transporter activity|IEA; GO:0022891|substrate-specific transmembrane transporter activity|IEA; GO:0055085|transmembrane transport|IEA
FEX_0010711-mRNA1	F3x4	PositiveSelection	-2015.491291	0.18754	1.00000	0.18754	1.00000	0.18754	1.00000	20.28272	20.28272	94_R_0.923;102_K_0.751;106_E_0.977*;	Forkhead transcription factor HCM1	Lasius niger	GO:0003677|DNA binding|IEA; GO:0003700|sequence-specific DNA binding transcription factor activity|IEA; GO:0005634|nucleus|IEA; GO:0006351|transcription, DNA-dependent|IEA; GO:0006355|regulation of transcription, DNA-dependent|IEA; GO:0043565|sequence-specific DNA binding|IEA
FEX_0010706-mRNA1	F3x4	PositiveSelection	-3123.534700	0.05633	1.00000	0.05633	1.00000	0.05633	1.00000	999.00000	999.00000	173_L_0.543;233_V_0.716;291_I_0.850;293_S_0.940;294_L_0.985*;295_L_0.573;296_L_0.884;300_K_0.999**;301_C_0.970*;302_L_0.995**;303_S_0.996**;304_F_0.989*;305_P_0.772;307_Y_0.997**;309_V_0.945;310_L_0.998**;312_M_0.956*;313_R_0.998**;314_K_0.816;316_L_0.960*;317_I_0.755;319_H_0.993**;320_L_0.989*;322_Y_0.999**;	PREDICTED: testis-specific serine/threonine-protein kinase 1-like isoform X3	Camponotus floridanus	NA
FEX_0008538-mRNA1	F3x4	PositiveSelection	-3205.348350	0.02948	1.00000	0.02948	1.00000	0.02948	1.00000	73.75131	73.75131	70_T_0.968*;293_Q_0.950;	PREDICTED: PTB domain-containing engulfment adapter protein 1-like	Camponotus floridanus	NA
FEX_0008545-mRNA6	F3x4	PositiveSelection	-1607.829475	0.07265	1.00000	0.07265	1.00000	0.07265	1.00000	999.00000	999.00000	27_G_0.991**;30_E_0.948;34_A_0.922;66_Q_0.709;136_Y_0.554;138_G_0.925;141_G_0.998**;142_S_0.935;143_V_0.947;144_D_0.951*;145_C_0.996**;146_L_0.999**;147_D_1.000**;148_G_0.998**;149_A_0.982*;150_N_0.998**;151_F_0.990*;152_R_0.994**;153_L_0.940;154_V_0.588;155_D_0.910;156_N_0.998**;157_D_1.000**;160_L_0.980*;161_A_0.955*;	Ankyrin repeat domain-containing protein 28	Camponotus floridanus	NA
FEX_0008536-mRNA1	F3x4	PositiveSelection	-1807.476106	0.01414	1.00000	0.01414	1.00000	0.01414	1.00000	1.64783	1.64783	14_A_0.992**;15_T_0.647;54_A_0.651;92_D_0.541;157_L_0.628;179_I_0.646;	Pre-mrna-splicing factor syf2-like protein	Lasius niger	NA
FEX_0003574-mRNA1	F3x4	PositiveSelection	-1901.809289	0.03897	1.00000	0.03897	1.00000	0.03897	1.00000	999.00000	999.00000	65_L_0.599;143_S_0.795;169_R_0.569;190_E_0.696;213_E_0.999**;214_E_1.000**;215_H_1.000**;216_R_0.902;217_L_0.996**;218_S_0.982*;219_L_1.000**;220_D_0.912;	Nuclear receptor-binding factor 2 (Fragment)	Lasius niger	NA
FEX_0007704-mRNA5	F3x4	PositiveSelection	-2375.299306	0.03700	1.00000	0.03700	1.00000	0.03700	1.00000	84.34047	84.34047	99_S_0.796;148_P_0.794;216_S_0.792;281_N_0.825;349_I_0.986*;351_I_0.801;	PREDICTED: protein phosphatase 1 regulatory subunit 12A isoform X10	Camponotus floridanus	NA
FEX_0006940-mRNA1	F3x4	PositiveSelection	-1752.863997	0.00419	1.00000	0.00419	1.00000	0.00419	1.00000	998.99854	998.99854	224_G_0.974*;225_I_0.997**;226_A_1.000**;227_E_1.000**;228_L_0.967*;229_V_0.978*;231_S_0.999**;232_T_1.000**;233_I_0.999**;234_Q_0.972*;235_D_0.831;236_I_1.000**;237_D_0.998**;238_I_0.991**;239_R_0.874;240_S_0.872;241_E_1.000**;242_L_0.992**;243_Y_0.933;245_H_0.999**;246_I_0.999**;	PREDICTED: actin-related protein 2 isoform X3	Harpegnathos saltator	NA
FEX_0001372-mRNA1	F3x4	PositiveSelection	-1769.962359	0.05984	1.00000	0.05984	1.00000	0.05984	1.00000	19.99454	19.99454	66_A_0.982*;71_L_0.717;	THUMP domain-containing protein 3	Camponotus floridanus	GO:0003723|RNA binding|IEA
FEX_0007736-mRNA1	F3x4	PositiveSelection	-3793.093098	0.15256	1.00000	0.15256	1.00000	0.15256	1.00000	37.32253	37.32253	118_K_0.571;131_S_0.966*;134_V_0.637;291_S_0.805;292_L_0.996**;293_S_0.991**;294_Q_0.998**;295_E_0.984*;298_L_0.982*;301_I_0.771;304_E_0.952*;306_L_0.855;308_N_0.988*;	SET and MYND domain-containing protein 5	Camponotus floridanus	NA
FEX_0013422-mRNA1	F3x4	PositiveSelection	-3214.099851	0.04067	1.00000	0.04067	1.00000	0.04067	1.00000	537.50107	537.50107	56_G_0.991**;57_I_0.989*;59_T_0.961*;60_E_0.991**;61_R_0.944;75_P_0.541;126_G_0.524;193_E_0.506;221_D_0.531;257_R_0.517;280_V_0.544;	Thrombospondin type-1 domain-containing protein 4	Acromyrmex echinatior	GO:0004222|metalloendopeptidase activity|IEA; GO:0005578|proteinaceous extracellular matrix|IEA; GO:0006508|proteolysis|IEA; GO:0008233|peptidase activity|IEA; GO:0008237|metallopeptidase activity|IEA; GO:0008270|zinc ion binding|IEA; GO:0031012|extracellular matrix|IEA
FEX_0012610-mRNA1	F3x4	PositiveSelection	-10637.632211	0.17071	1.00000	0.17071	1.00000	0.17071	1.00000	289.06871	289.06871	123_K_0.524;280_T_0.529;329_F_0.554;345_F_0.971*;353_S_0.681;356_S_0.505;381_E_0.549;516_T_0.830;530_S_0.970*;531_L_0.906;737_Q_0.913;775_P_0.707;868_A_0.567;	pfam00313, CSD, 'Cold-shock' DNA-binding domain	Camponotus floridanus	NA
FEX_0002671-mRNA5	F3x4	PositiveSelection	-1732.384705	0.06294	1.00000	0.06294	1.00000	0.06294	1.00000	999.00000	999.00000	1_S_1.000**;2_R_0.940;4_D_0.955*;5_V_0.753;6_E_0.779;7_R_0.635;11_E_0.998**;12_T_0.897;13_D_0.552;18_P_0.627;19_F_0.712;20_R_0.982*;21_S_0.975*;22_P_0.548;23_H_0.957*;24_R_0.997**;25_R_0.990*;26_K_0.994**;27_R_0.993**;28_D_0.925;30_D_0.859;60_E_0.819;136_D_0.862;	Endothelin-converting enzyme 1	Camponotus floridanus	GO:0004222|metalloendopeptidase activity|IEA; GO:0006508|proteolysis|IEA; GO:0016020|membrane|IEA; GO:0016021|integral to membrane|IEA
FEX_0008486-mRNA1	F3x4	PositiveSelection	-2933.133406	0.07171	1.00000	0.07171	1.00000	0.07171	1.00000	40.66882	40.66882	5_T_0.520;7_K_0.584;9_I_0.891;11_P_0.965*;12_S_0.937;13_E_0.942;15_L_0.720;19_E_0.724;22_K_0.983*;	Vitamin K-dependent gamma-carboxylase	Camponotus floridanus	GO:0008488|gamma-glutamyl carboxylase activity|IEA; GO:0016020|membrane|IEA; GO:0016021|integral to membrane|IEA; GO:0017187|peptidyl-glutamic acid carboxylation|IEA
FEX_0008467-mRNA1	F3x4	PositiveSelection	-3919.549244	0.02356	1.00000	0.02356	1.00000	0.02356	1.00000	46.40942	46.40942	466_K_0.648;480_S_0.795;483_N_0.576;484_K_0.999**;486_Q_0.997**;	Gastrulation defective protein 1-like protein	Lasius niger	NA
FEX_0007304-mRNA1	F3x4	PositiveSelection	-1004.855535	0.04172	1.00000	0.04172	1.00000	0.04172	1.00000	359.56163	359.56163	3_E_0.778;7_K_0.542;84_V_0.717;93_V_0.503;117_L_0.996**;	Dual oxidase maturation factor 1	Vollenhovia emeryi	GO:0005789|endoplasmic reticulum membrane|IEA; GO:0015031|protein transport|IEA; GO:0016020|membrane|IEA; GO:0016021|integral to membrane|IEA
FEX_0006412-mRNA1	F3x4	PositiveSelection	-2788.273182	0.05575	1.00000	0.05575	1.00000	0.05575	1.00000	18.45061	18.45061	1_E_0.983*;4_L_0.719;179_A_0.860;194_M_0.505;306_R_0.624;	Reticulon-4-interacting protein 1	Lasius niger	GO:0008270|zinc ion binding|IEA; GO:0016020|membrane|IEA; GO:0016021|integral to membrane|IEA; GO:0016491|oxidoreductase activity|IEA; GO:0055114|oxidation-reduction process|IEA
FEX_0006415-mRNA2	F3x4	PositiveSelection	-6037.731518	0.00904	1.00000	0.00904	1.00000	0.00904	1.00000	11.33308	11.33308	130_H_0.591;299_P_0.615;339_C_0.643;571_G_0.623;601_V_0.677;646_P_0.639;665_V_0.541;704_K_0.546;709_E_0.983*;844_V_0.837;845_N_0.579;846_K_0.907;	Sister chromatid cohesion protein PDS5-like protein B-B	Lasius niger	NA
FEX_0004727-mRNA4	F3x4	PositiveSelection	-1622.791634	0.09870	1.00000	0.09870	1.00000	0.09870	1.00000	4.99311	4.99311	1_Q_0.956*;49_M_0.582;70_E_0.539;102_S_0.595;109_A_0.546;151_S_0.621;	DUF572 multi-domain protein	Monomorium pharaonis	NA
FEX_0012523-mRNA1	F3x4	PositiveSelection	-6029.530311	0.12577	1.00000	0.12577	1.00000	0.12577	1.00000	196.29152	196.29152	243_E_0.596;310_T_0.913;443_S_0.986*;444_S_0.778;445_L_0.587;447_D_0.637;448_A_0.883;452_K_0.838;454_Q_0.605;455_T_0.910;456_F_0.851;457_R_0.814;458_I_0.510;462_S_0.969*;464_S_0.951*;467_F_0.691;	Mediator of DNA damage checkpoint protein 1	Camponotus floridanus	NA
FEX_0010550-mRNA1	F3x4	PositiveSelection	-4467.759045	0.03691	1.00000	0.03691	1.00000	0.03691	1.00000	338.48469	338.48469	135_G_0.764;158_S_0.536;344_S_0.677;469_A_0.731;557_P_0.992**;558_Y_0.994**;560_F_1.000**;561_E_0.970*;562_E_1.000**;563_I_0.646;564_V_0.776;565_L_0.531;567_E_0.988*;568_T_0.995**;569_V_0.854;571_A_0.998**;572_C_0.778;573_G_0.999**;574_P_0.785;575_R_0.990*;	Exocyst complex component	Camponotus floridanus	GO:0000145|exocyst|IEA; GO:0006893|Golgi to plasma membrane transport|IEA
FEX_0005485-mRNA1	F3x4	PositiveSelection	-2454.513606	0.07249	1.00000	0.07249	1.00000	0.07249	1.00000	108.15059	108.15059	33_K_0.982*;163_S_0.669;	Peptide chain release factor 1-like, mitochondrial	Camponotus floridanus	GO:0003747|translation release factor activity|IEA; GO:0005737|cytoplasm|IEA; GO:0006415|translational termination|IEA; GO:0016149|translation release factor activity, codon specific|IEA
FEX_0010433-mRNA1	F3x4	PositiveSelection	-5582.181543	0.08933	1.00000	0.08933	1.00000	0.08933	1.00000	70.76886	70.76886	41_S_0.704;143_E_0.548;265_Q_0.986*;312_S_0.656;316_T_0.997**;317_Y_0.706;318_D_0.775;319_R_0.754;322_L_0.835;330_N_0.613;332_K_0.586;371_A_0.531;372_L_0.877;395_N_0.555;402_Q_0.982*;449_A_0.608;496_P_0.696;503_V_0.518;	Protein TKR	Lasius niger	GO:0003677|DNA binding|IEA
FEX_0000625-mRNA1	F3x4	PositiveSelection	-1801.289511	0.04020	1.00000	0.04020	1.00000	0.04020	1.00000	4.87517	4.87517	27_I_0.653;37_V_0.505;123_C_0.756;136_S_0.763;138_K_0.953*;147_R_0.725;	N-acetylserotonin O-methyltransferase-like protein	Camponotus floridanus	GO:0005737|cytoplasm|IEA; GO:0008168|methyltransferase activity|IEA; GO:0016740|transferase activity|IEA; GO:0032259|methylation|IEA
FEX_0002488-mRNA1	F3x4	PositiveSelection	-2061.359521	0.04142	1.00000	0.04142	1.00000	0.04142	1.00000	31.44544	31.44544	225_L_0.955*;	[Pyruvate dehydrogenase [acetyl-transferring]]-phosphatase 1, mitochondrial	Lasius niger	GO:0003824|catalytic activity|IEA; GO:0004721|phosphoprotein phosphatase activity|IEA; GO:0004722|protein serine/threonine phosphatase activity|IEA; GO:0006470|protein dephosphorylation|IEA; GO:0016787|hydrolase activity|IEA; GO:0043169|cation binding|IEA; GO:0046872|metal ion binding|IEA
FEX_0005103-mRNA6	F3x4	PositiveSelection	-11186.139156	0.07562	1.00000	0.07562	1.00000	0.07562	1.00000	70.64095	70.64095	13_S_0.545;159_H_0.529;348_Y_0.539;651_T_0.513;702_D_0.892;759_R_0.510;764_A_0.576;803_I_0.933;1056_L_0.632;1058_Y_0.994**;1059_D_0.990*;1060_T_0.542;1062_S_0.961*;1063_P_0.949;1064_A_0.832;1067_S_0.994**;	Trinucleotide repeat-containing gene 18 protein	Camponotus floridanus	GO:0003682|chromatin binding|IEA; GO:0030154|cell differentiation|IEA
FEX_0008150-mRNA1	F3x4	PositiveSelection	-5895.571406	0.04680	1.00000	0.04680	1.00000	0.04680	1.00000	71.10741	71.10741	1_M_0.993**;2_C_0.992**;3_A_0.975*;4_C_0.998**;5_K_0.999**;6_W_0.827;7_K_0.992**;9_G_0.998**;10_K_1.000**;12_W_0.994**;14_E_0.999**;15_C_1.000**;16_A_0.995**;17_N_1.000**;18_R_0.999**;21_K_0.623;76_V_0.838;141_V_0.640;186_P_0.744;260_V_0.700;265_T_0.655;393_R_0.802;499_G_0.847;505_L_0.720;521_P_0.671;640_A_0.646;	Peroxidasin-like protein	Lasius niger	GO:0016020|membrane|IEA; GO:0016021|integral to membrane|IEA
FEX_0001622-mRNA1	F3x4	PositiveSelection	-7058.777005	0.04804	1.00000	0.04804	1.00000	0.04804	1.00000	48.76373	48.76373	1_Q_0.985*;3_K_0.990*;4_Q_0.997**;5_L_0.911;6_Q_0.960*;7_F_0.917;9_F_0.998**;10_D_0.523;324_T_0.614;365_A_0.596;392_Q_0.561;416_A_0.623;482_M_0.776;577_S_0.562;614_R_0.601;677_N_0.985*;716_I_0.508;	Kinesin-like protein	Lasius niger	GO:0000166|nucleotide binding|IEA; GO:0003777|microtubule motor activity|IEA; GO:0005524|ATP binding|IEA; GO:0005871|kinesin complex|IEA; GO:0005874|microtubule|IEA; GO:0007018|microtubule-based movement|IEA; GO:0008017|microtubule binding|IEA; GO:0008152|metabolic process|IEA
FEX_0005984-mRNA2	F3x4	PositiveSelection	-3198.760153	0.05743	1.00000	0.05743	1.00000	0.05743	1.00000	6.75697	6.75697	96_A_0.970*;234_T_0.596;334_L_0.525;	Heparan-alpha-glucosaminide N-acetyltransferase	Camponotus floridanus	GO:0008152|metabolic process|IEA; GO:0016020|membrane|IEA; GO:0016021|integral to membrane|IEA; GO:0016740|transferase activity|IEA
FEX_0011879-mRNA2	F3x4	PositiveSelection	-3199.982243	0.04166	1.00000	0.04166	1.00000	0.04166	1.00000	15.28184	15.28184	177_D_0.677;181_P_0.636;183_S_0.706;184_G_0.597;292_S_0.980*;366_P_0.667;	DNA polymerase iota	Camponotus floridanus	GO:0003677|DNA binding|IEA; GO:0003684|damaged DNA binding|IEA; GO:0006281|DNA repair|IEA
FEX_0011909-mRNA1	F3x4	PositiveSelection	-4220.862568	0.01401	1.00000	0.01401	1.00000	0.01401	1.00000	999.00000	999.00000	585_S_0.906;588_P_0.953*;590_N_0.616;591_G_0.567;592_E_0.684;594_G_0.856;595_K_0.724;597_T_0.846;	Diacylglycerol kinase	Cerapachys biroi	GO:0000166|nucleotide binding|IEA; GO:0003676|nucleic acid binding|IEA; GO:0004143|diacylglycerol kinase activity|IEA; GO:0005524|ATP binding|IEA; GO:0005622|intracellular|IEA; GO:0007165|signal transduction|IEA; GO:0007205|protein kinase C-activating G-protein coupled receptor signaling pathway|IEA; GO:0016301|kinase activity|IEA; GO:0016310|phosphorylation|IEA; GO:0016740|transferase activity|I…
FEX_0011874-mRNA1	F3x4	PositiveSelection	-858.372480	0.03817	1.00000	0.03817	1.00000	0.03817	1.00000	453.00965	453.00965	62_S_0.946;63_N_0.991**;64_A_0.948;65_V_0.998**;66_T_0.999**;	EGF-like, fibronectin type-III and laminin G-like domain-containing protein (Fragment)	Acromyrmex echinatior	NA
FEX_0003209-mRNA1	F3x4	PositiveSelection	-7084.890118	0.05402	1.00000	0.05402	1.00000	0.05402	1.00000	5.05403	5.05403	44_N_0.506;65_E_0.748;96_N_0.782;116_M_0.698;194_S_0.985*;291_N_0.755;312_N_0.839;335_L_0.843;340_E_0.777;343_L_0.857;347_D_0.809;350_M_0.698;485_L_0.590;524_T_0.829;525_L_0.816;540_G_0.782;560_A_0.840;573_I_0.738;577_Q_0.821;578_I_0.686;581_S_0.840;582_E_0.841;586_N_0.703;597_W_0.847;615_D_0.812;625_A_0.880;631_N_0.652;640_T_0.742;643_Y_0.589;662_E_0.803;663_H_0.794;665_K_0.803;671_M_0.623;672_N…	Tuftelin-interacting protein 11	Lasius niger	GO:0003676|nucleic acid binding|IEA; GO:0003677|DNA binding|IEA; GO:0005634|nucleus|IEA; GO:0005681|spliceosomal complex|IEA; GO:0006355|regulation of transcription, DNA-dependent|IEA; GO:0006397|mRNA processing|IEA; GO:0008380|RNA splicing|IEA
FEX_0001078-mRNA2	F3x4	PositiveSelection	-1424.803090	0.09246	1.00000	0.09246	1.00000	0.09246	1.00000	999.00000	999.00000	35_D_0.691;72_S_0.987*;76_N_0.764;	Ras-related protein Rab-24	Camponotus floridanus	GO:0005525|GTP binding|IEA; GO:0005622|intracellular|IEA; GO:0007264|small GTPase mediated signal transduction|IEA
FEX_0005352-mRNA1	F3x4	PositiveSelection	-3671.904694	0.07253	1.00000	0.07253	1.00000	0.07253	1.00000	148.11202	148.11202	151_A_0.661;157_P_0.550;259_K_0.953*;	DUF4497 multi-domain protein	Camponotus floridanus	NA
FEX_0002726-mRNA1	F3x4	PositiveSelection	-10309.366798	0.04579	1.00000	0.04579	1.00000	0.04579	1.00000	35.21776	35.21776	107_A_0.514;146_T_0.957*;240_S_0.641;582_N_0.646;586_R_0.580;645_S_0.529;664_P_0.893;854_A_0.618;1182_D_0.614;	DE-cadherin	Camponotus floridanus	GO:0005509|calcium ion binding|IEA; GO:0005886|plasma membrane|IEA; GO:0007155|cell adhesion|IEA; GO:0007156|homophilic cell adhesion|IEA; GO:0016020|membrane|IEA; GO:0016021|integral to membrane|IEA
FEX_0006803-mRNA1	F3x4	PositiveSelection	-32965.798729	0.06278	1.00000	0.06278	1.00000	0.06278	1.00000	33.75175	33.75175	91_S_0.588;93_S_0.650;237_K_0.553;344_K_0.565;356_K_0.574;361_S_0.554;369_V_0.553;438_P_0.549;637_A_0.584;650_E_0.546;692_K_0.548;823_D_0.584;973_P_0.574;1039_E_0.538;1216_D_0.558;1219_S_0.537;1314_A_0.581;1409_G_0.577;1438_E_0.647;1532_S_0.565;1557_V_0.581;1595_K_0.543;1604_K_0.580;1608_R_0.580;1628_V_0.554;1646_P_0.602;1654_K_0.552;1679_E_0.538;1697_P_0.582;1721_D_0.571;1723_I_0.592;1775_Q_0.55…	Microtubule-associated protein futsch	Harpegnathos saltator	GO:0000226|microtubule cytoskeleton organization|IEA; GO:0005874|microtubule|IEA; GO:0008017|microtubule binding|IEA
FEX_0000443-mRNA1	F3x4	PositiveSelection	-1354.584036	0.00212	1.00000	0.00212	1.00000	0.00212	1.00000	653.27381	653.27381	85_L_0.612;127_D_1.000**;128_N_0.817;129_V_0.999**;130_D_1.000**;131_C_1.000**;132_W_1.000**;134_Q_0.958*;135_H_0.994**;136_G_1.000**;137_K_0.998**;139_P_1.000**;140_W_0.999**;141_A_0.999**;142_P_0.998**;143_P_1.000**;144_V_0.820;145_S_1.000**;146_G_1.000**;147_I_1.000**;148_V_1.000**;150_L_0.901;151_T_1.000**;152_L_0.999**;153_V_0.948;154_A_1.000**;155_I_0.999**;156_N_1.000**;157_D_0.999**;160_G…	pfam00100, Zona_pellucida, Zona pellucida-like domain	Camponotus floridanus	NA
FEX_0004577-mRNA1	F3x4	PositiveSelection	-1605.489923	0.06450	1.00000	0.06450	1.00000	0.06450	1.00000	8.28756	8.28756	2_N_0.561;17_T_0.517;23_K_0.830;39_D_0.537;44_G_0.808;45_S_0.974*;50_L_0.611;55_K_0.868;68_A_0.823;87_I_0.806;97_W_0.568;109_M_0.963*;113_A_0.830;125_N_0.646;128_R_0.847;141_D_0.793;	Polyamine-modulated factor 1-like protein	Lasius niger	NA
FEX_0004951-mRNA3	F3x4	PositiveSelection	-1583.491601	0.05164	1.00000	0.05164	1.00000	0.05164	1.00000	351.49327	351.49327	81_T_0.996**;	Forkhead box protein F2	Camponotus floridanus	GO:0003677|DNA binding|IEA; GO:0003700|sequence-specific DNA binding transcription factor activity|IEA; GO:0006355|regulation of transcription, DNA-dependent|IEA; GO:0043565|sequence-specific DNA binding|IEA
FEX_0004065-mRNA1	F3x4	PositiveSelection	-3418.617811	0.05167	1.00000	0.05167	1.00000	0.05167	1.00000	163.32147	163.32147	5_Q_0.864;149_I_0.546;156_Y_0.996**;248_V_0.723;251_L_0.818;256_I_0.734;340_S_0.852;371_G_0.974*;372_T_0.991**;373_S_0.975*;374_L_0.989*;375_R_0.825;376_G_0.999**;377_D_0.762;378_I_0.996**;379_N_0.997**;380_V_0.997**;381_C_0.999**;382_I_0.991**;383_V_0.914;384_G_0.839;	DNA helicase	Lasius niger	GO:0000166|nucleotide binding|IEA; GO:0003677|DNA binding|IEA; GO:0003678|DNA helicase activity|IEA; GO:0004386|helicase activity|IEA; GO:0005524|ATP binding|IEA; GO:0005634|nucleus|IEA; GO:0006260|DNA replication|IEA; GO:0006270|DNA-dependent DNA replication initiation|IEA; GO:0015204|urea transmembrane transporter activity|IEA; GO:0016020|membrane|IEA; GO:0016021|integral to membrane|IEA; GO:00…
FEX_0003067-mRNA1	F3x4	PositiveSelection	-6588.082439	0.12863	1.00000	0.12863	1.00000	0.12863	1.00000	149.70226	149.70226	1_M_0.986*;62_G_0.915;	Suppressor of cytokine signaling 2	Lasius niger	GO:0005622|intracellular|IEA; GO:0035556|intracellular signal transduction|IEA
FEX_0003097-mRNA1	F3x4	PositiveSelection	-8903.918492	0.03114	1.00000	0.03114	1.00000	0.03114	1.00000	2.25704	2.25704	203_N_0.538;219_H_0.567;223_D_0.530;239_E_0.519;243_D_0.531;269_S_0.533;284_V_0.594;317_V_0.728;342_P_0.542;351_A_0.971*;514_I_0.925;556_E_0.519;580_G_0.973*;920_R_0.564;1020_H_0.574;	Wash complex subunit 7-like protein	Camponotus floridanus	GO:0071203|WASH complex|IEA
FEX_0003118-mRNA1	F3x4	PositiveSelection	-4290.630093	0.12073	1.00000	0.12073	1.00000	0.12073	1.00000	134.48422	134.48422	161_S_0.959*;312_S_0.980*;	Prp31_C multi-domain protein	Camponotus floridanus	NA
FEX_0001418-mRNA1	F3x4	PositiveSelection	-3584.023850	0.03114	1.00000	0.03114	1.00000	0.03114	1.00000	999.00000	999.00000	1_L_0.996**;2_R_0.997**;3_K_0.972*;4_K_0.992**;5_L_0.871;6_D_0.997**;7_S_0.990**;8_R_0.981*;90_G_0.763;163_L_0.584;198_S_0.999**;236_L_0.666;356_E_0.598;373_E_0.573;	Adenylate cyclase type 3 (Fragment)	Camponotus floridanus	GO:0000166|nucleotide binding|IEA; GO:0005622|intracellular|IEA; GO:0009190|cyclic nucleotide biosynthetic process|IEA; GO:0016020|membrane|IEA; GO:0016021|integral to membrane|IEA; GO:0016829|lyase activity|IEA; GO:0016849|phosphorus-oxygen lyase activity|IEA; GO:0035556|intracellular signal transduction|IEA
FEX_0001415-mRNA2	F3x4	PositiveSelection	-3087.973054	0.07175	1.00000	0.07175	1.00000	0.07175	1.00000	2.41081	2.41081	106_D_0.607;139_L_0.512;146_N_0.969*;153_V_0.503;178_I_0.522;204_L_0.580;	Alpha-tocopherol transfer	Lasius niger	GO:0005215|transporter activity|IEA; GO:0005622|intracellular|IEA; GO:0006810|transport|IEA
FEX_0001416-mRNA1	F3x4	PositiveSelection	-2926.854024	0.09155	1.00000	0.09155	1.00000	0.09155	1.00000	73.11539	73.11539	1_M_0.995**;2_P_0.542;3_Q_0.550;174_S_0.635;222_L_0.566;	Alpha-tocopherol transfer protein-like	Camponotus floridanus	GO:0005215|transporter activity|IEA; GO:0005622|intracellular|IEA; GO:0006810|transport|IEA
FEX_0012691-mRNA1	F3x4	PositiveSelection	-6280.659917	0.04503	1.00000	0.04503	1.00000	0.04503	1.00000	4.78097	4.78097	122_M_0.998**;363_T_0.936;391_I_0.551;405_D_0.561;435_K_0.942;	Dentin sialophospho	Lasius niger	NA
FEX_0011090-mRNA1	F3x4	PositiveSelection	-1775.267299	0.04215	1.00000	0.04215	1.00000	0.04215	1.00000	999.00000	999.00000	78_T_0.739;93_V_0.759;216_R_0.750;217_Y_0.928;218_E_0.842;219_R_0.777;220_H_1.000**;221_I_0.988*;222_V_0.980*;	Cytosolic carboxypeptidase 6	Camponotus floridanus	GO:0004180|carboxypeptidase activity|IEA; GO:0004181|metallocarboxypeptidase activity|IEA; GO:0006508|proteolysis|IEA; GO:0008270|zinc ion binding|IEA
FEX_0005736-mRNA1	F3x4	PositiveSelection	-455.546851	0.02458	1.00000	0.02458	1.00000	0.02458	1.00000	241.83257	241.83257	21_K_0.794;28_C_0.895;31_P_1.000**;33_T_0.920;34_A_0.827;35_K_1.000**;37_K_0.993**;39_I_0.999**;40_I_0.998**;41_H_0.997**;42_K_0.998**;44_T_1.000**;45_E_0.862;	Vacuolar protein sorting-associated protein 13A	Harpegnathos saltator	NA
FEX_0011099-mRNA1	F3x4	PositiveSelection	-2135.350693	0.04774	1.00000	0.04774	1.00000	0.04774	1.00000	159.19734	159.19734	7_A_0.580;57_A_0.663;87_T_0.721;111_T_0.779;112_K_0.853;188_H_0.952*;	pfam00538, Linker_histone, linker histone H1 and H5 family	Linepithema humile	NA
FEX_0011087-mRNA5	F3x4	PositiveSelection	-3175.337135	0.07083	1.00000	0.07083	1.00000	0.07083	1.00000	999.00000	999.00000	109_S_0.518;187_N_0.613;243_D_0.594;306_D_0.998**;307_H_0.977*;308_P_0.984*;309_L_0.933;310_V_0.991**;311_K_0.944;312_A_0.528;313_V_0.996**;314_V_0.983*;316_E_0.947;318_Y_0.969*;319_R_0.580;320_V_0.794;321_T_0.969*;322_A_0.992**;	pfam00076, RRM_1, RNA recognition motif	Lasius niger	NA
FEX_0005688-mRNA1	F3x4	PositiveSelection	-7804.994741	0.00350	1.00000	0.00350	1.00000	0.00350	1.00000	999.00000	999.00000	155_V_0.713;156_P_0.975*;157_I_0.724;	ATP-dependent RNA helicase DHX8	Lasius niger	GO:0000166|nucleotide binding|IEA; GO:0003676|nucleic acid binding|IEA; GO:0004386|helicase activity|IEA; GO:0005524|ATP binding|IEA; GO:0008026|ATP-dependent helicase activity|IEA; GO:0008152|metabolic process|IEA; GO:0016787|hydrolase activity|IEA
FEX_0002985-mRNA5	F3x4	PositiveSelection	-5568.364899	0.02965	1.00000	0.02965	1.00000	0.02965	1.00000	1.60968	1.60968	9_L_0.595;17_E_0.604;24_D_0.565;31_I_0.509;35_Q_0.591;46_A_0.978*;126_E_0.607;139_V_0.550;187_G_0.580;202_I_0.578;209_V_0.635;306_T_0.618;427_V_0.503;599_V_0.503;	Protein bicaudal D	Linepithema humile	GO:0005794|Golgi apparatus|IEA; GO:0006810|transport|IEA
FEX_0009026-mRNA1	F3x4	PositiveSelection	-601.294359	0.03244	1.00000	0.03244	1.00000	0.03244	1.00000	634.78154	634.78154	51_N_0.973*;52_Q_0.984*;53_Q_1.000**;54_V_0.999**;55_G_1.000**;56_L_1.000**;57_M_0.972*;58_L_1.000**;60_R_1.000**;61_N_0.997**;62_L_1.000**;63_Q_1.000**;65_S_1.000**;	ABC transporter G family member	Pogonomyrmex barbatus	GO:0000166|nucleotide binding|IEA; GO:0005524|ATP binding|IEA; GO:0006810|transport|IEA; GO:0008152|metabolic process|IEA; GO:0016020|membrane|IEA; GO:0016021|integral to membrane|IEA; GO:0016887|ATPase activity|IEA
FEX_0009448-mRNA1	F3x4	PositiveSelection	-3775.019964	0.02448	1.00000	0.02448	1.00000	0.02448	1.00000	9.31349	9.31349	52_E_0.951*;	Tetratricopeptide repeat protein 26	Camponotus floridanus	GO:0000166|nucleotide binding|IEA; GO:0003676|nucleic acid binding|IEA
FEX_0002774-mRNA1	F3x4	PositiveSelection	-4310.021666	0.00581	1.00000	0.00581	1.00000	0.00581	1.00000	44.60149	44.60149	3_S_0.524;77_S_0.977*;463_A_0.520;534_A_0.563;	PREDICTED: pre-mRNA-processing factor 6	Camponotus floridanus	NA
FEX_0005558-mRNA1	F3x4	PositiveSelection	-2406.215048	0.09073	1.00000	0.09073	1.00000	0.09073	1.00000	319.83568	319.83568	3_Q_0.620;16_R_0.525;44_L_0.614;80_A_0.969*;	Cytochrome P450 4C1	Camponotus floridanus	GO:0004497|monooxygenase activity|IEA; GO:0005506|iron ion binding|IEA; GO:0016491|oxidoreductase activity|IEA; GO:0016705|oxidoreductase activity, acting on paired donors, with incorporation or reduction of molecular oxygen|IEA; GO:0020037|heme binding|IEA; GO:0046872|metal ion binding|IEA; GO:0055114|oxidation-reduction process|IEA
FEX_0006660-mRNA1	F3x4	PositiveSelection	-1822.164821	0.02322	1.00000	0.02322	1.00000	0.02322	1.00000	7.96629	7.96629	1_E_0.513;44_T_0.550;137_G_0.989*;144_G_0.511;	Autophagy-related protein 16-1	Solenopsis invicta	NA
FEX_0007230-mRNA1	F3x4	PositiveSelection	-2149.811556	0.07566	1.00000	0.07566	1.00000	0.07566	1.00000	81.88645	81.88645	1_E_0.858;2_K_0.787;33_N_0.935;36_G_0.855;41_V_0.765;60_V_0.900;68_V_0.997**;72_H_0.812;93_V_0.569;146_L_0.659;153_S_0.991**;	Neurofilament heavy polypeptide	Lasius niger	NA
FEX_0003331-mRNA1	F3x4	PositiveSelection	-592.002528	0.09135	1.00000	0.09135	1.00000	0.09135	1.00000	20.64495	20.64495	19_G_0.684;37_F_0.522;40_T_0.510;48_D_0.767;57_T_0.893;58_H_0.982*;59_F_0.994**;	pfam02390, Methyltransf_4, Putative methyltransferase	Camponotus floridanus	NA
FEX_0002287-mRNA1	F3x4	PositiveSelection	-2021.588721	0.02840	1.00000	0.02840	1.00000	0.02840	1.00000	397.55237	397.55237	1_P_0.993**;2_M_0.999**;3_I_0.963*;4_S_0.799;5_G_0.906;6_L_0.554;7_Q_0.987*;8_H_0.999**;9_T_0.965*;10_S_0.821;12_T_0.998**;13_P_0.996**;14_P_0.999**;15_G_0.593;	Serine/threonine-protein kinase receptor	Solenopsis invicta	GO:0000166|nucleotide binding|IEA; GO:0004672|protein kinase activity|IEA; GO:0004674|protein serine/threonine kinase activity|IEA; GO:0004675|transmembrane receptor protein serine/threonine kinase activity|IEA; GO:0004702|receptor signaling protein serine/threonine kinase activity|IEA; GO:0005524|ATP binding|IEA; GO:0006468|protein phosphorylation|IEA; GO:0007178|transmembrane receptor protein s…
FEX_0002285-mRNA1	F3x4	PositiveSelection	-4235.362771	0.05082	1.00000	0.05082	1.00000	0.05082	1.00000	999.00000	999.00000	42_S_0.683;222_P_0.563;234_E_0.564;248_S_0.897;258_S_0.682;289_S_0.688;433_I_0.747;454_A_0.880;455_M_0.854;456_F_0.997**;457_T_1.000**;458_I_0.898;459_P_0.997**;460_E_0.999**;461_G_0.996**;462_Q_0.971*;463_S_0.998**;464_F_0.906;465_W_0.908;466_Q_0.978*;468_F_0.905;469_S_0.997**;470_D_0.604;472_V_1.000**;473_V_0.827;474_H_0.997**;475_F_0.913;476_K_0.997**;477_K_0.953*;478_K_0.998**;480_F_0.907;481…	Hepatoma-derived growth factor	Lasius niger	NA
FEX_0012476-mRNA1	F3x4	PositiveSelection	-3108.863864	0.00094	1.00000	0.00094	1.00000	0.00094	1.00000	563.43226	563.43226	398_E_0.904;399_K_0.987*;401_G_0.999**;403_Q_0.916;404_A_0.768;405_L_0.994**;406_P_0.996**;407_W_0.999**;408_V_0.996**;410_Y_1.000**;412_T_0.990**;413_Q_0.999**;414_N_0.993**;416_D_1.000**;417_Y_0.997**;418_Q_0.999**;	AP-1 complex subunit mu-1	Harpegnathos saltator	GO:0006810|transport|IEA; GO:0006886|intracellular protein transport|IEA; GO:0015031|protein transport|IEA; GO:0016020|membrane|IEA; GO:0016192|vesicle-mediated transport|IEA; GO:0030131|clathrin adaptor complex|IEA
FEX_0004558-mRNA1	F3x4	PositiveSelection	-9018.141063	0.10975	1.00000	0.10975	1.00000	0.10975	1.00000	18.38082	18.38082	35_E_0.674;468_V_0.893;596_K_0.992**;599_L_0.809;615_M_0.946;624_E_0.726;625_V_0.836;628_A_0.868;635_I_0.507;672_E_0.775;679_K_0.529;688_N_0.566;689_D_0.526;701_E_0.728;711_Q_0.796;712_G_0.730;713_R_0.973*;716_E_0.872;729_R_0.520;746_N_0.894;	Tyrosine-protein kinase	Camponotus floridanus	GO:0000166|nucleotide binding|IEA; GO:0004672|protein kinase activity|IEA; GO:0004713|protein tyrosine kinase activity|IEA; GO:0004715|non-membrane spanning protein tyrosine kinase activity|IEA; GO:0005524|ATP binding|IEA; GO:0005856|cytoskeleton|IEA; GO:0006468|protein phosphorylation|IEA; GO:0016301|kinase activity|IEA; GO:0016310|phosphorylation|IEA; GO:0016740|transferase activity|IEA; GO:001…
FEX_0012275-mRNA1	F3x4	PositiveSelection	-2231.466967	0.05780	1.00000	0.05780	1.00000	0.05780	1.00000	45.01029	45.01029	1_I_0.830;2_L_0.819;146_K_0.998**;	Adenylyltransferase and sulfurtransferase MOCS3	Camponotus floridanus	GO:0000166|nucleotide binding|IEA; GO:0002098|tRNA wobble uridine modification|IEA; GO:0002143|tRNA wobble position uridine thiolation|IEA; GO:0003824|catalytic activity|IEA; GO:0004792|thiosulfate sulfurtransferase activity|IEA; GO:0005524|ATP binding|IEA; GO:0005737|cytoplasm|IEA; GO:0005829|cytosol|IEA; GO:0006777|Mo-molybdopterin cofactor biosynthetic process|IEA; GO:0008033|tRNA processing|I…
FEX_0010169-mRNA1	F3x4	PositiveSelection	-788.475085	0.02303	1.00000	0.02303	1.00000	0.02303	1.00000	999.00000	999.00000	62_R_0.999**;82_I_0.997**;83_T_0.999**;84_V_1.000**;85_H_0.998**;86_C_1.000**;87_L_0.987*;88_G_0.989*;89_D_0.977*;90_E_0.999**;91_A_1.000**;92_T_0.988*;93_L_0.973*;94_R_0.999**;95_R_1.000**;96_W_0.999**;97_L_0.994**;98_V_0.999**;99_Y_1.000**;100_D_0.980*;102_R_0.999**;103_Q_0.999**;104_R_1.000**;105_V_1.000**;	Rhomboid-like protein	Harpegnathos saltator	GO:0004252|serine-type endopeptidase activity|IEA; GO:0006508|proteolysis|IEA; GO:0008233|peptidase activity|IEA; GO:0016020|membrane|IEA; GO:0016021|integral to membrane|IEA; GO:0016787|hydrolase activity|IEA
FEX_0012257-mRNA1	F3x4	PositiveSelection	-8133.207223	0.02579	1.00000	0.02579	1.00000	0.02579	1.00000	370.84864	370.84864	11_L_0.763;89_V_0.690;146_G_0.699;196_E_0.752;219_A_0.641;272_L_0.770;324_V_0.620;654_R_0.678;666_T_0.797;739_T_0.640;769_L_0.750;953_V_0.997**;954_M_1.000**;955_S_0.991**;956_R_0.993**;958_G_0.747;959_R_0.999**;960_R_0.999**;961_R_0.986*;965_L_0.955*;967_S_0.712;969_E_0.632;970_V_0.832;971_M_0.640;972_R_0.999**;973_H_0.924;975_R_0.756;976_D_0.681;977_K_0.961*;979_D_0.998**;980_S_0.888;982_L_0.99…	Niemann-Pick C1 protein	Vollenhovia emeryi	GO:0007165|signal transduction|IEA; GO:0008158|hedgehog receptor activity|IEA; GO:0016020|membrane|IEA; GO:0016021|integral to membrane|IEA; GO:0030301|cholesterol transport|IEA
FEX_0002069-mRNA1	F3x4	PositiveSelection	-10770.338306	0.04817	1.00000	0.04817	1.00000	0.04817	1.00000	2.57077	2.57077	31_D_0.604;100_Q_0.596;106_S_0.609;131_S_0.614;164_P_0.638;193_V_0.614;204_G_0.962*;387_V_0.613;485_M_0.595;493_A_0.613;558_E_0.599;618_S_0.650;742_M_0.511;826_S_0.611;908_V_0.612;1021_R_0.619;1036_K_0.608;1154_A_0.612;	BCL-6 corepressor	Camponotus floridanus	NA
FEX_0004906-mRNA1	F3x4	PositiveSelection	-4184.833470	0.02490	1.00000	0.02490	1.00000	0.02490	1.00000	999.00000	999.00000	32_D_0.517;259_W_0.749;268_K_0.528;284_G_0.985*;398_S_0.582;520_P_0.586;547_Y_0.999**;548_V_0.999**;549_I_0.996**;550_T_0.958*;	Exocyst complex component 3	Lasius niger	GO:0000145|exocyst|IEA; GO:0006887|exocytosis|IEA
FEX_0012265-mRNA1	F3x4	PositiveSelection	-2548.744575	0.01199	1.00000	0.01199	1.00000	0.01199	1.00000	6.15743	6.15743	110_K_0.711;114_E_0.634;129_E_0.734;134_P_0.705;136_S_0.979*;138_Y_0.764;170_K_0.614;176_S_0.673;194_F_0.713;195_Y_0.700;203_A_0.584;255_Y_0.718;	Sodium/potassium-transporting ATPase subunit beta-2	Camponotus floridanus	GO:0005890|sodium:potassium-exchanging ATPase complex|IEA; GO:0006813|potassium ion transport|IEA; GO:0006814|sodium ion transport|IEA; GO:0016020|membrane|IEA; GO:0016021|integral to membrane|IEA
FEX_0009271-mRNA3	F3x4	PositiveSelection	-2785.646810	0.00000	1.00000	0.00000	1.00000	0.00000	1.00000	910.68729	910.68729	1_L_0.993**;2_R_0.934;3_D_0.999**;4_D_0.995**;5_E_0.994**;6_D_0.999**;9_D_0.994**;10_V_0.985*;11_T_0.910;12_F_0.983*;14_C_0.994**;15_D_0.925;16_G_0.984*;18_R_0.999**;19_L_0.993**;20_Q_0.994**;21_A_0.910;22_H_0.999**;23_K_0.994**;24_V_0.994**;25_V_0.994**;26_L_0.917;27_S_0.994**;28_A_0.922;30_S_0.999**;31_P_0.908;32_Y_0.914;33_F_0.986*;36_L_0.981*;37_F_0.917;38_K_0.995**;244_P_0.919;353_A_0.906;	Broad-complex core protein isoform 6	Lasius niger	GO:0003676|nucleic acid binding|IEA; GO:0046872|metal ion binding|IEA
FEX_0010654-mRNA1	F3x4	PositiveSelection	-2631.657808	0.05790	1.00000	0.05790	1.00000	0.05790	1.00000	80.37462	80.37462	41_I_0.639;174_K_0.999**;175_K_0.784;176_V_0.707;189_K_0.999**;201_E_0.743;222_P_0.766;256_S_0.966*;259_R_0.958*;260_S_0.814;266_V_0.691;	Sodium/potassium-transporting ATPase subunit beta-2	Wasmannia auropunctata	GO:0005890|sodium:potassium-exchanging ATPase complex|IEA; GO:0006813|potassium ion transport|IEA; GO:0006814|sodium ion transport|IEA; GO:0016020|membrane|IEA; GO:0016021|integral to membrane|IEA
FEX_0004903-mRNA1	F3x4	PositiveSelection	-1983.682444	0.03149	1.00000	0.03149	1.00000	0.03149	1.00000	53.74525	53.74525	122_T_0.611;233_A_0.566;240_S_0.747;250_V_0.570;254_N_0.636;260_A_0.656;261_G_0.932;262_E_0.716;263_V_0.797;264_V_0.991**;265_A_0.985*;266_E_0.986*;267_L_0.923;268_Q_0.999**;269_E_1.000**;270_E_0.986*;	Oxysterol_BP multi-domain protein	Camponotus floridanus	NA
FEX_0003370-mRNA3	F3x4	PositiveSelection	-3833.596331	0.04993	1.00000	0.04993	1.00000	0.04993	1.00000	13.06229	13.06229	205_I_0.556;228_V_0.742;242_S_0.765;291_H_0.754;382_L_0.958*;391_A_0.776;393_T_0.711;	Transcription initiation factor TFIID subunit 4	Camponotus floridanus	GO:0003700|sequence-specific DNA binding transcription factor activity|IEA; GO:0003743|translation initiation factor activity|IEA; GO:0005669|transcription factor TFIID complex|IEA; GO:0006352|transcription initiation, DNA-dependent|IEA; GO:0006355|regulation of transcription, DNA-dependent|IEA; GO:0006413|translational initiation|IEA; GO:0046982|protein heterodimerization activity|IEA
FEX_0003374-mRNA3	F3x4	PositiveSelection	-2377.825500	0.05446	1.00000	0.05446	1.00000	0.05446	1.00000	4.53033	4.53033	36_G_0.513;137_L_0.581;146_P_0.625;151_V_0.973*;203_Q_0.587;	Cold shock domain-containing protein E1	Camponotus floridanus	GO:0003676|nucleic acid binding|IEA; GO:0003677|DNA binding|IEA; GO:0006355|regulation of transcription, DNA-dependent|IEA
FEX_0008569-mRNA1	F3x4	PositiveSelection	-2094.080663	0.00152	1.00000	0.00152	1.00000	0.00152	1.00000	20.81204	20.81204	326_S_0.950*;	RNA-binding protein Nova-1	Camponotus floridanus	GO:0003676|nucleic acid binding|IEA; GO:0003723|RNA binding|IEA
FEX_0008128-mRNA1	F3x4	PositiveSelection	-9630.157206	0.07079	1.00000	0.07079	1.00000	0.07079	1.00000	9.07015	9.07015	56_R_0.671;71_V_0.756;199_P_0.586;208_S_0.625;249_H_0.707;253_L_0.629;256_T_0.672;318_K_0.672;336_I_0.526;457_S_0.528;508_A_0.677;515_S_0.686;516_K_0.971*;534_C_0.750;583_L_0.911;587_E_0.650;590_K_0.636;594_E_0.559;721_D_0.998**;773_Q_0.686;809_T_0.676;813_E_0.560;841_S_0.664;877_D_0.690;	Kinesin-like protein	Lasius niger	GO:0000166|nucleotide binding|IEA; GO:0003777|microtubule motor activity|IEA; GO:0005524|ATP binding|IEA; GO:0005871|kinesin complex|IEA; GO:0005874|microtubule|IEA; GO:0007018|microtubule-based movement|IEA; GO:0008017|microtubule binding|IEA; GO:0008152|metabolic process|IEA
FEX_0003222-mRNA1	F3x4	PositiveSelection	-878.929002	0.05133	1.00000	0.05133	1.00000	0.05133	1.00000	999.00000	999.00000	102_G_0.617;105_T_0.975*;106_P_0.998**;107_I_0.989*;108_Q_0.956*;109_T_0.997**;110_P_0.998**;111_V_0.901;112_E_0.868;	Synaptotagmin-11	Cerapachys biroi	GO:0016020|membrane|IEA; GO:0016021|integral to membrane|IEA
FEX_0009979-mRNA1	F3x4	PositiveSelection	-2671.076387	0.04779	1.00000	0.04779	1.00000	0.04779	1.00000	3.33288	3.33288	12_V_0.665;19_H_0.652;119_D_0.550;128_T_0.742;129_I_0.611;173_K_0.555;187_E_0.759;188_S_0.522;202_E_0.993**;204_N_0.573;207_D_0.712;249_R_0.591;	Dna mismatch repair protein mlh1	Lasius niger	GO:0005524|ATP binding|IEA; GO:0006298|mismatch repair|IEA; GO:0030983|mismatched DNA binding|IEA
FEX_0011633-mRNA1	F3x4	PositiveSelection	-1905.921120	0.03214	1.00000	0.03214	1.00000	0.03214	1.00000	32.39673	32.39673	14_T_0.993**;216_Y_0.650;	Octopamine receptor beta-1R	Camponotus floridanus	GO:0004871|signal transducer activity|IEA; GO:0004930|G-protein coupled receptor activity|IEA; GO:0007165|signal transduction|IEA; GO:0007186|G-protein coupled receptor signaling pathway|IEA; GO:0016020|membrane|IEA; GO:0016021|integral to membrane|IEA
FEX_0010460-mRNA1	F3x4	PositiveSelection	-2454.461421	0.04737	1.00000	0.04737	1.00000	0.04737	1.00000	29.86804	29.86804	130_G_0.830;151_V_0.982*;183_R_0.992**;	1,4-alpha-glucan-branching enzyme	Lasius niger	GO:0003824|catalytic activity|IEA; GO:0003844|1,4-alpha-glucan branching enzyme activity|IEA; GO:0004553|hydrolase activity, hydrolyzing O-glycosyl compounds|IEA; GO:0005975|carbohydrate metabolic process|IEA; GO:0005978|glycogen biosynthetic process|IEA; GO:0043169|cation binding|IEA
FEX_0001903-mRNA1	F3x4	PositiveSelection	-4373.087746	0.06905	1.00000	0.06905	1.00000	0.06905	1.00000	3.70477	3.70477	66_F_0.706;75_N_0.702;106_V_0.740;128_A_0.983*;157_L_0.644;175_I_0.590;177_S_0.740;248_G_0.567;259_E_0.546;272_V_0.506;275_E_0.628;309_S_0.653;333_D_0.628;395_V_0.968*;417_A_0.725;436_A_0.604;465_A_0.599;466_V_0.649;	E3 ufm1-protein ligase 1-like protein	Lasius niger	GO:0008152|metabolic process|IEA; GO:0016874|ligase activity|IEA
FEX_0007483-mRNA1	F3x4	PositiveSelection	-1640.202125	0.00000	1.00000	0.00000	1.00000	0.00000	1.00000	999.00000	999.00000	238_G_0.711;239_F_0.984*;	Protein transport protein Sec61 subunit alpha-like 1	Acromyrmex echinatior	GO:0006810|transport|IEA; GO:0015031|protein transport|IEA; GO:0016020|membrane|IEA; GO:0016021|integral to membrane|IEA
FEX_0007512-mRNA1	F3x4	PositiveSelection	-3819.593597	0.05879	1.00000	0.05879	1.00000	0.05879	1.00000	998.99889	998.99889	22_G_0.909;137_Y_0.561;151_G_0.782;156_Y_0.971*;270_I_0.543;377_L_0.605;	STOP domain containing protein	Camponotus floridanus	NA
FEX_0005147-mRNA1	F3x4	PositiveSelection	-1966.595893	0.02017	1.00000	0.02017	1.00000	0.02017	1.00000	106.99734	106.99734	4_E_0.614;241_Q_0.663;243_H_0.921;244_Q_0.577;245_S_0.997**;246_Q_0.858;	E3 ubiquitin-protein ligase MARCH6	Lasius niger	GO:0008152|metabolic process|IEA; GO:0008270|zinc ion binding|IEA; GO:0016020|membrane|IEA; GO:0016021|integral to membrane|IEA; GO:0016874|ligase activity|IEA
FEX_0010179-mRNA1	F3x4	PositiveSelection	-2509.807207	0.01422	1.00000	0.01422	1.00000	0.01422	1.00000	10.92781	10.92781	75_G_0.562;137_L_0.590;177_G_0.952*;241_L_0.809;298_P_0.583;	alpha-1,2-Mannosidase	Acromyrmex echinatior	GO:0004571|mannosyl-oligosaccharide 1,2-alpha-mannosidase activity|IEA; GO:0005509|calcium ion binding|IEA; GO:0008152|metabolic process|IEA; GO:0016020|membrane|IEA; GO:0016021|integral to membrane|IEA; GO:0016787|hydrolase activity|IEA; GO:0016798|hydrolase activity, acting on glycosyl bonds|IEA
FEX_0010510-mRNA1	F3x4	PositiveSelection	-4668.075235	0.05806	1.00000	0.05806	1.00000	0.05806	1.00000	6.32302	6.32302	98_A_0.545;122_A_0.958*;142_I_0.501;161_G_0.504;191_S_0.517;250_A_0.561;260_A_0.573;392_L_0.555;502_F_0.528;	Solute carrier family 22 member 3	Lasius niger	GO:0005215|transporter activity|IEA; GO:0016020|membrane|IEA; GO:0016021|integral to membrane|IEA; GO:0022857|transmembrane transporter activity|IEA; GO:0055085|transmembrane transport|IEA
FEX_0000932-mRNA1	F3x4	PositiveSelection	-1223.797241	0.06468	1.00000	0.06468	1.00000	0.06468	1.00000	4.88004	4.88004	25_Y_0.537;34_Y_0.631;76_L_0.650;78_T_0.745;80_R_0.980*;	Unassigned protein	Camponotus floridanus	NA
FEX_0001760-mRNA1	F3x4	PositiveSelection	-3665.449563	0.02979	1.00000	0.02979	1.00000	0.02979	1.00000	999.00000	999.00000	1_N_0.801;3_S_0.903;4_N_0.761;6_S_0.805;8_K_0.826;9_Q_0.875;11_D_0.786;88_K_0.581;106_R_0.625;108_R_0.646;110_R_0.646;134_E_0.611;144_P_0.832;184_E_0.656;185_T_0.735;233_V_0.734;336_R_0.714;339_M_0.941;358_T_0.710;362_S_0.599;364_D_0.589;369_D_0.522;370_G_0.807;396_A_0.774;397_S_0.859;399_I_0.999**;401_S_0.996**;402_S_0.999**;403_D_0.522;405_E_0.998**;406_G_1.000**;408_D_0.649;409_I_1.000**;	Another transcription unit protein	Lasius niger	GO:0006368|transcription elongation from RNA polymerase II promoter|IEA; GO:0016570|histone modification|IEA; GO:0016593|Cdc73/Paf1 complex|IEA
FEX_0006000-mRNA1	F3x4	PositiveSelection	-1652.108003	0.04859	1.00000	0.04859	1.00000	0.04859	1.00000	49.28939	49.28939	8_A_0.903;11_K_0.804;12_K_0.995**;13_K_0.834;14_E_0.822;41_K_0.738;46_K_0.574;47_T_0.782;48_L_0.956*;49_I_0.954*;51_A_0.998**;52_Q_0.507;59_R_0.836;60_N_0.642;61_K_0.681;76_V_0.896;80_M_0.567;98_M_0.549;114_R_0.942;118_M_0.987*;150_G_0.999**;151_R_0.997**;152_R_0.998**;153_I_0.944;154_R_0.999**;156_P_0.999**;	Mitochondrial inner membrane protease ATP23-like protein	Camponotus floridanus	GO:0004222|metalloendopeptidase activity|IEA; GO:0006508|proteolysis|IEA; GO:0008233|peptidase activity|IEA
FEX_0004794-mRNA1	F3x4	PositiveSelection	-1977.013070	0.03522	1.00000	0.03522	1.00000	0.03522	1.00000	999.00000	999.00000	158_E_0.563;188_V_0.535;252_L_0.971*;253_F_0.968*;254_P_0.813;259_G_0.698;260_T_0.813;	Regulating synaptic membrane exocytosis protein 1-like isoform x1 protein	Camponotus floridanus	NA
FEX_0013378-mRNA1	F3x4	PositiveSelection	-2058.681087	0.02104	1.00000	0.02104	1.00000	0.02104	1.00000	998.99873	998.99873	18_S_0.669;34_G_0.955*;41_G_0.504;173_V_0.531;	pfam03103, DUF243, Domain of unknown function (DUF243)	Camponotus floridanus	NA
FEX_0008016-mRNA1	F3x4	PositiveSelection	-4223.545032	0.08752	1.00000	0.08752	1.00000	0.08752	1.00000	7.00806	7.00806	22_S_0.732;33_L_0.663;77_N_0.503;108_Y_0.540;151_R_0.969*;156_I_0.991**;165_T_0.634;168_T_0.763;171_F_0.986*;201_T_0.643;209_P_0.731;313_K_0.505;358_P_0.738;	Protein maelstrom-like protein	Camponotus floridanus	NA
FEX_0004787-mRNA2	F3x4	PositiveSelection	-7367.761034	0.06692	1.00000	0.06692	1.00000	0.06692	1.00000	7.01976	7.01976	55_L_0.952*;62_I_0.625;68_F_0.619;188_C_0.668;271_K_0.975*;301_S_0.641;315_R_0.648;454_Y_0.579;491_S_0.658;553_K_0.575;583_K_0.535;660_G_0.971*;	Cap-specific mrna nucleoside-2-o-methyltransferase 1-like protein	Lasius niger	GO:0003676|nucleic acid binding|IEA; GO:0004483|mRNA (nucleoside-2'-O-)-methyltransferase activity|IEA; GO:0006370|mRNA capping|IEA; GO:0008168|methyltransferase activity|IEA; GO:0016740|transferase activity|IEA; GO:0032259|methylation|IEA; GO:0080009|mRNA methylation|IEA
FEX_0008289-mRNA1	F3x4	PositiveSelection	-4480.035324	0.03199	1.00000	0.03199	1.00000	0.03199	1.00000	43.52580	43.52580	369_E_0.520;421_P_0.986*;437_A_0.554;534_T_0.502;	Vam6/Vps39-like protein	Camponotus floridanus	GO:0005622|intracellular|IEA; GO:0006886|intracellular protein transport|IEA; GO:0016192|vesicle-mediated transport|IEA
FEX_0008388-mRNA1	F3x4	PositiveSelection	-1704.980746	0.05465	1.00000	0.05465	1.00000	0.05465	1.00000	998.99996	998.99996	38_L_0.967*;128_A_0.589;	SSU rRNA; Eukaryota;Opisthokonta;Holozoa;Metazoa (Animalia);Eumetazoa;Bilateria;Arthropoda;Hexapoda;Insecta ;Pterygota;Neoptera;Hymenoptera;Apis mellifera (honey bee)	Camponotus floridanus	NA
FEX_0008387-mRNA1	F3x4	PositiveSelection	-653.858193	0.00503	1.00000	0.00503	1.00000	0.00503	1.00000	90.44207	90.44207	107_T_0.992**;108_F_0.718;	Ubiquitin-conjugating enzyme E2-24 kDa	Vollenhovia emeryi	GO:0000166|nucleotide binding|IEA; GO:0005524|ATP binding|IEA; GO:0008152|metabolic process|IEA; GO:0016874|ligase activity|IEA
FEX_0009845-mRNA1	F3x4	PositiveSelection	-2460.390625	0.02023	1.00000	0.02023	1.00000	0.02023	1.00000	8.22056	8.22056	100_S_0.976*;101_E_0.582;128_H_0.694;134_Q_0.650;138_G_0.653;227_G_0.644;	PREDICTED: UPF0183 protein CG7083 isoform X1	Camponotus floridanus	NA
FEX_0009847-mRNA1	F3x4	PositiveSelection	-1600.661179	0.06967	1.00000	0.06967	1.00000	0.06967	1.00000	136.41222	136.41222	39_D_0.844;45_D_0.605;49_V_0.921;87_I_0.730;101_D_0.814;125_Q_0.528;136_N_0.857;157_E_1.000**;158_S_0.936;159_G_1.000**;160_V_0.680;161_W_0.998**;162_F_0.993**;163_I_0.824;164_D_0.683;165_L_0.936;167_N_0.984*;	Hydroxysteroid dehydrogenase-like protein 2	Camponotus floridanus	GO:0008152|metabolic process|IEA; GO:0016491|oxidoreductase activity|IEA; GO:0055114|oxidation-reduction process|IEA
FEX_0013178-mRNA1	F3x4	PositiveSelection	-3685.951012	0.06995	1.00000	0.06995	1.00000	0.06995	1.00000	3.12662	3.12662	17_I_0.678;26_E_0.653;32_S_0.696;88_K_0.983*;90_V_0.660;175_K_0.662;260_H_0.715;275_C_0.713;337_V_0.665;411_I_0.666;	Acyl-CoA synthetase short-chain family member 3, mitochondrial	Camponotus floridanus	GO:0003824|catalytic activity|IEA; GO:0008152|metabolic process|IEA
FEX_0013205-mRNA1	F3x4	PositiveSelection	-1138.437472	0.02923	1.00000	0.02923	1.00000	0.02923	1.00000	999.00000	999.00000	1_D_1.000**;2_A_0.994**;3_T_0.999**;4_G_1.000**;5_N_1.000**;7_V_0.993**;8_L_0.998**;9_L_0.999**;10_A_1.000**;11_G_0.993**;26_T_0.526;46_N_0.991**;58_T_0.972*;121_E_0.999**;122_N_0.994**;123_S_1.000**;124_E_0.989*;125_D_0.993**;126_Q_1.000**;128_L_1.000**;129_R_0.993**;130_I_0.999**;131_F_0.994**;132_K_1.000**;	WD repeat-containing protein 59	Camponotus floridanus	NA
FEX_0005813-mRNA1	F3x4	PositiveSelection	-1343.705562	0.05031	1.00000	0.05031	1.00000	0.05031	1.00000	999.00000	999.00000	6_V_0.515;118_D_0.768;121_D_0.832;122_G_0.971*;123_V_0.723;125_D_0.847;126_F_0.822;127_P_0.874;128_S_0.957*;129_I_0.970*;130_P_0.997**;131_S_0.659;132_I_0.791;133_P_0.999**;134_A_0.966*;135_T_0.709;	Lim domain-binding protein (Fragment)	Lasius niger	NA
FEX_0011901-mRNA3	F3x4	PositiveSelection	-2250.939741	0.02829	1.00000	0.02829	1.00000	0.02829	1.00000	111.19180	111.19180	241_G_0.938;242_Q_0.995**;243_S_0.543;246_T_0.999**;247_Q_0.995**;	DNA-binding protein P3A2	Camponotus floridanus	GO:0003677|DNA binding|IEA
FEX_0011770-mRNA1	F3x4	PositiveSelection	-4762.672614	0.02415	1.00000	0.02415	1.00000	0.02415	1.00000	38.10847	38.10847	145_V_0.515;241_A_0.957*;	Monocarboxylate transporter 14	Camponotus floridanus	GO:0016020|membrane|IEA; GO:0016021|integral to membrane|IEA; GO:0055085|transmembrane transport|IEA
FEX_0008140-mRNA2	F3x4	PositiveSelection	-1715.114365	0.03271	1.00000	0.03271	1.00000	0.03271	1.00000	998.99640	998.99640	1_A_0.972*;5_S_0.701;6_R_0.714;	Protein Star	Camponotus floridanus	GO:0016020|membrane|IEA; GO:0016021|integral to membrane|IEA
FEX_0008137-mRNA1	F3x4	PositiveSelection	-2694.837390	0.04071	1.00000	0.04071	1.00000	0.04071	1.00000	62.05597	62.05597	34_Y_0.728;72_V_0.629;216_A_0.726;226_R_0.670;305_G_0.689;306_D_0.979*;307_S_0.943;309_N_0.990**;	Methenyltetrahydrofolate synthetase domain-containing protein	Lasius niger	NA
FEX_0008143-mRNA1	F3x4	PositiveSelection	-2799.565148	0.10521	1.00000	0.10521	1.00000	0.10521	1.00000	22.78711	22.78711	3_E_0.986*;4_S_0.986*;6_Y_0.969*;9_L_0.993**;10_G_0.864;139_E_0.969*;178_A_0.778;245_L_0.740;	Solute carrier family 2, facilitated glucose transporter member 8 (Fragment)	Vollenhovia emeryi	GO:0006810|transport|IEA; GO:0008643|carbohydrate transport|IEA; GO:0016020|membrane|IEA; GO:0016021|integral to membrane|IEA; GO:0022857|transmembrane transporter activity|IEA; GO:0022891|substrate-specific transmembrane transporter activity|IEA; GO:0055085|transmembrane transport|IEA
FEX_0001283-mRNA1	F3x4	PositiveSelection	-2795.410630	0.02763	1.00000	0.02763	1.00000	0.02763	1.00000	998.99937	998.99937	262_A_0.907;263_V_0.999**;264_T_0.998**;265_L_1.000**;266_R_0.899;267_A_0.909;268_G_0.786;269_G_0.997**;270_C_0.997**;272_L_0.999**;276_Y_0.900;277_P_0.900;278_S_0.902;279_G_0.998**;280_V_0.917;281_V_1.000**;282_Y_0.900;283_D_0.999**;284_L_0.986*;286_E_1.000**;289_S_0.999**;290_T_0.999**;291_H_0.992**;292_L_0.999**;293_D_0.997**;294_K_0.835;295_S_0.997**;296_G_0.999**;297_F_0.999**;298_T_1.000**;…	Integrator complex subunit 9	Camponotus floridanus	GO:0016180|snRNA processing|IEA; GO:0032039|integrator complex|IEA
FEX_0001288-mRNA1	F3x4	PositiveSelection	-1358.332166	0.05470	1.00000	0.05470	1.00000	0.05470	1.00000	699.32794	699.32794	10_K_0.972*;18_L_0.614;32_S_0.833;88_V_0.562;104_M_0.957*;105_L_0.754;106_E_0.979*;108_P_0.768;110_P_0.998**;112_T_0.792;113_I_0.999**;114_C_0.986*;115_L_0.970*;116_R_0.999**;118_T_0.999**;	Domain-containing mitochondrial	Camponotus floridanus	GO:0003725|double-stranded RNA binding|IEA
FEX_0012246-mRNA1	F3x4	PositiveSelection	-1066.957183	0.00000	1.00000	0.00000	1.00000	0.00000	1.00000	405.64913	405.64913	2_R_0.579;3_L_0.972*;8_F_0.987*;9_F_0.928;11_K_0.900;12_S_0.802;34_A_0.502;35_S_0.692;48_T_0.935;56_S_0.984*;71_I_0.713;77_Q_0.726;79_D_0.842;	Dnaj-like subfamily c member 17-like protein	Lasius niger	GO:0000166|nucleotide binding|IEA; GO:0003676|nucleic acid binding|IEA
FEX_0007975-mRNA1	F3x4	PositiveSelection	-6629.080908	0.06006	1.00000	0.06006	1.00000	0.06006	1.00000	2.26087	2.26087	191_S_0.593;270_A_0.939;360_V_0.957*;409_G_0.539;	Leucine-rich repeat-containing protein 24-like isoform x1 protein	Lasius niger	GO:0016020|membrane|IEA; GO:0016021|integral to membrane|IEA
FEX_0010783-mRNA4	F3x4	PositiveSelection	-5386.587873	0.07576	1.00000	0.07576	1.00000	0.07576	1.00000	126.79045	126.79045	58_P_0.500;135_P_0.646;497_A_0.640;543_G_0.653;655_I_0.980*;656_C_0.995**;657_H_0.996**;658_T_0.982*;659_C_0.677;660_G_0.808;	Wilms tumor protein 1-interacting protein-like protein	Camponotus floridanus	GO:0008270|zinc ion binding|IEA; GO:0046872|metal ion binding|IEA
FEX_0004995-mRNA2	F3x4	PositiveSelection	-6006.193467	0.05363	1.00000	0.05363	1.00000	0.05363	1.00000	245.49995	245.49995	100_V_0.541;103_T_0.629;405_K_0.559;410_G_0.629;465_R_0.532;591_S_0.568;638_L_0.532;701_S_0.536;720_A_0.508;721_V_0.736;723_S_0.930;724_P_0.656;725_L_0.994**;727_P_0.663;728_R_0.924;	Dual serine/threonine and tyrosine protein kinase	Lasius niger	GO:0000166|nucleotide binding|IEA; GO:0004672|protein kinase activity|IEA; GO:0004674|protein serine/threonine kinase activity|IEA; GO:0005524|ATP binding|IEA; GO:0006468|protein phosphorylation|IEA; GO:0016301|kinase activity|IEA; GO:0016310|phosphorylation|IEA
FEX_0008197-mRNA1	F3x4	PositiveSelection	-3943.384303	0.00556	1.00000	0.00556	1.00000	0.00556	1.00000	999.00000	999.00000	2_H_0.999**;4_N_0.996**;5_S_0.609;7_D_0.615;8_T_0.787;9_L_0.816;10_L_0.996**;11_F_0.992**;12_G_1.000**;13_C_0.997**;14_D_0.991**;15_N_1.000**;16_E_0.556;33_A_0.619;	Putative pre-mRNA-splicing factor ATP-dependent RNA helicase DHX15	Camponotus floridanus	GO:0000166|nucleotide binding|IEA; GO:0004386|helicase activity|IEA; GO:0005524|ATP binding|IEA; GO:0008152|metabolic process|IEA; GO:0016787|hydrolase activity|IEA
FEX_0010786-mRNA1	F3x4	PositiveSelection	-2164.690987	0.08589	1.00000	0.08589	1.00000	0.08589	1.00000	111.07338	111.07338	20_V_0.501;48_A_0.709;72_I_0.539;121_H_0.802;128_H_0.633;172_C_0.975*;173_R_0.759;175_K_0.827;176_T_0.696;177_T_0.882;178_A_0.775;	EpsG multi-domain protein	Camponotus floridanus	NA
FEX_0010800-mRNA4	F3x4	PositiveSelection	-11171.944033	0.07815	1.00000	0.07815	1.00000	0.07815	1.00000	469.08185	469.08185	7_D_0.699;8_A_0.959*;466_R_0.888;865_A_0.704;1046_P_0.751;1207_G_0.533;1216_N_0.554;	RanBP-type and C3HC4-type zinc finger-containing protein 1	Camponotus floridanus	GO:0008270|zinc ion binding|IEA; GO:0046872|metal ion binding|IEA
FEX_0004761-mRNA1	F3x4	PositiveSelection	-3127.954122	0.03302	1.00000	0.03302	1.00000	0.03302	1.00000	999.00000	999.00000	19_A_0.537;66_S_0.617;102_D_0.541;340_G_0.636;341_E_0.974*;342_S_0.932;343_Q_0.980*;	Protein vein	Camponotus floridanus	NA
FEX_0003180-mRNA3	F3x4	PositiveSelection	-3188.368893	0.05321	1.00000	0.05321	1.00000	0.05321	1.00000	152.14910	152.14910	124_T_0.694;143_S_0.992**;296_Q_0.779;303_V_0.736;320_I_0.508;323_F_0.660;409_V_0.874;410_L_0.996**;411_I_0.995**;413_Y_0.994**;414_H_0.640;415_A_0.996**;416_T_0.995**;	GTP-binding protein 2	Camponotus floridanus	GO:0003924|GTPase activity|IEA; GO:0005525|GTP binding|IEA; GO:0008152|metabolic process|IEA
FEX_0003155-mRNA1	F3x4	PositiveSelection	-8847.419135	0.01222	1.00000	0.01222	1.00000	0.01222	1.00000	20.65194	20.65194	321_Q_0.532;332_V_0.630;406_Q_0.510;753_A_0.969*;763_R_0.509;813_L_0.503;	Structural maintenance of chromosomes protein	Lasius niger	GO:0003682|chromatin binding|IEA; GO:0005524|ATP binding|IEA; GO:0005634|nucleus|IEA; GO:0005694|chromosome|IEA; GO:0006281|DNA repair|IEA; GO:0007064|mitotic sister chromatid cohesion|IEA; GO:0008280|cohesin core heterodimer|IEA; GO:0051276|chromosome organization|IEA
FEX_0003153-mRNA1	F3x4	PositiveSelection	-7322.989774	0.02062	1.00000	0.02062	1.00000	0.02062	1.00000	289.53617	289.53617	121_A_0.696;212_A_0.553;221_A_0.627;746_S_0.990*;748_A_0.993**;749_S_0.996**;750_T_0.993**;751_S_0.744;752_H_0.645;753_S_0.993**;754_P_0.739;755_P_0.640;756_L_0.994**;757_T_0.785;914_D_0.582;	pfam00784, MyTH4, MyTH4 domain	Camponotus floridanus	NA
FEX_0006015-mRNA2	F3x4	PositiveSelection	-3044.179058	0.06039	1.00000	0.06039	1.00000	0.06039	1.00000	699.18686	699.18686	4_Q_0.549;35_L_0.513;40_L_0.568;62_D_0.585;237_P_0.635;243_L_0.518;277_K_0.916;278_S_0.603;279_A_0.824;284_A_0.759;291_H_0.773;292_A_0.597;293_P_0.915;297_L_0.985*;298_N_0.519;300_P_0.868;302_R_0.985*;303_S_0.682;306_L_0.630;	BTB/POZ domain-containing protein 2	Camponotus floridanus	NA
FEX_0003654-mRNA1	F3x4	PositiveSelection	-2345.729724	0.08724	1.00000	0.08724	1.00000	0.08724	1.00000	999.00000	999.00000	25_G_0.705;28_R_0.591;70_H_0.700;100_R_0.588;113_N_0.592;224_R_0.554;244_K_0.986*;	Cytochrome b5 domain-containing protein 2	Camponotus floridanus	NA
FEX_0003378-mRNA1	F3x4	PositiveSelection	-7779.719542	0.14202	1.00000	0.14202	1.00000	0.14202	1.00000	9.89759	9.89759	14_S_0.920;57_N_0.626;259_P_0.766;285_P_0.931;331_I_0.771;351_A_0.588;385_T_0.575;514_D_0.618;516_L_0.867;523_E_0.685;524_L_0.840;554_D_0.557;555_P_0.554;557_N_0.945;583_H_0.810;584_D_0.513;615_H_0.962*;	Neuronal pas domain-containing protein 2	Camponotus floridanus	GO:0003700|sequence-specific DNA binding transcription factor activity|IEA; GO:0005634|nucleus|IEA; GO:0005667|transcription factor complex|IEA; GO:0005737|cytoplasm|IEA; GO:0006355|regulation of transcription, DNA-dependent|IEA
FEX_0000212-mRNA1	F3x4	PositiveSelection	-1100.053054	0.07018	1.00000	0.07018	1.00000	0.07018	1.00000	57.43032	57.43032	1_D_0.998**;4_Q_0.958*;5_T_0.982*;7_V_0.887;8_V_0.827;10_H_0.997**;11_Y_0.868;13_D_0.998**;14_F_0.814;15_L_0.895;36_D_0.732;52_N_0.650;63_T_0.891;81_R_0.571;	tRNA-splicing endonuclease subunit Sen2	Camponotus floridanus	GO:0000213|tRNA-intron endonuclease activity|IEA; GO:0000214|tRNA-intron endonuclease complex|IEA; GO:0003676|nucleic acid binding|IEA; GO:0004518|nuclease activity|IEA; GO:0004519|endonuclease activity|IEA; GO:0006388|tRNA splicing, via endonucleolytic cleavage and ligation|IEA; GO:0008033|tRNA processing|IEA; GO:0016829|lyase activity|IEA; GO:0090305|nucleic acid phosphodiester bond hydrolysis|…
FEX_0011344-mRNA2	F3x4	PositiveSelection	-4557.981397	0.08375	1.00000	0.08375	1.00000	0.08375	1.00000	23.53968	23.53968	72_V_0.807;126_V_0.654;127_A_0.501;270_H_0.578;271_Q_0.938;381_C_0.508;449_I_0.864;451_I_0.664;453_D_0.822;454_K_0.986*;455_L_0.517;456_P_0.970*;	NADPH:adrenodoxin oxidoreductase, mitochondrial	Camponotus floridanus	GO:0008168|methyltransferase activity|IEA; GO:0016491|oxidoreductase activity|IEA; GO:0032259|methylation|IEA; GO:0055114|oxidation-reduction process|IEA
FEX_0009697-mRNA1	F3x4	PositiveSelection	-17093.429788	0.08858	1.00000	0.08858	1.00000	0.08858	1.00000	6.58754	6.58754	154_A_0.955*;155_S_0.601;193_T_0.606;276_L_0.534;359_A_0.677;438_L_0.600;447_E_0.624;464_A_0.644;475_S_0.628;597_K_0.644;790_P_0.644;818_S_0.955*;822_T_0.930;879_S_0.624;882_A_0.609;908_K_0.601;916_I_0.680;935_L_0.552;946_L_0.559;949_T_0.604;959_Y_0.599;961_Q_0.609;962_F_0.628;988_S_0.886;1033_Q_0.593;1041_R_0.658;1101_T_0.611;1106_L_0.740;1265_V_0.616;1314_C_0.608;1360_V_0.612;1390_A_0.913;1394_…	E3 SUMO-protein ligase RanBP2	Camponotus floridanus	GO:0005622|intracellular|IEA; GO:0008152|metabolic process|IEA; GO:0008270|zinc ion binding|IEA; GO:0016874|ligase activity|IEA; GO:0046907|intracellular transport|IEA
FEX_0012502-mRNA1	F3x4	PositiveSelection	-5550.807966	0.05671	1.00000	0.05671	1.00000	0.05671	1.00000	5.57948	5.57948	4_K_0.575;10_G_0.568;26_L_0.775;45_K_0.891;53_F_0.592;57_P_0.586;93_Y_0.626;96_K_0.946;103_L_0.755;115_T_0.829;248_K_0.729;293_M_0.755;301_K_0.627;304_G_0.987*;306_I_0.611;320_P_0.985*;337_T_0.614;385_A_0.986*;386_S_0.651;	Glutamate receptor, ionotropic kainate 2	Harpegnathos saltator	GO:0004872|receptor activity|IEA; GO:0004970|ionotropic glutamate receptor activity|IEA; GO:0005216|ion channel activity|IEA; GO:0005234|extracellular-glutamate-gated ion channel activity|IEA; GO:0005886|plasma membrane|IEA; GO:0006810|transport|IEA; GO:0006811|ion transport|IEA; GO:0016020|membrane|IEA; GO:0016021|integral to membrane|IEA; GO:0030054|cell junction|IEA; GO:0034220|ion transmembra…
FEX_0009108-mRNA1	F3x4	PositiveSelection	-4033.273819	0.03597	1.00000	0.03597	1.00000	0.03597	1.00000	999.00000	999.00000	10_V_0.534;165_I_0.715;223_N_0.613;244_G_0.737;291_M_0.584;292_A_0.555;391_L_0.807;503_V_0.999**;504_T_1.000**;505_K_0.957*;506_G_0.743;507_Q_0.833;508_V_0.868;509_G_0.871;510_I_0.877;511_L_0.824;	Regulator of telomere elongation helicase 1-like protein	Camponotus floridanus	GO:0000166|nucleotide binding|IEA; GO:0003676|nucleic acid binding|IEA; GO:0003677|DNA binding|IEA; GO:0004003|ATP-dependent DNA helicase activity|IEA; GO:0004386|helicase activity|IEA; GO:0005524|ATP binding|IEA; GO:0005634|nucleus|IEA; GO:0006139|nucleobase-containing compound metabolic process|IEA; GO:0008026|ATP-dependent helicase activity|IEA; GO:0016787|hydrolase activity|IEA; GO:0016818|hy…
FEX_0002268-mRNA1	F3x4	PositiveSelection	-8290.845995	0.08274	1.00000	0.08274	1.00000	0.08274	1.00000	31.20951	31.20951	97_T_0.573;151_E_0.924;296_M_0.603;511_E_0.916;662_H_0.756;949_T_0.908;952_I_0.900;953_E_0.713;954_V_0.984*;	Neither inactivation nor afterpotential protein C	Camponotus floridanus	GO:0000166|nucleotide binding|IEA; GO:0003774|motor activity|IEA; GO:0004672|protein kinase activity|IEA; GO:0005524|ATP binding|IEA; GO:0006468|protein phosphorylation|IEA; GO:0016459|myosin complex|IEA
FEX_0008625-mRNA1	F3x4	PositiveSelection	-1614.210458	0.01307	1.00000	0.01307	1.00000	0.01307	1.00000	12.31274	12.31274	8_Q_0.822;22_A_0.990**;47_S_0.872;63_T_0.771;90_G_0.882;109_S_0.794;113_V_0.663;125_P_0.750;192_S_0.651;201_T_0.657;207_N_0.793;208_K_0.847;210_L_0.835;211_Q_0.761;	pfam00225, Kinesin, Kinesin motor domain	Camponotus floridanus	NA
FEX_0011861-mRNA1	F3x4	PositiveSelection	-3353.276812	0.06634	1.00000	0.06634	1.00000	0.06634	1.00000	115.98144	115.98144	124_V_0.665;161_Q_0.501;210_V_0.501;264_M_0.626;324_T_0.981*;	39s ribosomal protein mitochondrial	Lasius niger	GO:0003735|structural constituent of ribosome|IEA; GO:0005622|intracellular|IEA; GO:0005840|ribosome|IEA; GO:0006412|translation|IEA
FEX_0004583-mRNA1	F3x4	PositiveSelection	-3400.974755	0.01952	1.00000	0.01952	1.00000	0.01952	1.00000	999.00000	999.00000	387_C_0.884;389_G_0.984*;392_R_0.926;395_A_0.800;396_H_0.938;398_R_0.805;401_V_0.703;402_G_0.910;403_S_0.775;405_G_0.794;407_N_0.863;	Acetylcholine receptor subunit alpha-like 2 protein	Camponotus floridanus	GO:0004889|acetylcholine-activated cation-selective channel activity|IEA; GO:0005216|ion channel activity|IEA; GO:0005230|extracellular ligand-gated ion channel activity|IEA; GO:0005886|plasma membrane|IEA; GO:0006810|transport|IEA; GO:0006811|ion transport|IEA; GO:0016020|membrane|IEA; GO:0016021|integral to membrane|IEA; GO:0030054|cell junction|IEA; GO:0034220|ion transmembrane transport|IEA; …
FEX_0012534-mRNA1	F3x4	PositiveSelection	-7485.771224	0.07022	1.00000	0.07022	1.00000	0.07022	1.00000	833.13352	833.13352	125_A_0.573;522_S_0.989*;750_D_0.898;751_K_0.641;752_L_0.966*;753_L_0.694;754_N_0.732;756_G_0.740;759_L_0.547;760_M_0.913;762_G_0.804;764_S_0.984*;765_K_0.993**;766_S_0.882;	DUF1777 multi-domain protein	Camponotus floridanus	NA
FEX_0004611-mRNA1	F3x4	PositiveSelection	-2702.251417	0.07321	1.00000	0.07321	1.00000	0.07321	1.00000	8.15706	8.15706	64_I_0.508;160_H_0.979*;182_E_0.512;242_G_0.971*;250_K_0.531;	Prostaglandin E synthase	Camponotus floridanus	GO:0005623|cell|IEA; GO:0009055|electron carrier activity|IEA; GO:0015035|protein disulfide oxidoreductase activity|IEA; GO:0016020|membrane|IEA; GO:0016021|integral to membrane|IEA; GO:0045454|cell redox homeostasis|IEA; GO:0055114|oxidation-reduction process|IEA
FEX_0009836-mRNA1	F3x4	PositiveSelection	-6190.401104	0.03859	1.00000	0.03859	1.00000	0.03859	1.00000	999.00000	999.00000	323_V_0.605;393_P_0.507;398_P_0.505;427_S_0.872;586_P_0.606;590_E_0.616;592_I_0.628;593_L_0.640;596_S_0.994**;597_S_0.583;598_V_0.601;599_V_0.892;	Glyco_transf_8 multi-domain protein	Camponotus floridanus	NA
FEX_0004608-mRNA1	F3x4	PositiveSelection	-4014.022845	0.09847	1.00000	0.09847	1.00000	0.09847	1.00000	998.99997	998.99997	1_E_0.986*;3_G_0.872;5_I_0.913;6_L_0.639;7_V_0.568;8_K_0.984*;9_G_0.908;10_E_0.992**;11_G_0.998**;12_S_0.915;13_R_0.997**;14_H_0.958*;15_S_0.982*;17_A_0.994**;18_A_0.990**;39_A_0.623;112_V_0.668;197_R_0.529;201_N_0.609;217_R_0.679;224_S_0.546;234_F_0.824;235_D_0.611;236_P_0.539;237_D_0.969*;261_L_0.799;317_P_0.551;325_D_0.555;	Inner nuclear membrane protein Man1	Camponotus floridanus	GO:0000166|nucleotide binding|IEA; GO:0005639|integral to nuclear inner membrane|IEA; GO:0016020|membrane|IEA; GO:0016021|integral to membrane|IEA
FEX_0012540-mRNA1	F3x4	PositiveSelection	-6238.287312	0.03246	1.00000	0.03246	1.00000	0.03246	1.00000	8.89054	8.89054	197_A_0.522;199_C_0.951*;258_R_0.533;401_Y_0.537;669_A_0.504;690_E_0.556;	WD repeat-containing protein 35	Lasius niger	NA
FEX_0005710-mRNA1	F3x4	PositiveSelection	-2064.349704	0.05488	1.00000	0.05488	1.00000	0.05488	1.00000	999.00000	999.00000	2_S_0.994**;33_M_0.594;127_E_0.544;	Methionine aminopeptidase 1D, chloroplastic/mitochondrial	Monomorium pharaonis	GO:0004177|aminopeptidase activity|IEA; GO:0006508|proteolysis|IEA; GO:0008233|peptidase activity|IEA; GO:0008235|metalloexopeptidase activity|IEA; GO:0016787|hydrolase activity|IEA; GO:0046872|metal ion binding|IEA
FEX_0010652-mRNA1	F3x4	PositiveSelection	-2993.089978	0.05419	1.00000	0.05419	1.00000	0.05419	1.00000	12.39750	12.39750	69_A_0.531;98_S_0.987*;203_D_0.518;281_S_0.571;325_T_0.981*;	Activated cdc42 kinase 1	Lasius niger	GO:0000166|nucleotide binding|IEA; GO:0004672|protein kinase activity|IEA; GO:0004713|protein tyrosine kinase activity|IEA; GO:0005524|ATP binding|IEA; GO:0006468|protein phosphorylation|IEA; GO:0016301|kinase activity|IEA; GO:0016310|phosphorylation|IEA; GO:0016740|transferase activity|IEA; GO:0018108|peptidyl-tyrosine phosphorylation|IEA
FEX_0007714-mRNA1	F3x4	PositiveSelection	-2706.907416	0.09395	1.00000	0.09395	1.00000	0.09395	1.00000	229.24090	229.24090	6_N_0.727;24_A_0.861;44_E_0.983*;95_V_0.682;96_D_0.642;186_A_0.699;206_E_0.716;240_I_0.820;241_I_0.963*;242_A_0.997**;243_K_0.865;244_K_0.997**;245_K_0.875;246_N_0.999**;247_I_0.867;248_D_0.999**;249_W_0.991**;252_R_0.993**;253_L_0.700;255_D_0.998**;256_E_0.999**;258_T_0.999**;259_D_0.625;261_E_0.997**;263_L_0.891;264_K_0.995**;265_K_0.904;	N-acetylgalactosamine kinase	Camponotus floridanus	GO:0000166|nucleotide binding|IEA; GO:0004335|galactokinase activity|IEA; GO:0005524|ATP binding|IEA; GO:0005737|cytoplasm|IEA; GO:0006012|galactose metabolic process|IEA; GO:0008152|metabolic process|IEA; GO:0016301|kinase activity|IEA; GO:0016310|phosphorylation|IEA; GO:0016740|transferase activity|IEA; GO:0016773|phosphotransferase activity, alcohol group as acceptor|IEA; GO:0046835|carbohydra…
FEX_0003023-mRNA1	F3x4	PositiveSelection	-8676.803728	0.12112	1.00000	0.12112	1.00000	0.12112	1.00000	284.57667	284.57667	38_A_0.793;39_T_0.932;41_K_0.661;42_D_0.551;43_L_0.957*;46_S_0.952*;47_L_0.909;48_D_0.852;243_K_0.843;369_R_0.833;550_G_0.767;622_T_0.616;	40s ribosomal protein s15	Lasius niger	GO:0003723|RNA binding|IEA; GO:0003735|structural constituent of ribosome|IEA; GO:0005840|ribosome|IEA; GO:0006412|translation|IEA; GO:0015935|small ribosomal subunit|IEA; GO:0030529|ribonucleoprotein complex|IEA
FEX_0002907-mRNA1	F3x4	PositiveSelection	-3393.516890	0.02620	1.00000	0.02620	1.00000	0.02620	1.00000	999.00000	999.00000	23_S_0.591;439_V_0.927;440_K_0.993**;441_L_0.593;442_C_0.843;443_P_1.000**;444_I_1.000**;445_E_0.955*;446_N_0.999**;	A-kinase anchor protein 9	Lasius niger	GO:0016301|kinase activity|IEA; GO:0016310|phosphorylation|IEA
FEX_0008905-mRNA1	F3x4	PositiveSelection	-2701.139667	0.02406	1.00000	0.02406	1.00000	0.02406	1.00000	478.04288	478.04288	33_V_0.573;193_T_0.721;372_R_0.998**;373_E_0.999**;374_P_0.996**;	Protein tweety homolog	Camponotus floridanus	GO:0005254|chloride channel activity|IEA; GO:0005886|plasma membrane|IEA; GO:0006810|transport|IEA; GO:0006811|ion transport|IEA; GO:0006821|chloride transport|IEA; GO:0016020|membrane|IEA; GO:0016021|integral to membrane|IEA; GO:0034707|chloride channel complex|IEA; GO:1902476||IEA
FEX_0008229-mRNA5	F3x4	PositiveSelection	-4458.195545	0.04466	1.00000	0.04466	1.00000	0.04466	1.00000	4.56328	4.56328	11_L_0.536;52_Y_0.524;91_A_0.567;110_Y_0.528;144_K_0.989*;	Glucose-6-phosphate 1-dehydrogenase	Camponotus floridanus	GO:0004345|glucose-6-phosphate dehydrogenase activity|IEA; GO:0005975|carbohydrate metabolic process|IEA; GO:0006006|glucose metabolic process|IEA; GO:0006098|pentose-phosphate shunt|IEA; GO:0016020|membrane|IEA; GO:0016021|integral to membrane|IEA; GO:0016491|oxidoreductase activity|IEA; GO:0050661|NADP binding|IEA; GO:0055114|oxidation-reduction process|IEA
FEX_0008965-mRNA1	F3x4	PositiveSelection	-1433.332786	0.10765	1.00000	0.10765	1.00000	0.10765	1.00000	3.57243	3.57243	7_I_0.682;11_A_0.744;29_V_0.659;38_H_0.814;44_Y_0.841;56_N_0.984*;71_K_0.832;82_T_0.835;84_V_0.842;100_I_0.764;108_N_0.711;125_V_0.676;131_R_0.982*;	Putative salivary secreted peptide-like protein	Lasius niger	NA
FEX_0008968-mRNA1	F3x4	PositiveSelection	-2651.822851	0.06262	1.00000	0.06262	1.00000	0.06262	1.00000	9.83385	9.83385	6_D_0.667;28_N_0.618;134_G_0.697;137_P_0.982*;148_P_0.726;179_N_0.735;182_T_0.594;227_S_0.741;262_A_0.643;263_A_0.986*;	SAGA-associated factor 29-like protein	Camponotus floridanus	NA
FEX_0007847-mRNA2	F3x4	PositiveSelection	-4877.950681	0.05725	1.00000	0.05725	1.00000	0.05725	1.00000	5.01670	5.01670	19_D_0.505;238_E_0.558;464_K_0.952*;483_L_0.551;490_Y_0.541;505_R_0.608;545_F_0.582;	DNA primase large subunit	Lasius niger	GO:0003677|DNA binding|IEA; GO:0003896|DNA primase activity|IEA; GO:0003899|DNA-directed RNA polymerase activity|IEA; GO:0006260|DNA replication|IEA; GO:0006269|DNA replication, synthesis of RNA primer|IEA; GO:0016740|transferase activity|IEA; GO:0016779|nucleotidyltransferase activity|IEA; GO:0046872|metal ion binding|IEA; GO:0051536|iron-sulfur cluster binding|IEA; GO:0051539|4 iron, 4 sulfur c…
FEX_0007870-mRNA1	F3x4	PositiveSelection	-3078.792517	0.05552	1.00000	0.05552	1.00000	0.05552	1.00000	15.15891	15.15891	12_S_0.690;22_V_0.671;28_I_0.574;38_P_0.806;45_T_0.675;61_L_0.978*;74_P_0.742;77_V_0.634;93_W_0.795;103_N_0.969*;112_P_0.514;117_D_0.598;135_T_0.758;149_N_0.661;158_P_0.809;163_S_0.541;167_G_0.993**;169_K_0.838;173_D_0.511;183_D_0.556;186_N_0.660;188_L_0.895;189_Q_0.844;190_F_0.780;200_P_0.838;204_M_0.785;206_L_0.707;	pfam01607, CBM_14, Chitin binding Peritrophin-A domain	Monomorium pharaonis	NA
FEX_0007860-mRNA6	F3x4	PositiveSelection	-3974.291115	0.04731	1.00000	0.04731	1.00000	0.04731	1.00000	5.66377	5.66377	213_D_0.571;235_G_0.632;281_G_0.974*;369_G_0.530;375_G_0.974*;401_H_0.612;415_A_0.816;	Transcription factor sox-2	Lasius niger	GO:0006355|regulation of transcription, DNA-dependent|IEA; GO:0007399|nervous system development|IEA
FEX_0011162-mRNA1	F3x4	PositiveSelection	-2739.035864	0.05387	1.00000	0.05387	1.00000	0.05387	1.00000	998.98320	998.98320	17_K_0.609;25_I_0.669;57_L_0.981*;59_Y_0.980*;65_G_0.786;66_L_0.941;113_P_0.651;175_T_0.597;185_V_0.988*;223_G_0.988*;	Chorion protein s38	Lasius niger	NA
FEX_0011163-mRNA1	F3x4	PositiveSelection	-7504.655925	0.14627	1.00000	0.14627	1.00000	0.14627	1.00000	48.61923	48.61923	2_D_0.956*;4_I_0.738;5_D_0.989*;6_T_0.882;7_I_0.986*;10_T_0.791;11_A_0.725;12_A_0.953*;56_E_0.969*;145_I_0.893;169_V_0.718;366_P_0.642;398_R_0.552;429_W_0.784;534_K_0.936;626_Q_0.612;	Paramyosin-like protein	Lasius niger	NA
FEX_0011103-mRNA5	F3x4	PositiveSelection	-8298.167231	0.03826	1.00000	0.03826	1.00000	0.03826	1.00000	999.00000	999.00000	144_L_0.620;237_A_0.506;291_S_0.991**;299_A_0.514;327_S_0.626;437_A_0.610;483_F_0.699;551_S_0.722;680_L_0.569;772_A_0.514;807_S_0.704;898_P_0.773;965_A_0.990**;966_E_1.000**;967_D_0.964*;968_S_0.996**;969_A_0.702;970_S_0.988*;971_L_0.620;972_E_0.682;973_Y_0.520;974_L_0.997**;975_L_0.994**;976_A_0.999**;	Nucleoporin nup188-like protein	Lasius niger	NA
FEX_0012723-mRNA1	F3x4	PositiveSelection	-5206.535425	0.01949	1.00000	0.01949	1.00000	0.01949	1.00000	2.72523	2.72523	22_V_0.537;87_L_0.562;103_D_0.511;137_T_0.519;283_P_0.570;376_K_0.516;527_S_0.588;560_K_0.516;670_G_0.962*;	Dynamin-1-like protein	Acromyrmex echinatior	GO:0000166|nucleotide binding|IEA; GO:0003924|GTPase activity|IEA; GO:0005525|GTP binding|IEA; GO:0008152|metabolic process|IEA
FEX_0006931-mRNA1	F3x4	PositiveSelection	-3862.540783	0.03995	1.00000	0.03995	1.00000	0.03995	1.00000	8.61672	8.61672	24_R_0.592;28_V_0.664;128_V_0.841;253_A_0.504;261_S_0.976*;265_K_0.667;423_L_0.653;	D-2-hydroxyglutarate dehydrogenase, mitochondrial	Camponotus floridanus	GO:0003824|catalytic activity|IEA; GO:0016491|oxidoreductase activity|IEA; GO:0016614|oxidoreductase activity, acting on CH-OH group of donors|IEA; GO:0050660|flavin adenine dinucleotide binding|IEA; GO:0055114|oxidation-reduction process|IEA
FEX_0012594-mRNA2	F3x4	PositiveSelection	-3060.351459	0.04716	1.00000	0.04716	1.00000	0.04716	1.00000	104.83328	104.83328	10_P_0.943;169_S_0.912;183_A_0.947;202_S_0.939;269_A_0.952*;271_Q_0.985*;272_G_1.000**;273_Y_0.930;274_Q_0.999**;275_R_1.000**;276_R_1.000**;277_Q_1.000**;278_R_0.909;279_R_0.896;280_S_0.936;281_E_1.000**;282_E_0.898;283_E_0.946;284_L_0.898;285_K_0.890;286_Q_0.980*;287_A_0.864;288_S_0.999**;289_D_0.999**;290_M_0.999**;291_V_0.992**;292_A_0.986*;293_R_0.998**;295_M_0.984*;297_F_0.999**;298_Q_0.894…	Protein bric-a-brac 1	Lasius niger	NA
FEX_0012586-mRNA1	F3x4	PositiveSelection	-5877.589053	0.10388	1.00000	0.10388	1.00000	0.10388	1.00000	14.90150	14.90150	32_L_0.612;34_N_0.577;48_K_0.638;126_H_0.705;142_C_0.676;143_I_0.727;163_I_0.967*;202_L_0.651;221_T_0.524;244_D_0.563;300_R_0.561;343_L_0.656;396_R_0.944;473_V_0.526;493_I_0.582;495_S_0.539;505_N_0.901;536_E_0.704;537_I_0.966*;548_E_0.527;553_F_0.701;556_A_0.989*;560_L_0.614;571_V_0.897;	Proteasome-associated protein ecm29-like protein	Lasius niger	GO:0000502|proteasome complex|IEA
