# Supplementary material for: The first draft genomes of the ant Formica exsecta, and its Wolbachia endosymbiont reveal extensive gene transfer from endosymbiont to host
Source: BMC Genomics. 2019 Apr 16;20:301. doi: 10.1186/s12864-019-5665-6 (PMC6469114; doi:10.1186/s12864-019-5665-6)
Supplement: Supplementary file 5 — Table S5. List of F. exsecta genes showing dN/dS ratios > 1 in pairwise comparison to Camponotus floridanus. (XLSX 11 kb) [file 12864_2019_5665_MOESM5_ESM.xlsx]

## Sheet: Table S5
Table S5: List of F. exsecta genes showing dN/dS ratios > 1 in pairwise comparison to Camponotus floridanus.
Gene Name	t	S	N	dN/dS	dN	dS	Nei & Gojobori 1986. dN/dS	dS	dS	Probable Annotation
FEX_0000996-mRNA1	0.1055	90.3	209.7	4.1086	0.0455	0.0111	3.0121	0.0410	0.0136	Putative uncharacterized protein
FEX_0003852-mRNA1	0.0835	130.7	241.3	2.2156	0.0345	0.0156	1.4104	0.0296	0.0210	Putative uncharacterized protein
FEX_0005831-mRNA1	0.1680	119.3	225.7	1.9684	0.0675	0.0343	1.0185	0.0543	0.0533	Transposase
FEX_0006158-mRNA1	14.6123	174.5	293.5	1.9463	5.9490	3.0565	0.6554	0.2763	0.4215	Plasmodium_HRP multi-domain protein
FEX_0004584-mRNA1	0.1358	88.8	148.2	1.8363	0.0546	0.0297	1.3204	0.0469	0.0355	Putative uncharacterized protein
FEX_0000227-mRNA3	0.5586	212.3	450.7	1.7102	0.2148	0.1256	1.2472	0.1903	0.1526	Putative uncharacterized protein
FEX_0011669-mRNA1	1.2133	95.3	252.7	1.5825	0.4498	0.2842	1.0644	0.3722	0.3496	Putative transposase-like protein
FEX_0001570-mRNA1	0.9213	85.4	196.6	1.5031	0.3417	0.2273	1.2180	0.3060	0.2513	Putative uncharacterized protein
FEX_0003497-mRNA1	1.2557	80.2	225.8	1.4824	0.4576	0.3087	1.1457	0.4081	0.3562	Putative uncharacterized protein
FEX_0004048-mRNA1	0.2645	80.2	225.8	1.3943	0.0952	0.0683	1.2514	0.0909	0.0726	EpsG domain containing protein
FEX_0002422-mRNA1	0.9644	60.1	167.9	1.3560	0.3454	0.2547	1.0204	0.3121	0.3059	Putative uncharacterized protein
FEX_0000962-mRNA2	0.4603	62.3	156.7	1.3068	0.1644	0.1258	0.9251	0.1431	0.1546	Icarapin-like protein
FEX_0001000-mRNA1	0.4364	94.6	211.4	1.3038	0.1568	0.1202	0.9475	0.1378	0.1454	Putative uncharacterized protein
FEX_0012082-mRNA1	0.1759	160.3	523.7	1.2887	0.0619	0.0480	0.9896	0.0623	0.0630	7tm_7 domain containing protein
FEX_0010919-mRNA1	1.0330	112.8	283.2	1.2665	0.3663	0.2892	1.0920	0.3427	0.3138	EpsG domain containing protein
FEX_0000597-mRNA1	1.1595	83.7	207.3	1.2343	0.4088	0.3312	1.1490	0.3889	0.3384	EpsG multi-domain protein
FEX_0003990-mRNA1	2.7629	126.5	284.5	1.1430	0.9579	0.8380	1.0808	0.8025	0.7425	Putative uncharacterized protein
FEX_0003469-mRNA1	0.7457	73.5	142.5	1.1179	0.2578	0.2306	0.6165	0.1954	0.3169	Putative uncharacterized protein
FEX_0002016-mRNA1	1.1403	63.4	131.6	1.1093	0.3927	0.3540	0.9107	0.3446	0.3784	Putative uncharacterized protein
FEX_0003705-mRNA1	0.2645	98.1	291.9	1.0983	0.0902	0.0821	1.0842	0.0887	0.0818	Putative uncharacterized protein
FEX_0009604-mRNA2	0.0290	108.0	222.0	1.0919	0.0099	0.0091	0.7384	0.0083	0.0113	PREDICTED: RNA-binding protein Musashi homolog Rbp6 isoform X3
FEX_0008321-mRNA1	0.1136	115.9	244.1	1.0644	0.0386	0.0363	0.8430	0.0352	0.0418	Putative uncharacterized protein
FEX_0007862-mRNA1	0.5836	102.8	299.2	1.0554	0.1972	0.1868	0.9854	0.1910	0.1938	CAF-1_p150 multi-domain protein
FEX_0002552-mRNA1	0.6259	87.0	204.0	1.0442	0.2113	0.2024	0.8737	0.1922	0.2200	Putative uncharacterized protein
FEX_0000586-mRNA1	1.1301	105.6	290.4	1.0249	0.3791	0.3699	0.9460	0.3622	0.3829	Putative uncharacterized protein
FEX_0009529-mRNA1	1.5378	60.0	192.0	1.0049	0.5132	0.5107	1.1390	0.4936	0.4333	Homeobox protein orthopedia
FEX_0004867-mRNA1	0.8423	85.5	271.5	1.0025	0.2809	0.2802	1.0365	0.2766	0.2669	Putative uncharacterized protein
FEX_0008493-mRNA1	1.3702	207.4	404.6	1.0002	0.4568	0.4567	0.6987	0.3355	0.4802	Mucin multi-domain protein
