# Supplementary material for: The first draft genomes of the ant Formica exsecta, and its Wolbachia endosymbiont reveal extensive gene transfer from endosymbiont to host
Source: BMC Genomics. 2019 Apr 16;20:301. doi: 10.1186/s12864-019-5665-6 (PMC6469114; doi:10.1186/s12864-019-5665-6)
Supplement: Supplementary file 7 — Table S6. List of genes with paralogs in the wFex genome, which are present as single copies in the wMel, wRi, wDac genomes. (XLSX 27 kb) [file 12864_2019_5665_MOESM7_ESM.xlsx]

## Sheet: wFEX_paralogs.txt
Table S6: List of genes with paralogs in the wFex genome, which are present as single copies in the wMel, wRi, wDac genomes.
wDAc	wMel	wRi	wFex Gene with Paralogs	Annotation
WP_064085353.1	WP_006279458.1	WP_012673099.1	scaffold789:28894-29302;scaffold1582:5760-6168;	WP_064085353.1 deoxyuridine 5'-triphosphate nucleotidohydrolase [Wolbachia endosymbiont of Dactylopius coccus]
WP_007302624.1	WP_006279664.1	WP_007550935.1	scaffold1601:36482-36836;scaffold960:40075-40417;	WP_007302624.1 MULTISPECIES: membrane protein [Wolbachia]
WP_010403511.1	WP_006279756.1	WP_007548372.1	scaffold2789:2862-3180;scaffold2215:24294-24639;	WP_010403511.1 MULTISPECIES: QacE family quaternary ammonium compound efflux SMR transporter [Wolbachia]
WP_064085749.1	WP_006279879.1	WP_007549339.1	scaffold650:39264-39816;scaffold927:29071-29614;	WP_064085749.1 peptidase M24 [Wolbachia endosymbiont of Dactylopius coccus]
WP_064085942.1	WP_006279887.1	WP_012673137.1	scaffold513:41514-42495;scaffold1637:88925-89906;	WP_064085942.1 pyruvate dehydrogenase (acetyl-transferring) E1 component subunit alpha [Wolbachia endosymbiont of Dactylopius coccus]
WP_029237605.1	WP_006279908.1	WP_006279908.1	scaffold3023:2806-3145;scaffold716:51552-51891;	WP_029237605.1 MULTISPECIES: lipoprotein [Wolbachia]
WP_064085547.1	WP_006279913.1	WP_006279913.1	scaffold65:51166-51715;scaffold1123:618-1191;	WP_064085547.1 hypothetical protein [Wolbachia endosymbiont of Dactylopius coccus]
WP_029237654.1	WP_006279914.1	WP_006279914.1	scaffold5063:6238-6943;scaffold5063:5046-5751;	WP_029237654.1 MULTISPECIES: ribonuclease III [Wolbachia]
WP_064085903.1	WP_006279962.1	WP_006279962.1	scaffold4553:7617-8010;scaffold3342:21-414;	WP_064085903.1 hypothetical protein [Wolbachia endosymbiont of Dactylopius coccus]
WP_064085278.1	WP_006280118.1	WP_006280118.1	scaffold716:53258-55006;scaffold1392:926-2656;	WP_064085278.1 hypothetical protein [Wolbachia endosymbiont of Dactylopius coccus]
WP_064085230.1	WP_006280119.1	WP_006280119.1	scaffold1392:2779-3769;scaffold716:52020-53010;	WP_064085230.1 ribonucleotide-diphosphate reductase subunit beta [Wolbachia endosymbiont of Dactylopius coccus]
WP_064085500.1	WP_006280528.1	WP_006280528.1	scaffold1637:82684-83947;scaffold513:36829-38092;	WP_064085500.1 MFS transporter [Wolbachia endosymbiont of Dactylopius coccus]
WP_064085462.1	WP_007548582.1	WP_007548582.1	scaffold1392:36277-37528;scaffold716:30311-31562;	WP_064085462.1 tyrosine--tRNA ligase [Wolbachia endosymbiont of Dactylopius coccus]
WP_006013575.1	WP_007548602.1	WP_007548602.1	scaffold513:75249-75462;scaffold347:20992-21205;scaffold347:23206-23419;	WP_006013575.1 MULTISPECIES: 50S ribosomal protein L31 [Wolbachia]
WP_010403780.1	WP_007549072.1	WP_007549072.1	scaffold4553:6524-7556;scaffold1908:13516-14548;scaffold3342:19737-20769;	WP_010403780.1 MULTISPECIES: undecaprenyldiphospho-muramoylpentapeptide beta-N- acetylglucosaminyltransferase [Wolbachia]
WP_006014699.1	WP_007549313.1	WP_007549313.1	scaffold1498:34682-35542;scaffold5902:9076-9936;	WP_006014699.1 MULTISPECIES: 30S ribosomal protein S7 [Wolbachia]
WP_064085288.1	WP_010081942.1	WP_039963709.1	scaffold717:7879-8188;scaffold650:178667-178976;	WP_064085288.1 hypothetical protein [Wolbachia endosymbiont of Dactylopius coccus]
WP_064085726.1	WP_010081987.1	WP_012673220.1	scaffold2789:99679-100417;scaffold431:121108-121846;	WP_064085726.1 hypothetical protein [Wolbachia endosymbiont of Dactylopius coccus]
WP_064085389.1	WP_010081988.1	WP_007549200.1	scaffold2385:32443-33580;scaffold1392:97234-98371;	WP_064085389.1 aminotransferase class V [Wolbachia endosymbiont of Dactylopius coccus]
WP_064085486.1	WP_010082013.1	WP_012673335.1	scaffold1341:80388-81405;scaffold1341:82614-83631;scaffold2789:564-1581;	WP_064085486.1 uroporphyrinogen decarboxylase [Wolbachia endosymbiont of Dactylopius coccus]
WP_064085708.1	WP_010082053.1	WP_007548704.1	scaffold5063:3894-4962;scaffold5063:7027-8095;	WP_064085708.1 dihydroorotate dehydrogenase (quinone) [Wolbachia endosymbiont of Dactylopius coccus]
WP_064085837.1	WP_010082061.1	WP_012673395.1	scaffold650:183768-184275;scaffold717:24000-24507;	WP_064085837.1 inorganic pyrophosphatase [Wolbachia endosymbiont of Dactylopius coccus]
WP_007302062.1	WP_010082068.1	WP_006280462.1	scaffold2729:104660-106120;scaffold3968:25108-26568;	WP_007302062.1 MULTISPECIES: NAD(P)-dependent oxidoreductase [Wolbachia]
WP_064085685.1	WP_010082095.1	WP_006280216.1	scaffold789:64478-65837;scaffold789:60969-62328;scaffold1341:48189-49551;	WP_064085685.1 NTPase [Wolbachia endosymbiont of Dactylopius coccus]
WP_064085428.1	WP_010082097.1	WP_007548917.1	scaffold650:65299-65719;scaffold2789:49749-50169;	WP_064085428.1 nucleoside-diphosphate kinase [Wolbachia endosymbiont of Dactylopius coccus]
WP_064085976.1	WP_010082183.1	WP_007548834.1	scaffold1491:21637-22105;scaffold1498:23359-23827;	WP_064085976.1 Holliday junction resolvase RuvX [Wolbachia endosymbiont of Dactylopius coccus]
WP_012481726.1	WP_010082236.1	WP_006280330.1	scaffold2789:12034-12709;scaffold1341:67407-68082;	WP_012481726.1 MULTISPECIES: septal ring lytic transglycosylase RlpA family lipoprotein [Wolbachia]
WP_064085982.1	WP_010082251.1	WP_006279565.1	scaffold1498:18549-18852;scaffold1491:26615-26918;	WP_064085982.1 50S ribosomal protein L21 [Wolbachia endosymbiont of Dactylopius coccus]
WP_007302273.1	WP_010082330.1	WP_006280123.1	scaffold717:74816-75599;scaffold716:5778-6564;	WP_007302273.1 MULTISPECIES: P-type conjugative transfer protein VirB9 [Wolbachia]
WP_064085344.1	WP_010082331.1	WP_007548591.1	scaffold716:12005-12778;scaffold717:75784-76557;	WP_064085344.1 outer membrane lipid asymmetry maintenance protein MlaD [Wolbachia endosymbiont of Dactylopius coccus]
WP_064085741.1	WP_010082408.1	WP_007548604.1	scaffold513:72564-74085;scaffold347:18339-19860;	WP_064085741.1 phosphoglycerate mutase (2,3-diphosphoglycerate-independent) [Wolbachia endosymbiont of Dactylopius coccus]
WP_015587883.1	WP_010082473.1	WP_010082473.1	scaffold2729:10845-11328;scaffold250:68000-68483;	WP_015587883.1 MULTISPECIES: 16S rRNA maturation RNase YbeY [Wolbachia]
WP_064085271.1	WP_010082478.1	WP_006280293.1	scaffold2789:20237-21131;scaffold1341:58944-59832;	WP_064085271.1 tRNA (adenosine(37)-N6)-dimethylallyltransferase MiaA [Wolbachia endosymbiont of Dactylopius coccus]
WP_064085256.1	WP_010082490.1	WP_012673208.1	scaffold716:23745-24312;scaffold717:88457-89033;	WP_064085256.1 phosphoribosylglycinamide formyltransferase [Wolbachia endosymbiont of Dactylopius coccus]
WP_064085260.1	WP_010082492.1	WP_007548859.1	scaffold1601:29907-30939;scaffold2789:57859-58891;	WP_064085260.1 peptidase M16 [Wolbachia endosymbiont of Dactylopius coccus]
WP_010402332.1	WP_010082499.1	WP_006280275.1	scaffold789:133791-134430;scaffold716:62229-62868;	WP_010402332.1 MULTISPECIES: endonuclease III [Wolbachia]
WP_064085671.1	WP_010082500.1	WP_007548894.1	scaffold3826:10045-11215;scaffold4958:3006-4203;	WP_064085671.1 succinyl-diaminopimelate desuccinylase [Wolbachia endosymbiont of Dactylopius coccus]
WP_064085789.1	WP_010082530.1	WP_007549156.1	scaffold1392:144416-144707;scaffold2385:13671-13962;scaffold431:122037-122328;	WP_064085789.1 MULTISPECIES: GIY-YIG nuclease [Wolbachia]
WP_010401576.1	WP_010082533.1	WP_012673159.1	scaffold960:66898-68650;scaffold960:75170-76919;	WP_010401576.1 MULTISPECIES: DNA primase [Wolbachia]
WP_064085304.1	WP_010082535.1	WP_006280386.1	scaffold2215:2628-3495;scaffold2215:12573-14621;	WP_064085304.1 4-(cytidine 5'-diphospho)-2-C-methyl-D-erythritol kinase [Wolbachia endosymbiont of Dactylopius coccus]
WP_010404360.1	WP_010082574.1	WP_006280142.1	scaffold4313:17288-17984;scaffold4553:13410-14285;	WP_010404360.1 MULTISPECIES: DNA polymerase III subunit epsilon [Wolbachia]
WP_064085441.1	WP_010082597.1	WP_006279873.1	scaffold2508:28171-29413;scaffold432:37146-38382;	WP_064085441.1 hypothetical protein [Wolbachia endosymbiont of Dactylopius coccus]
WP_064085791.1	WP_010082605.1	WP_012673073.1	scaffold2215:22748-23855;scaffold2665:33441-34548;	WP_064085791.1 D-alanyl-D-alanine carboxypeptidase [Wolbachia endosymbiont of Dactylopius coccus]
WP_012481713.1	WP_010962298.1	WP_010962298.1	scaffold872:13987-15382;scaffold1637:53696-55091;	WP_012481713.1 MULTISPECIES: chromosomal replication initiation protein DnaA [Wolbachia]
WP_064086003.1	WP_010962301.1	WP_007549028.1	scaffold1637:45714-48205;scaffold872:7627-10118;	WP_064086003.1 type VI secretion protein [Wolbachia endosymbiont of Dactylopius coccus]
WP_064086005.1	WP_010962304.1	WP_007549025.1	scaffold872:4936-5785;scaffold1637:44204-45032;	WP_064086005.1 P44/Msp2 family outer membrane protein [Wolbachia endosymbiont of Dactylopius coccus]
WP_007301995.1	WP_010962305.1	WP_012673036.1	scaffold1637:43202-44042;scaffold872:3917-4757;	WP_007301995.1 MULTISPECIES: protein-(glutamine-N5) methyltransferase, release factor-specific [Wolbachia]
WP_064085925.1	WP_010962313.1	WP_012673040.1	scaffold1637:14065-15028;scaffold1637:1974-2937;	WP_064085925.1 tRNA dihydrouridine synthase DusB [Wolbachia endosymbiont of Dactylopius coccus]
WP_064085932.1	WP_010962316.1	WP_041582627.1	scaffold1637:16453-17752;scaffold789:159108-160407;	WP_064085932.1 serine--tRNA ligase [Wolbachia endosymbiont of Dactylopius coccus]
WP_064085927.1	WP_010962317.1	WP_012673043.1	scaffold1637:17786-19058;scaffold1637:6410-7682;	WP_064085927.1 phosphoribosylamine--glycine ligase [Wolbachia endosymbiont of Dactylopius coccus]
WP_064085820.1	WP_010962325.1	WP_012673044.1	scaffold432:59911-61546;scaffold431:33918-36825;	WP_064085820.1 RNase J family beta-CASP ribonuclease [Wolbachia endosymbiont of Dactylopius coccus]
WP_064085821.1	WP_010962326.1	WP_012673045.1	scaffold432:58576-59695;scaffold431:32583-33702;	WP_064085821.1 molecular chaperone DnaJ [Wolbachia endosymbiont of Dactylopius coccus]
WP_064085750.1	WP_010962340.1	WP_012673049.1	scaffold927:29626-32077;scaffold650:39828-42360;	WP_064085750.1 leucine--tRNA ligase [Wolbachia endosymbiont of Dactylopius coccus]
WP_064085894.1	WP_010962341.1	WP_012673050.1	scaffold1392:118556-119162;scaffold2385:46018-46657;	WP_064085894.1 hypothetical protein [Wolbachia endosymbiont of Dactylopius coccus]
WP_006014941.1	WP_010962343.1	WP_010082596.1	scaffold432:36555-37014;scaffold2508:27580-28039;	WP_006014941.1 MULTISPECIES: 50S ribosomal protein L13 [Wolbachia]
WP_064085440.1	WP_010962344.1	WP_012673052.1	scaffold432:39044-39623;scaffold2508:30084-30663;	WP_064085440.1 50S rRNA methyltransferase [Wolbachia endosymbiont of Dactylopius coccus]
WP_064085268.1	WP_010962374.1	WP_006280490.1	scaffold1392:111092-112373;scaffold2385:37142-38423;	WP_064085268.1 4-hydroxy-3-methylbut-2-en-1-yl diphosphate synthase [Wolbachia endosymbiont of Dactylopius coccus]
WP_064085507.1	WP_010962378.1	WP_006280290.1	scaffold2385:41327-43712;scaffold1392:113889-116283;	WP_064085507.1 DNA translocase FtsK [Wolbachia endosymbiont of Dactylopius coccus]
WP_064085309.1	WP_010962383.1	WP_006280249.1	scaffold1498:12111-12717;scaffold1491:35550-36156;	WP_064085309.1 CvpA family protein [Wolbachia endosymbiont of Dactylopius coccus]
WP_064085308.1	WP_010962384.1	WP_012673066.1	scaffold1491:32294-32891;scaffold1491:34896-35493;scaffold1498:12774-13371;	WP_064085308.1 riboflavin synthase [Wolbachia endosymbiont of Dactylopius coccus]
WP_064085986.1	WP_010962387.1	WP_012673064.1	scaffold1498:16445-17681;scaffold1491:27784-29023;	WP_064085986.1 bifunctional N-acetylglucosamine-1-phosphate uridyltransferase/glucosamine-1-phosphate acetyltransferase [Wolbachia endosymbiont of Dactylopius coccus]
WP_064085981.1	WP_010962389.1	WP_007548829.1	scaffold1491:25013-26186;scaffold1498:19275-20448;	WP_064085981.1 methionine adenosyltransferase [Wolbachia endosymbiont of Dactylopius coccus]
WP_064085979.1	WP_010962391.1	WP_006280356.1	scaffold1491:23513-24095;scaffold1498:21369-21951;	WP_064085979.1 TenA family transcriptional regulator [Wolbachia endosymbiont of Dactylopius coccus]
WP_064085943.1	WP_010962393.1	WP_007548988.1	scaffold1498:24817-26239;scaffold1491:19838-21263;	WP_064085943.1 aspartyl/glutamyl-tRNA amidotransferase subunit B [Wolbachia endosymbiont of Dactylopius coccus]
WP_082861195.1	WP_010962407.1	WP_012673057.1	scaffold431:4138-4930;scaffold431:18745-19537;scaffold431:933-1725;	WP_082861195.1 type I methionyl aminopeptidase [Wolbachia endosymbiont of Dactylopius coccus]
WP_064085626.1	WP_010962408.1	WP_007548284.1	scaffold2508:40364-41567;scaffold431:17479-18682;	WP_064085626.1 MFS transporter [Wolbachia endosymbiont of Dactylopius coccus]
WP_064085625.1	WP_010962409.1	WP_007548285.1	scaffold432:49975-50785;scaffold432:47767-48556;	WP_064085625.1 16S rRNA (cytosine(1402)-N(4))-methyltransferase [Wolbachia endosymbiont of Dactylopius coccus]
WP_064085653.1	WP_010962415.1	WP_012673055.1	scaffold789:14093-15251;scaffold789:3556-4714;scaffold250:38876-40025;	WP_064085653.1 2-octaprenyl-3-methyl-6-methoxy-1,4-benzoquinol hydroxylase [Wolbachia endosymbiont of Dactylopius coccus]
WP_064085459.1	WP_010962417.1	WP_007548295.1	scaffold789:15762-16773;scaffold250:37684-38695;	WP_064085459.1 ATPase [Wolbachia endosymbiont of Dactylopius coccus]
WP_064085733.1	WP_010962427.1	WP_010962427.1	scaffold2508:15671-17234;scaffold2508:9861-11424;	WP_064085733.1 GMP synthase (glutamine-hydrolyzing) [Wolbachia endosymbiont of Dactylopius coccus]
WP_064085280.1	WP_010962436.1	WP_010082279.1	scaffold1392:307-925;scaffold716:55000-55624;	WP_064085280.1 hypothetical protein [Wolbachia endosymbiont of Dactylopius coccus]
WP_010401888.1	WP_010962441.1	WP_007548497.1	scaffold1392:6530-7907;scaffold1392:14939-16316;scaffold716:47749-49126;	WP_010401888.1 MULTISPECIES: PleD family two-component system response regulator [Wolbachia]
WP_064086009.1	WP_010962443.1	WP_012673089.1	scaffold1392:16589-21296;scaffold716:42730-47476;	WP_064086009.1 glutamate dehydrogenase [Wolbachia endosymbiont of Dactylopius coccus]
WP_064086010.1	WP_010962444.1	WP_039963776.1	scaffold1392:21321-23922;scaffold716:40655-42704;	WP_064086010.1 ATP-dependent chaperone ClpB [Wolbachia endosymbiont of Dactylopius coccus]
WP_007302691.1	WP_010962447.1	WP_012673092.1	scaffold250:36175-37183;scaffold789:17370-19200;	WP_007302691.1 MULTISPECIES: translational GTPase TypA [Wolbachia]
WP_064085936.1	WP_010962501.1	WP_012673172.1	scaffold3087:6954-10005;scaffold899:16219-19171;	WP_064085936.1 hypothetical protein [Wolbachia endosymbiont of Dactylopius coccus]
WP_006012580.1	WP_010962504.1	WP_006280302.1	scaffold1582:6371-7178;scaffold789:29497-30304;	WP_006012580.1 MULTISPECIES: glycine cleavage system protein T [Wolbachia]
WP_064085904.1	WP_010962516.1	WP_007549071.1	scaffold1908:12602-13532;scaffold4553:5610-6540;	WP_064085904.1 glutathione synthase [Wolbachia endosymbiont of Dactylopius coccus]
WP_064085902.1	WP_010962518.1	WP_007549070.1	scaffold1908:15063-16437;scaffold3342:17904-19278;	WP_064085902.1 dihydrolipoyl dehydrogenase [Wolbachia endosymbiont of Dactylopius coccus]
WP_064085505.1	WP_010962521.1	WP_012673163.1	scaffold789:37424-39758;scaffold1582:11845-14107;	WP_064085505.1 hypothetical protein [Wolbachia endosymbiont of Dactylopius coccus]
WP_064085883.1	WP_010962524.1	WP_007549100.1	scaffold432:69602-71267;scaffold431:42050-43640;	WP_064085883.1 hypothetical protein [Wolbachia endosymbiont of Dactylopius coccus]
WP_007301928.1	WP_010962525.1	WP_012673161.1	scaffold431:44124-44835;scaffold432:72497-73208;	WP_007301928.1 MULTISPECIES: heme exporter protein CcmC [Wolbachia]
WP_064085277.1	WP_010962529.1	WP_006280332.1	scaffold960:77965-79138;scaffold960:68825-70001;	WP_064085277.1 bifunctional 3-demethylubiquinol 3-O-methyltransferase/2-polyprenyl-6-hydroxyphenol methylase [Wolbachia endosymbiont of Dactylopius coccus]
WP_064085553.1	WP_010962530.1	WP_007548974.1	scaffold960:79816-81394;scaffold960:70610-72242;	WP_064085553.1 methionine--tRNA ligase [Wolbachia endosymbiont of Dactylopius coccus]
WP_064085731.1	WP_010962545.1	WP_006280192.1	scaffold431:84554-85925;scaffold2665:29559-30930;	WP_064085731.1 magnesium transporter [Wolbachia endosymbiont of Dactylopius coccus]
WP_064085437.1	WP_010962546.1	WP_012673153.1	scaffold2665:25538-26555;scaffold431:80807-81824;	WP_064085437.1 phosphate ABC transporter substrate-binding protein [Wolbachia endosymbiont of Dactylopius coccus]
WP_064085449.1	WP_010962554.1	WP_007549806.1	scaffold431:62291-64259;scaffold2665:12818-14786;	WP_064085449.1 transketolase [Wolbachia endosymbiont of Dactylopius coccus]
WP_064085642.1	WP_010962564.1	WP_012673148.1	scaffold2665:5302-7009;scaffold431:52590-54297;	WP_064085642.1 arginine--tRNA ligase [Wolbachia endosymbiont of Dactylopius coccus]
WP_064085501.1	WP_010962572.1	WP_007548818.1	scaffold1637:84936-86739;scaffold513:38153-39956;	WP_064085501.1 aspartate--tRNA ligase [Wolbachia endosymbiont of Dactylopius coccus]
WP_064085499.1	WP_010962573.1	WP_006279888.1	scaffold1637:75329-76250;scaffold513:35901-36822;	WP_064085499.1 RNA pseudouridine synthase [Wolbachia endosymbiont of Dactylopius coccus]
WP_064085941.1	WP_010962574.1	WP_010082641.1	scaffold513:42560-42989;scaffold1637:89971-90400;	WP_064085941.1 TIGR00701 family protein [Wolbachia endosymbiont of Dactylopius coccus]
WP_064085865.1	WP_010962578.1	WP_010962578.1	scaffold513:43265-44588;scaffold1637:90691-92026;	WP_064085865.1 tRNA (N6-isopentenyl adenosine(37)-C2)-methylthiotransferase MiaB [Wolbachia endosymbiont of Dactylopius coccus]
WP_064085864.1	WP_010962579.1	WP_007548628.1	scaffold1637:113135-115112;scaffold513:44654-47774;	WP_064085864.1 isoleucine--tRNA ligase [Wolbachia endosymbiont of Dactylopius coccus]
WP_064085862.1	WP_010962581.1	WP_012673135.1	scaffold513:50766-53163;scaffold1637:99822-102162;	WP_064085862.1 phenylalanine--tRNA ligase subunit beta [Wolbachia endosymbiont of Dactylopius coccus]
WP_064085858.1	WP_010962588.1	WP_012673132.1	scaffold513:58354-60349;scaffold1637:107345-108809;	WP_064085858.1 propionyl-CoA carboxylase [Wolbachia endosymbiont of Dactylopius coccus]
WP_064085762.1	WP_010962590.1	WP_012673130.1	scaffold513:61324-62764;scaffold347:9028-10621;	WP_064085762.1 glutamate--tRNA ligase [Wolbachia endosymbiont of Dactylopius coccus]
WP_064085333.1	WP_010962592.1	WP_012673129.1	scaffold2508:4799-6470;scaffold841:15582-17253;	WP_064085333.1 succinate dehydrogenase flavoprotein subunit [Wolbachia endosymbiont of Dactylopius coccus]
WP_064086023.1	WP_010962593.1	WP_007548772.1	scaffold841:34707-37389;scaffold841:13736-15611;	WP_064086023.1 hypothetical protein [Wolbachia endosymbiont of Dactylopius coccus]
WP_064085311.1	WP_010962597.1	WP_012673126.1	scaffold841:29247-30633;scaffold899:29446-30541;	WP_064085311.1 redox-regulated ATPase YchF [Wolbachia endosymbiont of Dactylopius coccus]
WP_064085300.1	WP_010962599.1	WP_012673124.1	scaffold899:27172-28342;scaffold841:26770-27940;scaffold841:6407-7580;	WP_064085300.1 poly(A) polymerase [Wolbachia endosymbiont of Dactylopius coccus]
WP_064085372.1	WP_010962612.1	WP_012673116.1	scaffold2665:60345-62916;scaffold250:53218-55876;	WP_064085372.1 valine--tRNA ligase [Wolbachia endosymbiont of Dactylopius coccus]
WP_010404888.1	WP_010962614.1	WP_007548882.1	scaffold513:93398-93914;scaffold2665:70849-71365;	WP_010404888.1 MULTISPECIES: gamma carbonic anhydrase family protein [Wolbachia]
WP_010404879.1	WP_010962617.1	WP_012673118.1	scaffold2665:65642-66050;scaffold513:90880-91288;	WP_010404879.1 MULTISPECIES: tRNA-specific adenosine deaminase [Wolbachia]
WP_064085735.1	WP_010962622.1	WP_007549284.1	scaffold960:46352-47747;scaffold1601:40956-42360;	WP_064085735.1 Malonyl-CoA decarboxylase [Wolbachia endosymbiont of Dactylopius coccus]
WP_064085411.1	WP_010962627.1	WP_012673110.1	scaffold960:60273-60999;scaffold1601:46336-47062;	WP_064085411.1 outer membrane protein assembly factor BamD [Wolbachia endosymbiont of Dactylopius coccus]
WP_007302836.1	WP_010962656.1	WP_006279326.1	scaffold789:1178-1370;scaffold65:25858-26050;	WP_007302836.1 MULTISPECIES: zinc-finger domain-containing protein [Wolbachia]
WP_010407205.1	WP_010962662.1	WP_012673141.1	scaffold1895:1149-2898;scaffold65:14827-16576;	WP_010407205.1 MULTISPECIES: glutamine--fructose-6-phosphate aminotransferase [Wolbachia]
WP_029237684.1	WP_010962674.1	WP_007549013.1	scaffold3968:28656-29931;scaffold3968:37407-38691;	WP_029237684.1 MULTISPECIES: hypothetical protein [Wolbachia]
WP_015587994.1	WP_010962675.1	WP_006280246.1	scaffold3968:38779-39958;scaffold3968:30019-31198;	WP_015587994.1 MULTISPECIES: acetylornithine transaminase [Wolbachia]
WP_082861184.1	WP_010962679.1	WP_007549910.1	scaffold872:109231-110155;scaffold789:93478-94633;	WP_082861184.1 patatin [Wolbachia endosymbiont of Dactylopius coccus]
WP_007302560.1	WP_010962739.1	WP_007549343.1	scaffold3725:4431-5577;scaffold899:4282-5437;	WP_007302560.1 MULTISPECIES: 3,4-dihydroxy-2-butanone-4-phosphate synthase [Wolbachia]
WP_010404706.1	WP_010962749.1	WP_007551152.1	scaffold3725:11445-12299;scaffold5760:5467-6321;	WP_010404706.1 MULTISPECIES: 50S ribosomal protein L6 [Wolbachia]
WP_064085567.1	WP_010962760.1	WP_006280739.1	scaffold1895:7631-8831;scaffold65:57-1149;	WP_064085567.1 carbamoyl phosphate synthase small subunit [Wolbachia endosymbiont of Dactylopius coccus]
WP_064085270.1	WP_010962772.1	WP_006280520.1	scaffold2789:53609-54617;scaffold431:122550-123558;	WP_064085270.1 tRNA (adenosine(37)-N6)-threonylcarbamoyltransferase complex transferase subunit TsaD [Wolbachia endosymbiont of Dactylopius coccus]
WP_007302232.1	WP_010962777.1	WP_012673221.1	scaffold2385:31296-31758;scaffold1392:95843-96305;	WP_007302232.1 MULTISPECIES: heme biosynthesis protein HemY [Wolbachia]
WP_064085387.1	WP_010962778.1	WP_007549196.1	scaffold2385:29948-31249;scaffold2385:27225-29633;	WP_064085387.1 deoxyguanosinetriphosphate triphosphohydrolase [Wolbachia endosymbiont of Dactylopius coccus]
WP_064085652.1	WP_010962789.1	WP_007552865.1	scaffold2729:8258-8822;scaffold250:70030-70594;	WP_064085652.1 hypothetical protein [Wolbachia endosymbiont of Dactylopius coccus]
WP_064085648.1	WP_010962793.1	WP_006280096.1	scaffold2729:12204-13341;scaffold250:65987-67124;	WP_064085648.1 hypothetical protein [Wolbachia endosymbiont of Dactylopius coccus]
WP_064085646.1	WP_010962796.1	WP_006280098.1	scaffold2729:14654-15560;scaffold250:61045-61951;scaffold250:63768-64674;	WP_064085646.1 glycerol-3-phosphate dehydrogenase [Wolbachia endosymbiont of Dactylopius coccus]
WP_010406882.1	WP_010962797.1	WP_006280099.1	scaffold250:59871-60642;scaffold250:62594-63365;	WP_010406882.1 MULTISPECIES: DNA-binding response regulator [Wolbachia]
WP_064085364.1	WP_010962806.1	WP_012673252.1	scaffold1392:77212-79255;scaffold2385:11618-13544;	WP_064085364.1 hypothetical protein [Wolbachia endosymbiont of Dactylopius coccus]
WP_010401376.1	WP_010962811.1	WP_012673248.1	scaffold1637:24089-24980;scaffold3342:13656-14547;scaffold1908:286-1168;	WP_010401376.1 MULTISPECIES: integrase [Wolbachia]
WP_064085259.1	WP_010962816.1	WP_007550039.1	scaffold716:28618-29491;scaffold1601:31912-32785;	WP_064085259.1 hypothetical protein [Wolbachia endosymbiont of Dactylopius coccus]
WP_064085255.1	WP_010962821.1	WP_006280659.1	scaffold717:87219-87750;scaffold716:22375-22906;	WP_064085255.1 Na+/H+ antiporter subunit E [Wolbachia endosymbiont of Dactylopius coccus]
WP_010402205.1	WP_010962823.1	WP_006280508.1	scaffold716:21038-22286;scaffold717:85884-87132;	WP_010402205.1 MULTISPECIES: prolipoprotein diacylglyceryl transferase [Wolbachia]
WP_064085532.1	WP_010962824.1	WP_006280392.1	scaffold431:123762-125478;scaffold2789:76354-78904;	WP_064085532.1 type I secretion system permease/ATPase [Wolbachia endosymbiont of Dactylopius coccus]
WP_064085285.1	WP_010962826.1	WP_041582614.1	scaffold2789:81329-82745;scaffold431:126801-128202;	WP_064085285.1 4-hydroxy-tetrahydrodipicolinate synthase [Wolbachia endosymbiont of Dactylopius coccus]
WP_064085928.1	WP_010962836.1	WP_012673218.1	scaffold716:64180-65599;scaffold789:134457-135876;	WP_064085928.1 isocitrate dehydrogenase [Wolbachia endosymbiont of Dactylopius coccus]
WP_010402249.1	WP_010962841.1	WP_012673267.1	scaffold513:95352-95907;scaffold2665:72803-73358;	WP_010402249.1 MULTISPECIES: nucleotide exchange factor GrpE [Wolbachia]
WP_064085274.1	WP_010962853.1	WP_006280400.1	scaffold1341:53769-55266;scaffold2789:24730-26227;	WP_064085274.1 cation:proton antiporter [Wolbachia endosymbiont of Dactylopius coccus]
WP_063631112.1	WP_010962854.1	WP_006280401.1	scaffold2789:24064-24724;scaffold1341:55272-55932;	WP_063631112.1 MULTISPECIES: conjugal transfer protein TraJ [Wolbachia]
WP_064085272.1	WP_010962856.1	WP_012673270.1	scaffold1341:56853-57675;scaffold2789:22378-23200;	WP_064085272.1 DNA polymerase III subunit delta' [Wolbachia endosymbiont of Dactylopius coccus]
WP_064085900.1	WP_010962889.1	WP_007548612.1	scaffold347:14941-16741;scaffold513:67236-69942;	WP_064085900.1 alanine--tRNA ligase [Wolbachia endosymbiont of Dactylopius coccus]
WP_007302082.1	WP_010962890.1	WP_006280113.1	scaffold513:66618-67062;scaffold347:14184-14628;	WP_007302082.1 MULTISPECIES: hypothetical protein [Wolbachia]
WP_064085641.1	WP_010962894.1	WP_007548603.1	scaffold347:22097-23078;scaffold513:74140-75121;	WP_064085641.1 malonyl CoA-acyl carrier protein transacylase [Wolbachia endosymbiont of Dactylopius coccus]
WP_064085640.1	WP_010962895.1	WP_006280584.1	scaffold513:75489-76284;scaffold347:23457-24252;	WP_064085640.1 NAD kinase [Wolbachia endosymbiont of Dactylopius coccus]
WP_064085639.1	WP_010962896.1	WP_007548601.1	scaffold513:76497-78363;scaffold347:24335-25724;	WP_064085639.1 hypothetical protein [Wolbachia endosymbiont of Dactylopius coccus]
WP_007302121.1	WP_010962900.1	WP_012673294.1	scaffold2385:1567-2280;scaffold1392:67698-68411;	WP_007302121.1 MULTISPECIES: 3'-5' exonuclease [Wolbachia]
WP_064085445.1	WP_010962907.1	WP_007548850.1	scaffold960:8116-9028;scaffold347:61242-62154;	WP_064085445.1 signal recognition particle-docking protein FtsY [Wolbachia endosymbiont of Dactylopius coccus]
WP_064085415.1	WP_010962916.1	WP_012673289.1	scaffold2385:25351-26320;scaffold1392:84519-85326;scaffold1392:92101-92476;	WP_064085415.1 hypothetical protein [Wolbachia endosymbiont of Dactylopius coccus]
WP_064085823.1	WP_010962921.1	WP_012673296.1	scaffold650:4878-7911;scaffold2729:37652-40724;	WP_064085823.1 phosphoribosylformylglycinamidine synthase [Wolbachia endosymbiont of Dactylopius coccus]
WP_064085318.1	WP_010962924.1	WP_012673297.1	scaffold2729:41710-44527;scaffold650:8929-11734;	WP_064085318.1 excinuclease ABC subunit A [Wolbachia endosymbiont of Dactylopius coccus]
WP_064085588.1	WP_010962951.1	WP_006280211.1	scaffold65:30427-32344;scaffold2729:87663-89577;	WP_064085588.1 DNA helicase II [Wolbachia endosymbiont of Dactylopius coccus]
WP_064085748.1	WP_010962962.1	WP_012673326.1	scaffold347:27310-28327;scaffold513:79195-80212;	WP_064085748.1 ferredoxin--NADP(+) reductase [Wolbachia endosymbiont of Dactylopius coccus]
WP_029237672.1	WP_010962967.1	WP_010962967.1	scaffold650:165820-166015;scaffold650:167112-167307;	WP_029237672.1 MULTISPECIES: 50S ribosomal protein L32 [Wolbachia]
WP_010406678.1	WP_010962969.1	WP_007548965.1	scaffold650:163419-163917;scaffold2729:61635-62133;	WP_010406678.1 MULTISPECIES: hypothetical protein [Wolbachia]
WP_064085754.1	WP_010962970.1	WP_007548967.1	scaffold2729:60389-61505;scaffold650:160886-161993;	WP_064085754.1 1-deoxy-D-xylulose-5-phosphate reductoisomerase [Wolbachia endosymbiont of Dactylopius coccus]
WP_064085613.1	WP_010962974.1	WP_012673328.1	scaffold432:4756-6175;scaffold1637:26523-27942;	WP_064085613.1 metalloprotease TldD [Wolbachia endosymbiont of Dactylopius coccus]
WP_017532452.1	WP_010962977.1	WP_006280373.1	scaffold1637:29268-30755;scaffold432:7142-8629;	WP_017532452.1 MULTISPECIES: exodeoxyribonuclease III [Wolbachia]
WP_064085244.1	WP_010962978.1	WP_012673330.1	scaffold1637:30790-31837;scaffold432:8664-9780;	WP_064085244.1 hypothetical protein [Wolbachia endosymbiont of Dactylopius coccus]
WP_026092648.1	WP_010962984.1	WP_006280233.1	scaffold1582:18273-19770;scaffold789:42777-44274;	WP_026092648.1 MULTISPECIES: lipid II flippase MurJ [Wolbachia]
WP_064085663.1	WP_010962985.1	WP_007548930.1	scaffold1582:19914-22530;scaffold789:44359-47287;	WP_064085663.1 hypothetical protein [Wolbachia endosymbiont of Dactylopius coccus]
WP_064085665.1	WP_010962986.1	WP_007549262.1	scaffold1582:23603-24788;scaffold789:48703-49912;	WP_064085665.1 phage portal protein [Wolbachia endosymbiont of Dactylopius coccus]
WP_064085485.1	WP_010962992.1	WP_012673336.1	scaffold2789:1650-2844;scaffold1341:79125-80319;	WP_064085485.1 aspartate aminotransferase [Wolbachia endosymbiont of Dactylopius coccus]
WP_064085482.1	WP_010962995.1	WP_012673343.1	scaffold1341:72746-74033;scaffold2789:7978-9265;	WP_064085482.1 serine hydroxymethyltransferase [Wolbachia endosymbiont of Dactylopius coccus]
WP_064086017.1	WP_010963005.1	WP_007548745.1	scaffold1392:132911-135325;scaffold1491:11493-14305;	WP_064086017.1 sodium:alanine symporter [Wolbachia endosymbiont of Dactylopius coccus]
WP_064085616.1	WP_010963018.1	WP_007550484.1	scaffold1491:4138-4825;scaffold1491:2557-3241;scaffold927:43147-43831;	WP_064085616.1 P44/Msp2 family outer membrane protein [Wolbachia endosymbiont of Dactylopius coccus]
WP_007302672.1	WP_010963039.1	WP_007548333.1	scaffold2789:121314-121962;scaffold5603:738-1386;	WP_007302672.1 MULTISPECIES: transcriptional regulator [Wolbachia]
WP_007302671.1	WP_010963040.1	WP_007548336.1	scaffold5603:238-631;scaffold2789:122068-122461;	WP_007302671.1 MULTISPECIES: molecular chaperone DnaK [Wolbachia]
WP_029237649.1	WP_010963044.1	WP_006280124.1	scaffold716:7586-9053;scaffold716:12842-14309;	WP_029237649.1 MULTISPECIES: monovalent cation/H+ antiporter subunit D [Wolbachia]
WP_029237648.1	WP_010963045.1	WP_012673408.1	scaffold716:14363-15458;scaffold717:78142-79237;	WP_029237648.1 MULTISPECIES: rod shape-determining protein RodA [Wolbachia]
WP_064085469.1	WP_010963051.1	WP_012673409.1	scaffold1392:27506-28838;scaffold716:35137-36469;	WP_064085469.1 hypothetical protein [Wolbachia endosymbiont of Dactylopius coccus]
WP_064085470.1	WP_010963052.1	WP_012673410.1	scaffold1392:25944-27321;scaffold716:36636-38013;	WP_064085470.1 UDP-N-acetylmuramoylalanyl-D-glutamate--2,6-diaminopimelate ligase [Wolbachia endosymbiont of Dactylopius coccus]
WP_064085952.1	WP_010963054.1	WP_006280185.1	scaffold1601:33537-35988;scaffold2789:62473-64432;scaffold960:35843-38294;	WP_064085952.1 DNA topoisomerase I [Wolbachia endosymbiont of Dactylopius coccus]
WP_010402890.1	WP_010963057.1	WP_012673341.1	scaffold960:32998-34597;scaffold717:103019-104618;	WP_010402890.1 MULTISPECIES: iron transporter permease [Wolbachia]
WP_010402894.1	WP_010963059.1	WP_007549063.1	scaffold717:93004-94072;scaffold650:133776-134841;	WP_010402894.1 MULTISPECIES: 5-(carboxyamino)imidazole ribonucleotide synthase [Wolbachia]
WP_010403701.1	WP_010963067.1	WP_007548724.1	scaffold347:37676-39203;scaffold347:42237-43764;scaffold960:22996-24523;	WP_010403701.1 MULTISPECIES: methylmalonyl-CoA carboxyltransferase [Wolbachia]
WP_064085515.1	WP_010963070.1	WP_012673370.1	scaffold960:16847-19127;scaffold347:50647-52789;	WP_064085515.1 competence protein ComEC [Wolbachia endosymbiont of Dactylopius coccus]
WP_064086007.1	WP_010963079.1	WP_006280214.1	scaffold789:58875-60222;scaffold1341:45797-47147;scaffold789:62441-63731;	WP_064086007.1 pyruvate dehydrogenase complex dihydrolipoamide acetyltransferase [Wolbachia endosymbiont of Dactylopius coccus]
WP_064085430.1	WP_010963084.1	WP_006280195.1	scaffold2789:44297-45116;scaffold650:67686-68508;	WP_064085430.1 hypothetical protein [Wolbachia endosymbiont of Dactylopius coccus]
WP_064085431.1	WP_010963085.1	WP_012673378.1	scaffold650:68511-69672;scaffold2789:43133-44294;	WP_064085431.1 glutamate--cysteine ligase [Wolbachia endosymbiont of Dactylopius coccus]
WP_064085682.1	WP_010963094.1	WP_007548482.1	scaffold513:21378-23382;scaffold1392:119905-122119;	WP_064085682.1 primosomal protein N' [Wolbachia endosymbiont of Dactylopius coccus]
WP_064085492.1	WP_010963103.1	WP_007548473.1	scaffold789:137304-139332;scaffold513:17-1169;	WP_064085492.1 succinate--CoA ligase subunit beta [Wolbachia endosymbiont of Dactylopius coccus]
WP_064085699.1	WP_010963114.1	WP_012673386.1	scaffold347:68096-69353;scaffold960:1546-2809;	WP_064085699.1 hypothetical protein [Wolbachia endosymbiont of Dactylopius coccus]
WP_064085700.1	WP_010963115.1	WP_006280310.1	scaffold347:69459-70749;scaffold960:130-1429;	WP_064085700.1 mannose-1-phosphate guanyltransferase [Wolbachia endosymbiont of Dactylopius coccus]
WP_064085284.1	WP_010963128.1	WP_012673390.1	scaffold717:49871-50995;scaffold2215:41865-42989;	WP_064085284.1 HAD family hydrolase [Wolbachia endosymbiont of Dactylopius coccus]
WP_064085313.1	WP_010963129.1	WP_006280475.1	scaffold717:38897-39488;scaffold2215:43565-44144;	WP_064085313.1 hypothetical protein [Wolbachia endosymbiont of Dactylopius coccus]
WP_064085907.1	WP_010963130.1	WP_010963130.1	scaffold717:36623-38920;scaffold717:46553-48727;scaffold2215:44174-46471;	WP_064085907.1 potassium transporter [Wolbachia endosymbiont of Dactylopius coccus]
WP_064085829.1	WP_010963133.1	WP_012673393.1	scaffold717:33285-35118;scaffold2215:50589-52422;	WP_064085829.1 cell division protein FtsH [Wolbachia endosymbiont of Dactylopius coccus]
WP_064085831.1	WP_010963134.1	WP_007548788.1	scaffold2215:52434-53727;scaffold717:31977-33273;	WP_064085831.1 tRNA lysidine(34) synthetase TilS [Wolbachia endosymbiont of Dactylopius coccus]
WP_064085835.1	WP_010963136.1	WP_007548792.1	scaffold2215:57457-58600;scaffold717:26077-27190;scaffold650:185683-186796;	WP_064085835.1 tRNA 2-thiouridine(34) synthase MnmA [Wolbachia endosymbiont of Dactylopius coccus]
WP_064085956.1	WP_010963153.1	WP_012673413.1	scaffold717:68511-69714;scaffold650:24057-25260;	WP_064085956.1 5-aminolevulinic acid synthase [Wolbachia endosymbiont of Dactylopius coccus]
WP_064085568.1	WP_010963164.1	WP_006280156.1	scaffold3968:19318-22768;scaffold2729:54197-56837;	WP_064085568.1 carbamoyl phosphate synthase large subunit, partial [Wolbachia endosymbiont of Dactylopius coccus]
WP_064085294.1	WP_010963171.1	WP_012673421.1	scaffold1123:7025-9671;scaffold65:62760-65406;	WP_064085294.1 2-oxoglutarate dehydrogenase E1 component [Wolbachia endosymbiont of Dactylopius coccus]
WP_064085424.1	WP_010963174.1	WP_012673422.1	scaffold1123:5029-6235;scaffold65:61186-61969;	WP_064085424.1 disulfide bond formation protein DsbA [Wolbachia endosymbiont of Dactylopius coccus]
WP_064085546.1	WP_010963176.1	WP_012673424.1	scaffold1123:1874-3362;scaffold65:52398-53886;	WP_064085546.1 hypothetical protein [Wolbachia endosymbiont of Dactylopius coccus]
WP_064085719.1	WP_010963178.1	WP_007548684.1	scaffold1637:65444-70955;scaffold872:22170-25782;	WP_064085719.1 translation initiation factor IF-2 [Wolbachia endosymbiont of Dactylopius coccus]
WP_007302792.1	WP_010963182.1	WP_006280263.1	scaffold872:15694-16432;scaffold1637:62044-62782;	WP_007302792.1 MULTISPECIES: glutamine synthetase [Wolbachia]
WP_064085325.1	WP_015589289.1	WP_012673310.1	scaffold650:126012-126459;scaffold650:126821-127274;	WP_064085325.1 hypothetical protein [Wolbachia endosymbiont of Dactylopius coccus]
WP_064085289.1	WP_022626165.1	WP_039963711.1	scaffold717:19345-20071;scaffold650:179154-179880;	WP_064085289.1 isoprenoid biosynthesis protein ElbB [Wolbachia endosymbiont of Dactylopius coccus]
WP_010403187.1	WP_022626167.1	WP_041582670.1	scaffold2215:37991-39839;scaffold717:53112-55062;	WP_010403187.1 MULTISPECIES: molecular chaperone HtpG [Wolbachia]
WP_064086013.1	WP_022626199.1	WP_039963707.1	scaffold2508:35602-36373;scaffold2508:44580-45366;scaffold3968:34600-35371;scaffold432:44797-45568;	WP_064086013.1 hypothetical protein [Wolbachia endosymbiont of Dactylopius coccus]
WP_064085267.1	WP_022626207.1	WP_012673068.1	scaffold1392:112390-113011;scaffold2385:38440-39061;	WP_064085267.1 hypothetical protein [Wolbachia endosymbiont of Dactylopius coccus]
WP_064085885.1	WP_022626228.1	WP_012673093.1	scaffold250:12247-13627;scaffold789:21249-22629;	WP_064085885.1 dihydroorotase [Wolbachia endosymbiont of Dactylopius coccus]
WP_064085305.1	WP_022626255.1	WP_012673157.1	scaffold2215:3444-5484;scaffold2665:36295-39772;	WP_064085305.1 DNA helicase UvrD [Wolbachia endosymbiont of Dactylopius coccus]
WP_064085732.1	WP_022626270.1	WP_006280171.1	scaffold513:7148-8624;scaffold927:38820-40335;	WP_064085732.1 secretion system protein [Wolbachia endosymbiont of Dactylopius coccus]
WP_064085307.1	WP_022626293.1	WP_084741728.1	scaffold2508:21851-24698;scaffold432:29925-33324;	WP_064085307.1 hypothetical protein [Wolbachia endosymbiont of Dactylopius coccus]
WP_064086026.1	WP_022626296.1	WP_012673145.1	scaffold2508:18941-21602;scaffold432:27027-29688;	WP_064086026.1 preprotein translocase subunit SecA [Wolbachia endosymbiont of Dactylopius coccus]
WP_007302771.1	WP_022626327.1	WP_007549174.1	scaffold1895:5832-6753;scaffold65:2015-2936;	WP_007302771.1 MULTISPECIES: fructose-bisphosphatase class II [Wolbachia]
WP_064085809.1	WP_022626370.1	WP_012673292.1	scaffold347:62140-63493;scaffold960:6777-8130;	WP_064085809.1 DNA repair protein RadA [Wolbachia endosymbiont of Dactylopius coccus]
WP_064085802.1	WP_022626390.1	WP_012673314.1	scaffold65:35511-37632;scaffold2729:77065-78757;	WP_064085802.1 NADH-quinone oxidoreductase subunit L [Wolbachia endosymbiont of Dactylopius coccus]
WP_064085619.1	WP_022626404.1	WP_012673355.1	scaffold1491:6645-7803;scaffold1392:127372-128530;	WP_064085619.1 DNA polymerase III subunit beta [Wolbachia endosymbiont of Dactylopius coccus]
WP_064085940.1	WP_038198955.1	WP_039964168.1	scaffold3725:92-1685;scaffold899:7892-9485;	WP_064085940.1 hemolysin D [Wolbachia endosymbiont of Dactylopius coccus]
WP_064085909.1	WP_038227975.1	WP_015589469.1	scaffold2215:48109-48754;scaffold717:35930-36563;	WP_064085909.1 dTMP kinase [Wolbachia endosymbiont of Dactylopius coccus]
WP_064085838.1	WP_038228080.1	WP_007548451.1	scaffold717:22457-23603;scaffold650:182231-183431;	WP_064085838.1 peptidylprolyl isomerase [Wolbachia endosymbiont of Dactylopius coccus]
WP_064085341.1	WP_038228260.1	WP_012673104.1	scaffold513:8631-9594;scaffold927:40342-41305;	WP_064085341.1 P44/Msp2 family outer membrane protein [Wolbachia endosymbiont of Dactylopius coccus]
WP_064085824.1	WP_038228317.1	WP_041582620.1	scaffold650:2071-4783;scaffold2729:34971-37557;scaffold2729:25500-28158;	WP_064085824.1 recombinase RecB [Wolbachia endosymbiont of Dactylopius coccus]
WP_082861204.1	WP_041580618.1	WP_039963806.1	scaffold431:27283-29794;scaffold1601:194-2762;scaffold2789:64367-66725;scaffold2508:13055-14279;	WP_082861204.1 DNA mismatch repair protein MutS, partial [Wolbachia endosymbiont of Dactylopius coccus]
WP_064085969.1	WP_041580639.1	WP_006280237.1	scaffold1392:174318-175029;scaffold1392:212848-213568;	WP_064085969.1 hypothetical protein [Wolbachia endosymbiont of Dactylopius coccus]
WP_010406444.1	WP_041580658.1	WP_006280200.1	scaffold650:69787-71834;scaffold2789:40971-43018;	WP_010406444.1 MULTISPECIES: ATP-dependent protease ATP-binding subunit HslU [Wolbachia]
WP_064085314.1	WP_080717607.1	WP_051955852.1	scaffold2665:73896-74106;scaffold65:68902-68992;	WP_064085314.1 hypothetical protein [Wolbachia endosymbiont of Dactylopius coccus]
WP_064086018.1	WP_081420828.1	WP_083250476.1	scaffold1392:137780-138749;scaffold1341:19548-20517;	WP_064086018.1 zinc transporter ZitB [Wolbachia endosymbiont of Dactylopius coccus]
