# Supplementary material for: The first draft genomes of the ant Formica exsecta, and its Wolbachia endosymbiont reveal extensive gene transfer from endosymbiont to host
Source: BMC Genomics. 2019 Apr 16;20:301. doi: 10.1186/s12864-019-5665-6 (PMC6469114; doi:10.1186/s12864-019-5665-6)
Supplement: Supplementary file 8 — Table S7. List of conserved Wolbachia genes used for phylogenetic analysis. (XLSX 14 kb) [file 12864_2019_5665_MOESM8_ESM.xlsx]

## Sheet: Sheet2
Table S7: List of conserved Wolbachia genes used for phylogenetic analysis.
Gene Name	seq	Alignment length	method	Model	f(a)	f(c)	f(g)	f(t)	kappa	titv	Ra	Rb	Rc	Rd	Re	Rf	pInv	gamma	Copy
Peptide chain release factor 1	C16402387_0-879_bestModel	1092	BIC	GTR+I	0.41	0.14	0.21	0.24	0.00	0.00	3.198	16.050	1.086	0.981	43.260	1.000	0.62	N/A	Single Copy
Ribosomal silencing factor RsfS	scaffold1392_35715-36033_bestModel	327	BIC	HKY+G	0.39	0.13	0.20	0.28	13.30	6.21	1.000	13.301	1.000	1.000	13.301	1.000	N/A	0.56	Single Copy
50S ribosomal protein L10	scaffold1498_42886-43339_bestModel	519	BIC	HKY+I	0.32	0.13	0.20	0.35	21.73	9.49	1.000	21.731	1.000	1.000	21.731	1.000	0.47	N/A	Single Copy
Pyruvate, phosphate dikinase	scaffold1637_9114-11835_bestModel	2794	BIC	GTR+I+G	0.35	0.15	0.22	0.28	0.00	0.00	1.383	9.647	0.319	0.345	12.694	1.000	0.46	1.31	Single Copy
Dioxygenase	scaffold1908_36044-36710_bestModel	675	BIC	HKY+I	0.34	0.15	0.20	0.32	23.88	10.88	1.000	23.882	1.000	1.000	23.882	1.000	0.48	N/A	Single Copy
Rod shape-determining protein MreB	scaffold2215_56064-57141_bestModel	1077	BIC	GTR+G	0.33	0.14	0.23	0.30	0.00	0.00	1.885	16.140	0.496	0.821	37.272	1.000	N/A	0.17	Single Copy
5'-nucleotidase SurE	scaffold2279_25176-25929_bestModel	774	BIC	GTR+G	0.36	0.13	0.20	0.31	0.00	0.00	5.879	27.940	0.651	1.176	42.195	1.000	N/A	0.34	Single Copy
BON domain protein	scaffold4553_4953-5550_bestModel	603	BIC	HKY+G	0.39	0.16	0.18	0.27	23.02	10.74	1.000	23.018	1.000	1.000	23.018	1.000	N/A	0.43	Single Copy
Fructose-bisphosphate aldolase	scaffold5063_2773-3679_bestModel	906	BIC	HKY+G	0.33	0.17	0.21	0.29	16.80	8.02	1.000	16.800	1.000	1.000	16.800	1.000	N/A	0.23	Single Copy
Ribonucleoside-diphosphate reductase	scaffold650_1-1390_bestModel	1785	BIC	GTR+G	0.37	0.17	0.18	0.28	0.00	0.00	2.039	17.085	0.891	1.206	38.129	1.000	N/A	0.25	Single Copy
Ribonuclease D	scaffold650_155746-156925_bestModel	1215	BIC	HKY+G	0.35	0.13	0.20	0.31	17.27	7.86	1.000	17.269	1.000	1.000	17.269	1.000	N/A	0.70	Single Copy
Protein-export membrane protein SecF	scaffold789_27172-28048_bestModel	886	BIC	HKY+G	0.32	0.14	0.20	0.35	15.28	6.80	1.000	15.275	1.000	1.000	15.275	1.000	N/A	0.51	Single Copy

## Sheet: Sheet1
								Wolbachia sp. subsp. Drosophila simulans (strain wRi) GN	htpG PE	3 SV	1
			C16402387:0-879	C16402387:0-879		scaffold717:53112-55062	Chaperone protein HtpG	Wolbachia endosymbiont of Drosophila ananassae GN	purK PE	3 SV	1
			scaffold1392:146996-148576	scaffold1392:146996-148576		scaffold717:93004-94072	N5-carboxyaminoimidazole ribonucleotide synthase	Wolbachia pipientis wMel GN	rsfS PE	3 SV	1
			scaffold1392:35715-36033	scaffold1392:35715-36033		scaffold1392:35715-36033	Ribosomal silencing factor RsfS	Wolbachia endosymbiont of Dactylopius coccus GN	TV42_04425 PE	3 SV	1
			scaffold1392:97234-98371	scaffold1392:97234-98371		scaffold1392:97234-98371	Aminotransferase class V	Wolbachia endosymbiont of Dactylopius coccus GN	TV42_02545 PE	4 SV	1
			scaffold1498:42886-43339	scaffold1498:42886-43339		scaffold1392:146996-148576	2-nitropropane dioxygenase	Wolbachia endosymbiont of Dactylopius coccus GN	rho PE	3 SV	1
			scaffold1582:7743-9393	scaffold1582:7743-9393		scaffold3661:18421-19825	Transcription termination factor Rho	Wolbachia pipientis wVitA GN	dnaK PE	2 SV	1
			scaffold1637:17786-19058	scaffold1637:17786-19058		scaffold2827:15275-17198	Chaperone protein DnaK	Wolbachia endosymbiont of Muscidifurax uniraptor GN	secF PE	3 SV	1
			scaffold1637:86934-87993	scaffold1637:86934-87993		scaffold789:27172-28048	Protein-export membrane protein SecF	Wolbachia endosymbiont of Drosophila ananassae GN	gpmI PE	3 SV	1
			scaffold1637:9114-11835	scaffold1637:9114-11835		scaffold347:18339-19860	2,3-bisphosphoglycerate-independent phosphoglycerate mutase	Wolbachia pipientis wVitA GN	N499_0567 PE	4 SV	1
			scaffold1895:5832-6753	scaffold1895:5832-6753		scaffold347:37676-39203	Carboxyl transferase domain protein	Wolbachia endosymbiont of Dactylopius coccus GN	ftsY PE	3 SV	1
			scaffold1908:22272-24867	scaffold1908:22272-24867		scaffold347:61242-62154	Signal recognition particle receptor FtsY	Wolbachia endosymbiont of Drosophila simulans wHa GN	ubiG PE	3 SV	1
			scaffold1908:32744-35885	scaffold1908:32744-35885		scaffold960:68825-70001	Ubiquinone biosynthesis O-methyltransferase	Wolbachia endosymbiont of Dactylopius coccus GN	TV42_00350 PE	4 SV	1
			scaffold1908:36044-36710	scaffold1908:36044-36710		scaffold5063:2773-3679	Fructose-bisphosphate aldolase	Wolbachia endosymbiont of Dactylopius coccus GN	surE PE	3 SV	1
			scaffold2215:41865-42989	scaffold2215:41865-42989		scaffold2279:25176-25929	5'-nucleotidase SurE	Wolbachia pipientis wMel GN	coxA PE	3 SV	1
			scaffold2215:56064-57141	scaffold2215:56064-57141		scaffold899:13174-14725	Cytochrome c oxidase subunit 1	Wolbachia pipientis wMel GN	nrdA PE	3 SV	1
			scaffold2279:25176-25929	scaffold2279:25176-25929		scaffold650:1-1390	Ribonucleoside-diphosphate reductase	Wolbachia endosymbiont of Dactylopius coccus GN	TV42_04715 PE	4 SV	1
			scaffold250:12247-13627	scaffold250:12247-13627		scaffold650:155746-156925	Ribonuclease D	Wolbachia endosymbiont of Dactylopius coccus GN	glpX PE	3 SV	1
			scaffold250:15686-17516	scaffold250:15686-17516		scaffold1895:5832-6753	Fructose-1,6-bisphosphatase	Wolbachia endosymbiont of Drosophila simulans wHa GN	wHa_01260 PE	3 SV	1
			scaffold2508:15671-17234	scaffold2508:15671-17234		scaffold1908:22272-24867	Aconitate hydratase	Wolbachia endosymbiont of Dactylopius coccus GN	TV42_01315 PE	3 SV	1
			scaffold2508:28171-29413	scaffold2508:28171-29413		scaffold1908:32744-35885	Bifunctional protein PutA	Wolbachia endosymbiont of Dactylopius coccus GN	TV42_05320 PE	4 SV	1
			scaffold2827:15275-17198	scaffold2827:15275-17198		scaffold1908:36044-36710	Dioxygenase	Wolbachia pipientis wVitA GN	pyrC PE	3 SV	1
			scaffold347:18339-19860	scaffold347:18339-19860		scaffold250:12247-13627	Dihydroorotase	Wolbachia sp. subsp. Drosophila simulans (strain wRi) GN	WRi_002160 PE	4 SV	1
			scaffold347:37676-39203	scaffold347:37676-39203		scaffold250:15686-17516	GTP-binding protein TypA	Wolbachia endosymbiont of Dactylopius coccus GN	guaA PE	3 SV	1
			scaffold347:61242-62154	scaffold347:61242-62154		scaffold2508:15671-17234	GMP synthase [glutamine-hydrolyzing]	Wolbachia endosymbiont of Dactylopius coccus GN	TV42_01130 PE	4 SV	1
			scaffold3661:18421-19825	scaffold3661:18421-19825		scaffold2508:28171-29413	Uncharacterized protein	Wolbachia endosymbiont of Drosophila ananassae GN	prfA PE	3 SV	1
			scaffold431:44970-45789	scaffold431:44970-45789		C16402387:0-879	Peptide chain release factor 1	Wolbachia GN	yqfL PE	3 SV	1
			scaffold4553:4953-5550	scaffold4553:4953-5550		scaffold431:44970-45789	Putative pyruvate, phosphate dikinase regulatory protein	Wolbachia endosymbiont of Dactylopius coccus GN	TV42_02090 PE	3 SV	1
			scaffold5063:2773-3679	scaffold5063:2773-3679		scaffold1498:42886-43339	50S ribosomal protein L10	Wolbachia GN	gph PE	4 SV	1
			scaffold650:1-1390	scaffold650:1-1390		scaffold2215:41865-42989	Hydrolase, haloacid dehalogenase-like family	Wolbachia endosymbiont of Dactylopius coccus GN	TV42_01425 PE	4 SV	1
			scaffold650:155746-156925	scaffold650:155746-156925		scaffold2215:56064-57141	Rod shape-determining protein MreB	Wolbachia endosymbiont of Dactylopius coccus GN	TV42_01260 PE	4 SV	1
			scaffold717:53112-55062	scaffold717:53112-55062		scaffold4553:4953-5550	BON domain protein	Wolbachia pipientis wMel GN	groL PE	3 SV	1
			scaffold717:93004-94072	scaffold717:93004-94072		scaffold1582:7743-9393	60 kDa chaperonin	Wolbachia endosymbiont of Dactylopius coccus GN	TV42_01875 PE	3 SV	1
			scaffold789:27172-28048	scaffold789:27172-28048		scaffold1637:9114-11835	Pyruvate, phosphate dikinase	Wolbachia endosymbiont of Dactylopius coccus GN	purD PE	3 SV	1
			scaffold899:13174-14725	scaffold899:13174-14725		scaffold1637:17786-19058	Phosphoribosylamine--glycine ligase	Wolbachia endosymbiont of Dactylopius coccus GN	TV42_04340 PE	3 SV	1
			scaffold960:68825-70001	scaffold960:68825-70001		scaffold1637:86934-87993	Heme-transporting ATPase
