# Supplementary material for: The first draft genomes of the ant Formica exsecta, and its Wolbachia endosymbiont reveal extensive gene transfer from endosymbiont to host
Source: BMC Genomics. 2019 Apr 16;20:301. doi: 10.1186/s12864-019-5665-6 (PMC6469114; doi:10.1186/s12864-019-5665-6)
Supplement: Supplementary file 9 — Table S8. List of species-specific genes in wFex genome, as identified by OrthoVenn. (XLSX 15 kb) [file 12864_2019_5665_MOESM9_ESM.xlsx]

## Sheet: Table S8
Table S8: List of species-specific genes in wFex genome, as identified by OrthoVenn.
wFEX_SeqName	Protein Length	Description	e-Value	sim mean
scaffold432_41170-42349	392	ankyrin repeat domain	4.77846E-129	71.0
scaffold1582_26930-28719	430	ankyrin repeat-containing	1.75197E-150	63.0
scaffold2508_31112-32961	430	ankyrin repeat-containing	1.24585E-158	64.0
scaffold1637_123180-123906	241	ATP synthase A subunit	4.8297E-153	95.0
scaffold347_1111-1837	241	ATP synthase A subunit	7.37501E-151	94.0
scaffold927_12890-13199	102	conserved hypothetical protein	1.09066E-13	65.0
scaffold717_57325-57619	97	conserved hypothetical protein (Ankyrin repeat domain)	2.25345E-16	66.0
scaffold872_116906-117170	87	gp22 protein	4.2441E-51	95.0
scaffold927_2453-2717	87	gp22 protein	1.37327E-51	96.0
scaffold1637_73295-73778	160	hydrolase	0.97896	64.0
scaffold250_102716-102875	52	hypothetical protein	2.28044E-25	98.0
scaffold250_82895-83078	60	hypothetical protein	3.34076E-29	93.0
scaffold513_72075-72480	134	hypothetical protein Aasi_1510	3.76751E-31	64.0
scaffold431_19678-20080	133	hypothetical protein COdytL_13094	4.43815E-33	66.0
scaffold431_5071-5473	133	hypothetical protein COdytL_13094	9.83351E-33	66.0
scaffold2789_50752-51055	100	hypothetical protein MGG_06775	4.3567	42.0
scaffold1341_10105-10225	39	hypothetical protein WALBB_230018	5.66815E-8	79.0
scaffold1341_72499-72643	47	hypothetical protein WALBB_230018	2.85153E-8	67.0
scaffold1392_98500-98620	39	hypothetical protein WALBB_230018	1.13692E-7	76.0
scaffold1601_42701-42821	39	hypothetical protein WALBB_230018	6.64021E-8	76.0
scaffold1637_26207-26315	35	hypothetical protein WALBB_230018	2.26395E-6	70.0
scaffold1895_3361-3481	39	hypothetical protein WALBB_230018	2.8531E-8	79.0
scaffold2385_2553-2661	35	hypothetical protein WALBB_230018	1.45271E-5	67.0
scaffold2789_9429-9537	35	hypothetical protein WALBB_230018	1.58553E-8	79.0
scaffold431_14070-14178	35	hypothetical protein WALBB_230018	1.03136E-6	73.0
scaffold4553_9624-9744	47	hypothetical protein WALBB_230018	4.74995E-6	70.0
scaffold513_62861-62969	35	hypothetical protein WALBB_230018	7.07582E-6	70.0
scaffold650_1563-1695	43	hypothetical protein WALBB_230018	1.63257E-8	67.0
scaffold960_40869-40989	39	hypothetical protein WALBB_230018	4.99382E-8	76.0
scaffold1601_2948-3143	64	hypothetical protein Wbm0230	1.24617E-8	67.0
scaffold431_36815-37004	62	hypothetical protein Wbm0467	2.12274E-14	70.0
scaffold2665_36012-36162	49	hypothetical protein WD0386	8.33893E-20	87.0
scaffold431_69003-69138	44	hypothetical protein WD0386	3.29948E-21	95.0
scaffold1582_29544-29712	55	hypothetical protein WD0459	1.97002E-14	97.0
scaffold1582_31311-31452	46	hypothetical protein WD0459	1.64935E-14	87.0
scaffold1375_8608-8755	48	hypothetical protein WD0497	2.38472E-10	86.0
scaffold716_39262-39409	48	hypothetical protein WD0497	3.09198E-11	91.0
scaffold789_132867-133014	48	hypothetical protein WD0497	1.19514E-13	94.0
scaffold899_24192-24255	64	hypothetical protein WD0497	1.35173E-10	91.0
scaffold960_44276-44462	61	hypothetical protein WD0497	1.88786E-14	90.0
scaffold432_74823-74985	53	hypothetical protein WD0528	0.00589601	69.0
scaffold1582_627-933	101	hypothetical protein WD0829	1.43696E-11	73.0
scaffold3144_7911-8262	116	hypothetical protein WD0829	1.58587E-10	74.0
scaffold650_116538-116643	34	hypothetical protein WD0836	6.38727E-13	94.0
scaffold1123_11666-11807	46	hypothetical protein WD0861	9.30335E-11	71.0
scaffold650_129559-129748	62	hypothetical protein WD0861	9.95081E-19	83.0
scaffold1341_25278-25398	39	hypothetical protein WD0984	1.53547E-15	92.0
scaffold513_63166-63376	69	hypothetical protein WD0984	3.89983E-14	94.0
scaffold1123_21168-21282	37	hypothetical protein WD1036	1.22998E-10	78.0
scaffold2729_59287-59506	72	hypothetical protein WD1181	0.153689	51.0
scaffold250_8172-8349	58	hypothetical protein WD1219	5.80775E-5	71.0
scaffold3968_17309-17465	51	hypothetical protein WD1291	2.79267E-12	84.0
scaffold789_149975-150110	44	hypothetical protein WD1291	9.28732E-16	88.0
scaffold1498_31262-32144	293	hypothetical protein Wendoof_01000901	1.73427E-30	59.0
scaffold716_57867-58704	278	hypothetical protein Wendoof_01000901	3.64652E-31	58.0
scaffold960_38586-38709	40	hypothetical protein WendwoN_05096, partial	1.56828E-14	95.0
scaffold650_29590-31842	448	hypothetical protein WPa_0782	0.0	88.0
scaffold927_19871-23525	1217	hypothetical protein WPa_0782	0.0	83.0
scaffold1392_36113-36257	47	hypothetical protein WPa_0860	1.03136E-12	84.0
scaffold716_31670-31865	64	hypothetical protein WPa_0860	1.61818E-10	73.0
scaffold1601_52290-52416	41	hypothetical protein WPa_1203	1.17422E-7	79.0
scaffold960_75026-75152	41	hypothetical protein WPa_1203	3.29234E-7	79.0
scaffold1392_109579-109753	57	hypothetical protein WRi_011260	4.99771E-33	98.0
scaffold2729_59923-59962	70	hypothetical protein WRi_011260	5.16531E-32	100.0
scaffold250_51795-53163	455	hypothetical protein WUni_003780	1.33602E-47	84.0
scaffold2665_58835-60272	478	hypothetical protein WUni_003780	2.23236E-43	81.0
scaffold1498_34296-34547	44	hypothetical protein WUni_006690	5.27824E-10	78.0
scaffold1637_19083-19284	66	hypothetical protein WUni_006690	1.25143E-6	79.0
scaffold1637_7707-7881	57	hypothetical protein WUni_006690	5.19235E-7	79.0
scaffold3144_19495-19642	48	hypothetical protein WUni_006690	3.38222E-13	77.0
scaffold960_55449-55700	44	hypothetical protein WUni_006690	3.22335E-11	81.0
scaffold2508_30700-30895	64	hypothetical protein WUni_009560	0.0764799	58.0
scaffold650_36143-36387	34	hypothetical protein WwAna0302	1.33782E-11	91.0
scaffold1601_46265-46442	58	hypothetical protein WwAna0756	3.91912E-31	96.0
scaffold960_60202-60379	58	hypothetical protein WwAna0756	8.08038E-30	94.0
scaffold1582_15105-15414	102	hypothetical protein WwAna1196	3.77164E-59	97.0
scaffold1582_18257-18566	102	hypothetical protein WwAna1196	3.49901E-63	99.0
scaffold2279_11281-11443	53	hypothetical protein WwAna1339	4.03242E-13	85.0
scaffold2279_29843-30011	55	hypothetical protein WwAna1339	1.83509E-12	80.0
scaffold1392_179879-180833	317	hypothetical protein WwSim0310	1.48656E-135	87.0
scaffold1392_211540-212233	230	hypothetical protein WwSim0310	6.26843E-75	82.0
scaffold1491_27248-27713	154	outer membrane	3.96627E-38	63.0
scaffold1601_5759-6008	82	outer membrane	0.0220568	59.0
scaffold1392_168909-169914	334	phage related	0.0	99.0
scaffold1392_221393-222398	334	phage related	0.0	99.0
scaffold872_114918-115173	84	phage related	2.22563E-36	86.0
scaffold927_3472-3727	84	phage related	2.29089E-35	86.0
scaffold1341_69572-70994	473	phage related ATPase	0.0	95.0
scaffold2789_10050-11463	470	phage related ATPase	0.0	96.0
scaffold872_112502-114803	766	Phage tail tape measure	0.0	89.0
scaffold927_4107-5784	558	Phage tail tape measure	0.0	93.0
scaffold650_46971-47166	64	phage uncharacterized protein	4.28595E-19	80.0
scaffold789_153980-154247	88	phage uncharacterized protein	9.86539E-12	86.0
scaffold650_13854-16161	768	phage-tail related (phageMin_Tail)	0.0	88.0
scaffold1392_40321-40486	54	phospho-N-acetylmuramoyl-pentapeptide-transferase	7.63142	61.0
scaffold2729_23950-24232	93	proton channel	0.452527	44.0
scaffold513_24100-24919	272	putative membrane protein	5.08297E-31	77.0
scaffold1341_17596-17872	91	putative transposase	2.1795E-17	95.0
scaffold3826_8675-8840	70	putative transposase	4.14486E-26	98.0
scaffold2508_12541-12898	118	signaling protein	2.7139	45.0
scaffold2729_24698-25049	116	SPFH domain Band 7 family	8.77056E-23	92.0
scaffold2729_45767-46118	116	SPFH domain Band 7 family	7.42334E-23	92.0
scaffold872_81614-81941	108	SPFH domain Band 7 family	2.27458E-17	86.0
scaffold872_104263-105019	251	transcriptional regulator	1.2001E-22	48.0
scaffold872_94724-95519	264	transcriptional regulator (Helix-turn-helix type 3)	1.77258E-23	48.0
scaffold1375_9237-10089	283	transposase	3.64684E-153	85.0
scaffold347_17973-18255	93	transposase	1.1923E-29	91.0
scaffold650_121135-121282	48	transposase	1.16582E-14	78.0
scaffold65_13546-13939	130	transposase	4.17114E-61	83.0
scaffold65_14059-14353	97	transposase	1.19512E-41	85.0
scaffold872_26653-27508	284	transposase	1.32312E-146	84.0
scaffold650_110080-110365	94	unnamed protein product	4.95714	47.0
scaffold1123_12188-12299	36	---NA---
scaffold1341_50211-50298	28	---NA---
scaffold1392_146387-146564	58	---NA---
scaffold1392_71293-71380	28	---NA---
scaffold1582_26682-26814	43	---NA---
scaffold1582_467-608	46	---NA---
scaffold1601_32936-33026	29	---NA---
scaffold1601_36280-36391	36	---NA---
scaffold1895_3096-3225	42	---NA---
scaffold2215_40043-40160	38	---NA---
scaffold2385_179-317	45	---NA---
scaffold2508_33065-33164	61	---NA---
scaffold250_119081-119240	52	---NA---
scaffold250_17733-17850	38	---NA---
scaffold2665_34786-34948	53	---NA---
scaffold2729_59792-59864	23	---NA---
scaffold2827_8032-8140	35	---NA---
scaffold3661_22687-22777	29	---NA---
scaffold3661_23031-23130	32	---NA---
scaffold3968_24894-24996	33	---NA---
scaffold431_58499-58616	38	---NA---
scaffold650_128582-128720	45	---NA---
scaffold650_143422-143521	32	---NA---
scaffold650_35086-35330	100	---NA---
scaffold650_60465-60549	27	---NA---
scaffold65_14506-14635	42	---NA---
scaffold717_35620-35713	30	---NA---
scaffold789_152073-152157	27	---NA---
scaffold789_94713-94872	52	---NA---
scaffold927_34614-34939	61	---NA---
